# Supplementary material for: Endothelial Protein C Receptor Function in Murine and Human Breast Cancer Development
Source: PubMed Central journal article supplement (PMC3621887; doi:10.1371/journal.pone.0061071), 2013-04-09
Supplement: pone.0061071.s005.pdf [file pone.0061071.s005.pdf]

**Table S2: Microarray data analysis.**

**A Pathway analysis:** The clustered differentially expressed genes between EPCR<sup>+</sup> versus EPCR<sup>-</sup> samples (see Table S1) were used as input to Ingenuity IPA. The tables below show the top 5 scoring Canonical Pathways identified for each of the 10 branches with a cutoff of  $p \leq 0.05$  (1.3).

**Branch 1 (upregulated genes in EPCR<sup>+</sup> cells): Top 5 Canonical Pathways**

| Ingenuity Canonical Pathways                                    | -log(p-value) | Ratio  | Molecules                                                     |
|-----------------------------------------------------------------|---------------|--------|---------------------------------------------------------------|
| Fcγ Receptor-mediated Phagocytosis in Macrophages and Monocytes | 2.1           | 0.0588 | MYO5A, TLN2, ARPC1B, FCGR2A, VAV3, PRKD1                      |
| Cardiac β-adrenergic Signaling                                  | 1.92          | 0.0455 | PRKACB, GNG11, PPP1R7, GNG2, CACNA1A, MPPE1, PKIG             |
| HER-2 Signaling in Breast Cancer                                | 1.86          | 0.0625 | CCNE1, ERBB3, PIK3R4, ITGB5, PRKD1                            |
| Intrinsic Prothrombin Activation Pathway                        | 1.82          | 0.0938 | F12, PROS1, COL3A1                                            |
| Huntington's Disease Signaling                                  | 1.68          | 0.0381 | GNG11, POLR2C, HSPA1L, CDK5, GNG2, PIK3R4, GOSR2, SNCA, PRKD1 |

**Branch 2 (upregulated genes in EPCR<sup>+</sup> cells): Top 5 Canonical Pathways**

| Ingenuity Canonical Pathways                              | -log(p-value) | Ratio  | Molecules                                                                |
|-----------------------------------------------------------|---------------|--------|--------------------------------------------------------------------------|
| Cdc42 Signaling                                           | 4.94          | 0.0506 | MYLK, MYL9, HLA-DMA, WIPF1, HLA-DMB, HLA-DPB1, HLA-DRB5, HLA-DPA1, ITGA4 |
| Antigen Presentation Pathway                              | 4.79          | 0.125  | HLA-DMA, HLA-DMB, HLA-DPB1, HLA-DRB5, HLA-DPA1                           |
| Cytotoxic T Lymphocyte-mediated Apoptosis of Target Cells | 3.18          | 0.0588 | HLA-DMA, HLA-DMB, HLA-DPB1, HLA-DRB5, HLA-DPA1                           |
| Allograft Rejection Signaling                             | 3.13          | 0.0526 | HLA-DMA, HLA-DMB, HLA-DPB1, HLA-DRB5, HLA-DPA1                           |
| OX40 Signaling Pathway                                    | 3.06          | 0.0532 | HLA-DMA, HLA-DMB, HLA-DPB1, HLA-DRB5, HLA-DPA1                           |

**Branch 3 (upregulated genes in EPCR<sup>+</sup> cells): Top 5 Canonical Pathways**

| Ingenuity Canonical Pathways        | -log(p-value) | Ratio  | Molecules            |
|-------------------------------------|---------------|--------|----------------------|
| Antigen Presentation Pathway        | 3.74          | 0.075  | HLA-DRA, CD74, HLA-F |
| Complement System                   | 2.36          | 0.0571 | C1R, C3              |
| B Cell Development                  | 2.31          | 0.0556 | IL7R, HLA-DRA        |
| Atherosclerosis Signaling           | 2.3           | 0.0233 | COL1A2, VCAM1, MMP3  |
| Graft-versus-Host Disease Signaling | 2.08          | 0.04   | HLA-DRA, HLA-F       |

**Branch 4 (upregulated genes in EPCR<sup>+</sup> cells): Top 5 Canonical Pathways**

| Ingenuity Canonical Pathways           | -log(p-value) | Ratio  | Molecules                    |
|----------------------------------------|---------------|--------|------------------------------|
| B Cell Development                     | 3.73          | 0.0833 | HLA-DQA1, HLA-DRB1, HLA-DQB1 |
| Graft-versus-Host Disease Signaling    | 3.38          | 0.06   | HLA-DQA1, HLA-DRB1, HLA-DQB1 |
| Autoimmune Thyroid Disease Signaling   | 3.35          | 0.0492 | HLA-DQA1, HLA-DRB1, HLA-DQB1 |
| Nur77 Signaling in T Lymphocytes       | 3.15          | 0.0476 | HLA-DQA1, HLA-DRB1, HLA-DQB1 |
| Calcium-induced T Lymphocyte Apoptosis | 3             | 0.0429 | HLA-DQA1, HLA-DRB1, HLA-DQB1 |

**Branch 5 (upregulated genes in EPCR<sup>+</sup> cells): Top 5 Canonical Pathways**

| Ingenuity Canonical Pathways        | -log(p-value) | Ratio  | Molecules                                                                                                               |
|-------------------------------------|---------------|--------|-------------------------------------------------------------------------------------------------------------------------|
| Huntington's Disease Signaling      | 3.68          | 0.072  | CAPN5, PIK3C2B, PIK3CA, POLR2D, GLS, DNMT3, CREB3L4, GPAA1, GNG7, EP300, TAF9B, CTSD, GNB3, ARFIP2, PRKCD, PLCB1, STX16 |
| Role of NFAT in Cardiac Hypertrophy | 2.55          | 0.0619 | MAP2K6, PIK3C2B, PIK3CA, ITPR2, MAPK12, MAPK11, GNG7, EP300, RCAN1, GNB3, PRKCD, PLCB1, ADCY7                           |
| Role of Tissue Factor in Cancer     | 2.34          | 0.0789 | PIK3C2B, PIK3CA, ARRB2, ITGAV, PLCB1, MAPK12, CSF2, MAPK11, PDXP                                                        |
| Propanoate Metabolism               | 2.25          | 0.0492 | ALDH1B1, ACADVL, PCCA, SUCLG2, ALDH1A3, ACSS1                                                                           |
| CCR3 Signaling in Eosinophils       | 2.21          | 0.0714 | PIK3C2B, PIK3CA, GNB3, ITPR2, PRKCD, PLCB1, MAPK12, MAPK11, GNG7                                                        |

**Branch 6 (upregulated genes in EPCR<sup>+</sup> cells): No results.****Branch 7 (upregulated genes in EPCR<sup>-</sup> cells): Top 5 Canonical Pathways**

| Ingenuity Canonical Pathways                   | -log(p-value) | Ratio  | Molecules                      |
|------------------------------------------------|---------------|--------|--------------------------------|
| Hypoxia Signaling in the Cardiovascular System | 2.39          | 0.0462 | UBE2B, CREB1, UBE2D1           |
| Breast Cancer Regulation by Stathmin1          | 1.8           | 0.0192 | TUBA1A, CAMK1, CDKN1B, PPP2R5E |
| ATM Signaling                                  | 1.48          | 0.0339 | SMC3, CREB1                    |
| Nucleotide Sugars Metabolism                   | 1.41          | 0.0154 | GLCE                           |
| Pathogenesis of Multiple Sclerosis             | 1.35          | 0.111  | CXCL11                         |

**Branch 8 (upregulated genes in EPCR<sup>-</sup> cells): Top 5 Canonical Pathways**

| Ingenuity Canonical Pathways   | -log(p-value) | Ratio  | Molecules                                                                                                                                                                                                                                                      |
|--------------------------------|---------------|--------|----------------------------------------------------------------------------------------------------------------------------------------------------------------------------------------------------------------------------------------------------------------|
| Molecular Mechanisms of Cancer | 6.09          | 0.0899 | MAP2K4, RAP2B, RAP2A, BAD, BMP2, NFKBIE, TAB2, HRAS, HIF1A, FZD1, E2F3, CCND1, TGFBR2, PTK2 (includes EG:14083), CASP6, GNA15, RHOD, E2F5, FZD2, LRP5, CDKN2D, PRKAR2A, ARHGEF17, RHOJ, BAK1, BCL2L1, FZD8, FOS, MAPK14, CCND2, IRS1, CDKN1A, PRKAG2, ARHGEF18 |
| O-Glycan Biosynthesis          | 5.65          | 0.2    | GALNT5, GALNTL4, GALNT14, ST6GALNAC5, GALNT1, C1GALT1, GALNT6, GALNT10, FUT4                                                                                                                                                                                   |
| IGF-1 Signaling                | 4.47          | 0.132  | RPS6KB1, BAD, SOCS2, SOCS6, PRKAR2A, HRAS, IGFBP7, GRB10, PTK2 (includes EG:14083), FOS, IRS1, PRKAG2, IRS2, CYR61                                                                                                                                             |
| ILK Signaling                  | 3.8           | 0.099  | MAP2K4, MYH10, FLNB, PPP2CA, BMP2, PPP2R5D, PPP2R3B, RHOJ, HIF1A, CCND1, PGF, PTEN, PTK2 (includes EG:14083), FOS, RHOD, IRS1, SNAI2, PPP1R12A, IRS2                                                                                                           |
| CDK5 Signaling                 | 3.77          | 0.128  | PPP1CC, LAMA5, PPP2CA, PPP2R5D, EGR1, ITGA2, PRKAR2A, PRKAG2, PPP1R12A, HRAS, PPP2R3B, NGF                                                                                                                                                                     |

**Branch 9 (upregulated genes in EPCR<sup>-</sup> cells): Top Canonical Pathways**

| Ingenuity Canonical Pathways | -log(p-value) | Ratio  | Molecules                               |
|------------------------------|---------------|--------|-----------------------------------------|
| FXR/RXR Activation           | 2.2           | 0.0297 | IL18 (includes EG:16173), FBP1, SLCO1B3 |

| Ingenuity Canonical Pathways                   | -log(p-value) | Ratio  | Molecules                           |
|------------------------------------------------|---------------|--------|-------------------------------------|
| Hypoxia Signaling in the Cardiovascular System | 1.5           | 0.0308 | EDN1, UBE2E2                        |
| PXR/RXR Activation                             | 1.45          | 0.0227 | IGFBP1 (includes EG:16006), SLCO1B3 |
| Leukocyte Extravasation Signaling              | 1.3           | 0.0151 | CXCR4, CYBA, NCF2                   |

**Branch 10 (upregulated genes in EPCR<sup>-</sup> cells): Top 5 Canonical Pathways**

| Ingenuity Canonical Pathways                        | -log(p-value) | Ratio  | Molecules                                           |
|-----------------------------------------------------|---------------|--------|-----------------------------------------------------|
| Role of Tissue Factor in Cancer                     | 3.76          | 0.0702 | FYN, CTGF, CXCL1, HBEGF, MAPK13, F3, EGFR, FGF5     |
| Hepatic Fibrosis / Hepatic Stellate Cell Activation | 3.03          | 0.0544 | IGFBP4, IL1A, CTGF, FGFR1, IGFBP3, IL6, PDGFC, EGFR |
| Coagulation System                                  | 2.82          | 0.105  | THBD, SERPINE1, F3, PLAT                            |
| Nitrogen Metabolism                                 | 2.77          | 0.0333 | MARC2, LOXL1, CA12, CTH                             |
| HMGB1 Signaling                                     | 2.63          | 0.06   | IL1A, MAPK13, SERPINE1, RHOF, FNBP1, PLAT           |

**B Ingenuity analysis of gene signatures defining subpopulations of skin cancer stem cells regulated by TGF- $\beta$  and integrin signaling:** Gene lists from Schober M, *et al.* (2011) *PNAS* 108:10544-10549 with more than average 1.5-fold changes between CD34<sup>+</sup> vs. CD34<sup>-</sup> skin carcinoma populations deficient in TGF- $\beta$  receptor II (TGFBR2) or focal adhesion kinase (FAK) were included in the analysis. Gene lists with up- and down-regulation were considered separately (cutoff of  $p \leq 0.05$  (1.3)).

| Branch 1              | -log(p-value) | Ratio  | Molecules                                                    |
|-----------------------|---------------|--------|--------------------------------------------------------------|
| TGFBR2-KO upregulated | 2.05          | 0.0413 | TRIP13, ID2, TGFBI, SLC14A1, FAM129A, ADA, BLM, CENPH, ESCO2 |

| Branch 2                | -log(p-value) | Ratio  | Molecules                                                                                  |
|-------------------------|---------------|--------|--------------------------------------------------------------------------------------------|
| TGFBR2-KO downregulated | 3.03          | 0.0346 | COL16A1, FAM176B, WIPF1, FN1, ZBTB20, BAMBI, CSGALNACT1, GBP2 (includes EG:14469), SMARCD3 |

| Branch 3                | -log(p-value) | Ratio  | Molecules                                                    |
|-------------------------|---------------|--------|--------------------------------------------------------------|
| TGFBR2-KO downregulated | 4.24          | 0.0231 | VCAM1, SPP1 (includes EG:20750), C3, KCNJ15, NUPR1, ARHGEF25 |
| FAK-KO upregulated      | 3.1           | 0.027  | COL5A2, VCAM1, SPP1 (includes EG:20750), C3                  |

| Branch 4                | -log(p-value) | Ratio  | Molecules                                   |
|-------------------------|---------------|--------|---------------------------------------------|
| FAK-KO upregulated      | 5.29          | 0.0405 | CCL2, HLA-DQA1, MGP, POSTN, HLA-DRB1, GPNMB |
| TGFBR2-KO upregulated   | 1.66          | 0.0138 | ACP5, S100A3, HLA-DQA1                      |
| TGFBR2-KO downregulated | 1.44          | 0.0115 | MGP, HLA-DRB1, GPNMB                        |

| Branch 5              | -log(p-value) | Ratio  | Molecules                                                                                                                                  |
|-----------------------|---------------|--------|--------------------------------------------------------------------------------------------------------------------------------------------|
| TGFBR2-KO upregulated | 2.45          | 0.0642 | MAP2K6, CENPM, SRD5A1, SPC25 (includes EG:100144563), TTK, NCAPD2, DONSON, NEK2, DSCC1, SHMT1, RAD51C, EXO1 (includes EG:26909), E2F8, TK1 |

  

| Branch 8                | -log(p-value) | Ratio  | Molecules                                                                                                                                                         |
|-------------------------|---------------|--------|-------------------------------------------------------------------------------------------------------------------------------------------------------------------|
| TGFBR2-KO downregulated | 3.04          | 0.0769 | SOX4, FHL1 (includes EG:14199), MMP14, FAM43A, ANGPTL2, SLC35F3, FZD1, NFKBIZ, AXL, PLXND1, RNASE4, SEPP1, TGM2, TGFBR2, LIFR, LGMN, RGS10, SLC9A3R2, HEBP2, KLF2 |
| FAK-KO upregulated      | 1.6           | 0.0743 | SEPP1, TGM2, CH25H, CCND2, NFKBIE, FAM43A, CHKA, CD14, RHOJ, NFKBIZ, CCDC80                                                                                       |

  

| Branch 9                | -log(p-value) | Ratio  | Molecules                                            |
|-------------------------|---------------|--------|------------------------------------------------------|
| TGFBR2-KO downregulated | 5.19          | 0.0308 | EDN1, CXCR4, RGCC, ZEB1, EFEMP1, CXCL2, INHBB, MECOM |
| FAK-KO upregulated      | 3.45          | 0.0338 | CXCR4, CYBA, RGCC, EFEMP1, CXCL2                     |

  

| Branch 10               | -log(p-value) | Ratio  | Molecules                                                                                                                        |
|-------------------------|---------------|--------|----------------------------------------------------------------------------------------------------------------------------------|
| TGFBR2-KO downregulated | 5.22          | 0.0577 | FCGRT, FYN, RGS2 (includes EG:19735), LAPTM5, IFI27, CXCL1, SLIT2, ARHGDIB, RRAGD, COL5A1, FSTL1, TTC28, CYP4V2, SERPINE1, PLAC8 |
| FAK-KO upregulated      | 3.02          | 0.0541 | COL5A1, ITGB2, FSTL1, RGS2 (includes EG:19735), LAPTM5, LOXL1, CXCL1, PLAC8                                                      |
| FAK-KO downregulated    | 1.76          | 0.133  | FHIT, GNAI1                                                                                                                      |

**C Test for enrichment of stem cell and EMT signatures:** The individual branches were analyzed through the use of IPA (Ingenuity® Systems, [www.ingenuity.com](http://www.ingenuity.com)) for enrichment of the 40- and 380-gene embryonic stem cell-like signatures, and 654-gene PRC2 signature described by Ben-Porath *et al.* (2008) *Nature Genetics* 40:499-507. Results with a p value of 0.05 (1.3) are shown. We found a significant representation of targets for the Polycomb Repressive Complex 2 (PRC2) that are silenced in embryonic stem cells in Branch 3 of genes upregulated in EPCR<sup>+</sup> cells, whereas the transcripts of the signature of human embryonic stem cells (hESC 380) were represented in cluster 7 and 8 of genes upregulated in EPCR<sup>-</sup> cells. The recently identified mammary stem cell marker and developmental driver, Sox9 (Guo W *et al.* (2012) *Cell* 148: 1015-1028) was differentially expressed at the mRNA, but not the protein level and appeared to be rather regulated by post-translational mechanisms (see Supplementary Fig. 2D). A 64 gene EMT signature (Anastassiou D, et al. (2011) "Human cancer cells express Slug-based epithelial-

mesenchymal transition gene expression signature obtained in vivo." *BMC Cancer* 11:529) was also represented in both EPCR<sup>+</sup> and EPCR<sup>-</sup> subpopulations (cut-off,  $p \leq 0.05$ ).

| <b>Branch 3</b>            | <b>-log(p-value)</b> | <b>Ratio</b> | <b>Molecules</b>                   |
|----------------------------|----------------------|--------------|------------------------------------|
| Anastassiou: EMT signature | 1.85                 | 0.0317       | COL1A2, COL5A2                     |
| Ben-Porath: PRC2 654       | 1.61                 | 0.00776      | OLIG2, HOXB6, DNAJC22, IRX5, HOXC4 |

  

| <b>Branch 4</b>            | <b>-log(p-value)</b> | <b>Ratio</b> | <b>Molecules</b>                      |
|----------------------------|----------------------|--------------|---------------------------------------|
| Anastassiou: EMT signature | 3.02                 | 0.0476       | POSTN, SPARC, FAP (includes EG:14089) |

  

| <b>Branch 7</b>      | <b>-log(p-value)</b> | <b>Ratio</b> | <b>Molecules</b>                                |
|----------------------|----------------------|--------------|-------------------------------------------------|
| Ben-Porath: hESC 380 | 2.74                 | 0.0185       | HELLS, BMPR1A, GINS4, MAT2A, WDHD1, FRAT2, DSG2 |

  

| <b>Branch 8</b>      | <b>-log(p-value)</b> | <b>Ratio</b> | <b>Molecules</b>                                                                                                                                                                                 |
|----------------------|----------------------|--------------|--------------------------------------------------------------------------------------------------------------------------------------------------------------------------------------------------|
| Ben-Porath: hESC 380 | 1.41                 | 0.058        | PLA2G16, DEK, DLGAP5, PODXL, SORL1, CHST7, POLE2, HMGA1, SLC38A1, KLHL7, SPRY4, MRS2 (includes EG:380836), USP44, GMNN, JARID2, DNAJB6, TMPO, HOMER1, NFYB, UNG, BUB3 (includes EG:12237), HMGB3 |

  

| <b>Branch 10</b>           | <b>-log(p-value)</b> | <b>Ratio</b> | <b>Molecules</b>                               |
|----------------------------|----------------------|--------------|------------------------------------------------|
| Anastassiou: EMT signature | 1.94                 | 0.0635       | COL5A1, LOX (includes EG:16948), COL6A3, CDH11 |
