# Supplementary material for: Endothelial Protein C Receptor Function in Murine and Human Breast Cancer Development
Source: PubMed Central journal article supplement (PMC3621887; doi:10.1371/journal.pone.0061071), 2013-04-09
Supplement: pone.0061071.s006.pdf [file pone.0061071.s006.pdf]

**Table S3: Primers used for RT-PCR analysis of PyMT murine tumor samples**

---

|               | Forward                  | Reverse                   |
|---------------|--------------------------|---------------------------|
| $\beta$ actin | 5'ACGGCCAGGTCAATCACTATTG | 5'CCAAGAAGGAAGGCTGGAAAA   |
| CD11c         | 5'CCGTCTGAGTACCCGGGCCAT  | 5'TCCTCCACACAGGCCGGGAG    |
| EPCR          | 5'CTGGTGTGGCCGTGGGCATC   | 5'TGGGGGAGTCTGTTTGGCGTCA  |
| F7            | 5'CCGTCTCCCCGTAGCTGCCT   | 5'TGCGGCACAATTCACGTGTCCT  |
| F10           | 5'TTCCGGATGAACGTGGCCCCT  | 5'ATGCGTGCGTCCAAAACCGCT   |
| PAR1          | 5'TGCTGTCTTCCCGCGTCCCT   | 5'GAGCGGGGGTTCACCGTAGC    |
| PAR2          | 5'TGCAGCCGGACCGAGAACCT   | 5'AGCCTGGTTCTACCGGAACCCC  |
| Protein C     | 5'CCGCATCCCTTTGGTTGCTCGA | 5'TGCCTGCACACAGCATGTTCTCC |
| TF            | 5'TCAAGCACGGGAAAGAAAAC   | 5'CTGCTTCCCTGGGCTATTTTG   |
| ST14          | 5'CTGACCGGCGACATCCTGGC   | 5'TGTTGGGCGGGTAGTGGCCT    |

---
