# Supplementary material for: Endothelial Protein C Receptor Function in Murine and Human Breast Cancer Development
Source: PLoS One. 2013 Apr 9;8(4):e61071. doi: 10.1371/journal.pone.0061071 (PMC3621887; doi:10.1371/journal.pone.0061071)
Supplement: Table S1 — Gene list of differentially expressed transcripts between EPCR+/TFlow and EPCR−/TFhigh subpopulations of MDA-MB-231mfp cells. (PDF) [file pone.0061071.s004.pdf]

Table S1: Hierarchical Clustering of differentially regulated Genes of MDA-MB-231mfp Subpopulations

| idx       | ENTREZID | ENSEMBL    | SYMBOL   | GENENAME                                               | GENEFAM | IN | ICalls | PROBENUS | EPCR+ p19 | EPCR+ p20 | EPCR+ p21 | EPCR+ p22 | EPCR+ p25 | AveExpr  | F        | P.Value  | adj.P.Val | Branch ID |
|-----------|----------|------------|----------|--------------------------------------------------------|---------|----|--------|----------|-----------|-----------|-----------|-----------|-----------|----------|----------|----------|-----------|-----------|
| 2878_at   | 2878     | ENSG000001 | GPX3     | glutathione S-transferase                              | Sec     | I  |        | 21       | 1.882051  | 1.976069  | 2.450996  | 2.284756  | 2.068606  | 5.352009 | 249.748  | 4.30E-08 | 3.23E-06  | 10        |
| 23331_at  | 23331    | ENSG000001 | TTC28    | tetratricopeptide repeat                               | Sec     | I  |        | 22       | 2.101657  | 1.95521   | 2.399771  | 2.175753  | 1.978505  | 4.969621 | 140.6354 | 3.56E-07 | 1.05E-05  | 10        |
| 4217_at   | 4217     | ENSG000001 | MAP3K5   | mitogen-activated protein kinase                       | Sec     | I  |        | 20       | 1.894096  | 1.948599  | 2.394588  | 2.127352  | 2.280811  | 4.736338 | 353.2894 | 1.19E-08 | 1.71E-06  | 10        |
| 5552_at   | 5552     | ENSG000001 | SRGN     | serglycin                                              | Sec     | I  |        | 11       | 1.652524  | 2.000519  | 2.295417  | 2.10926   | 2.120165  | 10.66335 | 99.70631 | 1.25E-06 | 2.37E-05  | 10        |
| 54509_at  | 54509    | ENSG000001 | RHO      | ras homolog GTPase                                     | Sec     | I  |        | 31       | 1.877342  | 2.406128  | 2.400662  | 2.358891  | 1.900386  | 5.431256 | 176.4253 | 1.55E-07 | 6.55E-06  | 10        |
| 9123_at   | 9123     | ENSG000001 | SLC16A3  | solute carrier family 16 member 3                      | Sec     | I  |        | 33       | 1.752751  | 2.291857  | 2.38003   | 2.276583  | 1.967203  | 7.826786 | 370.1627 | 1.00E-08 | 1.58E-06  | 10        |
| 23708_at  | 23708    | ENSG000001 | GSP2     | G1 to S phase GTPase                                   | Sec     | I  |        | 33       | 1.799493  | 2.224381  | 2.518536  | 2.374728  | 2.150831  | 4.865189 | 619.5156 | 1.49E-09 | 9.95E-07  | 10        |
| 57722_at  | 57722    | ENSG000001 | IGDCC4   | immunoglobulin domain                                  | Sec     | I  |        | 22       | 1.879672  | 1.822554  | 2.18965   | 2.427787  | 1.897253  | 5.773273 | 54.79024 | 1.09E-05 | 0.000105  | 10        |
| 3909_at   | 3909     | ENSG000001 | LAMA3    | laminin, alpha 3                                       | Sec     | I  |        | 10       | 1.819348  | 1.945491  | 2.093124  | 2.301039  | 2.019042  | 5.206345 | 310.0272 | 1.93E-08 | 1.99E-06  | 10        |
| 1028_at   | 1028     | ENSG000001 | CDKN1C   | cyclin-dependent kinase 1                              | Sec     | I  |        | 28       | 1.553174  | 1.85132   | 2.182578  | 2.457416  | 2.071522  | 5.538969 | 181.9266 | 1.38E-07 | 6.18E-06  | 10        |
| 9663_at   | 9663     | ENSG000001 | LPIN2    | lipin 2                                                | Sec     | I  |        | 31       | 1.772101  | 1.899806  | 2.357335  | 2.462232  | 2.51464   | 7.000569 | 253.3469 | 4.08E-08 | 3.11E-06  | 10        |
| 1848_at   | 1848     | ENSG000001 | DUSP6    | dual specific phosphatase 6                            | Sec     | I  |        | 43       | 1.620365  | 1.801551  | 2.419639  | 2.365645  | 2.436243  | 10.56327 | 201.8622 | 9.42E-08 | 5.13E-06  | 10        |
| 54855_at  | 54855    | ENSG000001 | FAM46C   | family with sequence similarity 46C                    | Sec     | I  |        | 32       | 1.83125   | 1.829013  | 2.634877  | 2.402335  | 2.486316  | 5.505438 | 109.9032 | 8.77E-07 | 1.92E-05  | 10        |
| 9976_at   | 9976     | ENSG000001 | CLEC2B   | C-type lectin domain class B member 2                  | Sec     | I  |        | 20       | 2.099911  | 1.993932  | 2.400581  | 2.349066  | 2.503854  | 5.29656  | 207.0912 | 8.57E-08 | 4.79E-06  | 10        |
| 627_at    | 627      | ENSG000001 | BDNF     | brain-derived neurotrophic factor                      | Sec     | I  |        | 55       | 2.219673  | 2.067497  | 2.394558  | 2.196875  | 2.292128  | 5.028747 | 335.2863 | 1.45E-08 | 1.76E-06  | 10        |
| 27086_at  | 27086    | ENSG000001 | FOX1     | forkhead box P1                                        | Sec     | I  |        | 123      | 1.761258  | 2.117966  | 2.114186  | 2.194834  | 2.532741  | 6.217665 | 433.1439 | 5.62E-09 | 1.23E-06  | 10        |
| 5318_at   | 5318     | ENSG000001 | PKP2     | plakophilin 2                                          | Sec     | I  |        | 18       | 1.675382  | 2.110726  | 2.252942  | 2.103568  | 2.434656  | 4.518268 | 160.4993 | 2.19E-07 | 7.98E-06  | 10        |
| 9240_at   | 9240     | ENSG000001 | PNMA1    | paraneoplastic antigen 1                               | Sec     | I  |        | 11       | 1.665183  | 2.135962  | 2.286508  | 2.40652   | 2.61731   | 7.997405 | 205.17   | 8.87E-08 | 4.89E-06  | 10        |
| 126433_at | 126433   | ENSG000001 | FBXO27   | F-box protein 27                                       | Sec     | I  |        | 22       | 1.916148  | 2.221166  | 2.407663  | 2.259382  | 2.413008  | 6.711434 | 303.8475 | 2.08E-08 | 2.10E-06  | 10        |
| 58528_at  | 58528    | ENSG000001 | RRAGD    | Ras-related GTP-binding domain                         | Sec     | I  |        | 33       | 1.939038  | 2.239463  | 2.244922  | 2.29448   | 2.401833  | 6.264175 | 134.4854 | 1.49E-07 | 1.17E-05  | 10        |
| 221061_at | 221061   | ENSG000001 | FAM171A1 | family with sequence similarity 171A1                  | Sec     | I  |        | 33       | 1.600653  | 2.403814  | 2.200798  | 2.236771  | 2.386088  | 5.762334 | 225.2701 | 6.29E-08 | 4.03E-06  | 10        |
| 56952_at  | 56952    | ENSG000001 | PRTFDC1  | phosphoribosyl transferase domain class 1              | Sec     | I  |        | 44       | 1.651997  | 2.33971   | 1.985588  | 2.237005  | 2.529441  | 5.05494  | 197.7387 | 1.02E-07 | 5.22E-06  | 10        |
| 10668_at  | 10668    | ENSG000001 | CGRFR1   | cell growth regulator family 1                         | Sec     | I  |        | 20       | 1.666881  | 2.195649  | 1.945687  | 2.104004  | 2.224983  | 6.845102 | 104.6493 | 1.05E-06 | 2.13E-05  | 10        |
| 5029_at   | 5029     | ENSG000001 | P2RY2    | purinergic G-protein-coupled receptor 2                | Sec     | I  |        | 11       | 1.725137  | 1.979237  | 1.91744   | 2.13363   | 2.356481  | 4.481364 | 134.561  | 4.18E-07 | 1.17E-05  | 10        |
| 2295_at   | 2295     | ENSG000001 | FOX2     | forkhead box F2                                        | Sec     | I  |        | 11       | 1.943984  | 2.444394  | 2.040063  | 1.986379  | 2.321482  | 6.412728 | 472.7667 | 4.06E-09 | 1.09E-06  | 10        |
| 26996_at  | 26996    | ENSG000001 | GPR160   | G-protein-coupled receptor 160                         | Sec     | I  |        | 11       | 1.844608  | 2.196468  | 2.099374  | 1.905014  | 2.191081  | 4.883521 | 232.2173 | 5.62E-08 | 3.83E-06  | 10        |
| 29108_at  | 29108    | ENSG000001 | PYCARD   | pyridine nucleotide phosphatase                        | Sec     | I  |        | 22       | 2.244903  | 2.009276  | 2.058257  | 2.029988  | 2.25708   | 5.174709 | 95.59264 | 1.46E-06 | 2.61E-05  | 10        |
| 3775_at   | 3775     | ENSG000001 | KCNK1    | potassium channel family class K member 1              | Sec     | I  |        | 21       | 2.444569  | 2.29563   | 2.424552  | 2.707055  | 2.257702  | 5.841322 | 167.1796 | 1.88E-07 | 7.28E-06  | 10        |
| 3486_at   | 3486     | ENSG000001 | IGFBP3   | insulin-like growth factor binding protein 3           | Sec     | I  |        | 18       | 2.398283  | 2.334988  | 2.437672  | 2.577558  | 2.364452  | 5.478988 | 596.0205 | 1.72E-09 | 9.95E-07  | 10        |
| 286319_at | 286319   | ENSG000001 | TUSC1    | tumor suppressor candidate 1                           | Sec     | I  |        | 11       | 2.280096  | 2.408763  | 2.359254  | 2.710998  | 2.125266  | 5.838743 | 209.7668 | 8.18E-08 | 4.71E-06  | 10        |
| 9435_at   | 9435     | ENSG000001 | CHST2    | carbohydrate (N-acetylglucosaminyl) 6 S-transferase 2  | Sec     | I  |        | 22       | 2.110368  | 2.31632   | 2.373515  | 2.541459  | 2.261917  | 5.189652 | 185.2346 | 1.29E-07 | 5.92E-06  | 10        |
| 91752_at  | 91752    | ENSG000001 | ZNF804A  | zinc finger protein 804A                               | Sec     | I  |        | 11       | 2.469431  | 2.365898  | 2.006588  | 2.454768  | 1.957748  | 5.536932 | 212.8361 | 7.75E-08 | 4.54E-06  | 10        |
| 822_at    | 822      | ENSG000001 | CAPG     | capping protein (actin filament) gamma                 | Sec     | I  |        | 25       | 2.06882   | 2.665556  | 2.477321  | 2.790684  | 2.163086  | 8.262298 | 714.435  | 8.80E-10 | 9.95E-07  | 10        |
| 140606_at | 140606   | ENSG000001 | SELM     | selenoprotein                                          | Sec     | I  |        | 9        | 1.952356  | 2.538518  | 2.514561  | 2.569316  | 2.131118  | 5.166477 | 128.8994 | 4.89E-07 | 1.30E-05  | 10        |
| 23641_at  | 23641    | ENSG000001 | LDOC1    | leucine zipper domain containing 1                     | Sec     | I  |        | 11       | 1.965517  | 2.711812  | 2.166099  | 2.896473  | 2.101171  | 5.408447 | 202.976  | 3.23E-08 | 5.04E-06  | 10        |
| 1183_at   | 1183     | ENSG000001 | CLCN4    | chloride channel family class 4 member 4               | Sec     | I  |        | 44       | 2.065301  | 2.461356  | 2.163757  | 2.494663  | 2.36047   | 5.952704 | 164.5667 | 2.00E-07 | 7.50E-06  | 10        |
| 1305_at   | 1305     | ENSG000001 | COL13A1  | collagen, type 13, alpha 1                             | Sec     | I  |        | 30       | 2.014986  | 2.344808  | 2.208862  | 2.400076  | 2.451935  | 10.09902 | 329.202  | 1.55E-08 | 1.80E-06  | 10        |
| 2152_at   | 2152     | ENSG000001 | F3       | coagulation factor III (fibrinogen)                    | Sec     | I  |        | 31       | 1.944798  | 2.535307  | 2.205483  | 2.325356  | 2.29207   | 9.256703 | 441.1653 | 5.25E-09 | 1.23E-06  | 10        |
| 55841_at  | 55841    | ENSG000001 | WWC3     | WWC family member 3                                    | Sec     | I  |        | 27       | 1.87469   | 2.456341  | 2.25652   | 2.653195  | 2.442639  | 6.660052 | 113.9878 | 7.67E-07 | 1.76E-05  | 10        |
| 9749_at   | 9749     | ENSG000001 | PHACTR2  | phosphatase and actin regulator 2                      | Sec     | I  |        | 73       | 2.287502  | 2.455     | 2.159025  | 2.342699  | 2.549989  | 5.582131 | 131.0081 | 4.61E-07 | 1.25E-05  | 10        |
| 2770_at   | 2770     | ENSG000001 | GNAI1    | guanine nucleotide binding protein (G protein) alpha 1 | Sec     | I  |        | 32       | 2.288564  | 2.39625   | 2.17763   | 2.367922  | 2.350062  | 4.751797 | 231.3108 | 5.70E-08 | 3.86E-06  | 10        |
| 8738_at   | 8738     | ENSG000001 | CRADD    | CASPase and peptidase domain containing                | Sec     | I  |        | 31       | 2.111767  | 2.574581  | 2.01708   | 2.496131  | 2.22385   | 8.558798 | 245.0253 | 4.61E-08 | 3.37E-06  | 10        |
| 57636_at  | 57636    | NA         | ARHGAP23 | Rho GTPase activating protein 23                       | Sec     | I  |        | 13       | 2.154279  | 2.128725  | 2.129912  | 2.661571  | 2.736149  | 8.078439 | 521.0293 | 2.83E-09 | 1.03E-06  | 10        |
| 54996_at  | 54996    | ENSG000001 | MOSC2    | MOCO sulphurase C-terminal domain                      | Sec     | I  |        | 10       | 2.279447  | 2.324966  | 2.625295  | 2.526791  | 2.46522   | 5.917101 | 303.2407 | 2.10E-08 | 2.10E-06  | 10        |
| 1009_at   | 1009     | ENSG000001 | CDH11    | cadherin 11, type 2, Olf                               | Sec     | I  |        | 32       | 2.2388    | 2.197274  | 2.588615  | 2.584793  | 2.585934  | 6.095524 | 408.0246 | 7.01E-09 | 1.26E-06  | 10        |
| 3899_at   | 3899     | ENSG000001 | AF3      | AF4/FMR2 family, member 3                              | Sec     | I  |        | 40       | 2.177913  | 2.024298  | 2.746461  | 2.449543  | 2.56774   | 5.000227 | 473.4991 | 4.04E-09 | 1.09E-06  | 10        |
| 51700_at  | 51700    | ENSG000001 | CYB5R2   | cytochrome b5 reductase 2                              | Sec     | I  |        | 11       | 2.106177  | 2.211324  | 2.595878  | 2.90889   | 2.593538  | 5.937367 | 530.5118 | 2.65E-09 | 1.03E-06  | 10        |
| 23564_at  | 23564    | NA         | DDAH2    | dimethylarginine dimethylaminohydrolase 2              | Sec     | I  |        | 9        | 2.127543  | 2.308223  | 2.780863  | 2.74348   | 2.358044  | 7.658115 | 204.8646 | 8.92E-08 | 4.89E-06  | 10        |
| 286499_at | 286499   | ENSG000001 | FAM133A  | family with sequence similarity 133A                   | Sec     | I  |        | 22       | 2.341649  | 2.405141  | 2.834712  | 2.477142  | 2.577798  | 6.541085 | 372.2757 | 9.84E-09 | 1.57E-06  | 10        |
| 55536_at  | 55536    | ENSG000001 | CDCA7L   | cell division cycle associated 7L                      | Sec     | I  |        | 18       | 2.196589  | 2.592046  | 2.595884  | 2.48188   | 2.558022  | 8.404083 | 146.2198 | 3.08E-07 | 9.69E-06  | 10        |
| 203328_at | 203328   | ENSG000001 | SUSD3    | sushi domain containing 3                              | Sec     | I  |        | 11       | 2.505183  | 2.418458  | 2.535936  | 2.313929  | 2.489438  | 5.055084 | 71.00387 | 4.29E-06 | 5.42E-05  | 10        |
| 8706_at   | 8706     | ENSG000001 | B3GALNT1 | beta-1,3-N-acetylgalactosyltransferase 1               | Sec     | I  |        | 33       | 1.745328  | 2.365235  | 1.96189   | 2.099097  | 1.974744  | 5.794603 | 226.4137 | 6.17E-08 | 4.01E-06  | 10        |
| 2260_at   | 2260     | ENSG000001 | FGFR1    | fibroblast growth factor receptor 1                    | Sec     | I  |        | 64       | 1.778525  | 2.317401  | 1.917389  | 2.031755  | 1.989685  | 5.602274 | 666.5751 | 1.04E-08 | 1.60E-06  | 10        |
| 120114_at | 120114   | ENSG000001 | FAT3     | FAT tumor suppressor 3                                 | Sec     | I  |        | 11       | 1.760888  | 2.600863  | 1.848031  | 2.184021  | 2.013271  | 4.609644 | 131.0515 | 4.60E-07 | 1.25E-05  | 10        |
| 51228_at  | 51228    | ENSG000001 | GLTP     | glycolipid transfer protein                            | Sec     | I  |        | 10       | 1.647401  | 2.429961  | 1.708872  | 1.94917   | 1.918417  | 8.637708 | 349.8706 | 1.24E-08 | 1.73E-06  | 10        |
| 57153_at  | 57153    | ENSG000001 | SLC44A2  | solute carrier family 44 member 2                      | Sec     | I  |        | 33       | 1.678711  | 2.406421  | 1.784844  | 1.957232  | 1.703398  | 6.030219 | 179.5708 | 1.45E-07 | 6.27E-06  | 10        |
| 23352_at  | 23352    | ENSG000001 | UBR4     | ubiquitin protein ligase 4                             | Sec     | I  |        | 8        | 1.891976  | 2.458963  | 1.669124  | 2.102439  | 1.679521  | 9.475874 | 193.5112 | 1.10E-07 | 5.41E-06  | 10        |
| 63910_at  | 63910    | ENSG000001 | SLC17A9  | solute carrier family 17 member 9                      | Sec     | I  |        | 11       | 1.837112  | 2.516254  | 2.199938  | 2.386197  | 1.874205  | 5.971372 | 246.1455 | 4.53E-08 | 3.34E-06  | 10        |
| 4005_at   | 4005     | ENSG000001 | LMO2     | LIM domain only 2 (rhomboid 2)                         | Sec     | I  |        | 11       | 1.797737  | 2.468545  | 2.058403  | 2.335912  | 1.777072  | 5.010912 | 94.73938 | 1.51E-06 | 2.67E-05  | 10        |
| 6447_at   | 6447     | ENSG000001 | SCG5     | secretogranin 5                                        | Sec     | I  |        | 10       | 1.820014  | 2.289638  | 1.95339   | 2.509058  | 1.86411   |          |          |          |           |           |

|           |        |                    |                            |   |    |          |          |          |          |          |          |          |          |          |    |
|-----------|--------|--------------------|----------------------------|---|----|----------|----------|----------|----------|----------|----------|----------|----------|----------|----|
| 4489_at   | 4489   | ENSG000001MT1A     | metallothionein 1A         | I | 16 | 2.532907 | 2.112365 | 2.827908 | 1.992546 | 1.796112 | 5.731385 | 155.4188 | 2.46E-07 | 8.39E-06 | 10 |
| 84985_at  | 84985  | ENSG000001FAM83A   | family with sequence s     | I | 22 | 2.496242 | 2.105033 | 2.44945  | 1.766923 | 1.924367 | 5.754253 | 340.7237 | 1.36E-08 | 1.75E-06 | 10 |
| 56935_at  | 56935  | ENSG000001C11orf75 | chromosome 11 open         | I | 27 | 2.378647 | 2.673088 | 2.427008 | 2.361344 | 2.310233 | 5.298667 | 209.9769 | 8.15E-08 | 4.71E-06 | 10 |
| 284406_at | 284406 | ENSG000001ZFP82    | zinc finger protein 82     | I | 11 | 2.280076 | 2.522976 | 2.29086  | 2.315699 | 2.146753 | 5.370483 | 128.7389 | 4.91E-07 | 1.31E-05 | 10 |
| 53358_at  | 53358  | ENSG000001SHC3     | SHC (Src homology 2 d      | I | 10 | 2.268492 | 2.601766 | 2.681687 | 2.276866 | 2.146727 | 5.328384 | 92.40584 | 1.65E-06 | 2.85E-05 | 10 |
| 9353_at   | 9353   | ENSG000001SLIT2    | slit homolo G-protein c    | I | 10 | 2.318689 | 2.972271 | 2.22825  | 2.42144  | 1.75591  | 6.327417 | 41.70165 | 2.90E-05 | 0.000218 | 10 |
| 23286_at  | 23286  | ENSG000001WWC1     | WW and C2 domain cc        | I | 10 | 2.717546 | 2.763234 | 2.044193 | 2.159061 | 2.359371 | 5.21475  | 271.0963 | 1.38E-08 | 2.63E-06 | 10 |
| 90952_at  | 90952  | ENSG000001ESAM     | endothelial Secreted       | I | 11 | 2.239165 | 2.648708 | 2.140234 | 1.720359 | 2.253392 | 7.665703 | 481.5934 | 3.79E-09 | 1.07E-06 | 10 |
| 995_at    | 995    | ENSG000001CDC25C   | cell divisor phosphopr     | I | 21 | 1.908521 | 2.686796 | 1.80918  | 1.701104 | 2.296074 | 5.506459 | 309.1828 | 1.95E-08 | 1.99E-06 | 10 |
| 1366_at   | 1366   | ENSG000001CLDN7    | claudin 7                  | I | 11 | 2.42252  | 3.057707 | 2.733755 | 2.999842 | 2.970088 | 6.153215 | 172.0234 | 1.70E-07 | 6.91E-06 | 10 |
| 1902_at   | 1902   | ENSG000001LPAR1    | lysophosph G-protein c     | I | 44 | 2.349236 | 2.974738 | 2.654074 | 3.110148 | 2.985056 | 6.838745 | 340.7988 | 1.36E-08 | 1.75E-06 | 10 |
| 154_at    | 154    | ENSG000001ADRB2    | adrenergic, G-protein c    | I | 11 | 2.305056 | 3.21701  | 2.734328 | 3.165672 | 3.12905  | 8.870318 | 122.8424 | 5.84E-07 | 1.47E-05 | 10 |
| 730755_at | 730755 | NA LOC730755       | keratin associated prot    | I | 11 | 2.510878 | 3.234097 | 2.585206 | 3.046239 | 2.913146 | 7.155724 | 185.7741 | 1.28E-07 | 5.89E-06 | 10 |
| 9060_at   | 9060   | ENSG000001PAPSS2   | 3'-phosph kinase           | I | 42 | 2.737338 | 3.077666 | 2.620948 | 3.029169 | 2.678809 | 6.322276 | 159.7974 | 2.22E-07 | 8.02E-06 | 10 |
| 147372_at | 147372 | ENSG000001CCBE1    | collagen and calcium b     | I | 22 | 2.772541 | 2.92163  | 2.595653 | 2.799355 | 2.540211 | 5.062028 | 327.3268 | 1.58E-08 | 1.80E-06 | 10 |
| 652_at    | 652    | ENSG000001BMP4     | bone morp Secreted         | I | 11 | 2.639677 | 2.950663 | 2.848247 | 2.826472 | 2.918045 | 7.625035 | 370.9011 | 9.97E-09 | 1.58E-06 | 10 |
| 3814_at   | 3814   | ENSG000001KISS1    | KISS-1 met: Secreted       | I | 20 | 2.632259 | 3.026951 | 2.530188 | 2.629317 | 2.756486 | 6.508865 | 102.627  | 1.13E-06 | 2.23E-05 | 10 |
| 5764_at   | 5764   | ENSG000001PTN      | pleiotropi Secreted        | I | 17 | 2.532552 | 2.73335  | 3.082735 | 2.511406 | 3.008821 | 5.977024 | 149.2929 | 2.86E-07 | 9.19E-06 | 10 |
| 3487_at   | 3487   | ENSG000001IGFBP4   | insulin-like Secreted      | I | 42 | 2.355514 | 2.58103  | 3.081358 | 2.580004 | 2.802589 | 6.128376 | 78.12946 | 3.04E-06 | 4.31E-05 | 10 |
| 7923_at   | 7923   | NA HSD17B8         | hydroxyste Secreted        | I | 10 | 2.587209 | 2.887106 | 3.144279 | 2.544821 | 2.681902 | 6.467067 | 497.2406 | 3.37E-09 | 1.03E-06 | 10 |
| 131408_at | 131408 | ENSG000001FAM131A  | family with sequence s     | I | 11 | 2.463861 | 3.147959 | 2.68665  | 3.02356  | 2.318016 | 5.598735 | 191.9363 | 1.13E-07 | 5.51E-06 | 10 |
| 28986_at  | 28986  | ENSG000001MAGEH1   | melanoma antigen fan       | I | 11 | 2.259113 | 3.188713 | 2.840024 | 2.995109 | 2.354562 | 5.602454 | 277.002  | 2.93E-08 | 2.53E-06 | 10 |
| 23180_at  | 23180  | ENSG000001RFTN1    | raftlin, lipid raft linker | I | 22 | 2.36017  | 3.049612 | 2.38119  | 2.781432 | 2.400178 | 6.665372 | 375.7845 | 9.50E-09 | 1.56E-06 | 10 |
| 10468_at  | 10468  | ENSG000001FST      | folistatin Secreted        | I | 31 | 2.137171 | 3.054033 | 2.466842 | 2.746093 | 2.281468 | 7.734078 | 94.98391 | 1.49E-06 | 2.65E-05 | 10 |
| 4016_at   | 4016   | ENSG000001LOXL1    | lysyl oxidas: Secreted     | I | 7  | 2.549538 | 3.299522 | 2.836823 | 2.454615 | 2.240316 | 4.971397 | 101.5156 | 1.17E-06 | 2.28E-05 | 10 |
| 201799_at | 201799 | ENSG000001TMEM154  | transmemt Secreted         | I | 43 | 2.082737 | 2.68754  | 2.412123 | 2.91687  | 2.903634 | 6.49042  | 515.7413 | 2.94E-09 | 1.03E-06 | 10 |
| 397_at    | 397    | ENSG000001ARHGDI   | Rho GDP dissociation i     | I | 22 | 2.060733 | 2.583117 | 2.412438 | 2.901671 | 2.942602 | 8.506669 | 535.2764 | 2.56E-09 | 1.03E-06 | 10 |
| 3429_at   | 3429   | ENSG000001IFI27    | interferon, alpha-induc    | I | 14 | 2.02006  | 2.532159 | 2.569783 | 2.995821 | 2.779739 | 9.460491 | 19.97641 | 0.000373 | 0.001604 | 10 |
| 7580_at   | 7580   | ENSG000001ZNF32    | zinc finger protein 32     | I | 11 | 1.800057 | 2.757522 | 2.435806 | 2.756316 | 2.981347 | 6.998893 | 299.3708 | 2.20E-08 | 2.13E-06 | 10 |
| 2810_at   | 2810   | ENSG000001SFN      | stratifer Secreted         | I | 11 | 2.088555 | 3.003533 | 2.364713 | 2.881913 | 2.758613 | 7.614127 | 386.3009 | 8.58E-09 | 1.47E-06 | 10 |
| 10581_at  | 10581  | ENSG000001IFITM2   | interferon induced tra     | I | 22 | 2.163685 | 2.88174  | 2.307699 | 2.805265 | 2.680453 | 8.95059  | 328.4792 | 1.56E-08 | 1.80E-06 | 10 |
| 5054_at   | 5054   | ENSG000001SERPINE1 | serpin pept peptidase      | I | 30 | 2.201691 | 2.739968 | 2.288157 | 2.771195 | 2.961191 | 8.513335 | 350.9215 | 1.22E-08 | 1.73E-06 | 10 |
| 2621_at   | 2621   | ENSG000001GAS6     | growth arr Secreted        | I | 22 | 2.064627 | 2.632835 | 2.42069  | 2.738814 | 2.543177 | 8.942278 | 423.8548 | 6.09E-09 | 1.23E-06 | 10 |
| 4199_at   | 4199   | ENSG000001ME1      | malic enzyme 1, NADP       | I | 22 | 2.030997 | 2.578712 | 2.38932  | 2.817078 | 2.453065 | 5.849157 | 377.8064 | 9.31E-09 | 1.56E-06 | 10 |
| 7805_at   | 7805   | ENSG000001LAPTM5   | lysosomal protein tran     | I | 21 | 1.959874 | 2.561656 | 2.527386 | 2.960515 | 2.467961 | 7.419736 | 225.7236 | 6.24E-08 | 4.03E-06 | 10 |
| 11167_at  | 11167  | ENSG000001FSTL1    | folistatin-I Secreted      | I | 22 | 1.801306 | 2.483897 | 2.4735   | 2.658103 | 2.63131  | 6.405987 | 550.6025 | 2.31E-09 | 1.03E-06 | 10 |
| 54541_at  | 54541  | ENSG000001DDIT4    | DNA-damage-inducibl        | I | 11 | 1.772624 | 2.425286 | 2.512547 | 2.543053 | 2.678636 | 8.709324 | 581.7727 | 1.88E-09 | 9.95E-07 | 10 |
| 64663_at  | 64663  | ENSG000001SPANXC   | SPANX family, membe        | I | 4  | 2.342604 | 2.4351   | 2.576253 | 3.127598 | 2.675533 | 6.074158 | 129.6572 | 4.79E-07 | 1.29E-05 | 10 |
| 51097_at  | 51097  | ENSG000001SCCPDH   | saccharopine dehydro       | I | 17 | 2.475079 | 2.565393 | 2.56413  | 2.741656 | 2.600691 | 5.873336 | 790.3239 | 6.05E-10 | 9.95E-07 | 10 |
| 1002_at   | 1002   | ENSG000001CDH4     | cadherin 4, type 1, R-c    | I | 9  | 2.55538  | 3.422837 | 1.655367 | 2.189787 | 2.816057 | 5.948013 | 235.4355 | 5.34E-08 | 3.72E-06 | 10 |
| 586_at    | 586    | ENSG000001BCAT1    | branched chain amino-      | I | 53 | 1.415958 | 1.932823 | 1.539551 | 1.995204 | 1.591213 | 4.597398 | 108.3487 | 9.23E-07 | 1.99E-05 | 10 |
| 285440_at | 285440 | ENSG000001CYP4V2   | cytochrome P450, fam       | I | 22 | 1.300751 | 1.770808 | 1.460776 | 1.86576  | 1.567145 | 5.115025 | 173.2661 | 1.65E-07 | 6.81E-06 | 10 |
| 2217_at   | 2217   | ENSG000001FCGRT    | Fc fragment of IgG, rec    | I | 34 | 1.529589 | 1.762852 | 1.525853 | 1.855798 | 1.47086  | 7.266198 | 286.2063 | 2.60E-08 | 2.34E-06 | 10 |
| 5532_at   | 5532   | ENSG000001PPP3CB   | protein phn phosphor       | I | 22 | 1.418369 | 1.837717 | 1.856962 | 1.785121 | 1.691471 | 7.305341 | 98.77462 | 1.29E-06 | 2.41E-05 | 10 |
| 8507_at   | 8507   | ENSG000001ENC1     | ectodermal-neural cor      | I | 22 | 1.497736 | 1.811343 | 1.473575 | 1.772801 | 1.742102 | 8.374233 | 229.37   | 5.88E-08 | 3.90E-06 | 10 |
| 1364_at   | 1364   | ENSG000001CLDN4    | claudin 4                  | I | 33 | 1.629275 | 1.794638 | 1.615881 | 2.216297 | 1.899469 | 5.887257 | 170.1891 | 1.76E-07 | 7.03E-06 | 10 |
| 54681_at  | 54681  | ENSG000001P4HTM    | prolyl 4-hydroxylase, t    | I | 30 | 1.51163  | 1.635819 | 1.586073 | 2.124913 | 1.791502 | 5.067462 | 297.8959 | 2.24E-08 | 2.15E-06 | 10 |
| 6286_at   | 6286   | ENSG000001S100P    | S100 calcium binding       | I | 11 | 1.816518 | 1.951182 | 1.709337 | 1.677933 | 1.24681  | 5.178219 | 20.26795 | 0.000356 | 0.00154  | 10 |
| 64838_at  | 64838  | ENSG000001FNDC4    | fibronectin type III do    | I | 11 | 1.828137 | 1.880294 | 1.834301 | 1.930835 | 1.28525  | 5.583785 | 148.1797 | 2.93E-07 | 9.35E-06 | 10 |
| 10810_at  | 10810  | ENSG000001WASF3    | WAS protein family, m      | I | 31 | 1.842822 | 2.108636 | 1.88498  | 2.053154 | 1.471389 | 6.338954 | 161.4307 | 2.14E-07 | 7.88E-06 | 10 |
| 1662_at   | 1662   | ENSG000001DDX10    | DEAD (Asp-Glu-Ala-As       | I | 5  | 1.720086 | 1.777404 | 1.793269 | 2.064526 | 1.70511  | 9.811626 | 180.5717 | 1.42E-07 | 6.21E-06 | 10 |
| 4609_at   | 4609   | ENSG000001MYC      | v-myc myelocytomato        | I | 11 | 1.762738 | 1.600127 | 1.753629 | 1.876925 | 1.697734 | 10.71957 | 50.89067 | 1.42E-05 | 0.000128 | 10 |
| 5327_at   | 5327   | ENSG000001PLAT     | plasminoge peptidase       | I | 75 | 1.472443 | 1.697218 | 1.96765  | 1.915745 | 1.445105 | 9.374472 | 239.7895 | 4.99E-08 | 3.54E-06 | 10 |
| 6304_at   | 6304   | ENSG000001SATB1    | SATB homeobox 1            | I | 32 | 1.308841 | 1.721929 | 1.643333 | 1.739883 | 1.425774 | 5.149793 | 783.1439 | 1.35E-07 | 6.10E-06 | 10 |
| 25803_at  | 25803  | ENSG000001SPDEF    | SAM pointed domain c       | I | 32 | 1.201035 | 1.79371  | 1.63533  | 1.824321 | 1.326737 | 5.390917 | 19.87271 | 1.81E-06 | 4.08E-05 | 10 |
| 2919_at   | 2919   | ENSG000001CXCL1    | chemokine Secreted         | I | 27 | 1.20915  | 1.772341 | 1.680816 | 2.013927 | 1.286327 | 6.531462 | 11.09201 | 0.002558 | 0.007899 | 10 |
| 6494_at   | 6494   | ENSG000001SIPA1    | signal-induced prolifer    | I | 11 | 1.257468 | 2.199127 | 1.611869 | 1.818467 | 1.339425 | 5.551759 | 155.941  | 2.43E-07 | 8.31E-06 | 10 |
| 3689_at   | 3689   | ENSG000001ITGB2    | integrin, b: Secreted      | I | 10 | 1.05276  | 1.988813 | 1.886476 | 1.945456 | 1.284045 | 4.409273 | 42.68351 | 2.67E-05 | 0.000205 | 10 |
| 1472_at   | 1472   | ENSG000001CST4     | cystatin S Secreted        | I | 11 | 1.512001 | 1.725985 | 1.920689 | 2.327565 | 1.088706 | 6.693116 | 350.0218 | 1.24E-08 | 1.73E-06 | 10 |
| 10124_at  | 10124  | ENSG000001ARL4A    | ADP-ribosy GTPase          | I | 18 | 1.464368 | 1.674634 | 1.772284 | 1.611916 | 1.646856 | 7.006523 | 142.0452 | 3.43E-07 | 1.02E-05 | 10 |
| 26579_at  | 26579  | ENSG000001MYEOV    | myeloma overexpress        | I | 22 | 1.407121 | 1.77618  | 1.821885 | 1.516852 | 1.634948 | 7.907007 | 105.111  | 1.03E-06 | 2.11E-05 | 10 |
| 5819_at   | 5819   | ENSG000001PVRL2    | poliovirus receptor-rel    | I | 13 | 1.285826 | 1.65538  | 1.852703 | 1.6651   | 1.601475 | 7.525393 | 218.0629 | 7.09E-08 | 4.30E-06 | 10 |
| 23048_at  | 23048  | ENSG000001FBNP1    | formin binding protein     | I | 20 | 1.508305 | 1.538723 | 1.731494 | 1.382895 | 1.599983 | 6.113788 | 163.8532 | 2.03E-07 | 7.59E-06 | 10 |
| 771_at    | 771    | ENSG000001CA12     | carbonic ar Secreted       | I | 44 | 1.438569 | 1.545349 | 2.060787 | 1.544101 | 1.927583 | 4.86164  | 118.8294 | 6.59E-07 | 1.58E-05 | 10 |
| 55612_at  | 55612  | ENSG000001FERMT1   | fermitin family membe      | I | 33 | 1.417813 | 1.662847 | 2.05986  | 1.621613 | 1.746446 | 4.571013 | 299.9337 | 2.19E-08 | 2.13E-06 | 10 |
| 9447_at   | 9447   | ENSG000001AIM2     | absent in melanoma 2       | I | 21 | 1.560396 | 1.406641 | 1.765103 | 1.794018 | 1.643484 | 5.574922 | 109.2064 | 8.97E-07 | 1.96E-05 | 10 |
|           |        |                    |                            |   |    |          |          |          |          |          |          |          |          |          |    |

|           |        |                   |                   |               |   |    |          |          |          |          |          |          |          |          |          |    |
|-----------|--------|-------------------|-------------------|---------------|---|----|----------|----------|----------|----------|----------|----------|----------|----------|----------|----|
| 25796_at  | 25796  | ENSG000001PGLS    | 6-phospho         | Secreted      | I | 9  | 1.584062 | 1.780502 | 1.373854 | 1.657389 | 1.274672 | 9.630291 | 255.6374 | 3.94E-08 | 3.05E-06 | 10 |
| 2534_at   | 2534   | ENSG000001FYN     | FYN oncog         | kinase        | I | 8  | 1.764065 | 1.690045 | 1.548573 | 1.615391 | 1.461001 | 5.862003 | 107.0611 | 9.65E-07 | 2.03E-05 | 10 |
| 84260_at  | 84260  | ENSG000001TCHP    | trichoplein,      | keratin fila  | I | 32 | 1.698073 | 1.702833 | 1.498259 | 1.513064 | 1.612453 | 6.36122  | 204.9613 | 8.90E-08 | 4.89E-06 | 10 |
| 1956_at   | 1956   | ENSG000001EGFR    | epidermal         | kinase        | I | 69 | 1.877883 | 1.845954 | 1.57775  | 1.53397  | 1.621534 | 4.614529 | 232.8723 | 5.56E-08 | 3.81E-06 | 10 |
| 3384_at   | 3384   | ENSG000001ICAM2   | intercellular     | adhesion      | I | 40 | 1.78604  | 1.998611 | 1.113581 | 1.639011 | 1.338134 | 5.013995 | 173.2427 | 1.65E-07 | 6.81E-06 | 10 |
| 3037_at   | 3037   | ENSG000001HAS2    | hyaluronan        | synthase      | I | 32 | 1.691824 | 1.9411   | 1.138059 | 1.425304 | 1.583913 | 4.294039 | 181.5713 | 1.39E-07 | 6.18E-06 | 10 |
| 389432_at | 389432 | ENSG000001SAMD5   | sterile alpha     | motif don     | I | 11 | 1.499806 | 2.081109 | 1.826842 | 1.548623 | 1.45029  | 4.737739 | 48.10449 | 1.74E-05 | 0.00015  | 10 |
| 22936_at  | 22936  | ENSG000001ELL2    | elongation        | factor, RNA   | I | 31 | 1.569894 | 1.894679 | 1.734971 | 1.391167 | 1.306988 | 6.477457 | 293.6822 | 2.36E-08 | 2.22E-06 | 10 |
| 23268_at  | 23268  | ENSG000001DNMBP   | dynamin bi        | Secreted      | I | 21 | 1.555498 | 1.787883 | 1.810427 | 1.649665 | 1.449245 | 6.513716 | 117.3587 | 6.90E-07 | 1.63E-05 | 10 |
| 2272_at   | 2272   | ENSG000001FHIT    | fragile histidine | triad g       | I | 20 | 1.423287 | 1.803885 | 1.773914 | 1.566716 | 1.413466 | 5.254741 | 137.8415 | 3.83E-07 | 1.10E-05 | 10 |
| 5468_at   | 5468   | ENSG000001PPARG   | peroxisome        | G-protein c   | I | 21 | 1.721781 | 2.041694 | 1.658748 | 1.704905 | 1.582559 | 7.142045 | 139.0821 | 3.70E-07 | 1.07E-05 | 10 |
| 282974_at | 282974 | ENSG000001STK32C  | serine/thre       | kinase        | I | 53 | 1.808699 | 2.122677 | 1.598906 | 1.626841 | 1.340681 | 5.65336  | 152.9059 | 2.62E-07 | 8.70E-06 | 10 |
| 55897_at  | 55897  | ENSG000001MESP1   | mesoderm          | posterior     | I | 11 | 1.662149 | 2.06789  | 1.580736 | 1.533352 | 0.994429 | 5.87975  | 227.2552 | 6.09E-08 | 3.98E-06 | 10 |
| 3233_at   | 3233   | ENSG000001HOXD4   | homeobox          | D4            | I | 11 | 1.525313 | 2.065141 | 1.505672 | 1.297042 | 1.107005 | 4.590711 | 83.74451 | 2.36E-06 | 3.64E-05 | 10 |
| 89894_at  | 89894  | ENSG000001TMEM116 | transmembrane     | protei        | I | 11 | 1.742112 | 2.108247 | 1.542978 | 1.954762 | 1.56056  | 6.992421 | 241.6054 | 4.86E-08 | 3.45E-06 | 10 |
| 79041_at  | 79041  | ENSG000001TMEM38A | transmemt         | ion channe    | I | 20 | 1.726621 | 2.066135 | 1.357762 | 1.966661 | 1.644948 | 5.982724 | 283.2701 | 2.70E-08 | 2.41E-06 | 10 |
| 9241_at   | 9241   | ENSG000001NOG     | noggin            | Secreted      | I | 11 | 1.534577 | 2.090683 | 1.393096 | 2.032381 | 1.532741 | 6.189582 | 85.16211 | 2.22E-06 | 3.50E-05 | 10 |
| 1438_at   | 1438   | ENSG000001CSF2RA  | colony            | stimulating   | I | 35 | 1.667302 | 2.315255 | 1.122078 | 1.878912 | 1.304381 | 4.536527 | 37.95701 | 4.04E-05 | 0.00028  | 10 |
| 337876_at | 337876 | ENSG000001CHSY3   | chondroitin       | sulfate syr   | I | 22 | 1.785051 | 2.154882 | 2.169502 | 1.617673 | 1.419416 | 4.509002 | 333.5895 | 1.48E-08 | 1.76E-06 | 10 |
| 3110_at   | 3110   | ENSG000001MNX1    | motor neuron      | and pan       | I | 11 | 1.713077 | 2.223811 | 2.018695 | 1.716483 | 1.403946 | 5.074718 | 63.60734 | 6.39E-06 | 7.19E-05 | 10 |
| 1847_at   | 1847   | ENSG000001DUSP5   | dual specif       | phosphopr     | I | 10 | 1.851631 | 2.109564 | 2.108631 | 1.796571 | 1.554798 | 8.913163 | 159.3019 | 2.25E-07 | 8.07E-06 | 10 |
| 64399_at  | 64399  | ENSG000001HHIP    | hedgehog          | Secreted      | I | 31 | 1.862381 | 2.448402 | 2.241413 | 1.811543 | 1.444494 | 4.913937 | 373.1275 | 9.75E-09 | 1.57E-06 | 10 |
| 5603_at   | 5603   | ENSG000001MAPK13  | mitogen-ac        | kinase        | I | 32 | 1.593789 | 2.43117  | 1.934705 | 1.781661 | 1.354123 | 5.280654 | 121.8311 | 6.01E-07 | 1.50E-05 | 10 |
| 256979_at | 256979 | ENSG000001SUN3    | Sad1 and          | UNC84 dom     | I | 11 | 1.420785 | 2.363018 | 1.930617 | 2.026712 | 1.155444 | 4.354247 | 57.41427 | 9.24E-06 | 9.32E-05 | 10 |
| 6781_at   | 6781   | ENSG000001STC1    | stanniocalc       | Secreted      | I | 44 | 1.656607 | 2.008293 | 2.26156  | 1.496223 | 0.833436 | 7.849447 | 195.0867 | 1.07E-07 | 5.35E-06 | 10 |
| 9034_at   | 9034   | ENSG000001CCRL2   | chemokine         | G-protein c   | I | 22 | 1.722181 | 2.05089  | 1.883529 | 1.432595 | 0.862091 | 7.14971  | 270.9279 | 3.18E-08 | 2.63E-06 | 10 |
| 3552_at   | 3552   | ENSG000001IL1A    | interleukin       | 1, alpha      | I | 11 | 1.048263 | 2.421025 | 1.573068 | 2.277593 | 1.10515  | 5.121143 | 34.62033 | 5.59E-05 | 0.000359 | 10 |
| 64750_at  | 64750  | ENSG000001SMURF2  | SMAD specific     | E3 ubiq       | I | 30 | 1.740292 | 1.802602 | 1.945854 | 2.04649  | 2.119774 | 8.305685 | 425.6629 | 5.99E-09 | 1.23E-06 | 10 |
| 22875_at  | 22875  | ENSG000001ENPP4   | ectonucleo        | tidate        | I | 33 | 1.733802 | 1.776171 | 1.900558 | 2.093434 | 1.90759  | 4.738567 | 52.63839 | 1.26E-05 | 0.000117 | 10 |
| 11259_at  | 11259  | ENSG000001FILIP1L | filamin A         | interacting   | I | 55 | 1.541917 | 1.826883 | 1.951447 | 2.005951 | 2.083064 | 4.950873 | 159.0223 | 2.26E-07 | 8.07E-06 | 10 |
| 11230_at  | 11230  | ENSG000001PRAF2   | PRA1 domain       | family, n     | I | 11 | 1.578524 | 1.872257 | 1.875795 | 2.047192 | 1.980291 | 5.012094 | 243.9273 | 4.69E-08 | 3.39E-06 | 10 |
| 6782_at   | 6782   | ENSG000001HSPA13  | heat shock        | protein 70k   | I | 44 | 1.493854 | 1.563728 | 1.922655 | 2.018225 | 2.048885 | 6.683033 | 153.649  | 2.57E-07 | 8.63E-06 | 10 |
| 10157_at  | 10157  | ENSG000001AASS    | aminoadipate      | -semiald      | I | 40 | 1.561085 | 1.809916 | 1.893716 | 1.772852 | 2.081131 | 5.663735 | 245.9478 | 4.55E-08 | 3.34E-06 | 10 |
| 10614_at  | 10614  | ENSG000001HEXIM1  | hexamethylene     | bis-acc       | I | 53 | 1.473719 | 1.670829 | 1.831574 | 1.814013 | 2.103036 | 7.564332 | 260.7122 | 3.67E-08 | 2.93E-06 | 10 |
| 5074_at   | 5074   | ENSG000001PAWR    | PRKC, apopto      | sis, WT1,     | I | 10 | 1.517651 | 1.79443  | 2.020929 | 1.948237 | 2.243536 | 8.289544 | 236.8517 | 5.23E-08 | 3.68E-06 | 10 |
| 214_at    | 214    | ENSG000001ALCAM   | activated h       | Secreted      | I | 76 | 1.758704 | 1.693354 | 1.897466 | 1.748331 | 2.237996 | 7.123149 | 173.4839 | 1.64E-07 | 6.81E-06 | 10 |
| 51804_at  | 51804  | ENSG000001SIX4    | SIX homeobox      | 4             | I | 11 | 1.760758 | 1.73684  | 1.955513 | 2.03453  | 2.684085 | 7.155414 | 235.5032 | 3.54E-08 | 3.72E-06 | 10 |
| 4131_at   | 4131   | ENSG000001MAP1B   | microtubule       | -associate    | I | 54 | 1.789465 | 1.948316 | 1.661386 | 1.854657 | 2.443306 | 8.000476 | 282.2454 | 2.74E-08 | 2.43E-06 | 10 |
| 1687_at   | 1687   | ENSG000001DFNA5   | deafness,         | autosomal     | I | 11 | 1.349678 | 1.669974 | 1.842609 | 1.763228 | 1.962558 | 7.596715 | 155.1898 | 2.48E-07 | 8.41E-06 | 10 |
| 11329_at  | 11329  | ENSG000001STK38   | serine/thre       | kinase        | I | 11 | 1.350949 | 1.959535 | 1.802561 | 1.750132 | 1.947767 | 9.412633 | 103.0195 | 1.11E-06 | 2.22E-05 | 10 |
| 182_at    | 182    | ENSG000001JAG1    | jagged 1          |               | I | 64 | 1.255509 | 1.662511 | 1.830476 | 1.804908 | 1.946888 | 5.747831 | 175.63   | 1.57E-07 | 6.65E-06 | 10 |
| 6495_at   | 6495   | ENSG000001SIX1    | SIX homeobox      | 1             | I | 33 | 1.135756 | 1.622115 | 1.89485  | 1.685943 | 2.104002 | 6.295378 | 156.922  | 2.38E-07 | 8.18E-06 | 10 |
| 84962_at  | 84962  | ENSG000001JUB     | jub, ajuba        | homolog       | I | 33 | 1.28849  | 1.964855 | 1.931223 | 1.956085 | 2.002734 | 7.736347 | 196.3953 | 1.04E-07 | 5.29E-06 | 10 |
| 51088_at  | 51088  | ENSG000001KLHL5   | kelch-like        | 5 (Drosophil  | I | 26 | 1.380609 | 1.676973 | 1.91444  | 1.940904 | 2.058743 | 6.695932 | 169.2535 | 1.80E-07 | 7.08E-06 | 10 |
| 9510_at   | 9510   | ENSG000001ADAMTS1 | ADAM met          | peptidase     | I | 22 | 1.111192 | 1.69826  | 1.600553 | 2.002279 | 2.067562 | 7.100321 | 20.46548 | 0.000344 | 0.0015   | 10 |
| 10252_at  | 10252  | ENSG000001SPRY1   | sprouty           | homolog 1, an | I | 33 | 0.767234 | 1.5419   | 1.726672 | 2.061413 | 2.204564 | 6.670013 | 172.4015 | 1.68E-07 | 6.87E-06 | 10 |
| 85453_at  | 85453  | ENSG000001TSPYL5  | TSPY-like         | 5             | I | 11 | 0.992471 | 1.440161 | 1.981593 | 2.298762 | 2.13577  | 4.405606 | 346.0467 | 1.29E-08 | 1.73E-06 | 10 |
| 7056_at   | 7056   | ENSG000001THBD    | thrombomodulin    |               | I | 22 | 1.249407 | 2.091246 | 1.953078 | 2.391508 | 2.006792 | 5.302502 | 77.34165 | 3.15E-06 | 4.41E-05 | 10 |
| 8900_at   | 8900   | ENSG000001CCNA1   | cyclin A1         |               | I | 9  | 1.071365 | 2.031782 | 1.911876 | 2.111131 | 1.875847 | 4.952249 | 84.05543 | 2.33E-06 | 3.63E-05 | 10 |
| 3601_at   | 3601   | ENSG000001IL15RA  | interleukin       | Secreted      | I | 27 | 1.811796 | 1.897713 | 2.068878 | 1.909493 | 1.679157 | 5.341852 | 165.2948 | 1.96E-07 | 7.44E-06 | 10 |
| 7464_at   | 7464   | ENSG000001CORO2A  | coronin, actin    | binding       | I | 42 | 1.863561 | 1.859731 | 1.924203 | 1.837951 | 1.693204 | 4.859317 | 114.8876 | 7.45E-07 | 1.72E-05 | 10 |
| 23327_at  | 23327  | ENSG000001NEDD4L  | neuronal          | precursor     | I | 70 | 1.67734  | 1.811216 | 1.994229 | 1.843886 | 1.787372 | 5.947733 | 8.13E-06 | 3.71E-06 | 8.48E-05 | 10 |
| 344558_at | 344558 | ENSG000001SH3RF3  | SH3 domain        | containing    | I | 11 | 1.617324 | 1.950518 | 1.979373 | 1.844327 | 1.551151 | 4.550454 | 177.0766 | 1.53E-07 | 6.53E-06 | 10 |
| 64283_at  | 64283  | ENSG000001RGNEF   | 190 kDa           | guanine nucle | I | 45 | 1.733322 | 2.000526 | 1.806848 | 1.98973  | 1.753363 | 6.781911 | 152.2458 | 2.66E-07 | 8.79E-06 | 10 |
| 2250_at   | 2250   | ENSG000001GFNF5   | fibroblast        | g Secreted    | I | 66 | 1.724054 | 1.91896  | 1.840364 | 1.868198 | 1.843287 | 4.433799 | 168.6574 | 1.82E-07 | 7.13E-06 | 10 |
| 399474_at | 399474 | ENSG000001TMEM200 | transmembrane     | protei        | I | 11 | 1.647213 | 2.210576 | 1.965605 | 1.785474 | 1.830309 | 6.36117  | 415.2341 | 6.57E-09 | 1.25E-06 | 10 |
| 55809_at  | 55809  | ENSG000001TRERF1  | transcriptional   | regulat       | I | 33 | 1.723955 | 2.014671 | 1.849167 | 1.667713 | 1.898885 | 6.599497 | 335.2018 | 1.45E-08 | 1.76E-06 | 10 |
| 9536_at   | 9536   | ENSG000001PTGES   | prostaglandin     | E synth       | I | 32 | 1.723431 | 2.142566 | 1.940541 | 2.134993 | 1.870658 | 6.316672 | 194.581  | 1.08E-07 | 5.35E-06 | 10 |
| 54749_at  | 54749  | ENSG000001EPDR1   | ependymin         | Secreted      | I | 32 | 1.793545 | 2.101174 | 2.052277 | 2.025924 | 1.834084 | 5.090016 | 409.329  | 6.92E-09 | 1.26E-06 | 10 |
| 56034_at  | 56034  | ENSG000001PDGFC   | platelet de       | Secreted      | I | 30 | 1.744734 | 2.112732 | 1.964986 | 1.979375 | 1.688916 | 7.101835 | 338.539  | 1.40E-08 | 1.76E-06 | 10 |
| 285704_at | 285704 | ENSG000001RGMB    | RGM domain        | family, n     | I | 22 | 1.897623 | 2.199917 | 2.165354 | 1.84331  | 1.887717 | 8.194036 | 283.6681 | 2.69E-08 | 2.41E-06 | 10 |
| 4329_at   | 4329   | ENSG000001ALDH6A1 | aldehyde          | dehydrogen    | I | 11 | 1.748744 | 2.230302 | 2.090462 | 1.604432 | 2.019347 | 5.953552 | 156.0421 | 2.43E-07 | 8.30E-06 | 10 |
| 9957_at   | 9957   | ENSG000001HS3ST1  | heparan sulfate   | (gluco        | I | 20 | 2.229189 | 1.929981 | 1.796703 | 1.653829 | 1.598148 | 4.850414 | 60.36152 | 7.71E-06 | 8.17E-05 | 10 |
| 55286_at  | 55286  | ENSG000001C4orf19 | chromosome        | 4 open r      | I | 33 | 2.147056 | 2.056656 | 1.809425 | 1.609034 | 1.513022 | 5.177363 | 115.9489 | 7.21E-07 | 1.68E-05 | 10 |
| 688_at    | 688    | ENSG000001KLF5    | Kruppel-like      | factor 5 (ii  |   |    |          |          |          |          |          |          |          |          |          |    |

|           |        |                     |                          |    |          |          |          |          |          |          |          |          |          |    |
|-----------|--------|---------------------|--------------------------|----|----------|----------|----------|----------|----------|----------|----------|----------|----------|----|
| 1645_at   | 1645   | ENSG000001AKR1C1    | aldo-keto reductase fa   | 22 | 1.463415 | 0.724386 | 2.807692 | 1.987196 | 2.327769 | 5.599958 | 177.7881 | 1.50E-07 | 6.45E-06 | 10 |
| 4072_at   | 4072   | ENSG000001EPCAM     | epithelial cell adhesior | 28 | 1.287291 | 1.417615 | 2.531916 | 1.687855 | 2.158347 | 4.368708 | 137.0118 | 3.91E-07 | 1.12E-05 | 10 |
| 9603_at   | 9603   | ENSG000001NFE2L3    | nuclear fac Secreted     | 12 | 1.276235 | 1.266809 | 2.407089 | 1.874425 | 2.024383 | 6.83419  | 246.5077 | 4.51E-08 | 3.34E-06 | 10 |
| 5920_at   | 5920   | ENSG000001RARRES3   | retinoic acid receptor r | 22 | 1.517701 | 1.424327 | 2.628807 | 1.773292 | 1.887597 | 6.291219 | 64.99178 | 5.91E-06 | 6.84E-05 | 10 |
| 1839_at   | 1839   | ENSG000001HBEGF     | heparin-bir Secreted     | 21 | 2.128572 | 2.317931 | 2.93646  | 2.271769 | 2.352652 | 5.799469 | 578.9511 | 1.92E-09 | 9.95E-07 | 10 |
| 84419_at  | 84419  | ENSG000001C15orf48  | chromosom Secreted       | 7  | 1.969381 | 2.261396 | 2.942491 | 2.622209 | 2.025713 | 6.049874 | 69.93631 | 4.53E-06 | 5.64E-05 | 10 |
| 8743_at   | 8743   | ENSG000001TNFSF10   | tumor necrosis factor (I | 33 | 1.885662 | 1.88458  | 3.217073 | 2.289913 | 2.504551 | 6.177248 | 200.0413 | 9.74E-08 | 5.17E-06 | 10 |
| 5997_at   | 5997   | ENSG000001RGS2      | regulator of G-protein I | 6  | 1.66397  | 2.216503 | 3.123382 | 3.125769 | 1.992393 | 6.089054 | 178.3735 | 1.48E-07 | 6.41E-06 | 10 |
| 5205_at   | 5205   | ENSG000001ATP8B1    | ATPase, an transportel   | 22 | 1.883414 | 2.23712  | 2.713694 | 2.515601 | 2.806252 | 4.948599 | 223.312  | 6.49E-08 | 4.11E-06 | 10 |
| 79710_at  | 79710  | ENSG000001MORC4     | MORC family CW-type I    | 55 | 1.934632 | 2.013933 | 2.695819 | 2.505455 | 2.66774  | 7.115609 | 139.0075 | 3.71E-07 | 1.07E-05 | 10 |
| 10974_at  | 10974  | ENSG000001C10orf116 | chromosome 10 open       | 20 | 1.803165 | 2.142428 | 2.640043 | 2.340547 | 2.502325 | 7.22484  | 165.9484 | 1.94E-07 | 7.40E-06 | 10 |
| 9411_at   | 9411   | ENSG000001ARHGAP29  | Rho GTPase activating    | 55 | 1.744485 | 2.219549 | 2.542097 | 2.575874 | 3.038989 | 7.16233  | 315.6385 | 1.81E-08 | 1.93E-06 | 10 |
| 5366_at   | 5366   | ENSG000001PMAIP1    | phorbol-12-myristate-    | 22 | 1.631223 | 1.94254  | 2.475737 | 2.574501 | 2.954921 | 9.128215 | 225.3113 | 6.28E-08 | 4.03E-06 | 10 |
| 10461_at  | 10461  | ENSG000001MERTK     | c-mer proti kinase       | 11 | 1.55774  | 1.835542 | 1.817103 | 2.699127 | 2.700707 | 4.888868 | 333.1773 | 1.48E-08 | 1.76E-06 | 10 |
| 22998_at  | 22998  | ENSG000001LIMCH1    | LIM and calponin hom     | 91 | 1.413359 | 1.887782 | 1.820074 | 2.400153 | 2.68328  | 7.261604 | 56.08763 | 1.00E-05 | 9.92E-05 | 10 |
| 1490_at   | 1490   | ENSG000001CTGF      | connective Secreted      | 32 | 1.703094 | 2.273717 | 2.335935 | 2.989737 | 3.376233 | 10.68539 | 97.36288 | 1.36E-06 | 2.50E-05 | 10 |
| 5052_at   | 5052   | ENSG000001PRDX1     | peroxiredo Secreted      | 5  | 1.576191 | 2.465339 | 2.563583 | 2.948934 | 3.105367 | 11.41657 | 173.9359 | 1.63E-07 | 6.81E-06 | 10 |
| 10371_at  | 10371  | ENSG000001SEMA3A    | sema domi Secreted       | 22 | 1.496562 | 1.876511 | 2.466825 | 2.611614 | 3.560283 | 7.011568 | 56.50603 | 9.78E-06 | 9.73E-05 | 10 |
| 306_at    | 306    | ENSG000001ANXA3     | annexin A3               | 19 | 1.08368  | 1.391415 | 2.191808 | 2.199731 | 3.347699 | 9.295219 | 104.7349 | 1.05E-06 | 2.13E-05 | 10 |
| 51655_at  | 51655  | ENSG000001RASD1     | RAS, dexan GTPase        | 11 | 0.647403 | 1.434457 | 2.296731 | 2.398807 | 2.940051 | 4.863088 | 306.0047 | 2.03E-08 | 2.06E-06 | 10 |
| 8673_at   | 8673   | ENSG000001VAMP8     | vesicle-associated mer   | 9  | 1.959468 | 2.65894  | 2.704326 | 3.10107  | 3.110434 | 10.8641  | 200.6029 | 9.64E-08 | 5.16E-06 | 9  |
| 10551_at  | 10551  | ENSG000001AGR2      | anterior gr: Secreted    | 14 | 1.871778 | 2.673402 | 2.765025 | 3.082451 | 3.082488 | 7.753647 | 29.08561 | 0.000103 | 0.000578 | 9  |
| 84617_at  | 84617  | ENSG000001TUBB6     | tubulin, be GTPase       | 22 | 1.9392   | 2.714273 | 2.671188 | 3.075373 | 3.241518 | 10.3777  | 403.0241 | 7.33E-09 | 1.31E-06 | 9  |
| 284293_at | 284293 | ENSG000001HMSD      | histocompatibility (mir  | 9  | 2.019779 | 2.823373 | 2.677102 | 2.826367 | 3.132941 | 5.32202  | 233.3139 | 5.52E-08 | 3.80E-06 | 9  |
| 3880_at   | 3880   | ENSG000001KRT19     | keratin 19               | 7  | 2.232891 | 2.903116 | 2.671721 | 3.199351 | 3.093262 | 11.19089 | 521.196  | 2.83E-09 | 1.03E-06 | 9  |
| 5328_at   | 5328   | ENSG000001PLAU      | plasminoge kinase        | 31 | 2.33416  | 2.76602  | 2.798384 | 3.106286 | 3.031368 | 8.208259 | 413.5626 | 6.76E-09 | 1.25E-06 | 9  |
| 83641_at  | 83641  | ENSG000001FAM107B   | family with sequence s   | 49 | 2.359227 | 2.780844 | 2.724611 | 2.804412 | 3.026799 | 6.392804 | 191.9667 | 1.13E-07 | 5.51E-06 | 9  |
| 3087_at   | 3087   | ENSG000001HHEX      | hematopoietically exp    | 11 | 2.249009 | 2.991225 | 2.826884 | 2.731803 | 2.783857 | 4.984548 | 346.9979 | 1.28E-08 | 1.73E-06 | 9  |
| 124220_at | 124220 | ENSG000001ZG16B     | zymogen g: Secreted      | 11 | 1.927346 | 2.695939 | 2.886698 | 2.977584 | 2.720656 | 6.185076 | 725.4468 | 3.81E-10 | 9.95E-07 | 9  |
| 1514_at   | 1514   | ENSG000001CTSL1     | cathepsin L peptidase    | 10 | 2.219948 | 2.910331 | 3.026806 | 3.289818 | 2.961653 | 7.782147 | 341.0806 | 1.36E-08 | 1.75E-06 | 9  |
| 100131187 | 1E+08  | ENSG000001TSTD1     | thiosulfate sulfurtrans  | 11 | 2.243706 | 2.943621 | 3.010931 | 3.123121 | 2.886928 | 5.992403 | 735.9071 | 7.88E-10 | 9.95E-07 | 9  |
| 2920_at   | 2920   | ENSG000001CXCL2     | chemokine Secreted       | 21 | 2.038225 | 2.784281 | 3.095815 | 3.179219 | 3.143548 | 7.127174 | 18.53954 | 0.00048  | 0.001973 | 9  |
| 2122_at   | 2122   | ENSG000001MECOM     | MDS1 and EVI1 compl      | 28 | 2.420888 | 2.755596 | 3.249392 | 2.993391 | 3.037757 | 6.18666  | 251.5393 | 4.19E-08 | 3.17E-06 | 9  |
| 6662_at   | 6662   | ENSG000001SOX9      | SRY (sex determinin g    | 33 | 2.272155 | 2.802511 | 3.165385 | 3.016469 | 3.189607 | 6.163484 | 207.2136 | 8.55E-08 | 4.79E-06 | 9  |
| 3606_at   | 3606   | ENSG000001IL18      | interleukin Secreted     | 10 | 2.039517 | 3.072851 | 3.275489 | 2.989142 | 3.213378 | 6.135723 | 360.3116 | 1.11E-08 | 1.67E-06 | 9  |
| 203413_at | 203413 | ENSG000001CXorf61   | chromosome X open r      | 10 | 2.031887 | 3.100698 | 2.888079 | 2.973345 | 2.999018 | 5.549939 | 333.4725 | 1.48E-08 | 1.76E-06 | 9  |
| 64866_at  | 64866  | ENSG000001CDCP1     | CUB domas Secreted       | 32 | 2.500427 | 2.594892 | 2.865904 | 3.250129 | 3.512214 | 6.649106 | 552.6652 | 2.28E-09 | 1.03E-06 | 9  |
| 217_at    | 217    | ENSG000001ALDH2     | aldehyde dehydrogen: I   | 15 | 2.281711 | 2.620351 | 2.850275 | 3.422208 | 3.419302 | 6.826413 | 407.9406 | 7.01E-09 | 1.26E-06 | 9  |
| 253152_at | 253152 | ENSG000001EPHX4     | epoxide hydrolase 4      | 10 | 2.24743  | 2.768181 | 2.957911 | 2.972619 | 3.462597 | 5.718639 | 389.9828 | 8.28E-09 | 1.44E-06 | 9  |
| 4070_at   | 4070   | ENSG000001TACSTD2   | tumor-associated calci   | 19 | 2.076051 | 2.826632 | 3.151299 | 3.095871 | 3.479457 | 8.328051 | 127.5444 | 5.09E-07 | 1.34E-05 | 9  |
| 8644_at   | 8644   | ENSG000001AKR1C3    | aldo-keto reductase fa   | 9  | 2.315877 | 2.419975 | 3.141757 | 3.273928 | 3.390575 | 8.706746 | 842.3233 | 4.78E-10 | 9.95E-07 | 9  |
| 1469_at   | 1469   | ENSG000001CST1      | cystatin SN Secreted     | 20 | 2.156623 | 2.143122 | 2.984272 | 3.170059 | 3.33834  | 9.751439 | 601.8466 | 1.66E-09 | 9.95E-07 | 9  |
| 3730_at   | 3730   | ENSG000001KAL1      | Kallmann S: Secreted     | 30 | 2.350735 | 2.394065 | 3.027764 | 2.809003 | 3.071217 | 6.735724 | 432.1343 | 5.67E-09 | 1.23E-06 | 9  |
| 115207_at | 115207 | ENSG000001KCTD12    | potassium ion channe     | 55 | 2.1202   | 2.165591 | 3.06315  | 2.604637 | 3.116694 | 5.79001  | 315.7912 | 1.81E-08 | 1.93E-06 | 9  |
| 7980_at   | 7980   | ENSG000001TFPI2     | tissue factr Secreted    | 21 | 1.861525 | 2.375537 | 3.009077 | 2.721512 | 3.355601 | 6.744314 | 71.12236 | 4.27E-06 | 5.41E-05 | 9  |
| 2318_at   | 2318   | ENSG000001FLNC      | filamin C, gamma         | 10 | 2.775759 | 3.026529 | 2.063488 | 3.230394 | 3.413934 | 6.745669 | 277.5584 | 2.91E-08 | 2.53E-06 | 9  |
| 8436_at   | 8436   | ENSG000001SDPR      | serum deprivation res    | 22 | 2.373032 | 3.161217 | 2.372033 | 3.010516 | 3.4753   | 6.066997 | 300.7626 | 2.16E-08 | 2.13E-06 | 9  |
| 3625_at   | 3625   | ENSG000001INHBB     | inhibin, be: Secreted    | 11 | 2.820166 | 3.048747 | 2.644456 | 3.518882 | 3.629602 | 6.143265 | 144.1634 | 3.25E-07 | 9.92E-06 | 9  |
| 7325_at   | 7325   | ENSG000001UBE2E2    | ubiquitin-conjugating    | 11 | 2.32044  | 2.966303 | 3.029567 | 3.337066 | 3.635105 | 6.731678 | 250.4059 | 4.26E-08 | 3.21E-06 | 9  |
| 10653_at  | 10653  | ENSG000001SPINT2    | serine peptidase inhibi  | 22 | 2.23154  | 2.968955 | 2.992759 | 3.417065 | 3.567836 | 9.443787 | 491.0139 | 3.53E-09 | 1.06E-06 | 9  |
| 5646_at   | 5646   | ENSG000001PRSS3     | protease, s peptidase    | 11 | 2.349103 | 2.973605 | 2.953122 | 3.526875 | 3.730371 | 7.2207   | 374.1038 | 9.66E-09 | 1.57E-06 | 9  |
| 5167_at   | 5167   | ENSG000001ENPP1     | ectonucleo Secreted      | 32 | 2.252631 | 2.725484 | 3.044513 | 3.380536 | 3.637053 | 6.952322 | 330.875  | 1.52E-08 | 1.80E-06 | 9  |
| 54863_at  | 54863  | ENSG000001C9orf167  | chromosome 9 open n      | 10 | 2.640522 | 2.932811 | 3.103855 | 3.317482 | 3.565167 | 5.755483 | 98.36714 | 1.31E-06 | 2.43E-05 | 9  |
| 23266_at  | 23266  | ENSG000001LPHN2     | latrophilin G-protein    | 22 | 2.675378 | 2.773882 | 3.216225 | 3.23077  | 3.598772 | 5.744977 | 243.075  | 4.75E-08 | 3.42E-06 | 9  |
| 50486_at  | 50486  | ENSG000001G0S2      | GO/G1swit: Secreted      | 25 | 2.533425 | 3.258073 | 3.250068 | 3.552155 | 3.708109 | 8.731754 | 276.4286 | 2.96E-08 | 2.54E-06 | 9  |
| 1906_at   | 1906   | ENSG000001EDN1      | endothelin Secreted      | 22 | 2.509929 | 3.419125 | 3.240826 | 3.412959 | 3.673648 | 7.280589 | 123.545  | 5.71E-07 | 1.45E-05 | 9  |
| 1535_at   | 1535   | ENSG000001CYBA      | cytochrome b-245, alp    | 11 | 2.433523 | 3.374382 | 3.004344 | 3.426816 | 3.573764 | 8.28901  | 232.0691 | 5.63E-08 | 3.83E-06 | 9  |
| 7837_at   | 7837   | ENSG000001PXDN      | peroxidasin homolog (    | 22 | 2.520559 | 3.222238 | 3.00559  | 3.644309 | 3.897408 | 9.391944 | 138.5342 | 1.75E-08 | 1.92E-06 | 9  |
| 2150_at   | 2150   | ENSG000001F2RL1     | coagulator G-protein     | 16 | 2.522752 | 3.135287 | 3.07989  | 3.676879 | 3.633118 | 6.615476 | 504.0809 | 3.20E-09 | 1.03E-06 | 9  |
| 3484_at   | 3484   | ENSG000001IGFBP1    | insulin-like Secreted    | 11 | 2.154399 | 2.689258 | 3.510275 | 3.405638 | 3.952974 | 9.099388 | 54.50748 | 1.11E-05 | 0.000107 | 9  |
| 137835_at | 137835 | ENSG000001TMEM71    | transmembrane protei     | 11 | 2.232369 | 2.608189 | 3.283936 | 3.61987  | 3.965887 | 6.104667 | 710.3593 | 8.98E-10 | 9.95E-07 | 9  |
| 221395_at | 221395 | ENSG000001GPR116    | G protein-c G-protein    | 27 | 2.505618 | 2.753177 | 3.236779 | 3.659387 | 4.4453   | 8.224266 | 169.7352 | 1.78E-07 | 7.03E-06 | 9  |
| 84707_at  | 84707  | ENSG000001BEX2      | brain expressed X-link   | 11 | 2.07514  | 2.882413 | 3.517019 | 3.068896 | 3.566491 | 7.304559 | 49.76258 | 1.54E-05 | 0.000136 | 9  |
| 9823_at   | 9823   | ENSG000001ARMCX2    | armadillo repeat conta   | 10 | 2.134152 | 2.553876 | 3.216452 | 3.078417 | 3.763889 | 7.657666 | 271.2938 | 3.17E-08 | 2.63E-06 | 9  |
| 5806_at   | 5806   | ENSG000001PTX3      | pentraxin 3 Secreted     | 11 | 1.416479 | 2.716985 | 3.207149 | 3.532305 | 3.646293 | 9.126458 | 97.12617 | 1.38E-06 | 2.51E-05 | 9  |
| 54102_at  | 54102  | ENSG000001CLIC6     | chloride ion ion channe  | 11 | 2.569198 | 2.904606 | 3.611757 | 3.368288 | 3.203175 | 5.436916 | 127.0277 | 1.67E-06 | 1.35E-05 | 9  |
| 54504_at  | 54504  | ENSG000001CPVL      | carboxypep: peptidase    | 11 | 2.660533 | 2.892547 | 3.271163 | 3.420783 | 3.103695 | 6.421536 | 172.794  | 1.67E-07 | 6.84E-06 | 9  |
| 196792_at | 196792 | ENSG000001FAM24B    | family with Secreted     | 8  | 2.471226 | 2.819146 | 3.250468 | 3.413385 | 3.263706 | 7.256153 | 367.4497 | 1.03E-08 | 1.60E    |    |

|           |        |                     |                          |                        |    |          |          |          |          |          |          |          |          |          |          |   |
|-----------|--------|---------------------|--------------------------|------------------------|----|----------|----------|----------|----------|----------|----------|----------|----------|----------|----------|---|
| 10053_at  | 10053  | ENSG000001AP1M2     | adaptor-related protei   | I                      | 7  | 3.052396 | 3.382334 | 3.079545 | 2.978076 | 3.26036  | 5.751808 | 627.9871 | 1.42E-09 | 9.95E-07 | 9        |   |
| 4688_at   | 4688   | ENSG000001NCF2      | neutrophil cytosolic fa  | I                      | 11 | 3.058543 | 2.882183 | 3.169403 | 3.093625 | 2.766256 | 5.354091 | 208.6023 | 8.35E-08 | 4.75E-06 | 9        |   |
| 56938_at  | 56938  | ENSG000001ARNTL2    | aryl hydrocarbon rece    | I                      | 11 | 2.684395 | 2.720946 | 3.149093 | 3.025471 | 2.917807 | 5.183059 | 156.8854 | 2.38E-07 | 8.18E-06 | 9        |   |
| 55228_at  | 55228  | ENSG000001PNMAL1    | PNMA-like Secreted       | I                      | 11 | 2.782727 | 3.495684 | 3.673978 | 3.593309 | 3.478044 | 6.575711 | 603.2322 | 1.65E-09 | 9.95E-07 | 9        |   |
| 79746_at  | 79746  | ENSG000001ECHDC3    | enoyl CoA hydratase d    | I                      | 11 | 2.847387 | 3.356432 | 3.545718 | 3.580035 | 3.392382 | 7.141538 | 274.9518 | 3.01E-08 | 2.57E-06 | 9        |   |
| 26499_at  | 26499  | ENSG000001PLEK2     | pleckstrin 2             | I                      | 11 | 2.565974 | 3.407024 | 3.654112 | 3.546106 | 3.426505 | 7.249385 | 497.4858 | 3.36E-09 | 1.03E-06 | 9        |   |
| 56925_at  | 56925  | ENSG000001LXN       | latexin                  | I                      | 20 | 2.375801 | 3.520952 | 3.779015 | 3.525839 | 3.175714 | 5.814048 | 424.4966 | 6.05E-09 | 1.23E-06 | 9        |   |
| 28234_at  | 28234  | NA                  | SLCO1B3                  | solute carri transport | I  | 9        | 2.72309  | 3.014857 | 4.13671  | 3.489151 | 3.219278 | 6.053568 | 339.8025 | 1.38E-08 | 1.75E-06 | 9 |
| 5867_at   | 5867   | ENSG000001RAB4A     | RAB4A, me GTPase         | I                      | 11 | 2.506062 | 3.238536 | 3.550832 | 3.739659 | 4.167241 | 6.991444 | 206.8629 | 8.61E-08 | 4.80E-06 | 9        |   |
| 1832_at   | 1832   | ENSG000001DSP       | desmoplakin              | I                      | 22 | 2.383509 | 3.217644 | 3.485353 | 3.721763 | 4.084318 | 7.606345 | 219.8117 | 6.88E-08 | 4.27E-06 | 9        |   |
| 94234_at  | 94234  | ENSG000001FOXQ1     | forkhead box Q1          | I                      | 22 | 2.50487  | 3.401061 | 3.353199 | 3.867385 | 4.183252 | 7.340278 | 295.4671 | 2.31E-08 | 2.20E-06 | 9        |   |
| 5654_at   | 5654   | ENSG000001HTRA1     | HtrA serine peptidase    | I                      | 21 | 2.496287 | 3.140725 | 3.360894 | 3.649195 | 4.011483 | 7.231121 | 442.1103 | 5.21E-09 | 1.23E-06 | 9        |   |
| 28984_at  | 28984  | ENSG000001C13orf15  | chromosome 13 open       | I                      | 11 | 2.510907 | 3.065773 | 3.168969 | 3.71567  | 3.950423 | 7.368611 | 129.0407 | 4.87E-07 | 1.30E-05 | 9        |   |
| 170712_at | 170712 | ENSG000001COX7B2    | cytochrome transport     | I                      | 11 | 2.580559 | 3.437197 | 3.192105 | 3.728804 | 3.921506 | 8.257798 | 441.2193 | 5.25E-09 | 1.23E-06 | 9        |   |
| 143903_at | 143903 | ENSG000001LAYN      | layilin                  | I                      | 22 | 2.523124 | 3.411567 | 3.393105 | 3.599146 | 3.869305 | 6.874855 | 160.6073 | 2.18E-07 | 7.98E-06 | 9        |   |
| 2202_at   | 2202   | ENSG000001EFEMP1    | EGF contain Secreted     | I                      | 28 | 2.540309 | 3.475062 | 3.321888 | 3.847915 | 3.795568 | 7.830021 | 823.3675 | 5.20E-10 | 9.95E-07 | 9        |   |
| 27063_at  | 27063  | ENSG000001ANKRD1    | ankyrin repeat domain    | I                      | 11 | 2.870781 | 3.602656 | 2.989719 | 3.747122 | 4.581503 | 9.184807 | 77.81907 | 3.08E-06 | 4.35E-05 | 9        |   |
| 80008_at  | 80008  | ENSG000001TMEM156   | transmembrane protei     | I                      | 11 | 2.851389 | 3.424246 | 3.595771 | 3.580815 | 3.935139 | 6.828588 | 145.3507 | 3.15E-07 | 9.80E-06 | 9        |   |
| 347744_at | 347744 | ENSG000001C6orf52   | chromosome 6 open r      | I                      | 11 | 2.812828 | 3.359404 | 3.666663 | 3.600372 | 3.96973  | 6.472882 | 1021.224 | 2.34E-10 | 9.95E-07 | 9        |   |
| 201161_at | 201161 | ENSG000001CENPV     | centromere protein V     | I                      | 8  | 3.183474 | 3.633103 | 3.532453 | 3.220954 | 3.712922 | 6.584946 | 324.0945 | 1.64E-08 | 1.86E-06 | 9        |   |
| 7852_at   | 7852   | ENSG000001CXCR4     | chemokine G-protein c    | I                      | 44 | 2.534862 | 3.708487 | 3.672144 | 3.696025 | 3.758449 | 7.204409 | 439.8321 | 5.31E-09 | 1.23E-06 | 9        |   |
| 725_at    | 725    | ENSG000001C4BPB     | compleme Secreted        | I                      | 9  | 2.748001 | 3.791249 | 3.542737 | 3.743312 | 3.356686 | 6.743411 | 419.8588 | 6.30E-09 | 1.24E-06 | 9        |   |
| 2203_at   | 2203   | ENSG000001FBP1      | fructose-1,6-bisphosp    | I                      | 8  | 2.636205 | 4.143734 | 3.372977 | 3.878106 | 3.594201 | 7.397449 | 469.7131 | 4.16E-09 | 1.10E-06 | 9        |   |
| 51422_at  | 51422  | ENSG000001PRKAG2    | protein kinase, AMP-a    | I                      | 43 | 1.39829  | 1.487847 | 1.562301 | 1.349022 | 1.478608 | 7.219796 | 99.94471 | 1.24E-06 | 2.36E-05 | 8        |   |
| 29103_at  | 29103  | ENSG000001DNAJC15   | DnaJ (Hsp40) homolog     | I                      | 19 | 1.409396 | 1.491206 | 1.518195 | 1.257252 | 1.281465 | 7.347124 | 99.63314 | 1.25E-06 | 2.37E-05 | 8        |   |
| 81848_at  | 81848  | ENSG000001SPRY4     | sprouty homolog 4 (Dr    | I                      | 22 | 1.185742 | 1.430553 | 1.571862 | 1.361643 | 1.273368 | 5.363039 | 123.6696 | 5.69E-07 | 1.45E-05 | 8        |   |
| 7099_at   | 7099   | ENSG000001TLR4      | toll-like receptor 4     | I                      | 33 | 1.190265 | 1.498071 | 1.519107 | 1.416026 | 1.192228 | 6.111875 | 77.95578 | 3.06E-06 | 4.33E-05 | 8        |   |
| 89927_at  | 89927  | ENSG000001C16orf45  | chromosome 16 open       | I                      | 22 | 1.093803 | 1.451785 | 1.538792 | 1.280513 | 1.349367 | 4.378716 | 83.87179 | 2.35E-06 | 3.63E-05 | 8        |   |
| 132720_at | 132720 | ENSG000001C4orf32   | chromosome 4 open r      | I                      | 11 | 1.089308 | 1.434307 | 1.508557 | 1.213101 | 1.334528 | 6.375249 | 57.71467 | 9.06E-06 | 9.21E-05 | 8        |   |
| 283459_at | 283459 | ENSG000001GATC      | glutamyl-tRNA(Gln) an    | I                      | 7  | 1.153825 | 1.455662 | 1.532741 | 1.134421 | 1.435887 | 4.554789 | 32.7325  | 6.81E-05 | 0.000417 | 8        |   |
| 8321_at   | 8321   | ENSG000001FZD1      | frizzled fan G-protein   | I                      | 22 | 1.258199 | 1.552125 | 1.46016  | 1.390526 | 1.59202  | 5.028443 | 158.2897 | 2.30E-07 | 8.08E-06 | 8        |   |
| 4331_at   | 4331   | ENSG000001MNAT1     | menage a trois homol     | I                      | 11 | 1.104973 | 1.480451 | 1.467639 | 1.438951 | 1.478238 | 8.030237 | 167.1102 | 1.89E-07 | 7.28E-06 | 8        |   |
| 22824_at  | 22824  | ENSG000001HSPA4L    | heat shock 70kDa prot    | I                      | 33 | 1.306696 | 1.206624 | 1.705174 | 1.428221 | 1.4384   | 6.299606 | 130.6702 | 4.65E-07 | 1.26E-05 | 8        |   |
| 4048_at   | 4048   | ENSG000001LTA4H     | leukotriene peptidase    | I                      | 10 | 1.228387 | 1.221361 | 1.494773 | 1.506909 | 1.448454 | 9.69464  | 233.5073 | 5.51E-08 | 3.80E-06 | 8        |   |
| 266812_at | 266812 | ENSG000001NAP1L5    | nucleosome assembly      | I                      | 33 | 1.26665  | 1.330604 | 1.519028 | 1.359234 | 1.467507 | 3.945699 | 126.4364 | 5.25E-07 | 1.36E-05 | 8        |   |
| 259230_at | 259230 | ENSG000001SGMS1     | sphingomy kinase         | I                      | 22 | 1.332144 | 1.238296 | 1.524333 | 1.273908 | 1.417603 | 7.210862 | 96.8051  | 1.39E-06 | 2.54E-05 | 8        |   |
| 50804_at  | 50804  | ENSG000001MYEF2     | myelin expression fact   | I                      | 55 | 1.441604 | 1.278049 | 1.453366 | 1.545408 | 1.322245 | 4.245214 | 89.30469 | 1.87E-06 | 3.07E-05 | 8        |   |
| 81603_at  | 81603  | ENSG000001TRIM8     | tripartite motif contain | I                      | 30 | 1.076263 | 1.365557 | 1.611241 | 1.498431 | 1.379459 | 8.048435 | 165.8413 | 1.94E-07 | 7.40E-06 | 8        |   |
| 558_at    | 558    | ENSG000001AXL       | AXL recept kinase        | I                      | 22 | 0.991457 | 1.322468 | 1.586467 | 1.508462 | 1.34022  | 9.537245 | 199.0072 | 9.93E-08 | 5.18E-06 | 8        |   |
| 84138_at  | 84138  | ENSG000001SLC7A6OS  | solute carrier family 7, | I                      | 11 | 0.952738 | 1.281705 | 1.537224 | 1.600577 | 1.355738 | 5.55701  | 120.9022 | 6.19E-07 | 1.52E-05 | 8        |   |
| 84909_at  | 84909  | ENSG000001C9orf3    | chromosom peptidase      | I                      | 40 | 0.819531 | 1.506234 | 1.41442  | 1.465062 | 1.434177 | 5.755692 | 120.3004 | 6.30E-07 | 1.53E-05 | 8        |   |
| 441150_at | 441150 | ENSG000001C6orf226  | chromosome 6 open r      | I                      | 11 | 1.047061 | 1.41958  | 1.460272 | 1.629707 | 1.316205 | 7.543093 | 69.47046 | 4.65E-06 | 5.73E-05 | 8        |   |
| 2745_at   | 2745   | ENSG000001GLRX      | glutaredoxin (thioltran  | I                      | 14 | 1.044019 | 1.354784 | 1.341298 | 1.699131 | 1.27528  | 8.471149 | 69.44375 | 4.65E-06 | 5.74E-05 | 8        |   |
| 9878_at   | 9878   | ENSG000001TOX4      | TOX high mobility grou   | I                      | 30 | 1.20212  | 1.501029 | 1.305788 | 1.533133 | 1.30841  | 5.670705 | 160.9228 | 2.17E-07 | 7.94E-06 | 8        |   |
| 56951_at  | 56951  | ENSG000001C5orf15   | chromosome 5 open r      | I                      | 17 | 0.994647 | 1.35713  | 1.448946 | 1.651878 | 1.524206 | 7.570902 | 165.7607 | 1.94E-07 | 7.40E-06 | 8        |   |
| 9891_at   | 9891   | ENSG000001NUAK1     | NUAK fami kinase         | I                      | 33 | 1.019665 | 1.22874  | 1.409341 | 1.51988  | 1.551649 | 6.257421 | 100.012  | 1.24E-06 | 2.36E-05 | 8        |   |
| 144165_at | 144165 | ENSG000001PRICKLE1  | prickle hon Secreted     | I                      | 33 | 0.962182 | 1.394498 | 1.178748 | 1.543904 | 1.581859 | 5.252922 | 76.30422 | 3.31E-06 | 4.57E-05 | 8        |   |
| 144455_at | 144455 | ENSG000001E2F7      | E2F transcription facto  | I                      | 22 | 0.960404 | 1.425131 | 1.290552 | 1.433345 | 1.481538 | 6.202932 | 167.0602 | 1.89E-07 | 7.28E-06 | 8        |   |
| 122786_at | 122786 | ENSG000001FRMD6     | FERM domain containi     | I                      | 22 | 0.997452 | 1.485538 | 1.3721   | 1.655838 | 1.709391 | 7.854773 | 73.23974 | 3.84E-06 | 5.03E-05 | 8        |   |
| 5813_at   | 5813   | ENSG000001PURA      | purine-rich element bi   | I                      | 31 | 1.080688 | 1.238482 | 1.169166 | 1.195451 | 1.47507  | 8.560925 | 146.916  | 3.03E-07 | 9.61E-06 | 8        |   |
| 3667_at   | 3667   | ENSG000001IRS1      | insulin receptor substr  | I                      | 33 | 0.997827 | 1.211777 | 1.184309 | 1.30546  | 1.444007 | 5.728175 | 147.1327 | 3.01E-07 | 9.58E-06 | 8        |   |
| 91851_at  | 91851  | ENSG000001CHRD1L1   | chordin-lik Secreted     | I                      | 31 | 1.137717 | 1.203622 | 1.284971 | 1.250373 | 1.353665 | 4.065727 | 80.00735 | 2.79E-06 | 4.06E-05 | 8        |   |
| 30001_at  | 30001  | ENSG000001ERO1L     | ERO1-like ( Secreted     | I                      | 19 | 1.046056 | 1.10185  | 1.190317 | 1.293093 | 1.351772 | 7.656357 | 157.2499 | 2.36E-07 | 8.17E-06 | 8        |   |
| 60485_at  | 60485  | ENSG000001SAV1      | salvador homolog 1 (D    | I                      | 31 | 1.135706 | 1.331897 | 1.236111 | 1.392812 | 1.401657 | 6.384215 | 81.79592 | 2.57E-06 | 3.84E-05 | 8        |   |
| 1032_at   | 1032   | ENSG000001CDKN2D    | cyclin-dependent kina    | I                      | 10 | 0.970816 | 1.316741 | 1.33033  | 1.318975 | 1.351138 | 8.545129 | 115.2816 | 7.36E-07 | 1.70E-05 | 8        |   |
| 118987_at | 118987 | ENSG000001PDZD8     | PDZ domai Secreted       | I                      | 11 | 1.11649  | 1.191106 | 1.25789  | 1.289082 | 1.58846  | 5.292471 | 100.0536 | 1.23E-06 | 2.36E-05 | 8        |   |
| 64398_at  | 64398  | ENSG000001MPP5      | membrane protein, pa     | I                      | 54 | 1.011429 | 1.218006 | 1.414806 | 1.264172 | 1.52629  | 7.354615 | 159.7035 | 2.23E-07 | 8.02E-06 | 8        |   |
| 221035_at | 221035 | ENSG000001REEP3     | receptor accessory pro   | I                      | 31 | 0.810267 | 0.998942 | 1.296742 | 1.150579 | 1.538437 | 5.044754 | 120.5783 | 6.25E-07 | 1.52E-05 | 8        |   |
| 57325_at  | 57325  | ENSG000001CSR2BP    | CSR2 binding protein     | I                      | 22 | 0.893171 | 1.05285  | 1.284706 | 1.019624 | 1.424715 | 5.848225 | 51.23897 | 1.39E-05 | 0.000125 | 8        |   |
| 4900_at   | 4900   | ENSG000001NRGN      | neurogranin (protein k   | I                      | 11 | 0.93328  | 1.281028 | 1.32909  | 1.044549 | 1.460922 | 4.2985   | 77.86687 | 3.07E-06 | 4.34E-05 | 8        |   |
| 10924_at  | 10924  | ENSG000001SMPDL3A   | sphingomyelin phosph     | I                      | 11 | 0.835128 | 1.216486 | 1.171066 | 1.330614 | 1.511463 | 6.554894 | 40.50353 | 3.21E-05 | 0.000236 | 8        |   |
| 26128_at  | 26128  | ENSG000001KIAA1279  | KIAA1279                 | I                      | 22 | 0.825513 | 1.074513 | 1.672401 | 1.191567 | 1.212115 | 8.435087 | 162.8076 | 2.08E-07 | 7.71E-06 | 8        |   |
| 29950_at  | 29950  | ENSG000001SERTAD1   | SERTA domain contain     | I                      | 11 | 0.810846 | 1.266891 | 1.428213 | 1.264812 | 1.510016 | 7.329001 | 157.7047 | 2.33E-07 | 8.12E-06 | 8        |   |
| 9585_at   | 9585   | ENSG000001KIF20B    | kinesin family member    | I                      | 9  | 0.665299 | 1.336862 | 1.493229 | 1.137409 | 1.35131  | 5.39565  | 20.60001 | 0.000337 | 0.001474 | 8        |   |
| 166815_at | 166815 | ENSG000001TIGD2     | tigger transposable ele  | I                      | 11 | 1.061468 | 1.150177 | 1.562311 | 1.342901 | 1.689728 | 6.991329 | 79.09625 | 2.90E-06 | 4.17E-05 | 8        |   |
| 64430_at  | 64430  | ENSG000001C14orf135 | chromosome 14 open       | I                      | 33 | 1.149986 | 1.081507 | 1.495415 | 1.295044 | 1.664548 | 8.774241 | 124.7598 | 5.51E-07 | 1.42E-05 | 8        |   |

|           |        |                    |                          |    |          |          |          |          |          |          |          |            |          |   |
|-----------|--------|--------------------|--------------------------|----|----------|----------|----------|----------|----------|----------|----------|------------|----------|---|
| 56062_at  | 56062  | ENSG000001KLHL4    | kelch-like 4 (Drosophil  | 33 | 1.225744 | 0.852217 | 1.647318 | 1.325014 | 1.863838 | 4.686931 | 46.55017 | 1.96E-05   | 0.000161 | 8 |
| 25816_at  | 25816  | ENSG000001TNFAIP8  | tumor necrosis factor, I | 22 | 1.240044 | 1.156511 | 1.945909 | 1.377086 | 2.058902 | 4.752061 | 87.09011 | 2.05E-06   | 3.30E-05 | 8 |
| 5089_at   | 5089   | NA PBX2            | pre-B-cell leukemia ho   | 8  | 1.31336  | 1.082066 | 1.622639 | 1.228893 | 1.380332 | 6.053232 | 82.19516 | 2.53E-06   | 3.79E-05 | 8 |
| 84142_at  | 84142  | ENSG000001FAM175A  | family with sequence s   | 15 | 1.232932 | 0.937666 | 1.720159 | 1.239299 | 1.369565 | 5.072837 | 98.85727 | 1.29E-06   | 2.41E-05 | 8 |
| 9456_at   | 9456   | ENSG000001HOMER1   | homer homolog 1 (Drc     | 37 | 1.363178 | 0.966752 | 1.574698 | 1.219611 | 1.191993 | 5.49875  | 119.5687 | 6.44E-07   | 1.56E-05 | 8 |
| 121441_at | 121441 | ENSG000001NEDD1    | neural precursor cell e  | 44 | 1.081186 | 0.941878 | 1.593312 | 1.136443 | 1.469099 | 6.868826 | 188.5096 | 1.21E-07   | 5.68E-06 | 8 |
| 2764_at   | 2764   | ENSG000001GMFB     | glia maturation factor,  | 21 | 1.138999 | 0.99962  | 1.509979 | 1.04302  | 1.370693 | 7.534892 | 83.09679 | 2.43E-06   | 3.69E-05 | 8 |
| 113263_at | 113263 | ENSG000001GLCC1    | glucocorticoid induced   | 22 | 1.071608 | 0.797805 | 1.613675 | 1.040075 | 1.277533 | 5.734882 | 140.3511 | 3.58E-07   | 1.05E-05 | 8 |
| 79627_at  | 79627  | ENSG000001OGFRL1   | opioid growth factor re  | 17 | 1.206822 | 1.184228 | 1.745987 | 1.14295  | 1.355796 | 6.198186 | 78.13272 | 3.04E-06   | 4.31E-05 | 8 |
| 79633_at  | 79633  | ENSG000001FAT4     | FAT tumor suppressor     | 22 | 1.075111 | 1.253406 | 1.596284 | 1.202091 | 1.40491  | 4.201544 | 108.9211 | 9.06E-07   | 1.97E-05 | 8 |
| 3673_at   | 3673   | ENSG000001ITGA2    | integrin, alpha 2 (CD4   | 22 | 1.10013  | 0.991923 | 1.709478 | 1.36279  | 1.335239 | 9.395028 | 168.6859 | 1.82E-07   | 7.13E-06 | 8 |
| 22822_at  | 22822  | ENSG000001PHLDA1   | pleckstrin homology-iii  | 44 | 1.113742 | 1.157468 | 1.587166 | 1.183292 | 1.165599 | 10.47756 | 107.1014 | 9.63E-07   | 2.03E-05 | 8 |
| 7048_at   | 7048   | ENSG000001TGFB2    | transformin kinase       | 22 | 1.027345 | 1.179446 | 1.435264 | 1.203406 | 1.157101 | 6.775135 | 113.5397 | 7.78E-07   | 1.77E-05 | 8 |
| 3720_at   | 3720   | ENSG000001JARID2   | jumonji, AT rich intera  | 52 | 1.150873 | 1.237493 | 1.417874 | 1.297042 | 1.220049 | 5.334791 | 179.7724 | 1.44E-07   | 6.27E-06 | 8 |
| 29940_at  | 29940  | ENSG000001DSE      | dermatan sulfate epim    | 40 | 1.177414 | 1.291381 | 1.554793 | 1.16734  | 1.100781 | 4.266918 | 176.7452 | 1.54E-07   | 6.53E-06 | 8 |
| 84282_at  | 84282  | ENSG000001RNF135   | ring finger protein 135  | 22 | 1.210921 | 1.18872  | 1.538262 | 1.07083  | 1.070486 | 6.816507 | 151.0093 | 2.74E-07   | 8.95E-06 | 8 |
| 4651_at   | 4651   | ENSG000001MYO10    | myosin X                 | 36 | 0.990942 | 0.975577 | 1.444846 | 1.430894 | 1.125277 | 5.220121 | 123.481  | 5.73E-07   | 1.45E-05 | 8 |
| 10049_at  | 10049  | ENSG000001DNAJB6   | DnaJ (Hsp40) homolog     | 34 | 1.131179 | 1.070899 | 1.337238 | 1.024851 | 1.227324 | 8.041116 | 72.86807 | 3.91E-06   | 5.10E-05 | 8 |
| 222389_at | 222389 | ENSG000001BEND7    | BEN domain containin     | 22 | 1.190039 | 1.030916 | 1.386395 | 0.982694 | 1.13502  | 4.052986 | 124.5004 | 5.56E-07   | 1.42E-05 | 8 |
| 132_at    | 132    | ENSG000001ADK      | adenosine kinase         | 20 | 1.053009 | 0.968563 | 1.476769 | 0.966896 | 1.184442 | 7.753999 | 97.24361 | 1.37E-06   | 2.51E-05 | 8 |
| 2123_at   | 2123   | ENSG000001EVI2A    | ecotropic viral integrat | 11 | 1.281612 | 1.047167 | 1.437534 | 0.870943 | 1.224693 | 7.501895 | 49.16889 | 1.61E-05   | 0.000141 | 8 |
| 7026_at   | 7026   | ENSG000001NR2F2    | nuclear rec nuclear rec  | 33 | 1.265039 | 1.050045 | 1.254936 | 1.030421 | 1.272868 | 9.140245 | 125.0004 | 5.47E-07   | 1.41E-05 | 8 |
| 1432_at   | 1432   | ENSG000001MAPK14   | mitogen-act kinase       | 50 | 1.165689 | 1.017156 | 1.184928 | 0.988632 | 1.272119 | 5.575797 | 121.1747 | 6.13E-07   | 1.51E-05 | 8 |
| 5228_at   | 5228   | ENSG000001PGF      | placental g Secreted     | 11 | 1.440884 | 1.288835 | 1.551595 | 0.973143 | 1.382577 | 4.611533 | 54.70561 | 1.10E-05   | 0.000106 | 8 |
| 5272_at   | 5272   | ENSG000001SERPINB9 | serpin peptidase inhibi  | 33 | 1.576761 | 1.066201 | 1.444703 | 0.968264 | 1.22326  | 4.18732  | 102.788  | 1.12E-06   | 2.22E-05 | 8 |
| 23232_at  | 23232  | ENSG000001TBC1D12  | TBC1 domain family, n    | 11 | 1.354021 | 1.335112 | 1.383934 | 1.158058 | 1.539773 | 6.629979 | 106.6531 | 9.78E-07   | 2.04E-05 | 8 |
| 55752_at  | 55752  | ENSG00000111-Sep   | septin 11                | 44 | 1.209289 | 1.210432 | 1.456075 | 1.228958 | 1.5887   | 6.803133 | 157.7951 | 2.33E-07   | 8.12E-06 | 8 |
| 7112_at   | 7112   | ENSG000001TMPO     | thymopoie Secreted       | 62 | 1.318876 | 1.108248 | 1.305071 | 1.171067 | 1.710441 | 4.875241 | 102.2005 | 1.14E-06   | 2.24E-05 | 8 |
| 51363_at  | 51363  | ENSG000001CHST15   | carbohydrate (N-acety    | 31 | 1.345487 | 1.067512 | 1.502742 | 1.094954 | 1.536744 | 4.354018 | 72.41433 | 4.00E-06   | 5.18E-05 | 8 |
| 199704_at | 199704 | ENSG000001ZNF585A  | zinc finger protein 585  | 22 | 1.435459 | 1.119543 | 1.499778 | 1.335348 | 1.36985  | 4.787691 | 209.6819 | 8.19E-08   | 4.71E-06 | 8 |
| 6591_at   | 6591   | ENSG000001SNAI2    | snail homolog 2 (Dros    | 11 | 1.377655 | 0.934752 | 1.437884 | 1.303743 | 1.349773 | 8.735433 | 75.01787 | 3.52E-06   | 4.76E-05 | 8 |
| 8187_at   | 8187   | ENSG000001ZNF239   | zinc finger protein 239  | 11 | 1.338855 | 1.022833 | 1.254603 | 1.252422 | 1.402935 | 4.053652 | 29.13064 | 0.000102   | 0.000575 | 8 |
| 5783_at   | 5783   | ENSG000001PTPN13   | protein tyr phosphor     | 22 | 1.05299  | 1.007786 | 1.263969 | 1.178871 | 1.338415 | 4.239608 | 97.73828 | 1.34E-06   | 2.47E-05 | 8 |
| 81539_at  | 81539  | ENSG000001SLC38A1  | solute carri transporte  | 54 | 1.007711 | 1.011191 | 1.198436 | 1.17739  | 1.331956 | 6.638065 | 36.51581 | 4.63E-05   | 0.00031  | 8 |
| 55860_at  | 55860  | ENSG000001ACTR10   | actin-related protein 1  | 22 | 1.078938 | 0.930699 | 1.173806 | 1.144472 | 1.417922 | 6.279461 | 151.0863 | 2.73E-07   | 8.95E-06 | 8 |
| 9263_at   | 9263   | ENSG000001STK17A   | serine/thre kinase       | 33 | 1.050135 | 0.979979 | 1.314111 | 1.228478 | 1.451838 | 6.330891 | 115.2743 | 7.36E-07   | 1.70E-05 | 8 |
| 1948_at   | 1948   | ENSG000001EFNB2    | ephrin-B2                | 42 | 1.098458 | 0.994453 | 1.066409 | 1.311708 | 1.371818 | 4.788574 | 105.9104 | 1.00E-06   | 2.08E-05 | 8 |
| 51015_at  | 51015  | ENSG000001ISOC1    | isochorismatase doma     | 11 | 1.025771 | 0.933359 | 1.153228 | 1.295663 | 1.418478 | 7.830814 | 123.0551 | 5.80E-07   | 1.47E-05 | 8 |
| 51278_at  | 51278  | ENSG000001IER5     | immediate early respo    | 22 | 1.21252  | 0.86308  | 1.110607 | 1.294194 | 1.345589 | 6.024789 | 135.5843 | 4.07E-07   | 1.15E-05 | 8 |
| 79623_at  | 79623  | ENSG000001GALNT14  | UDP-N-ace Secreted       | 19 | 1.199084 | 0.752516 | 1.305978 | 1.096395 | 1.653891 | 4.018737 | 118.8384 | 6.59E-07   | 1.58E-05 | 8 |
| 120227_at | 120227 | ENSG000001CYP2R1   | cytochrome P450, fam     | 11 | 1.150769 | 0.744135 | 1.368245 | 1.112732 | 1.497093 | 6.735252 | 136.6156 | 3.95E-07   | 1.12E-05 | 8 |
| 51191_at  | 51191  | ENSG000001HERC5    | hect domain and RLD      | 10 | 1.182953 | 0.882081 | 1.436568 | 1.413507 | 1.617927 | 8.335034 | 55.43062 | 1.05E-05   | 0.000102 | 8 |
| 2004_at   | 2004   | ENSG000001ELK3     | ELK3, ETS-domain prot    | 11 | 1.173008 | 0.963738 | 1.319776 | 1.30159  | 1.893904 | 6.418787 | 66.36029 | 5.48E-06   | 6.47E-05 | 8 |
| 653121_at | 653121 | ENSG000001ZBTB8A   | zinc finger: Secreted    | 22 | 1.184129 | 1.020417 | 1.146788 | 1.095283 | 1.875576 | 5.315273 | 110.2635 | 8.66E-07   | 1.90E-05 | 8 |
| 8701_at   | 8701   | ENSG000001DNAH11   | dynein, axc peptidase    | 10 | 1.375206 | 1.275295 | 0.94543  | 1.190897 | 1.852638 | 4.906392 | 129.4854 | 4.81E-07   | 1.29E-05 | 8 |
| 23405_at  | 23405  | ENSG000001DICER1   | dicer 1, ribonuclease t  | 25 | 1.381395 | 1.281006 | 0.915123 | 0.918932 | 1.671444 | 6.189538 | 64.81527 | 5.97E-06   | 6.87E-05 | 8 |
| 7082_at   | 7082   | ENSG000001TJP1     | tight junction protein   | 19 | 0.913749 | 1.107125 | 1.078238 | 1.2094   | 1.385726 | 7.542371 | 73.7118  | 3.75E-06   | 4.95E-05 | 8 |
| 6594_at   | 6594   | ENSG000001SMARCA1  | SWI/SNF related, matr    | 55 | 0.86722  | 0.994702 | 1.032438 | 1.220349 | 1.439174 | 8.927785 | 105.3074 | 1.02E-06   | 2.10E-05 | 8 |
| 9867_at   | 9867   | ENSG000001PJA2     | praja ring finger 2      | 33 | 0.873597 | 0.912357 | 1.050643 | 1.230968 | 1.573403 | 7.287751 | 144.5367 | 3.22E-07   | 9.91E-06 | 8 |
| 3490_at   | 3490   | ENSG000001IGFBP7   | insulin-like Secreted    | 15 | 0.680945 | 0.964282 | 1.185351 | 1.27305  | 1.424477 | 12.04215 | 74.20729 | 3.66E-06   | 4.88E-05 | 8 |
| 2700_at   | 2700   | ENSG000001GJA3     | gap junction protein, a  | 11 | 0.583987 | 0.970668 | 1.107117 | 1.310569 | 1.48754  | 3.827272 | 120.6676 | 6.23E-07   | 1.52E-05 | 8 |
| 10970_at  | 10970  | ENSG000001CKAP4    | cytoskeleton-associate   | 22 | 0.741864 | 1.198272 | 1.175858 | 1.258957 | 1.328597 | 10.15544 | 140.0257 | 3.61E-07   | 1.06E-05 | 8 |
| 8204_at   | 8204   | ENSG000001NRIP1    | nuclear receptor inter   | 22 | 0.874217 | 1.167067 | 1.174725 | 1.531982 | 1.769925 | 4.268794 | 49.89024 | 1.53E-05   | 0.000135 | 8 |
| 8660_at   | 8660   | ENSG000001IRS2     | insulin receptor subst   | 22 | 0.908604 | 1.045244 | 1.279856 | 1.420317 | 1.766751 | 5.949641 | 31.38314 | 7.89E-05   | 0.000469 | 8 |
| 4312_at   | 4312   | ENSG000001MMP1     | matrix met peptidase     | 19 | 0.738752 | 0.93888  | 1.514897 | 1.231324 | 1.646971 | 12.72889 | 30.34034 | 8.87E-05   | 0.000514 | 8 |
| 79940_at  | 79940  | NA LINC00472       | long intergenic non-pr   | 11 | 0.605306 | 1.007847 | 1.332683 | 1.105486 | 1.882225 | 4.427073 | 90.28732 | 1.80E-06   | 3.01E-05 | 8 |
| 51315_at  | 51315  | ENSG000001KRCC1    | lysine-rich coiled-coil  | 22 | 0.720663 | 0.816219 | 1.308924 | 1.498959 | 1.685107 | 5.101323 | 38.76498 | 3.75E-05   | 0.000265 | 8 |
| 57045_at  | 57045  | ENSG000001TWSG1    | twisted gap Secreted     | 32 | 0.591874 | 0.682907 | 1.387115 | 1.275017 | 1.649078 | 7.315277 | 72.33332 | 4.01E-06   | 5.19E-05 | 8 |
| 84547_at  | 84547  | ENSG000001PGB01    | piggyBac transposable    | 21 | 0.909143 | 1.283126 | 1.653542 | 1.531372 | 1.629495 | 6.485333 | 85.76906 | 2.16E-06   | 3.43E-05 | 8 |
| 11066_at  | 11066  | ENSG000001SNRNP35  | small nuclear ribonuck   | 11 | 0.932351 | 1.248497 | 1.677057 | 1.539757 | 1.53573  | 7.638244 | 205.1114 | 8.88E-08   | 4.89E-06 | 8 |
| 157567_at | 157567 | ENSG000001ANKRD46  | ankyrin repeat domain    | 11 | 0.9548   | 1.273566 | 1.803723 | 1.425822 | 1.603384 | 6.079895 | 191.1385 | 1.15E-07   | 5.52E-06 | 8 |
| 5420_at   | 5420   | ENSG000001PODXL    | podocalyxin Secreted     | 32 | 0.941618 | 1.381254 | 1.84318  | 1.55327  | 1.516296 | 7.529162 | 83.1449  | 2.42E-06   | 3.69E-05 | 8 |
| 4052_at   | 4052   | ENSG000001LTBP1    | latent tran: kinase      | 53 | 1.097259 | 1.362575 | 1.777336 | 1.693328 | 1.624355 | 7.654133 | 173.7746 | 1.63E-07   | 6.81E-06 | 8 |
| 4675_at   | 4675   | ENSG000001NAP1L3   | nucleosome assembly      | 22 | 1.099742 | 1.34777  | 1.711543 | 1.584783 | 1.606407 | 4.500438 | 173.2534 | 1.65E-07   | 6.81E-06 | 8 |
| 1362_at   | 1362   | ENSG000001CPD      | carboxypep; peptidase    | 41 | 0.936416 | 1.391888 | 1.733665 | 1.677545 | 1.625186 | 7.740259 | 260.6315 | 3.67E-08   | 2.93E-06 | 8 |
| 57182_at  | 57182  | ENSG000001ANKRD50  | ankyrin repeat domain    | 22 | 1.079065 | 1.415682 | 1.828743 | 1.540548 | 1.905405 | 6.629518 | 114.2775 | 7.60E-07   | 1.74E-05 | 8 |
| 492311_at | 492311 | ENSG000001C5orf53  | chromosome 5 open r      | 11 | 1.032266 | 1.349394 | 1.744896 | 1.716654 | 1.888924 | 5.849335 | 100.794  | 1.20E-06   | 2.31E-05 | 8 |
| 282809_at | 282809 | ENSG000001POC1B    | POC1 centriolar protei   | 32 | 1.201863 | 1.345862 | 1.754538 | 1.422579 | 1.773905 | 6.321924 | 120.1831 | 6.32E-07</ |          |   |

|           |          |                    |                           |     |           |          |          |          |          |          |          |          |          |   |
|-----------|----------|--------------------|---------------------------|-----|-----------|----------|----------|----------|----------|----------|----------|----------|----------|---|
| 163126_at | 163126   | ENSG000001EID2     | EP300 interacting inhibi  | 11  | 0.926478  | 1.420061 | 2.164007 | 1.45003  | 1.796591 | 7.416643 | 142.5678 | 3.38E-07 | 1.02E-05 | 8 |
| 7754_at   | 7754     | NA                 | ZNF204P                   | 11  | 0.859429  | 1.228537 | 2.143098 | 1.622056 | 1.812291 | 4.305485 | 99.62498 | 1.25E-06 | 2.37E-05 | 8 |
| 5274_at   | 5274     | ENSG000001SERPIN1  | serpin pepti Secreted     | 9   | 0.657522  | 1.951703 | 2.0582   | 1.599866 | 1.630251 | 5.182295 | 66.06916 | 5.57E-06 | 6.94E-05 | 8 |
| 2512_at   | 2512     | ENSG000001FTL      | ferritin, light polypepti | 17  | 1.151402  | 1.321303 | 1.224547 | 1.108953 | 1.127874 | 12.64325 | 56.1363  | 1.00E-05 | 9.90E-05 | 8 |
| 222068_at | 222068   | ENSG000001TMED4    | transmemt Secreted        | 19  | 1.206679  | 1.332775 | 1.149078 | 1.085555 | 1.032556 | 7.933929 | 133.4874 | 4.30E-07 | 1.20E-05 | 8 |
| 8910_at   | 8910     | ENSG000001SGCE     | sarcoglycan, epsilon      | 31  | 1.070578  | 1.306038 | 1.127889 | 1.293493 | 1.077165 | 8.784752 | 139.9432 | 3.62E-07 | 1.06E-05 | 8 |
| 55770_at  | 55770    | ENSG000001EXOC2    | exocyst complex comp      | 29  | 1.07463   | 1.213264 | 1.144951 | 1.204263 | 0.969406 | 7.487772 | 103.3281 | 1.10E-06 | 2.20E-05 | 8 |
| 84792_at  | 84792    | ENSG000001C7orf70  | chromosome 7 open r       | 11  | 1.125108  | 1.204637 | 1.296642 | 1.176893 | 1.044298 | 5.846888 | 145.7899 | 3.12E-07 | 9.71E-06 | 8 |
| 6903_at   | 6903     | ENSG000001TBCC     | tubulin folding cofacto   | 22  | 1.093715  | 1.124667 | 1.256322 | 1.165582 | 1.023564 | 7.986551 | 64.91814 | 5.93E-06 | 6.85E-05 | 8 |
| 9477_at   | 9477     | ENSG000001MED20    | mediator complex sub      | 33  | 1.273987  | 1.158055 | 1.140152 | 1.2088   | 0.976855 | 6.462353 | 156.7308 | 2.39E-07 | 8.20E-06 | 8 |
| 4774_at   | 4774     | ENSG000001NFIA     | nuclear factor I/A        | 75  | 1.120713  | 1.085208 | 1.195884 | 1.040924 | 1.041223 | 3.953744 | 59.46549 | 8.14E-06 | 5.95E-05 | 8 |
| 88455_at  | 88455    | ENSG000001ANKRD13A | ankyrin repeat domain     | 32  | 1.170121  | 1.042134 | 1.203072 | 1.024603 | 1.038377 | 7.994627 | 83.71812 | 2.36E-06 | 3.64E-05 | 8 |
| 9989_at   | 9989     | ENSG000001PPP4R1   | protein phosphatase 4     | 42  | 1.050794  | 1.066694 | 1.157719 | 1.10365  | 1.081101 | 7.63703  | 98.39484 | 1.31E-06 | 2.43E-05 | 8 |
| 5069_at   | 5069     | ENSG000001PAPPA    | pregnancy- peptidase      | 81  | 1.065216  | 1.020964 | 1.14727  | 1.009655 | 1.062576 | 4.373963 | 139.9881 | 3.62E-07 | 1.06E-05 | 8 |
| 642_at    | 642      | ENSG000001BLMH     | bleomycin peptidase       | 21  | 1.031514  | 1.184396 | 1.191704 | 1.087346 | 1.244266 | 8.133547 | 144.033  | 3.26E-07 | 9.92E-06 | 8 |
| 57639_at  | 57639    | ENSG000001CCDC146  | coiled-coil domain con    | 10  | 0.985725  | 1.070556 | 1.283324 | 1.210978 | 1.15833  | 4.271496 | 47.62018 | 1.81E-05 | 0.000153 | 8 |
| 23370_at  | 23370    | ENSG000001ARHGEF18 | Rho/Rac guanine nucle     | 11  | 1.002467  | 1.105839 | 0.977222 | 1.075069 | 1.072451 | 9.382493 | 89.77809 | 1.83E-06 | 3.05E-05 | 8 |
| 64928_at  | 64928    | ENSG000001MRPL14   | mitochondrial ribosom     | 9   | 0.934909  | 1.116332 | 0.979328 | 1.066273 | 1.040382 | 10.69105 | 106.8373 | 9.72E-07 | 2.04E-05 | 8 |
| 51645_at  | 51645    | ENSG000001PPIL1    | peptidylprolyl isomera    | 29  | 0.920741  | 1.10426  | 1.016513 | 1.018058 | 1.126622 | 10.41322 | 121.5435 | 6.07E-07 | 1.51E-05 | 8 |
| 23787_at  | 23787    | ENSG000001MTCH1    | mitochondrial carrier     | 18  | 1.034081  | 1.202979 | 0.973212 | 1.116316 | 1.016117 | 10.95224 | 127.9307 | 5.03E-07 | 1.33E-05 | 8 |
| 153527_at | 153527   | ENSG000001ZMAT2    | zinc finger, matrin-tyr   | 11  | 0.972186  | 1.189279 | 0.857095 | 1.107501 | 1.129804 | 7.110919 | 72.01306 | 4.08E-06 | 5.24E-05 | 8 |
| 9369_at   | 9369     | ENSG000001NRXN3    | neurixin 3 Secreted       | 22  | 1.157952  | 1.138018 | 0.852039 | 1.119468 | 1.229777 | 3.994921 | 65.55244 | 5.73E-06 | 6.68E-05 | 8 |
| 55209_at  | 55209    | ENSG000001SETD5    | SET domain containing     | 20  | 1.036739  | 1.095105 | 0.893956 | 1.033788 | 1.279049 | 6.210928 | 144.002  | 3.26E-07 | 9.92E-06 | 8 |
| 9521_at   | 9521     | ENSG000001EEF1E1   | eukaryotic translation    | 4   | 1.220679  | 1.172687 | 1.076573 | 1.097328 | 1.063923 | 11.01945 | 131.8949 | 4.50E-07 | 1.23E-05 | 8 |
| 1778_at   | 1778     | ENSG000001DYNC1H1  | dynein, cytoplasmic 1,    | 34  | 1.267203  | 1.162258 | 1.047694 | 1.02271  | 1.079593 | 9.085244 | 62.10125 | 6.96E-06 | 7.64E-05 | 8 |
| 79642_at  | 79642    | ENSG000001ARSJ     | arylsulfatase family, m   | 44  | 1.149673  | 1.131341 | 1.057251 | 1.084921 | 1.122083 | 6.74591  | 123.3293 | 5.75E-07 | 1.46E-05 | 8 |
| 7468_at   | 7468     | ENSG000001WHSC1    | Wolf-Hirschhorn syndr     | 118 | 1.127347  | 1.266736 | 1.037065 | 0.91645  | 1.116123 | 5.339292 | 102.1201 | 1.15E-06 | 2.25E-05 | 8 |
| 81847_at  | 81847    | ENSG000001RNF146   | ring finger protein 146   | 1   | 0.9175143 | 1.121163 | 1.146251 | 1.14329  | 1.05695  | 7.521027 | 143.2378 | 3.32E-07 | 1.01E-05 | 8 |
| 52_at     | 52       | ENSG000001ACP1     | acid phosph phosphopr     | 32  | 0.933846  | 1.137556 | 1.092797 | 1.166428 | 0.994761 | 8.353857 | 127.7439 | 5.06E-07 | 1.33E-05 | 8 |
| 382_at    | 382      | ENSG000001ARF6     | ADP-ribosy GTPase         | 9   | 0.898734  | 1.051219 | 1.13694  | 1.182245 | 1.128637 | 10.32568 | 132.5814 | 4.41E-07 | 1.22E-05 | 8 |
| 55596_at  | 55596    | ENSG000001ZCHCH8   | zinc finger, CCHC dom     | 11  | 0.968827  | 1.120058 | 1.26517  | 1.077231 | 1.052644 | 7.274317 | 48.03695 | 1.75E-05 | 0.00015  | 8 |
| 387882_at | 387882   | ENSG000001C12orf75 | chromosome 12 open        | 11  | 0.938707  | 1.166719 | 1.186903 | 1.051923 | 1.133982 | 10.03166 | 113.4959 | 7.79E-07 | 1.77E-05 | 8 |
| 129642_at | 129642   | ENSG000001MBOAT2   | membrane bound O-a        | 31  | 0.900439  | 1.208884 | 1.268123 | 1.232968 | 1.05274  | 6.682012 | 107.5357 | 9.49E-07 | 2.02E-05 | 8 |
| 135293_at | 135293   | ENSG000001PM20D2   | peptidase I peptidase     | 30  | 0.798595  | 1.130565 | 1.206352 | 1.237497 | 1.109632 | 4.163651 | 58.9495  | 8.40E-06 | 8.70E-05 | 8 |
| 3622_at   | 3622     | ENSG000001ING2     | inhibitor of growth fan   | 11  | 0.968854  | 1.236166 | 1.180676 | 0.849694 | 1.205358 | 8.086816 | 91.79217 | 1.69E-06 | 2.89E-05 | 8 |
| 6319_at   | 6319     | ENSG000001SCD      | stearoyl-CoA desatura     | 17  | 0.808263  | 1.410371 | 1.120425 | 0.934282 | 1.065132 | 7.015454 | 78.13426 | 3.04E-06 | 4.31E-05 | 8 |
| 221662_at | 221662   | ENSG000001RBM24    | RNA binding motif pro     | 51  | 1.317168  | 1.417009 | 1.226385 | 1.199868 | 0.757283 | 3.844814 | 53.81351 | 1.17E-05 | 0.00011  | 8 |
| 11145_at  | 11145    | ENSG000001PLA2G16  | phospholipase A2, gro     | 21  | 1.38184   | 1.322708 | 1.206448 | 1.198423 | 0.783732 | 5.79221  | 93.86034 | 1.56E-06 | 2.72E-05 | 8 |
| 57228_at  | 57228    | ENSG000001SMAGP    | small cell adhesion gly   | 22  | 1.265308  | 1.458944 | 1.183125 | 1.178386 | 0.84673  | 6.735326 | 163.5673 | 2.04E-07 | 7.63E-06 | 8 |
| 4953_at   | 4953     | ENSG000001ODC1     | ornithine decarboxylas    | 10  | 1.234963  | 1.349689 | 1.20675  | 1.360939 | 0.800423 | 10.11997 | 62.70854 | 6.72E-06 | 7.46E-05 | 8 |
| 26031_at  | 26031    | ENSG000001OSBPL3   | oxysterol binding proti   | 43  | 1.156761  | 1.306123 | 1.225462 | 1.159741 | 0.820541 | 7.641795 | 128.8347 | 4.90E-07 | 1.30E-05 | 8 |
| 55049_at  | 55049    | ENSG000001C19orf60 | chromosome 19 open        | 19  | 1.242486  | 1.180189 | 1.154916 | 1.130099 | 0.756399 | 8.605424 | 145.9338 | 3.10E-07 | 9.71E-06 | 8 |
| 54830_at  | 54830    | ENSG000001NUP62CL  | nucleoporin 62kDa C-t     | 11  | 1.083879  | 1.482323 | 1.334684 | 1.046087 | 0.980149 | 4.187732 | 69.42439 | 4.66E-06 | 5.74E-05 | 8 |
| 60685_at  | 60685    | ENSG000001ZFAND3   | zinc finger, AN1-type d   | 22  | 0.987479  | 1.484442 | 1.261791 | 1.128515 | 0.959034 | 8.106489 | 144.2785 | 3.24E-07 | 9.92E-06 | 8 |
| 90637_at  | 90637    | ENSG000001ZFAND2A  | zinc finger, AN1-type d   | 9   | 0.1039952 | 1.634556 | 1.179503 | 1.219018 | 0.995117 | 7.595096 | 115.2914 | 7.36E-07 | 1.70E-05 | 8 |
| 10400_at  | 10400    | ENSG000001PEMT     | phosphatidylethanolar     | 6   | 1.022209  | 1.513618 | 1.005628 | 1.221399 | 0.913646 | 7.976755 | 81.78265 | 2.57E-06 | 3.84E-05 | 8 |
| 65018_at  | 65018    | ENSG000001PINK1    | PTEN induc kinase         | 20  | 1.26814   | 1.435586 | 1.110703 | 1.217056 | 1.045494 | 7.92489  | 144.0215 | 3.26E-07 | 9.92E-06 | 8 |
| 1054_at   | 1054     | ENSG000001CEBPG    | CCAAT/enhancer bindi      | 22  | 1.161615  | 1.474289 | 0.974157 | 1.23771  | 1.031112 | 7.569382 | 99.25548 | 1.27E-06 | 2.39E-05 | 8 |
| 2314_at   | 2314     | ENSG000001FLII     | flightless I homolog (D   | 43  | 1.310444  | 1.584218 | 1.162273 | 1.304065 | 1.033762 | 9.269948 | 191.6198 | 1.14E-07 | 5.51E-06 | 8 |
| 55644_at  | 55644    | ENSG000001OSGEP    | O-sialoglyc peptidase     | 10  | 1.475828  | 1.412585 | 1.014528 | 1.281203 | 0.871157 | 7.887043 | 68.94003 | 4.78E-06 | 5.85E-05 | 8 |
| 9124_at   | 9124     | ENSG000001PDLIM1   | PDZ and LIM domain 1      | 21  | 1.387328  | 1.294745 | 0.993398 | 1.265397 | 1.097812 | 7.918346 | 107.9137 | 9.37E-07 | 9.20E-05 | 8 |
| 5137_at   | 5137     | ENSG000001PDE1C    | phosphodiesterase 1C,     | 20  | 1.441773  | 1.474787 | 0.932753 | 1.065076 | 0.882665 | 4.841398 | 57.61662 | 1.22E-06 | 9.25E-05 | 8 |
| 23129_at  | 23129    | ENSG000001PLXND1   | plexin D1                 | 22  | 1.380376  | 1.496629 | 0.833532 | 1.025589 | 0.970573 | 4.316259 | 118.4688 | 6.66E-07 | 1.59E-05 | 8 |
| 65989_at  | 65989    | ENSG000001DLK2     | delta-like 2 homolog (T   | 11  | 1.332284  | 1.374669 | 0.885222 | 1.015703 | 0.900587 | 5.260092 | 23.73327 | 0.000208 | 0.000998 | 8 |
| 9517_at   | 9517     | ENSG000001SPTLC2   | serine palmitoyltransf    | 30  | 1.16021   | 1.516186 | 0.799856 | 1.102344 | 1.012144 | 7.096775 | 120.9795 | 6.17E-07 | 1.52E-05 | 8 |
| 50619_at  | 50619    | ENSG000001DEF6     | differentially express    | 9   | 0.804506  | 1.571442 | 0.981974 | 1.368105 | 0.90725  | 4.0593   | 41.20735 | 3.02E-05 | 0.000225 | 8 |
| 441094_at | 441094   | NA                 | FLJ42709                  | 8   | 0.798902  | 1.656487 | 0.954599 | 1.184853 | 0.679728 | 7.415985 | 50.40523 | 1.47E-05 | 0.000131 | 8 |
| 340719_at | 340719   | ENSG000001NANOS1   | nanos homolog 1 (Dro:     | 21  | 0.788656  | 1.502377 | 1.278021 | 1.290196 | 0.623656 | 4.544686 | 24.7314  | 0.00018  | 0.000891 | 8 |
| 84830_at  | 84830    | ENSG000001C6orf105 | chromosome 6 open r       | 21  | 0.83683   | 1.565816 | 1.191635 | 1.254533 | 0.55269  | 4.84467  | 76.90031 | 3.22E-06 | 4.48E-05 | 8 |
| 7466_at   | 7466     | ENSG000001WFS1     | Wolfram syndrome 1 (N     | 11  | 1.261271  | 1.557552 | 0.945071 | 1.176324 | 0.782734 | 5.277951 | 39.62322 | 3.47E-05 | 0.00025  | 8 |
| 80323_at  | 80323    | ENSG000001CCDC68   | coiled-coil domain con    | 29  | 1.283908  | 1.509288 | 0.729848 | 1.242281 | 0.628834 | 4.508719 | 36.57384 | 4.61E-05 | 0.000309 | 8 |
| 16_at     | 16       | ENSG000001AARS     | alanyl-tRNA synthetas     | 21  | 1.091695  | 1.408463 | 0.947908 | 1.149599 | 0.600311 | 7.321665 | 50.98883 | 1.41E-05 | 0.000127 | 8 |
| 100507436 | 1.01E+08 | NA                 | MICA                      | 21  | 1.048246  | 1.405639 | 0.721493 | 1.07136  | 0.553982 | 9.306788 | 53.49689 | 1.19E-05 | 0.000112 | 8 |
| 705_at    | 705      | ENSG000001BYSL     | bystin-like               | 10  | 1.217767  | 1.224735 | 0.769796 | 1.001976 | 0.944212 | 8.981488 | 107.7353 | 9.43E-07 | 2.01E-05 | 8 |
| 9117_at   | 9117     | ENSG000001SEC22C   | SEC22 vesicle traffickir  | 33  | 1.129653  | 1.187261 | 0.806694 | 1.009513 | 1.024793 | 6.480133 | 99.29225 | 1.27E-06 | 2.39E-05 | 8 |
| 51251_at  | 51251    | ENSG000001NT5C3    | 5'-nucleoti Secreted      | 7   | 1.232063  | 1.142529 | 0.842297 | 0.885567 | 1.048546 | 9.948638 | 79.79374 | 2.81E-06 | 4.08E-05 | 8 |
| 8225_at   | 8225     | ENSG000001GTPBP6   | GTP binding protein 6     | 21  | 1.054547  | 1.275176 | 1.005755 | 0.997192 | 0.897593 | 7.338069 | 108.5131 | 9.18E-07 | 1.98E-05 | 8 |
| 201294_at | 201294   | ENSG000001UNC13D   | unc-13 homolog D (C.      | 41  | 1.092147  | 1.240537 | 1.055147 | 0.943338 | 0.860446 | 4.292799 | 67.77809 | 5.08E-0  |          |   |

|           |        |                    |                            |                          |          |          |          |          |          |          |          |          |          |          |   |
|-----------|--------|--------------------|----------------------------|--------------------------|----------|----------|----------|----------|----------|----------|----------|----------|----------|----------|---|
| 55786_at  | 55786  | ENSG000001ZNF415   | zinc finger protein 415 N  | 10                       | 1.075632 | 0.825587 | 1.224507 | 0.981735 | 1.046487 | 3.703182 | 31.63545 | 7.67E-05 | 0.000459 | 8        |   |
| 147015_at | 147015 | ENSG000001DHRS13   | dehydrogenase/reduct I     | 11                       | 1.069386 | 0.694201 | 1.27537  | 1.067427 | 1.005316 | 5.034858 | 40.24132 | 3.29E-05 | 0.000239 | 8        |   |
| 55975_at  | 55975  | ENSG000001KLHL7    | kelch-like 7 (Drosophil    | 42                       | 1.050518 | 0.798662 | 1.25224  | 1.260259 | 1.003703 | 6.033478 | 78.60231 | 2.97E-06 | 4.24E-05 | 8        |   |
| 5125_at   | 5125   | ENSG000001PCSK5    | proprotein peptidase N     | 10                       | 1.185841 | 0.605084 | 1.215158 | 1.036012 | 0.908987 | 4.230316 | 51.4015  | 1.37E-05 | 0.000125 | 8        |   |
| 80303_at  | 80303  | ENSG000001EFHD1    | EF-hand domain family I    | 20                       | 1.200215 | 0.684385 | 1.209987 | 0.988106 | 0.8308   | 4.375013 | 34.43489 | 5.70E-05 | 0.000364 | 8        |   |
| 3600_at   | 3600   | ENSG000001IL15     | interleukin Secreted I     | 27                       | 1.270614 | 0.637516 | 1.266435 | 0.811846 | 0.810893 | 3.905634 | 68.12171 | 4.99E-06 | 6.03E-05 | 8        |   |
| 63898_at  | 63898  | ENSG000001SH2D4A   | SH2 domain containing N    | 21                       | 1.15123  | 0.664545 | 1.144156 | 0.788883 | 0.955404 | 4.543581 | 36.98001 | 4.43E-05 | 0.0003   | 8        |   |
| 2968_at   | 2968   | NA                 | GTF2H4                     | general transcription f  | 17       | 1.134009 | 1.303161 | 1.16843  | 1.061978 | 0.664709 | 6.915271 | 57.06264 | 9.44E-06 | 9.49E-05 | 8 |
| 2048_at   | 2048   | ENSG000001EPHB2    | EPH recept kinase I        | 43                       | 1.21925  | 1.249814 | 1.212608 | 0.937313 | 0.655713 | 4.229177 | 74.34082 | 3.64E-06 | 4.87E-05 | 8        |   |
| 8061_at   | 8061   | ENSG000001FOSL1    | FOS-like antigen 1 I       | 16                       | 1.205497 | 1.40112  | 1.170204 | 0.833338 | 0.613456 | 7.467194 | 83.29911 | 2.41E-06 | 3.67E-05 | 8        |   |
| 81029_at  | 81029  | ENSG000001WNT5B    | wingless-ty Secreted N     | 32                       | 1.235916 | 1.400192 | 1.391725 | 1.065975 | 0.535392 | 4.378876 | 79.67095 | 2.83E-06 | 4.10E-05 | 8        |   |
| 11226_at  | 11226  | ENSG000001GALNT6   | UDP-N-ace Secreted I       | 20                       | 1.062785 | 1.241337 | 1.272556 | 1.211798 | 0.565298 | 3.99076  | 38.23721 | 3.94E-05 | 0.000275 | 8        |   |
| 84293_at  | 84293  | ENSG000001C10orf58 | chromosom Secreted I       | 8                        | 1.010451 | 1.122443 | 1.330716 | 1.064081 | 0.673496 | 9.268504 | 124.4552 | 5.56E-07 | 1.42E-05 | 8        |   |
| 79661_at  | 79661  | ENSG000001NEIL1    | nei endonuclease VIII-I N  | 10                       | 0.976026 | 1.153671 | 1.298405 | 0.890013 | 0.461064 | 3.988217 | 41.09449 | 3.05E-05 | 0.000227 | 8        |   |
| 5768_at   | 5768   | ENSG000001QSOX1    | quiescin Q1 Secreted I     | 11                       | 1.13615  | 1.221966 | 0.993484 | 0.896511 | 0.565073 | 8.910469 | 57.73003 | 9.06E-06 | 9.20E-05 | 8        |   |
| 3911_at   | 3911   | ENSG000001LAMAS    | laminin, alj Secreted I    | 15                       | 1.246771 | 1.191941 | 0.993042 | 0.864503 | 0.481861 | 4.05436  | 30.26603 | 8.95E-05 | 0.000517 | 8        |   |
| 3892_at   | 3892   | ENSG000001KRT86    | keratin 86 I               | 11                       | 1.194754 | 1.355118 | 1.061512 | 0.8842   | 0.424018 | 5.112263 | 19.82793 | 0.000383 | 0.001639 | 8        |   |
| 25827_at  | 25827  | ENSG000001FBXL2    | F-box and I Secreted I     | 33                       | 1.233751 | 1.175922 | 1.00772  | 1.159514 | 0.597847 | 4.26461  | 36.27303 | 4.74E-05 | 0.000316 | 8        |   |
| 9578_at   | 9578   | ENSG000001CDC42BPB | CDC42 binc kinase I        | 11                       | 1.22506  | 1.056919 | 1.131533 | 1.188083 | 0.504832 | 6.039242 | 24.66276 | 0.000182 | 0.000898 | 8        |   |
| 23645_at  | 23645  | ENSG000001PPP1R15A | protein phosphatase 1 I    | 10                       | 1.383188 | 0.967465 | 0.789592 | 1.237403 | 0.335731 | 7.056175 | 29.73589 | 9.52E-05 | 0.000543 | 8        |   |
| 10370_at  | 10370  | ENSG000001CITED2   | Cbp/p300-interacting I     | 22                       | 1.438128 | 1.303749 | 1.578319 | 1.141852 | 0.928106 | 8.140675 | 18.83212 | 0.000456 | 0.00189  | 8        |   |
| 9424_at   | 9424   | ENSG000001KCNK6    | potassium ion channe I     | 31                       | 1.345765 | 1.249544 | 1.515984 | 1.19261  | 0.863716 | 4.647943 | 157.1331 | 2.37E-07 | 8.18E-06 | 8        |   |
| 53407_at  | 53407  | ENSG000001STX18    | syntaxin 18 I              | 10                       | 1.420174 | 1.170775 | 1.500618 | 1.132657 | 1.058987 | 6.366322 | 198.4138 | 1.00E-07 | 5.18E-06 | 8        |   |
| 3437_at   | 3437   | ENSG000001IFIT3    | interferon-induced prc I   | 11                       | 1.356123 | 1.017184 | 1.512021 | 1.0788   | 0.876004 | 7.845781 | 62.24699 | 6.91E-06 | 7.60E-05 | 8        |   |
| 151887_at | 151887 | ENSG000001CCDC80   | coiled-coil I Secreted I   | 57                       | 1.533689 | 1.300813 | 1.595761 | 0.977265 | 0.861898 | 4.8234   | 112.443  | 8.06E-07 | 1.81E-05 | 8        |   |
| 389840_at | 389840 | ENSG000001MAP3K15  | mitogen-ac kinase I        | 11                       | 1.305145 | 1.199268 | 1.722887 | 0.949955 | 0.900925 | 4.175354 | 65.67416 | 5.69E-06 | 6.65E-05 | 8        |   |
| 51205_at  | 51205  | ENSG000001ACP6     | acid phosp Secreted I      | 11                       | 1.321541 | 1.325841 | 1.822874 | 1.212734 | 1.171198 | 7.977831 | 90.27191 | 1.80E-06 | 3.01E-05 | 8        |   |
| 2669_at   | 2669   | ENSG000001GEM      | GTP binding protein o I    | 11                       | 1.434554 | 1.292309 | 1.718169 | 1.263205 | 1.047564 | 7.980077 | 106.968  | 9.68E-07 | 2.04E-05 | 8        |   |
| 7078_at   | 7078   | ENSG000001TIMP3    | TIMP meta Secreted I       | 31                       | 1.326985 | 1.108817 | 1.797471 | 1.074687 | 1.095715 | 8.630238 | 101.6393 | 1.17E-06 | 2.27E-05 | 8        |   |
| 3397_at   | 3397   | ENSG000001ID1      | inhibitor of DNA bindi I   | 33                       | 1.489227 | 1.00417  | 1.784686 | 0.972349 | 1.107768 | 8.044272 | 21.61346 | 0.000286 | 0.00129  | 8        |   |
| 374378_at | 374378 | ENSG000001GALNTL4  | UDP-N-acetyl-alpha-D- N    | 11                       | 1.758425 | 1.405457 | 1.782404 | 0.940051 | 1.018955 | 4.834538 | 33.87153 | 6.04E-05 | 0.00038  | 8        |   |
| 50861_at  | 50861  | ENSG000001STMN3    | stathmin-like 3 I          | 25                       | 1.759047 | 0.924558 | 1.082894 | 1.080861 | 0.856147 | 4.770166 | 69.19234 | 4.71E-06 | 5.80E-05 | 8        |   |
| 9966_at   | 9966   | ENSG000001TNFSF15  | tumor necrosis factor I    | 21                       | 1.441325 | 1.134122 | 1.764559 | 1.122106 | 0.290945 | 4.160017 | 120.8894 | 6.19E-07 | 1.52E-05 | 8        |   |
| 1969_at   | 1969   | ENSG000001EPHA2    | EPH recept kinase I        | 20                       | 1.194048 | 1.6331   | 1.736213 | 1.429654 | 0.937793 | 7.940457 | 158.2134 | 2.31E-07 | 8.08E-06 | 8        |   |
| 598_at    | 598    | ENSG000001BCL2L1   | BCL2-like 1 I              | 22                       | 1.292448 | 1.450156 | 1.669649 | 1.329542 | 0.930592 | 6.525897 | 125.7379 | 5.36E-07 | 1.39E-05 | 8        |   |
| 7032_at   | 7032   | ENSG000001TFF2     | trefoil fact Secreted I    | 9                        | 1.063446 | 1.339649 | 1.517241 | 1.477795 | 0.766907 | 5.54333  | 41.62826 | 2.91E-05 | 0.000218 | 8        |   |
| 28227_at  | 28227  | ENSG000001PPP2R3B  | protein phc phosphopr I    | 9                        | 1.036104 | 1.562387 | 1.714453 | 1.651355 | 1.019622 | 4.954802 | 187.2468 | 1.24E-07 | 5.79E-06 | 8        |   |
| 400451_at | 400451 | ENSG000001FAM174B  | family with sequence s I   | 9                        | 1.178578 | 1.500497 | 1.64397  | 1.593354 | 0.9374   | 4.114238 | 46.18711 | 2.01E-05 | 0.000165 | 8        |   |
| 79887_at  | 79887  | ENSG000001PLBD1    | phospholipase B doma N     | 10                       | 1.105142 | 1.885595 | 1.692953 | 1.060836 | 0.804646 | 4.168468 | 160.4572 | 2.19E-07 | 7.98E-06 | 8        |   |
| 56474_at  | 56474  | ENSG000001CTPS2    | CTP synthase II I          | 17                       | 1.491444 | 0.693603 | 1.126992 | 0.983698 | 0.558751 | 6.626851 | 91.7556  | 1.69E-06 | 2.89E-05 | 8        |   |
| 9022_at   | 9022   | ENSG000001CLIC3    | chloride int ion channe I  | 10                       | 1.479955 | 0.309944 | 1.294616 | 1.089438 | 0.657589 | 3.969292 | 17.08306 | 0.000631 | 0.00246  | 8        |   |
| 2644_at   | 2644   | ENSG000001GCFHR    | GTP cyclohydrolase I f     | 9                        | 1.938661 | 0.504392 | 1.090347 | 0.798519 | 1.265965 | 4.08888  | 23.8904  | 0.000203 | 0.00098  | 8        |   |
| 23452_at  | 23452  | ENSG000001ANGPTL2  | angiopoietin Secreted I    | 32                       | 1.182409 | 0.773071 | 1.951153 | 1.53243  | 1.503705 | 4.500011 | 19.5531  | 0.000401 | 0.001701 | 8        |   |
| 90594_at  | 90594  | ENSG000001ZNF439   | zinc finger protein 439 I  | 11                       | 1.578058 | 0.389417 | 1.787529 | 1.542087 | 1.259504 | 3.894764 | 74.04582 | 3.69E-06 | 4.90E-05 | 8        |   |
| 2317_at   | 2317   | ENSG000001FLNB     | filamin B, beta I          | 22                       | 0.675334 | 1.199725 | 0.868853 | 1.10399  | 0.836494 | 8.685189 | 111.7639 | 8.24E-07 | 1.84E-05 | 8        |   |
| 23593_at  | 23593  | ENSG000001HEBP2    | heme binding protein I     | 10                       | 0.682731 | 1.092865 | 0.724081 | 1.051193 | 0.89993  | 8.130914 | 59.71473 | 8.02E-06 | 8.39E-05 | 8        |   |
| 10490_at  | 10490  | ENSG000001VTI1B    | vesicle transport throu I  | 6                        | 0.539998 | 1.236118 | 0.741408 | 0.960803 | 0.815378 | 9.654161 | 75.07002 | 3.51E-06 | 4.75E-05 | 8        |   |
| 1318_at   | 1318   | ENSG000001SLC31A2  | solute carri transporte I  | 27                       | 0.560448 | 1.105825 | 0.991543 | 1.082446 | 0.640102 | 6.186488 | 83.2642  | 2.41E-06 | 3.67E-05 | 8        |   |
| 9415_at   | 9415   | ENSG000001FADS2    | fatty acid desaturase 2 I  | 41                       | 0.461545 | 1.259907 | 0.892126 | 1.10343  | 0.630004 | 4.514393 | 92.64911 | 1.63E-06 | 2.84E-05 | 8        |   |
| 11020_at  | 11020  | ENSG000001IFT27    | intraflagellar transport N | 10                       | 0.265943 | 1.257513 | 0.687952 | 1.084596 | 0.633926 | 5.075701 | 36.13532 | 4.81E-05 | 0.000319 | 8        |   |
| 90701_at  | 90701  | ENSG000001SEC11C   | SEC11 hom peptidase I      | 9                        | 0.426992 | 1.468809 | 1.126496 | 1.424101 | 0.759658 | 7.194903 | 24.20379 | 0.000194 | 0.000944 | 8        |   |
| 7436_at   | 7436   | ENSG000001VLDLR    | very low de Secreted N     | 11                       | 0.255092 | 1.331983 | 1.101446 | 1.147321 | 0.988893 | 4.568279 | 34.15125 | 5.86E-05 | 0.000372 | 8        |   |
| 26037_at  | 26037  | ENSG000001SIPAL11  | signal-induced prolifer I  | 11                       | 0.766263 | 1.178429 | 0.80988  | 1.423366 | 1.311153 | 6.508598 | 55.00858 | 1.08E-05 | 0.000104 | 8        |   |
| 65267_at  | 65267  | ENSG000001WNK3     | WNK lysine kinase I        | 11                       | 0.433002 | 1.17501  | 0.603489 | 1.411564 | 1.450187 | 3.595957 | 76.57327 | 3.27E-06 | 4.53E-05 | 8        |   |
| 84101_at  | 84101  | ENSG000001USP44    | ubiquitin sj peptidase I   | 22                       | 0.855791 | 0.833769 | 0.808113 | 1.403505 | 1.150744 | 3.757692 | 61.54936 | 7.19E-06 | 7.79E-05 | 8        |   |
| 80144_at  | 80144  | ENSG000001FRAS1    | Fraser syndrome 1 I        | 20                       | 0.587598 | 0.912146 | 0.571006 | 1.47524  | 1.147044 | 4.122558 | 45.13174 | 2.19E-05 | 0.000176 | 8        |   |
| 129790_at | 129790 | NA                 | C7orf13                    | chromosome 7 open ri I   | 22       | 0.8504   | 1.446118 | 0.881229 | 1.129993 | 1.216667 | 4.930618 | 143.0314 | 3.34E-07 | 1.01E-05 | 8 |
| 133022_at | 133022 | ENSG000001TRAM1L1  | translocation associate N  | 11                       | 0.765652 | 1.394333 | 0.746974 | 1.275702 | 1.071518 | 4.244005 | 66.40645 | 5.47E-06 | 6.47E-05 | 8        |   |
| 55855_at  | 55855  | NA                 | FAM45B                     | family with sequence s I | 3        | 0.935716 | 1.315394 | 0.460888 | 1.027555 | 1.176629 | 7.48044  | 37.73315 | 4.13E-05 | 0.000285 | 8 |
| 55222_at  | 55222  | ENSG000001LRRC20   | leucine rich repeat con I  | 11                       | 1.061859 | 1.878242 | 0.516823 | 1.876855 | 1.108351 | 5.701921 | 71.30739 | 4.23E-06 | 5.38E-05 | 8        |   |
| 254295_at | 254295 | ENSG000001PHYHD1   | phytanoyl-CoA dioxyme I    | 10                       | 0.982046 | 1.506598 | 0.58265  | 1.986506 | 1.215409 | 4.756035 | 37.21133 | 4.33E-05 | 0.000295 | 8        |   |
| 51184_at  | 51184  | ENSG000001GPN3     | GPN-loop GTPase 3 I        | 29                       | 0.593587 | 0.810391 | 1.015951 | 0.975497 | 1.275588 | 8.723481 | 106.8334 | 9.72E-07 | 2.04E-05 | 8        |   |
| 5427_at   | 5427   | ENSG000001POLE2    | polymerase (DNA direx I    | 7                        | 0.614322 | 0.762409 | 0.957389 | 0.998271 | 1.264188 | 8.570542 | 75.68851 | 3.41E-06 | 4.66E-05 | 8        |   |
| 3091_at   | 3091   | ENSG000001HIF1A    | hypoxia inducible fact I   | 77                       | 0.658665 | 0.713715 | 1.034218 | 0.975909 | 1.184543 | 9.170491 | 55.0784  | 1.07E-05 | 0.000104 | 8        |   |
| 5911_at   | 5911   | ENSG000001RAP2A    | RAP2A, me GTPase I         | 22                       | 0.576655 | 0.662347 | 1.078721 | 0.943607 | 1.227134 | 6.465599 | 28.04224 | 0.000117 | 0.000636 | 8        |   |
| 6558_at   | 6558   | ENSG000001SLC12A2  | solute carri transporte N  | 31                       | 0.625535 | 0.849683 | 1.040414 | 0.816109 | 1.232413 | 4.905187 | 38.8394  | 3.73E-05 | 0.000264 | 8        |   |
| 9184_at   | 9184   | ENSG000001BUB3     | budding uninhibited b I    | 24                       | 0.668318 | 0.795753 | 0.978236 | 0.839021 | 1.164881 | 9.256979 | 61.77937 | 7.10E-06 | 7.73E-05 | 8        |   |
| 5827_at   | 5827   | ENSG000001PXMP2    | peroxisomal membran I      | 28                       | 0.575798 | 0.735831 | 1.047483 | 0.862435 | 1.11639  |          |          |          |          |          |   |

|           |        |                     |                           |     |           |          |          |          |          |          |          |          |          |   |
|-----------|--------|---------------------|---------------------------|-----|-----------|----------|----------|----------|----------|----------|----------|----------|----------|---|
| 94239_at  | 94239  | ENSG000001H2AFV     | H2A histone family, m     | 34  | 0.74446   | 0.870092 | 1.053145 | 1.040211 | 1.020685 | 7.894015 | 107.4524 | 9.52E-07 | 2.02E-05 | 8 |
| 5884_at   | 5884   | ENSG000001RAD17     | RAD17 homolog (S. po      | 18  | 0.652033  | 0.785849 | 1.126051 | 1.08096  | 0.973252 | 7.912414 | 92.55978 | 1.64E-06 | 2.84E-05 | 8 |
| 79609_at  | 79609  | ENSG000001METTL21D  | methyltransferase like NI | 14  | 0.729203  | 0.806184 | 0.960786 | 1.119438 | 0.959921 | 5.489356 | 97.89009 | 1.34E-06 | 2.47E-05 | 8 |
| 121457_at | 121457 | ENSG000001IKBIP     | IKKBK interacting prot    | 33  | 0.773736  | 0.997117 | 1.291291 | 1.064575 | 1.235619 | 7.774908 | 80.92937 | 2.67E-06 | 3.95E-05 | 8 |
| 166929_at | 166929 | ENSG000001SGMS2     | sphingomy kinase          | 33  | 0.802177  | 0.94524  | 1.247191 | 1.016502 | 1.258713 | 4.397947 | 33.95672 | 5.98E-05 | 0.000379 | 8 |
| 26115_at  | 26115  | ENSG000001TANC2     | tetratricopeptide repe    | 11  | 0.733104  | 1.029918 | 1.22422  | 0.937247 | 1.105706 | 7.440389 | 33.52967 | 6.25E-05 | 0.000392 | 8 |
| 5530_at   | 5530   | ENSG000001PPP3CA    | protein phk phosphopr     | 43  | 0.837385  | 0.882969 | 1.153303 | 0.984722 | 1.352778 | 8.381359 | 111.2581 | 8.38E-07 | 1.86E-05 | 8 |
| 7913_at   | 7913   | ENSG000001DEK       | DEK oncogene              | 69  | 0.825542  | 0.844386 | 1.144911 | 0.988081 | 1.367418 | 10.63629 | 117.8754 | 6.79E-07 | 1.61E-05 | 8 |
| 1871_at   | 1871   | ENSG000001E2F3      | E2F transcr Secreted      | 13  | 0.690882  | 0.889395 | 1.153146 | 0.888783 | 1.268016 | 7.605943 | 63.61749 | 6.38E-06 | 7.19E-05 | 8 |
| 27106_at  | 27106  | ENSG000001ARRDC2    | arrestin domain contai    | 11  | 0.562783  | 1.034959 | 0.995215 | 1.159269 | 1.203756 | 6.845991 | 69.21782 | 4.71E-06 | 5.79E-05 | 8 |
| 84527_at  | 84527  | ENSG000001ZNF559    | zinc finger protein 559   | 33  | 0.597852  | 0.981764 | 0.947121 | 1.091691 | 1.216013 | 6.23277  | 108.8392 | 9.08E-07 | 1.97E-05 | 8 |
| 28966_at  | 28966  | ENSG000001SNX24     | sorting nexin 24          | 42  | 0.676983  | 0.985059 | 0.995949 | 1.070863 | 1.26338  | 7.090809 | 55.51802 | 1.04E-05 | 0.000102 | 8 |
| 8148_at   | 8148   | ENSG000001TAF15     | TAF15 RNA polymeras       | 15  | 0.741524  | 1.073086 | 1.00644  | 0.898382 | 1.2609   | 10.02397 | 70.99045 | 4.30E-06 | 5.42E-05 | 8 |
| 54453_at  | 54453  | ENSG000001RIN2      | Ras and Rab interactor    | 22  | 0.659897  | 1.039166 | 0.999909 | 0.894181 | 1.112075 | 7.139633 | 107.546  | 9.49E-07 | 2.02E-05 | 8 |
| 9397_at   | 9397   | ENSG000001NMT2      | N-myristoyltransferase    | 41  | 0.932041  | 0.919976 | 1.268398 | 1.138113 | 1.181813 | 7.056003 | 54.7088  | 1.10E-05 | 0.000106 | 8 |
| 81537_at  | 81537  | ENSG000001SGPP1     | sphingosine-1-phosph      | 22  | 0.894861  | 0.913297 | 1.246072 | 1.034026 | 1.200947 | 7.94349  | 94.01969 | 1.55E-06 | 2.72E-05 | 8 |
| 2908_at   | 2908   | ENSG000001NR3C1     | nuclear rec nuclear rec   | 106 | 0.927786  | 0.86434  | 1.241596 | 1.072667 | 1.298086 | 7.91317  | 127.2929 | 5.12E-07 | 1.34E-05 | 8 |
| 79768_at  | 79768  | ENSG000001C15orf29  | chromosome 15 open NI     | 11  | 0.890912  | 0.865364 | 1.390766 | 0.93914  | 1.27231  | 6.057246 | 112.0911 | 8.16E-07 | 1.82E-05 | 8 |
| 4659_at   | 4659   | ENSG000001PPP1R12A  | protein phosphatase 1     | 47  | 0.124616  | 0.811607 | 1.250757 | 0.920065 | 1.219992 | 7.778552 | 118.2464 | 6.71E-07 | 1.60E-05 | 8 |
| 114882_at | 114882 | ENSG000001OSBPL8    | oxysterol binding prot    | 52  | 0.1074354 | 0.880715 | 1.187784 | 1.051408 | 1.393883 | 6.051774 | 54.95881 | 1.08E-05 | 0.000105 | 8 |
| 6732_at   | 6732   | ENSG000001SRPK1     | SRSF protei kinase        | 25  | 0.995458  | 0.86184  | 1.17903  | 1.015269 | 1.371709 | 8.43325  | 86.66954 | 2.08E-06 | 3.33E-05 | 8 |
| 3075_at   | 3075   | ENSG000001CFH       | complemei Secreted        | 12  | 0.1092149 | 0.90666  | 1.291818 | 1.058616 | 1.346986 | 4.132656 | 52.36994 | 1.28E-05 | 0.000119 | 8 |
| 79745_at  | 79745  | ENSG000001CLIP4     | CAP-GLY domain cont       | 41  | 0.828577  | 1.005141 | 1.415963 | 1.191832 | 1.274564 | 5.684324 | 136.0733 | 4.01E-07 | 1.13E-05 | 8 |
| 24138_at  | 24138  | ENSG000001IFIT5     | interferon-induced prc    | 20  | 0.868753  | 0.983397 | 1.342882 | 1.100435 | 1.138318 | 6.776014 | 73.78422 | 3.74E-06 | 4.94E-05 | 8 |
| 285331_at | 285331 | ENSG000001CCDC66    | coiled-coil domain con    | 11  | 0.73549   | 0.852856 | 1.4422   | 0.997529 | 1.227845 | 5.834885 | 40.01468 | 3.35E-05 | 0.000243 | 8 |
| 51185_at  | 51185  | ENSG000001CRBN      | cereblon peptidase        | 29  | 0.850395  | 0.810676 | 1.19509  | 0.969177 | 1.119907 | 6.604153 | 75.29572 | 3.47E-06 | 4.73E-05 | 8 |
| 29896_at  | 29896  | ENSG000001TRA2A     | transformer 2 alpha hc    | 31  | 0.77945   | 0.747054 | 1.162261 | 0.981397 | 1.121166 | 7.466083 | 42.89846 | 2.62E-05 | 0.000202 | 8 |
| 56650_at  | 56650  | ENSG000001CLDND1    | claudin domain contai     | 19  | 0.786741  | 0.739586 | 1.253181 | 1.063131 | 1.109851 | 9.515343 | 105.6221 | 1.01E-06 | 2.09E-05 | 8 |
| 5515_at   | 5515   | ENSG000001PPP2CA    | protein phk phosphopr     | 26  | 0.935192  | 0.658066 | 1.292226 | 0.935802 | 1.107927 | 8.555141 | 67.88111 | 5.05E-06 | 6.10E-05 | 8 |
| 54664_at  | 54664  | ENSG000001TMEM106   | transmembrane protei      | 55  | 0.843446  | 0.619505 | 1.265681 | 0.972458 | 1.102765 | 7.331104 | 108.2434 | 9.27E-07 | 1.99E-05 | 8 |
| 6653_at   | 6653   | ENSG000001SORL1     | sortilin-rel transport    | 22  | 0.836113  | 0.671285 | 1.331432 | 1.128651 | 1.322404 | 4.89975  | 26.65507 | 0.000139 | 0.000729 | 8 |
| 145482_at | 145482 | ENSG000001PTGR2     | prostaglandin reducta     | 20  | 0.952815  | 0.663721 | 1.331834 | 1.044554 | 1.232828 | 4.364518 | 51.92115 | 1.33E-05 | 0.000122 | 8 |
| 57205_at  | 57205  | ENSG000001ATP10D    | ATPase, cla transport     | 33  | 0.887702  | 0.742425 | 1.136309 | 1.084679 | 1.252199 | 7.870632 | 87.70837 | 1.99E-06 | 3.23E-05 | 8 |
| 55914_at  | 55914  | ENSG000001ERBB2IP   | erb2 interacting prot     | 54  | 0.850225  | 0.562141 | 1.079847 | 1.135429 | 1.223492 | 4.77394  | 125.2078 | 5.44E-07 | 1.40E-05 | 8 |
| 2296_at   | 2296   | ENSG000001FOXCl     | forkhead box C1           | 33  | 0.646456  | 0.570527 | 1.106977 | 1.126451 | 1.241759 | 7.201312 | 26.39514 | 0.000144 | 0.000748 | 8 |
| 3977_at   | 3977   | ENSG000001LIFR      | leukemia ir Secreted      | 55  | 0.690198  | 0.626592 | 0.988723 | 1.114089 | 1.238408 | 4.427562 | 51.75657 | 1.34E-05 | 0.000122 | 8 |
| 55727_at  | 55727  | ENSG000001BTBD7     | BTB (POZ) domain con      | 54  | 1.107918  | 0.910437 | 0.898167 | 0.878319 | 1.195175 | 5.081841 | 89.4994  | 1.85E-06 | 3.07E-05 | 8 |
| 160418_at | 160418 | ENSG000001TMTc3     | transmembrane and te      | 44  | 1.051797  | 0.826834 | 0.934254 | 0.859252 | 1.184673 | 6.049469 | 88.93964 | 1.90E-06 | 3.11E-05 | 8 |
| 64897_at  | 64897  | ENSG000001C12orf43  | chromosome 12 open NI     | 22  | 1.028873  | 0.893013 | 0.933556 | 0.805427 | 1.108487 | 4.829253 | 112.7822 | 7.98E-07 | 1.80E-05 | 8 |
| 221830_at | 221830 | ENSG000001TWISTNB   | TWIST neighbor            | 33  | 1.009056  | 0.96017  | 0.877851 | 0.873839 | 1.069717 | 7.636516 | 84.48326 | 2.29E-06 | 3.57E-05 | 8 |
| 6867_at   | 6867   | ENSG000001TACC1     | transforming, acidic co   | 88  | 1.006696  | 0.936146 | 0.801753 | 0.834252 | 1.113714 | 7.443506 | 68.34367 | 4.93E-06 | 5.98E-05 | 8 |
| 222658_at | 222658 | ENSG000001KCTD20    | potassium ion channe      | 33  | 1.043403  | 0.953312 | 0.806023 | 0.918837 | 1.202509 | 4.11039  | 43.52324 | 2.49E-05 | 0.000194 | 8 |
| 51306_at  | 51306  | ENSG000001FAM13B    | family with sequence s    | 32  | 0.861358  | 1.006561 | 0.779593 | 0.854053 | 1.032092 | 6.30756  | 35.06959 | 5.34E-05 | 0.000346 | 8 |
| 23118_at  | 23118  | ENSG000001TAB2      | TGF-beta activated kin    | 40  | 0.913967  | 0.954746 | 0.799835 | 0.802042 | 1.032816 | 5.085743 | 92.88795 | 1.62E-06 | 2.81E-05 | 8 |
| 79646_at  | 79646  | ENSG000001PANK3     | pantothen kinase          | 29  | 0.820525  | 0.963086 | 0.829563 | 0.882632 | 1.09944  | 5.523055 | 79.8856  | 2.80E-06 | 4.07E-05 | 8 |
| 57606_at  | 57606  | ENSG000001SLAIN2    | SLAIN motif family, m     | 41  | 0.932517  | 0.909855 | 0.91253  | 0.800553 | 1.178511 | 7.052969 | 77.34224 | 3.15E-06 | 4.41E-05 | 8 |
| 5576_at   | 5576   | ENSG000001PRKAR2A   | protein kin kinase        | 31  | 0.92289   | 0.912328 | 0.793157 | 0.706443 | 1.060582 | 4.301382 | 48.05978 | 1.75E-05 | 0.00015  | 8 |
| 9352_at   | 9352   | ENSG000001TXN1L     | thioredoxin-like 1        | 15  | 0.891243  | 0.7755   | 1.000998 | 1.010669 | 0.930678 | 10.5458  | 75.09881 | 3.50E-06 | 4.75E-05 | 8 |
| 839_at    | 839    | ENSG000001CASP6     | caspase 6, peptidase      | 11  | 0.95781   | 0.707848 | 1.040966 | 0.941407 | 0.930472 | 8.020004 | 89.92678 | 1.82E-06 | 3.04E-05 | 8 |
| 64983_at  | 64983  | ENSG000001MRPL32    | mitochond Secreted        | 7   | 1.014404  | 0.657445 | 0.879623 | 0.939017 | 1.037113 | 9.129105 | 72.90054 | 3.90E-06 | 5.10E-05 | 8 |
| 90693_at  | 90693  | ENSG000001CCDC126   | coiled-coil domain con    | 33  | 0.856199  | 0.619296 | 0.842837 | 0.867028 | 1.095913 | 5.366709 | 62.00596 | 7.00E-06 | 7.67E-05 | 8 |
| 801_at    | 801    | NA CALM1            | calmodulin 1 (phosph      | 33  | 0.838861  | 0.926469 | 0.998342 | 1.005401 | 1.012085 | 10.35407 | 77.95919 | 3.06E-06 | 4.33E-05 | 8 |
| 256471_at | 256471 | ENSG000001MFS08     | major facili transport    | 42  | 0.984327  | 0.868251 | 1.038786 | 0.971714 | 1.007253 | 5.462696 | 82.61205 | 2.48E-06 | 3.74E-05 | 8 |
| 51000_at  | 51000  | ENSG000001SLC35B3   | solute carrier family 35  | 11  | 0.1093743 | 0.983779 | 1.03735  | 1.042254 | 1.093118 | 8.543495 | 45.63465 | 2.10E-05 | 0.000171 | 8 |
| 5754_at   | 5754   | ENSG000001PTK7      | PTK7 prote kinase         | 42  | 1.005105  | 1.038009 | 1.107174 | 0.927324 | 1.086836 | 4.463946 | 41.03715 | 3.07E-05 | 0.000228 | 8 |
| 11157_at  | 11157  | ENSG000001LSM6      | LSM6 homolog, U6 sm       | 16  | 0.913766  | 1.037915 | 1.066547 | 0.994356 | 1.030561 | 10.11762 | 115.5618 | 7.30E-07 | 1.69E-05 | 8 |
| 51637_at  | 51637  | ENSG000001C14orf166 | chromosome 14 open        | 5   | 0.940215  | 1.057023 | 1.02649  | 0.824651 | 1.039678 | 11.40939 | 74.00496 | 3.70E-06 | 4.90E-05 | 8 |
| 7430_at   | 7430   | ENSG000001EZR       | ezrin                     | 46  | 0.989354  | 0.993429 | 1.050698 | 0.793566 | 0.974996 | 7.429537 | 97.77534 | 1.34E-06 | 2.47E-05 | 8 |
| 23389_at  | 23389  | ENSG000001MED13L    | mediator complex sub      | 20  | 1.015881  | 1.090604 | 0.975412 | 0.835073 | 1.140913 | 6.931676 | 59.18862 | 8.28E-06 | 8.60E-05 | 8 |
| 286148_at | 286148 | ENSG000001DPY19L4   | dpy-19-like 4 (C. eleg    | 16  | 1.110157  | 0.925296 | 1.006762 | 0.925285 | 0.843461 | 6.181341 | 51.38453 | 1.38E-05 | 0.000125 | 8 |
| 23392_at  | 23392  | ENSG000001KIAA0368  | KIAA0368                  | 20  | 1.031863  | 0.882019 | 1.009018 | 0.902845 | 0.826398 | 6.179934 | 31.28534 | 7.97E-05 | 0.000473 | 8 |
| 3017_at   | 3017   | ENSG000001HIST1H2BC | histone cluster 1, H2b    | 32  | 1.108433  | 0.800595 | 1.05306  | 1.015877 | 0.916844 | 7.797991 | 62.79122 | 6.69E-06 | 7.44E-05 | 8 |
| 84671_at  | 84671  | ENSG000001ZNF347    | zinc finger protein 347   | 22  | 1.134382  | 0.756508 | 0.86284  | 0.90342  | 0.961551 | 3.507077 | 74.18201 | 3.66E-06 | 4.89E-05 | 8 |
| 23228_at  | 23228  | ENSG000001PLCL2     | phospholipase C-like 2    | 11  | 1.143741  | 0.739576 | 1.004999 | 0.835569 | 0.892497 | 3.620338 | 23.18319 | 0.000225 | 0.001066 | 8 |
| 91351_at  | 91351  | ENSG000001DDX60L    | DEAD (Asp-Glu-Ala-As      | 11  | 1.162985  | 0.967614 | 0.942507 | 0.833052 | 0.975213 | 6.944076 | 43.42745 | 2.51E-05 | 0.000195 | 8 |
| 26127_at  | 26127  | ENSG000001FGFR1OP2  | FGFR1 oncogene partn      | 33  | 0.959862  | 0.865667 | 1.192767 | 0.863424 | 0.892429 | 6.700824 | 86.73164 | 2.08E-06 | 3.33E-05 | 8 |
| 91298_at  | 91298  | ENSG000001C12orf29  | chromosome 12 open        | 14  | 1.032294  | 0.905727 | 1.153329 | 0.814346 | 0.857692 | 9.098284 | 82.22692 | 2.52E-06 | 3.79E-05 | 8 |
| 8091_at   | 8091   | ENSG000001HMG2      | high mobility group AT    | 24  | 0.960964  | 0.788719 | 1.176142 | 0.801549 | 0.815734 | 5.6      |          |          |          |   |

|           |        |                    |                             |    |          |          |          |          |          |          |          |          |          |   |
|-----------|--------|--------------------|-----------------------------|----|----------|----------|----------|----------|----------|----------|----------|----------|----------|---|
| 55844_at  | 55844  | ENSG000001PPP2R2D  | protein phosphatase 2 I     | 9  | 0.902805 | 0.942937 | 1.064666 | 0.76472  | 0.669794 | 7.217276 | 33.93505 | 6.00E-05 | 0.000379 | 8 |
| 51143_at  | 51143  | ENSG000001DYNC1LI1 | dynein, cyt Secreted I      | 18 | 0.863812 | 0.842888 | 1.090305 | 0.823471 | 0.677152 | 7.962499 | 59.86632 | 7.95E-06 | 8.35E-05 | 8 |
| 57619_at  | 57619  | ENSG000001SHROOM3  | shroom family membe NI      | 55 | 0.867244 | 0.900193 | 1.067528 | 0.714297 | 1.047465 | 5.281615 | 25.38971 | 0.000165 | 0.000829 | 8 |
| 3099_at   | 3099   | ENSG000001HK2      | hexokinase kinase I         | 10 | 0.826862 | 0.931672 | 1.110972 | 0.686703 | 0.902315 | 8.369398 | 26.01929 | 0.000151 | 0.000777 | 8 |
| 122769_at | 122769 | ENSG000001LRR1     | leucine rich repeat pro I   | 11 | 0.68872  | 0.781992 | 0.992738 | 0.619065 | 1.02844  | 8.692427 | 51.34938 | 1.38E-05 | 0.000125 | 8 |
| 132949_at | 132949 | ENSG000001AASDH    | aminoadipate-semiald NI     | 30 | 0.845268 | 0.925609 | 1.257422 | 0.665522 | 1.117129 | 6.029962 | 72.64036 | 3.95E-06 | 5.14E-05 | 8 |
| 63932_at  | 63932  | ENSG000001CXorf56  | chromosome X open r NI      | 9  | 0.617323 | 0.950011 | 1.17348  | 0.576669 | 1.100449 | 5.007666 | 22.92349 | 0.000234 | 0.001099 | 8 |
| 163_at    | 163    | ENSG000001AP2B1    | adaptor-related protei I    | 15 | 0.750015 | 0.94494  | 1.037728 | 1.031884 | 0.868546 | 9.007544 | 61.68325 | 7.14E-06 | 7.75E-05 | 8 |
| 334_at    | 334    | ENSG000001APLP2    | amyloid beta (A4) prec I    | 43 | 0.79476  | 0.956897 | 1.028262 | 1.014519 | 0.77053  | 10.3996  | 47.11907 | 1.87E-05 | 0.000157 | 8 |
| 9592_at   | 9592   | ENSG000001IER2     | immediate early respo I     | 8  | 0.642126 | 1.022071 | 1.141483 | 1.035184 | 0.744405 | 9.66464  | 88.71617 | 1.91E-06 | 3.12E-05 | 8 |
| 4323_at   | 4323   | ENSG000001MMP14    | matrix met peptidase I      | 42 | 0.737507 | 1.041597 | 1.03155  | 1.018891 | 0.727143 | 7.327641 | 54.31341 | 1.13E-05 | 0.000108 | 8 |
| 51123_at  | 51123  | ENSG000001ZNF706   | zinc finger protein 706 I   | 13 | 0.603656 | 0.942634 | 1.037356 | 0.910435 | 0.884441 | 7.620156 | 64.13748 | 6.20E-06 | 7.04E-05 | 8 |
| 51194_at  | 51194  | ENSG000001IPO1     | importin 1: transporte NI   | 19 | 0.595162 | 1.018103 | 1.010482 | 0.913041 | 0.807262 | 5.8013   | 71.19866 | 4.25E-06 | 5.40E-05 | 8 |
| 55352_at  | 55352  | ENSG000001C17orf79 | chromosome 17 open I        | 10 | 0.652444 | 0.864033 | 1.069236 | 0.978876 | 0.892447 | 9.573274 | 47.90092 | 1.77E-05 | 0.000151 | 8 |
| 55692_at  | 55692  | ENSG000001LUC7L    | LUC7-like (S. cerevisiae I  | 43 | 0.674681 | 0.835994 | 1.01399  | 0.94612  | 0.923125 | 7.015967 | 51.6877  | 1.35E-05 | 0.000123 | 8 |
| 3927_at   | 3927   | ENSG000001LASP1    | LIM and SH transporte I     | 28 | 0.781409 | 0.856267 | 1.130533 | 0.907202 | 0.853066 | 8.810634 | 71.08033 | 4.28E-06 | 5.42E-05 | 8 |
| 51373_at  | 51373  | NA MRPS17          | mitochondrial ribosomr I    | 10 | 0.589621 | 0.93222  | 1.139769 | 0.940845 | 0.685998 | 9.400925 | 68.4194  | 4.91E-06 | 5.97E-05 | 8 |
| 26020_at  | 26020  | ENSG000001LRP10    | low density lipoprotein I   | 11 | 0.596461 | 0.927604 | 1.062644 | 1.018401 | 0.679267 | 7.00011  | 42.8438  | 2.63E-05 | 0.000203 | 8 |
| 23390_at  | 23390  | ENSG000001ZDHC17   | zinc finger, DHHC-type NI   | 41 | 0.751768 | 0.93844  | 1.169044 | 0.954806 | 0.624702 | 4.246443 | 43.40268 | 2.51E-05 | 0.000196 | 8 |
| 5478_at   | 5478   | ENSG000001PPIA     | peptidylprolyl isomera I    | 40 | 0.782048 | 0.856536 | 1.285672 | 0.98764  | 1.008157 | 5.180326 | 79.15946 | 2.90E-06 | 4.17E-05 | 8 |
| 643641_at | 643641 | ENSG000001ZNF862   | zinc finger protein 862 NI  | 11 | 0.779767 | 0.902836 | 1.257188 | 0.951742 | 0.947259 | 4.024685 | 67.41351 | 5.18E-06 | 6.20E-05 | 8 |
| 23186_at  | 23186  | ENSG000001RCOR1    | REST corepressor 1 I        | 22 | 0.764333 | 0.982204 | 1.266118 | 1.036246 | 0.956287 | 4.548983 | 77.04024 | 3.19E-06 | 4.46E-05 | 8 |
| 57110_at  | 57110  | ENSG000001HRASLS   | HRAS-like suppressor NI     | 9  | 0.866388 | 0.778197 | 1.1731   | 1.142168 | 0.791316 | 4.412472 | 16.45494 | 0.000715 | 0.00273  | 8 |
| 929_at    | 929    | ENSG000001CD14     | CD14 mole Secreted NI       | 22 | 0.874079 | 0.778959 | 1.2842   | 1.032267 | 0.76413  | 3.804328 | 103.9367 | 1.07E-06 | 2.18E-05 | 8 |
| 9645_at   | 9645   | ENSG000001MICAL2   | microtubule associater I    | 31 | 0.981431 | 1.309646 | 1.162477 | 0.925821 | 0.788567 | 5.412804 | 102.3293 | 1.14E-06 | 2.24E-05 | 8 |
| 221710_at | 221710 | NA LOC221710       | hypothetical protein L I    | 43 | 0.928502 | 1.293553 | 1.09018  | 0.982665 | 0.828969 | 6.362522 | 55.96904 | 1.01E-05 | 9.97E-05 | 8 |
| 50810_at  | 50810  | ENSG000001HDGFRP3  | hepatoma-derived gro I      | 10 | 0.866788 | 1.206478 | 1.206615 | 1.040413 | 0.840351 | 7.59348  | 88.74742 | 1.91E-06 | 3.12E-05 | 8 |
| 323_at    | 323    | ENSG000001APBB2    | amyloid beta (A4) prec I    | 74 | 0.904773 | 1.198648 | 1.095162 | 1.009386 | 0.922351 | 6.567254 | 101.2574 | 1.18E-06 | 2.29E-05 | 8 |
| 1119_at   | 1119   | ENSG000001CHKA     | choline kin kinase I        | 18 | 0.952415 | 1.06394  | 1.258782 | 1.018213 | 0.760426 | 7.120669 | 90.01597 | 1.81E-06 | 3.03E-05 | 8 |
| 5528_at   | 5528   | ENSG000001PPP2R5D  | protein phosphatase 2 I     | 47 | 0.855617 | 1.065268 | 1.176284 | 0.971763 | 0.746449 | 6.102655 | 56.41658 | 9.84E-06 | 9.77E-05 | 8 |
| 10667_at  | 10667  | ENSG000001FARS2    | phenylalanyl-tRNA syn I     | 20 | 0.975612 | 1.105705 | 1.162384 | 0.948673 | 0.614269 | 6.249648 | 93.08277 | 1.61E-06 | 2.80E-05 | 8 |
| 5910_at   | 5910   | ENSG000001RAP1GDS1 | RAP1, GTP-GDP dissoc I      | 31 | 0.981117 | 1.220376 | 0.926352 | 1.014766 | 0.64717  | 7.79192  | 96.5891  | 1.40E-06 | 2.55E-05 | 8 |
| 3628_at   | 3628   | ENSG000001INPP1    | inositol polyphosphate I    | 11 | 0.892564 | 1.141247 | 0.944746 | 1.083865 | 0.628282 | 8.556818 | 92.47282 | 1.65E-06 | 2.84E-05 | 8 |
| 7052_at   | 7052   | ENSG000001TGM2     | transglutaminase 2 (C I     | 44 | 1.002695 | 1.226522 | 1.051384 | 1.170452 | 0.701108 | 4.927631 | 106.4735 | 9.84E-07 | 2.05E-05 | 8 |
| 572_at    | 572    | ENSG000001BAD      | BCL2-associated agoniz I    | 21 | 0.68367  | 1.265201 | 1.120705 | 1.135052 | 0.731452 | 8.124562 | 94.0561  | 1.55E-06 | 2.71E-05 | 8 |
| 7263_at   | 7263   | ENSG000001TST      | thiosulfate sulfurtransf I  | 11 | 0.832031 | 1.266929 | 1.119317 | 1.077434 | 0.615785 | 8.100849 | 112.785  | 7.97E-07 | 1.80E-05 | 8 |
| 2026_at   | 2026   | ENSG000001ENO2     | enolase 2 (gamma, nei NI    | 11 | 0.624867 | 1.080213 | 1.123584 | 1.226878 | 0.566344 | 5.254124 | 74.41142 | 3.62E-06 | 4.85E-05 | 8 |
| 84498_at  | 84498  | ENSG000001FAM120B  | family with Secreted NI     | 32 | 0.88435  | 1.112245 | 0.935413 | 1.149319 | 0.908773 | 4.87827  | 75.93084 | 3.37E-06 | 4.63E-05 | 8 |
| 51562_at  | 51562  | ENSG000001MBIP     | MAP3K12 binding inhil I     | 20 | 0.896986 | 1.155157 | 0.86263  | 1.10334  | 0.880185 | 7.928363 | 118.1133 | 6.74E-07 | 1.60E-05 | 8 |
| 136_at    | 136    | ENSG000001ADORA2B  | adenosine G-protein c I     | 11 | 0.975376 | 1.146511 | 0.867232 | 1.070605 | 0.956789 | 10.69354 | 59.73643 | 8.01E-06 | 8.39E-05 | 8 |
| 1161_at   | 1161   | ENSG000001ERCC8    | excision repair cross-cr NI | 56 | 1.023636 | 1.095775 | 0.737761 | 1.132186 | 0.961885 | 5.73679  | 71.63568 | 4.16E-06 | 5.32E-05 | 8 |
| 374969_at | 374969 | ENSG000001CCDC23   | coiled-coil domain con I    | 9  | 0.895181 | 1.086253 | 0.904186 | 0.993491 | 1.069135 | 7.722192 | 64.47174 | 6.08E-06 | 6.97E-05 | 8 |
| 5939_at   | 5939   | ENSG000001RBMS2    | RNA binding motif, sin NI   | 74 | 1.017484 | 1.03677  | 0.855671 | 0.985287 | 1.009876 | 4.351387 | 73.76181 | 3.74E-06 | 4.95E-05 | 8 |
| 10455_at  | 10455  | ENSG000001ECI2     | enoyl-CoA delta isome I     | 11 | 0.999723 | 1.098133 | 0.924666 | 0.977266 | 0.936152 | 10.72131 | 96.08964 | 1.43E-06 | 2.58E-05 | 8 |
| 6636_at   | 6636   | ENSG000001SNRPF    | small nuclear ribonuck I    | 22 | 0.931743 | 1.094093 | 0.946744 | 0.954581 | 0.91183  | 10.38703 | 114.0212 | 7.66E-07 | 1.76E-05 | 8 |
| 55304_at  | 55304  | ENSG000001SPTLC3   | serine palmitoyltransf I    | 20 | 0.951361 | 0.909304 | 1.017067 | 1.051895 | 0.861876 | 4.419349 | 74.12564 | 3.67E-06 | 4.90E-05 | 8 |
| 78990_at  | 78990  | ENSG000001OTUB2    | OTU domain peptidase NI     | 31 | 0.894715 | 0.937351 | 0.932733 | 1.08354  | 0.810511 | 4.478655 | 64.45369 | 6.09E-06 | 6.97E-05 | 8 |
| 63933_at  | 63933  | ENSG000001CCDC90A  | coiled-coil Secreted I      | 8  | 0.947541 | 0.919263 | 0.93667  | 1.15066  | 0.991889 | 9.343092 | 97.60176 | 1.35E-06 | 2.48E-05 | 8 |
| 4832_at   | 4832   | ENSG000001NME3     | non-metaz kinase I          | 11 | 0.784649 | 1.04485  | 1.20767  | 1.142573 | 0.873059 | 7.387143 | 50.94863 | 1.42E-05 | 0.000127 | 8 |
| 4267_at   | 4267   | ENSG000001CD99     | CD99 molecule I             | 25 | 0.818998 | 1.037296 | 1.082956 | 1.131973 | 0.833755 | 9.128224 | 64.25239 | 6.16E-06 | 7.02E-05 | 8 |
| 7050_at   | 7050   | ENSG000001TGIF1    | TGFB-induced factor h I     | 17 | 0.776581 | 1.116408 | 1.119425 | 1.255614 | 0.961222 | 7.911269 | 106.1598 | 9.95E-07 | 2.07E-05 | 8 |
| 2941_at   | 2941   | ENSG000001GSTA4    | glutathione S-transfer: I   | 44 | 0.881675 | 1.109199 | 0.950809 | 1.315935 | 0.957156 | 74.02008 | 3.69E-06 | 4.90E-05 | 8        |   |
| 5641_at   | 5641   | ENSG000001LGMN     | legumain peptidase I        | 39 | 0.677279 | 1.078994 | 0.923556 | 1.27004  | 0.797258 | 8.283662 | 102.5947 | 1.13E-06 | 2.23E-05 | 8 |
| 23113_at  | 23113  | ENSG000001CUL9     | cullin 9 I                  | 10 | 1.08293  | 1.039522 | 0.867706 | 1.492013 | 0.896369 | 5.889965 | 78.75894 | 2.95E-06 | 4.22E-05 | 8 |
| 55743_at  | 55743  | ENSG000001CHFR     | checkpoint with forkhe I    | 18 | 1.136865 | 0.752502 | 1.029416 | 1.075016 | 0.723149 | 4.148688 | 52.78656 | 1.25E-05 | 0.000116 | 8 |
| 4756_at   | 4756   | ENSG000001NEO1     | neogenin 1 NI               | 32 | 1.075901 | 0.812098 | 0.856027 | 1.046027 | 0.679023 | 4.146651 | 85.253   | 2.21E-06 | 3.49E-05 | 8 |
| 7108_at   | 7108   | ENSG000001TM7SF2   | transmembrane 7 supt NI     | 34 | 0.86482  | 0.814503 | 1.028289 | 1.112265 | 0.657782 | 4.982123 | 30.73237 | 8.48E-05 | 0.000496 | 8 |
| 284611_at | 284611 | ENSG000001FAM102B  | family with sequence : NI   | 32 | 0.871343 | 0.907383 | 0.864261 | 1.089293 | 0.528786 | 4.340075 | 35.06968 | 5.34E-05 | 0.000346 | 8 |
| 439921_at | 439921 | ENSG000001MXRA7    | matrix-remodelling as: I    | 22 | 0.93529  | 1.296233 | 1.497147 | 1.346901 | 0.993754 | 5.707048 | 119.1354 | 6.53E-07 | 1.58E-05 | 8 |
| 3159_at   | 3159   | ENSG000001HMGA1    | high mobility group AT I    | 7  | 0.993573 | 1.350267 | 1.309647 | 1.286594 | 0.933198 | 7.814612 | 98.61169 | 1.30E-06 | 2.41E-05 | 8 |
| 54206_at  | 54206  | ENSG000001ERRF1    | ERBB receptor feedbac I     | 11 | 1.050981 | 1.224849 | 1.251851 | 1.341336 | 1.061395 | 12.04653 | 131.9662 | 4.49E-07 | 1.23E-05 | 8 |
| 1471_at   | 1471   | ENSG000001CST3     | cystatin C Secreted I       | 20 | 0.966274 | 1.145412 | 1.322764 | 1.371454 | 1.058561 | 10.21393 | 174.0538 | 1.63E-07 | 6.81E-06 | 8 |
| 84329_at  | 84329  | ENSG000001HVCN1    | hydrogen vion channe NI     | 20 | 0.778591 | 1.145058 | 1.404479 | 1.239333 | 0.991876 | 4.51006  | 109.1923 | 8.98E-07 | 1.96E-05 | 8 |
| 10903_at  | 10903  | ENSG000001MTMR11   | myotubularin related f NI   | 39 | 0.699715 | 1.407373 | 1.187759 | 1.256988 | 0.989413 | 4.945266 | 62.91331 | 6.65E-06 | 7.40E-05 | 8 |
| 8601_at   | 8601   | ENSG000001RGS20    | regulator o Secreted I      | 11 | 0.883577 | 1.073608 | 1.449721 | 1.160109 | 0.825327 | 6.145658 | 72.49737 | 3.98E-06 | 5.17E-05 | 8 |
| 3918_at   | 3918   | ENSG000001LAMC2    | laminin, ga Secreted I      | 76 | 0.898004 | 0.86011  | 1.42204  | 1.078756 | 0.813248 | 4.583698 | 76.62062 | 3.26E-06 | 4.52E-05 | 8 |
| 55568_at  | 55568  | ENSG000001GALNT10  | UDP-N-ace Secreted I        | 11 | 1.069175 | 0.886484 | 1.361543 | 1.174363 | 0.70436  | 6.732627 | 16.01975 | 0.000781 | 0.002932 | 8 |
| 8841_at   | 8841   | ENSG000001HDAC3    | histone deacetylase 3 I     | 11 | 0.788874 | 0.792135 | 1.392239 | 1.323051 | 0.8915   | 6.066011 | 82.8     |          |          |   |

|           |        |                    |                         |    |    |          |          |          |          |          |          |          |          |          |   |
|-----------|--------|--------------------|-------------------------|----|----|----------|----------|----------|----------|----------|----------|----------|----------|----------|---|
| 1875_at   | 1875   | ENSG000001E2F5     | E2F transcription facto | I  | 11 | 0.455338 | 0.844183 | 1.047857 | 0.683999 | 0.641868 | 7.989118 | 33.13165 | 6.52E-05 | 0.000404 | 8 |
| 7097_at   | 7097   | ENSG000001TLR2     | toll-like receptor 2    | NI | 32 | 0.464338 | 0.901499 | 1.085178 | 0.844944 | 0.529292 | 3.767187 | 70.24784 | 4.46E-06 | 5.58E-05 | 8 |
| 27344_at  | 27344  | ENSG000001PCSK1N   | proprotein Secreted     | NI | 16 | 0.550283 | 0.726584 | 1.167492 | 0.916488 | 0.431825 | 4.164328 | 41.83307 | 2.86E-05 | 0.000216 | 8 |
| 122970_at | 122970 | ENSG000001ACOT4    | acyl-CoA thioesterase   | NI | 11 | 0.522404 | 0.579844 | 1.127499 | 0.845406 | 0.523161 | 3.464576 | 12.92236 | 0.001574 | 0.005265 | 8 |
| 80741_at  | 80741  | NA LY6G5C          | lymphocytr Secreted     | NI | 11 | 0.513562 | 0.776386 | 1.326996 | 0.923074 | 0.638689 | 3.783658 | 20.7054  | 0.000331 | 0.001453 | 8 |
| 4041_at   | 4041   | ENSG000001LRP5     | low density lipoprotein | NI | 10 | 0.424483 | 0.799966 | 1.388186 | 0.996398 | 0.542186 | 4.735077 | 32.08088 | 7.30E-05 | 0.000442 | 8 |
| 6414_at   | 6414   | ENSG000001SEPP1    | selenoprot Secreted     | I  | 22 | 0.581511 | 0.629045 | 1.405355 | 1.22262  | 1.286198 | 3.769952 | 102.8349 | 1.12E-06 | 2.22E-05 | 8 |
| 51170_at  | 51170  | ENSG000001HSD17B11 | hydroxyste Secreted     | I  | 22 | 0.472397 | 0.600326 | 1.311586 | 1.186829 | 1.473944 | 9.147424 | 62.5397  | 6.79E-06 | 7.51E-05 | 8 |
| 3149_at   | 3149   | ENSG000001HMGCB3   | high mobility group bo  | I  | 10 | 0.288743 | 0.864507 | 1.254175 | 1.345246 | 1.245113 | 6.11588  | 20.20995 | 0.000359 | 0.001552 | 8 |
| 650_at    | 650    | ENSG000001BMP2     | bone morp Secreted      | I  | 22 | 0.424507 | 0.550609 | 1.539031 | 1.411315 | 1.174134 | 4.411916 | 47.96108 | 1.76E-05 | 0.00015  | 8 |
| 57584_at  | 57584  | ENSG000001ARHGAP21 | Rho GTPase activating   | I  | 5  | 0.462746 | 0.47473  | 1.315974 | 1.237048 | 1.022573 | 5.741697 | 38.18842 | 3.95E-05 | 0.000276 | 8 |
| 23234_at  | 23234  | ENSG000001DNAJC9   | DnaJ (Hsp40) homolog    | I  | 4  | 0.590496 | 0.548863 | 0.794126 | 1.090106 | 1.041497 | 8.571886 | 86.72355 | 2.08E-06 | 3.33E-05 | 8 |
| 4008_at   | 4008   | ENSG000001LMO7     | LIM domain 7            | NI | 32 | 0.430629 | 0.584405 | 0.954422 | 1.041598 | 0.983351 | 5.824448 | 48.26771 | 1.72E-05 | 0.000148 | 8 |
| 84190_at  | 84190  | ENSG000001C12orf26 | chromosome 12 open      | NI | 6  | 0.484118 | 0.374764 | 0.910638 | 1.223447 | 0.915229 | 4.636475 | 15.10339 | 0.000948 | 0.003445 | 8 |
| 79582_at  | 79582  | ENSG000001SPAG16   | sperm associated antiq  | NI | 21 | 0.954815 | 0.579977 | 1.083532 | 1.224891 | 0.835664 | 4.002083 | 51.59303 | 1.36E-05 | 0.000123 | 8 |
| 6916_at   | 6916   | ENSG000001TBXAS1   | thromboxa Secreted      | NI | 23 | 0.549847 | 0.700089 | 1.008506 | 1.276873 | 0.710613 | 4.400403 | 68.77092 | 4.82E-06 | 5.89E-05 | 8 |
| 9748_at   | 9748   | ENSG000001SLK      | STE20-like kinase       | I  | 33 | 0.812945 | 0.742807 | 1.031641 | 1.088927 | 1.121695 | 6.733046 | 98.94109 | 1.29E-06 | 2.40E-05 | 8 |
| 79682_at  | 79682  | ENSG000001MLF1IP   | MLF1 interacting prote  | I  | 19 | 0.821491 | 0.717899 | 0.954538 | 1.054358 | 1.159746 | 7.987418 | 30.80051 | 8.42E-05 | 0.000493 | 8 |
| 2739_at   | 2739   | ENSG000001GLO1     | glyoxalase I            | I  | 41 | 0.791127 | 0.786533 | 1.014246 | 1.045348 | 1.201078 | 9.459718 | 62.41747 | 6.84E-06 | 7.55E-05 | 8 |
| 54764_at  | 54764  | ENSG000001ZNRANB1  | zinc finger, RAN-bindir | I  | 44 | 0.766736 | 0.903397 | 0.995833 | 1.006515 | 1.209499 | 5.334592 | 96.18155 | 1.43E-06 | 2.57E-05 | 8 |
| 6605_at   | 6605   | ENSG000001SMARCE1  | SWI/SNF related, matr   | I  | 43 | 0.710831 | 0.813748 | 1.08916  | 1.023307 | 1.241753 | 8.485699 | 67.0873  | 5.27E-06 | 6.27E-05 | 8 |
| 5782_at   | 5782   | ENSG000001PTPN12   | protein tyrn phosphopr  | I  | 30 | 0.885708 | 0.922859 | 0.998287 | 1.198333 | 1.24786  | 9.489418 | 116.9549 | 6.98E-07 | 1.64E-05 | 8 |
| 23358_at  | 23358  | ENSG000001USP24    | ubiquitin sJ peptidase  | I  | 22 | 0.810294 | 0.957114 | 1.048782 | 1.157462 | 1.223202 | 7.371991 | 61.09555 | 7.39E-06 | 7.95E-05 | 8 |
| 6760_at   | 6760   | ENSG000001SS18     | synovial sarcoma trans  | I  | 64 | 0.901893 | 0.977795 | 1.083655 | 1.02737  | 1.258596 | 7.945815 | 124.552  | 5.55E-07 | 1.42E-05 | 8 |
| 8562_at   | 8562   | ENSG000001DENR     | density-regulated prot  | I  | 16 | 0.88756  | 0.944008 | 0.88539  | 1.073313 | 1.159416 | 9.830083 | 126.9206 | 5.18E-07 | 1.35E-05 | 8 |
| 51167_at  | 51167  | ENSG000001CYBSR4   | cytochrome b5 reduct:   | I  | 10 | 0.839285 | 0.795984 | 0.907458 | 1.001605 | 1.21932  | 7.919025 | 49.63792 | 1.56E-05 | 0.000137 | 8 |
| 23255_at  | 23255  | ENSG000001CCDC165  | coiled-coil domain con  | I  | 6  | 0.795435 | 0.74325  | 0.771597 | 1.031119 | 1.306923 | 7.910423 | 44.14529 | 2.36E-05 | 0.000186 | 8 |
| 54876_at  | 54876  | ENSG000001DCAF16   | DDb1 and CUL4 associ    | I  | 44 | 0.766859 | 0.816441 | 0.904302 | 1.012759 | 1.398676 | 6.737875 | 82.09505 | 2.54E-06 | 3.80E-05 | 8 |
| 23001_at  | 23001  | ENSG000001WDFY3    | WD repeat and FYVE d    | I  | 63 | 0.940941 | 0.868303 | 1.090493 | 0.863103 | 1.241774 | 5.646595 | 70.93895 | 4.31E-06 | 5.43E-05 | 8 |
| 63979_at  | 63979  | ENSG000001FIGNL1   | fidgetin-like 1         | I  | 11 | 0.9625   | 0.89787  | 1.06131  | 0.789361 | 1.135044 | 7.745009 | 54.14607 | 1.14E-05 | 0.000109 | 8 |
| 1946_at   | 1946   | ENSG000001EFNA5    | ephrin-A5 Secreted      | I  | 33 | 1.169418 | 0.837526 | 1.099415 | 0.937565 | 1.14017  | 5.565907 | 107.237  | 9.59E-07 | 2.03E-05 | 8 |
| 5412_at   | 5412   | ENSG000001UBL3     | ubiquitin-like 3        | I  | 30 | 0.997776 | 0.636292 | 1.060521 | 0.88     | 1.2598   | 6.878054 | 31.8759  | 7.47E-05 | 0.000449 | 8 |
| 4628_at   | 4628   | ENSG000001MYH10    | myosin, heavy chain 1I  | I  | 29 | 1.047834 | 0.702342 | 1.057251 | 0.784552 | 1.114139 | 5.046559 | 48.33602 | 1.71E-05 | 0.000148 | 8 |
| 90355_at  | 90355  | ENSG000001C5orf30  | chromosome 5 open r     | I  | 11 | 1.021961 | 0.745121 | 1.158136 | 1.008001 | 1.485292 | 6.420973 | 54.69906 | 1.10E-05 | 0.000106 | 8 |
| 55206_at  | 55206  | ENSG000001SBN01    | strawberry notch hom    | I  | 39 | 0.937127 | 0.70259  | 1.0907   | 0.840379 | 1.453252 | 7.117531 | 74.41182 | 3.62E-06 | 4.85E-05 | 8 |
| 57381_at  | 57381  | ENSG000001RHOJ     | ras homolc GTPase       | I  | 29 | 1.044983 | 0.705194 | 0.995826 | 1.276698 | 1.412436 | 5.769563 | 27.37972 | 0.000127 | 0.000678 | 8 |
| 4306_at   | 4306   | ENSG000001NR3C2    | nuclear rec nuclear rec | I  | 22 | 1.029066 | 0.668202 | 1.077809 | 1.337921 | 1.181885 | 3.721503 | 19.62735 | 0.000393 | 0.001675 | 8 |
| 116984_at | 116984 | ENSG000001ARAP2    | ArfGAP with RhoGAP c    | NI | 21 | 1.035586 | 0.82517  | 0.838073 | 1.102478 | 1.169221 | 3.515428 | 83.32885 | 2.40E-06 | 3.67E-05 | 8 |
| 100113407 | 1E+08  | ENSG000001TMEM170  | transmembrane protei    | I  | 11 | 1.131607 | 0.670749 | 0.79631  | 1.126341 | 1.142158 | 4.828794 | 27.29752 | 0.000128 | 0.000683 | 8 |
| 25945_at  | 25945  | ENSG000001PVR13    | poliovirus receptor-rel | I  | 11 | 1.106158 | 0.99106  | 0.892585 | 1.122071 | 1.481486 | 8.744256 | 117.5929 | 6.85E-07 | 1.62E-05 | 8 |
| 23052_at  | 23052  | ENSG000001ENDOD1   | endonuclease domain     | I  | 22 | 1.170181 | 0.875087 | 0.959282 | 1.115693 | 1.337837 | 6.755804 | 49.56126 | 1.57E-05 | 0.000138 | 8 |
| 153642_at | 153642 | ENSG000001ARSK     | arylsulfatase family, m | I  | 30 | 1.089233 | 0.88918  | 0.732393 | 1.255692 | 1.455686 | 5.200865 | 90.06352 | 1.81E-06 | 3.03E-05 | 8 |
| 154007_at | 154007 | ENSG000001SNRNP48  | small nuclear ribonucle | NI | 33 | 0.66378  | 0.504569 | 0.873532 | 0.737594 | 1.193572 | 5.742704 | 49.31624 | 1.59E-05 | 0.00014  | 8 |
| 6198_at   | 6198   | ENSG000001RPS6KB1  | ribosomal J kinase      | NI | 23 | 0.630254 | 0.562579 | 0.939323 | 0.697893 | 1.108706 | 6.216373 | 58.2537  | 8.77E-06 | 8.97E-05 | 8 |
| 148534_at | 148534 | ENSG000001TMEM56   | transmembrane protei    | NI | 33 | 0.595329 | 0.640346 | 0.918487 | 0.715574 | 1.235079 | 4.610901 | 19.41662 | 0.000411 | 0.001735 | 8 |
| 7443_at   | 7443   | ENSG000001VRK1     | vaccinia rel kinase     | I  | 9  | 0.61978  | 0.502514 | 1.021656 | 0.806398 | 1.199403 | 8.537943 | 19.7208  | 0.00039  | 0.001664 | 8 |
| 29957_at  | 29957  | ENSG000001SLC25A24 | solute carri Secreted   | I  | 22 | 0.580127 | 0.501276 | 0.944358 | 0.856988 | 1.175996 | 6.653699 | 58.98327 | 8.38E-06 | 8.69E-05 | 8 |
| 11103_at  | 11103  | ENSG000001KRR1     | KRR1, small subunit (S  | I  | 41 | 0.741583 | 0.71148  | 0.887324 | 0.893228 | 1.139782 | 7.77699  | 82.05337 | 2.54E-06 | 3.81E-05 | 8 |
| 58478_at  | 58478  | ENSG000001ENOPH1   | enolase-phosphatase     | I  | 19 | 0.660226 | 0.766178 | 0.883593 | 0.898257 | 1.123832 | 8.303288 | 98.63158 | 1.30E-06 | 2.41E-05 | 8 |
| 27246_at  | 27246  | ENSG000001RNF115   | ring finger protein 115 | I  | 11 | 0.731944 | 0.647766 | 0.866549 | 0.858049 | 1.013488 | 7.301512 | 77.31543 | 3.15E-06 | 4.42E-05 | 8 |
| 373_at    | 373    | ENSG000001TRIM23   | tripartite r GTPase     | NI | 49 | 0.69555  | 0.630204 | 0.912381 | 0.832714 | 1.026792 | 5.006841 | 80.5509  | 2.72E-06 | 3.99E-05 | 8 |
| 5501_at   | 5501   | ENSG000001PPP1CC   | protein phJ phosphopr   | I  | 33 | 0.553458 | 0.553819 | 0.820376 | 0.872407 | 1.022169 | 11.06969 | 46.61347 | 1.95E-05 | 0.000161 | 8 |
| 9787_at   | 9787   | ENSG000001DLGAP5   | discs, large phosphopr  | I  | 20 | 0.477465 | 0.608169 | 0.819039 | 0.836264 | 1.05327  | 9.64841  | 62.81094 | 6.68E-06 | 7.43E-05 | 8 |
| 5494_at   | 5494   | ENSG000001PPM1A    | protein phJ phosphopr   | NI | 54 | 0.562851 | 0.585984 | 0.859796 | 0.810506 | 1.103869 | 5.790615 | 67.24447 | 5.23E-06 | 6.24E-05 | 8 |
| 5912_at   | 5912   | ENSG000001RAP2B    | RAP2B, member of RA     | NI | 31 | 0.580045 | 0.489702 | 0.80245  | 0.761663 | 1.083764 | 4.938989 | 43.91983 | 2.41E-05 | 0.000189 | 8 |
| 80829_at  | 80829  | NA ZFP91           | zinc finger protein 91  | I  | 21 | 0.596008 | 0.587031 | 0.707345 | 0.743856 | 1.028382 | 8.346303 | 59.9643  | 7.90E-06 | 8.32E-05 | 8 |
| 154043_at | 154043 | ENSG000001CNKSR3   | CNKSR family member     | I  | 11 | 0.698523 | 0.432197 | 0.67319  | 0.84469  | 1.093424 | 6.967408 | 19.48739 | 0.000406 | 0.001717 | 8 |
| 10520_at  | 10520  | ENSG000001ZNF211   | zinc finger protein 211 | NI | 22 | 0.672766 | 0.680481 | 1.044537 | 0.840692 | 1.290096 | 4.209515 | 55.28243 | 1.06E-05 | 0.000103 | 8 |
| 3895_at   | 3895   | ENSG000001KTN1     | kinctin 1 (kinesin rec  | I  | 89 | 0.651255 | 0.581326 | 1.045876 | 0.801469 | 1.429112 | 9.27302  | 81.714   | 2.58E-06 | 3.85E-05 | 8 |
| 80311_at  | 80311  | ENSG000001KLHL15   | kelch-like 15 (Drosoph  | I  | 11 | 0.775058 | 0.587823 | 0.959097 | 0.687803 | 1.4454   | 6.425049 | 46.61245 | 1.95E-05 | 0.000161 | 8 |
| 84162_at  | 84162  | ENSG000001KIAA1109 | KIAA1109                | I  | 32 | 0.57159  | 0.371704 | 1.093918 | 0.730902 | 1.319739 | 6.10369  | 55.48988 | 1.04E-05 | 0.000102 | 8 |
| 64332_at  | 64332  | ENSG000001NFKBIZ   | nuclear factor of kappa | I  | 11 | 0.6805   | 0.303223 | 1.021629 | 0.748213 | 1.303454 | 8.578746 | 10.19622 | 0.003327 | 0.009876 | 8 |
| 595_at    | 595    | ENSG000001CCND1    | cyclin D1               | I  | 43 | 0.583554 | 0.764856 | 0.795327 | 0.839889 | 1.466919 | 8.433646 | 63.33099 | 6.49E-06 | 7.27E-05 | 8 |
| 8905_at   | 8905   | ENSG000001AP152    | adaptor-related protei  | I  | 18 | 0.53988  | 0.640019 | 0.681876 | 0.994218 | 1.297384 | 9.610337 | 42.09266 | 2.80E-05 | 0.000212 | 8 |
| 79666_at  | 79666  | ENSG000001PLEKHF2  | pleckstrin homology d   | I  | 22 | 0.432135 | 0.582665 | 0.83958  | 1.242766 | 1.379773 | 5.214511 | 53.49747 | 1.19E-05 | 0.000112 | 8 |
| 2627_at   | 2627   | ENSG000001GATA6    | GATA binding protein    | I  | 11 | 0.93828  | 0.498049 | 1.253688 | 0.9466   | 0.976209 | 7.772491 | 41.42241 | 2.97E-05 | 0.000222 | 8 |
| 10929_at  |        |                    |                         |    |    |          |          |          |          |          |          |          |          |          |   |

|           |        |                     |                                   |    |          |          |          |          |          |          |          |          |          |   |
|-----------|--------|---------------------|-----------------------------------|----|----------|----------|----------|----------|----------|----------|----------|----------|----------|---|
| 4673_at   | 4673   | ENSG000001NAP1L1    | nucleosome assembly I             | 14 | 0.250401 | 0.312352 | 0.98787  | 0.768802 | 1.18575  | 9.237735 | 39.96881 | 3.37E-05 | 0.000244 | 8 |
| 55681_at  | 55681  | ENSG000001SCYL2     | SCYL1-like 2 kinase I             | 25 | 0.307419 | 0.375136 | 0.88439  | 0.980822 | 1.144875 | 6.995242 | 48.05417 | 1.75E-05 | 0.00015  | 8 |
| 140862_at | 140862 | ENSG000001ISM1      | isthmin 1 homolog (zei) NI        | 11 | 0.304685 | 0.414002 | 0.806159 | 0.761327 | 1.328285 | 3.596823 | 21.57284 | 0.000288 | 0.001296 | 8 |
| 2531_at   | 2531   | ENSG000001KDSR      | 3-ketodihy Secreted I             | 32 | 0.395682 | 0.303071 | 0.826292 | 0.778059 | 1.002327 | 7.064127 | 20.70044 | 0.000331 | 0.001454 | 8 |
| 25831_at  | 25831  | ENSG000001HECTD1    | HECT domain containi I            | 10 | 0.415883 | 0.501026 | 1.047241 | 0.802249 | 0.960711 | 8.165829 | 48.85312 | 1.65E-05 | 0.000143 | 8 |
| 6133_at   | 6133   | ENSG000001RPL9      | ribosomal protein L9 I            | 5  | 0.334392 | 0.435709 | 1.068405 | 0.848134 | 1.014706 | 12.08913 | 45.56196 | 2.11E-05 | 0.000171 | 8 |
| 1176_at   | 1176   | ENSG000001AP351     | adaptor-rel transportel I         | 5  | 0.378368 | 0.438982 | 1.109269 | 0.907608 | 1.087937 | 15.76205 | 35.26918 | 5.24E-05 | 0.000342 | 8 |
| 55900_at  | 55900  | ENSG000001ZNF302    | zinc finger protein 302 I         | 16 | 0.302395 | 0.632388 | 0.856307 | 0.902554 | 1.113018 | 7.055509 | 78.24581 | 3.02E-06 | 4.30E-05 | 8 |
| 130502_at | 130502 | ENSG000001TTC32     | tetratricopeptide repe I          | 10 | 0.051692 | 0.515924 | 0.843211 | 0.835333 | 1.176965 | 8.004991 | 23.85509 | 0.000204 | 0.000984 | 8 |
| 901_at    | 901    | ENSG000001CCNG2     | cyclin G2 NI                      | 30 | 0.124534 | 0.364739 | 0.879986 | 0.857221 | 1.109736 | 4.617028 | 49.69126 | 1.55E-05 | 0.000137 | 8 |
| 414149_at | 414149 | ENSG000001ACBD7     | acyl-CoA binding domz NI          | 11 | 0.082063 | 0.506177 | 1.01137  | 1.056619 | 1.175791 | 5.102758 | 13.88936 | 0.001246 | 0.004319 | 8 |
| 10253_at  | 10253  | ENSG000001SPRY2     | sprouty homolog 2 (Dr I           | 11 | 0.221506 | 0.464066 | 1.149889 | 0.962218 | 0.974378 | 9.748525 | 13.28824 | 0.001438 | 0.004867 | 8 |
| 644_at    | 644    | ENSG000001BLVRA     | biliverdin reductase A I          | 10 | 0.279382 | 0.339166 | 1.206916 | 0.894019 | 0.897617 | 8.404819 | 76.44845 | 3.29E-06 | 4.55E-05 | 8 |
| 9306_at   | 9306   | ENSG000001SOC56     | suppressor of cytokine NI         | 16 | 0.214069 | 0.329915 | 1.36265  | 1.071501 | 1.10707  | 5.322998 | 17.71935 | 0.000559 | 0.002232 | 8 |
| 100127888 | 1E+08  | NA                  | LOC100127 hypothetical LOC1001: I | 11 | -0.04439 | 0.300505 | 1.060747 | 1.171167 | 1.47075  | 9.076528 | 15.96761 | 0.000789 | 0.002958 | 8 |
| 8325_at   | 8325   | ENSG000001FZD8      | frizzled short G-protein c I      | 22 | 0.088829 | 0.244493 | 0.884923 | 1.228472 | 1.15529  | 7.612844 | 40.8472  | 3.12E-05 | 0.00023  | 8 |
| 60592_at  | 60592  | ENSG000001SCOC      | short coiled-coil protei I        | 35 | 0.481093 | 0.585745 | 1.41986  | 0.937416 | 1.293655 | 8.347423 | 83.08817 | 2.43E-06 | 3.69E-05 | 8 |
| 6102_at   | 6102   | ENSG000001RP2       | retinitis pig kinase I            | 11 | 0.400729 | 0.370344 | 1.409261 | 0.82628  | 1.330839 | 8.789207 | 38.16119 | 3.96E-05 | 0.000276 | 8 |
| 594839_at | 594839 | NA                  | SNORA33 small nucleolar RNA, H I  | 4  | 0.598987 | 0.465249 | 1.372346 | 0.651486 | 1.443192 | 6.622689 | 10.6111  | 0.002939 | 0.008871 | 8 |
| 9975_at   | 9975   | ENSG000001NR1D2     | nuclear rec nuclear rec I         | 43 | 0.646679 | 0.753896 | 1.33612  | 0.907419 | 1.638252 | 5.51883  | 43.09574 | 2.58E-05 | 0.0002   | 8 |
| 10198_at  | 10198  | ENSG000001MPHOSPH   | M-phase phosphoprot NI            | 11 | 0.420514 | 0.599412 | 1.367347 | 0.824893 | 1.555016 | 6.04871  | 60.1583  | 7.81E-06 | 8.24E-05 | 8 |
| 57393_at  | 57393  | ENSG000001TMEM27    | transmemt peptidase I             | 11 | 0.504682 | 0.23385  | 1.412928 | 1.320066 | 1.610058 | 3.636973 | 15.10878 | 0.000947 | 0.003443 | 8 |
| 394_at    | 394    | ENSG000001ARHGAP5   | Rho GTPasi GTPase I               | 59 | 0.675907 | 0.698853 | 1.906924 | 1.403951 | 1.88549  | 7.318054 | 112.5966 | 8.02E-07 | 1.81E-05 | 8 |
| 10276_at  | 10276  | ENSG000001NET1      | neuroepithelial cell tra I        | 25 | 0.681218 | 0.601169 | 1.58693  | 1.292022 | 1.851119 | 8.043476 | 72.20113 | 4.04E-06 | 5.21E-05 | 8 |
| 6659_at   | 6659   | ENSG000001SOX4      | SRY (sex determining r I          | 77 | 0.702383 | 0.650461 | 1.50591  | 1.732297 | 2.088661 | 6.309963 | 47.53493 | 1.82E-05 | 0.000154 | 8 |
| 55432_at  | 55432  | ENSG000001YOD1      | YOD1 OTU peptidase I              | 7  | 0.531049 | 0.538064 | 1.223032 | 1.147289 | 2.261932 | 6.44271  | 44.5165  | 2.30E-05 | 0.000182 | 8 |
| 84108_at  | 84108  | ENSG000001PCGF6     | polycomb group ring fi NI         | 3  | 0.857426 | 0.348202 | 2.15735  | 1.241395 | 2.223744 | 5.259863 | 13.33055 | 0.001424 | 0.004824 | 8 |
| 222223_at | 222223 | ENSG000001KIAA1324L | KIAA1324-like I                   | 11 | 0.605378 | 1.266465 | 2.04095  | 1.573273 | 1.143637 | 4.330306 | 235.4311 | 5.34E-08 | 3.72E-06 | 8 |
| 6947_at   | 6947   | ENSG000001TCN1      | transcobal Secreted I             | 9  | 0.923892 | 1.025547 | 2.09663  | 1.356376 | 0.865291 | 4.576862 | 52.94981 | 1.24E-05 | 0.000115 | 8 |
| 22882_at  | 22882  | ENSG000001ZHX2      | zinc fingers and homec I          | 11 | 0.709261 | 0.984547 | 1.685303 | 1.453417 | 0.885253 | 5.728928 | 16.63667 | 0.000689 | 0.002649 | 8 |
| 25925_at  | 25925  | ENSG000001ZNF521    | zinc finger protein 521 I         | 9  | 0.325853 | 1.024507 | 1.821371 | 1.385826 | 0.883417 | 4.602708 | 28.4802  | 0.000111 | 0.00061  | 8 |
| 2353_at   | 2353   | ENSG000001FOS       | FBJ murine osteosarco I           | 44 | -0.15602 | 0.810223 | 2.403398 | 1.835104 | 1.297062 | 4.709096 | 39.50516 | 3.51E-05 | 0.000252 | 8 |
| 152002_at | 152002 | ENSG000001C3orf21   | chromoson Secreted NI             | 22 | 1.089527 | 1.166288 | 0.911712 | 0.785768 | 0.72036  | 4.743049 | 58.83036 | 8.46E-06 | 8.74E-05 | 8 |
| 3084_at   | 3084   | ENSG000001NRG1      | neuregulin Secreted NI            | 84 | 1.122053 | 1.174768 | 0.821739 | 0.684345 | 0.708492 | 4.434182 | 82.98951 | 2.44E-06 | 3.69E-05 | 8 |
| 79814_at  | 79814  | ENSG000001AGMAT     | agmatine ureohydrola: NI          | 21 | 1.187557 | 1.076298 | 0.95562  | 0.728271 | 0.712839 | 3.983287 | 75.0457  | 3.51E-06 | 4.75E-05 | 8 |
| 51019_at  | 51019  | ENSG000001CCDC53    | coiled-coil domain con I          | 5  | 1.149891 | 0.986261 | 0.918175 | 0.762439 | 0.65887  | 9.485507 | 68.54527 | 4.88E-06 | 5.93E-05 | 8 |
| 2769_at   | 2769   | ENSG000001GNA15     | guanine nu GTPase I               | 30 | 1.049338 | 1.065759 | 1.00095  | 0.881127 | 0.666828 | 4.251222 | 84.61908 | 2.27E-06 | 3.56E-05 | 8 |
| 23070_at  | 23070  | ENSG000001FTSJ2     | FtsJ methyltransferase I          | 21 | 1.001324 | 1.069433 | 0.968826 | 0.846121 | 0.646359 | 6.147875 | 41.55975 | 2.93E-05 | 0.000219 | 8 |
| 114548_at | 114548 | ENSG000001NLRP3     | NLR family, pyrin dom: NI         | 21 | 1.088793 | 0.949979 | 0.886792 | 0.811815 | 0.525149 | 4.17545  | 37.5303  | 4.21E-05 | 0.000289 | 8 |
| 79875_at  | 79875  | ENSG000001TSD4      | thrombospeptidase NI              | 11 | 1.105327 | 1.222744 | 0.794952 | 0.862767 | 0.838444 | 5.519308 | 102.9351 | 1.11E-06 | 2.22E-05 | 8 |
| 58533_at  | 58533  | ENSG000001SNX6      | sorting nexin 6 NI                | 16 | 1.106577 | 1.069609 | 0.80615  | 0.948142 | 0.859405 | 9.155514 | 99.0454  | 1.28E-06 | 2.40E-05 | 8 |
| 90480_at  | 90480  | ENSG000001GADD45G1  | growth arrr Secreted I            | 11 | 1.052892 | 1.137292 | 0.718794 | 1.020856 | 0.724947 | 10.27159 | 95.35717 | 1.47E-06 | 2.62E-05 | 8 |
| 144406_at | 144406 | ENSG000001WDR66     | WD repeat domain 66 I             | 21 | 1.150657 | 1.062474 | 0.721227 | 0.887859 | 0.683199 | 3.934045 | 51.62625 | 1.35E-05 | 0.000123 | 8 |
| 57630_at  | 57630  | ENSG000001SH3RF1    | SH3 domain containing NI          | 32 | 1.121487 | 0.967329 | 0.716863 | 0.817891 | 0.721771 | 6.400687 | 60.59982 | 7.61E-06 | 8.08E-05 | 8 |
| 11108_at  | 11108  | ENSG000001PRDM4     | PR domain containing I            | 21 | 1.2617   | 0.948858 | 0.819494 | 0.862888 | 0.78774  | 7.791941 | 70.98592 | 4.30E-06 | 5.42E-05 | 8 |
| 129293_at | 129293 | ENSG000001C2orf89   | chromosome 2 open ri NI           | 10 | 1.257126 | 0.858984 | 0.728651 | 0.970888 | 0.452933 | 4.211566 | 73.88621 | 3.72E-06 | 4.93E-05 | 8 |
| 148641_at | 148641 | ENSG000001SLC35F3   | solute carrier family 35 NI       | 11 | 1.312272 | 0.826535 | 0.56611  | 1.006589 | 0.537839 | 3.69858  | 83.88209 | 2.35E-06 | 3.63E-05 | 8 |
| 55778_at  | 55778  | ENSG000001ZNF839    | zinc finger protein 839 NI        | 29 | 1.223211 | 0.57708  | 0.640429 | 0.832813 | 0.418834 | 4.391408 | 60.82681 | 7.50E-06 | 8.01E-05 | 8 |
| 145407_at | 145407 | ENSG000001C14orf37  | chromosome 14 open NI             | 20 | 1.117214 | 0.745527 | 0.70969  | 1.017313 | 0.602331 | 4.154308 | 29.82181 | 9.42E-05 | 0.000539 | 8 |
| 51063_at  | 51063  | ENSG000001CALHM2    | calcium homeostasis n NI          | 11 | 1.114565 | 0.701355 | 0.666638 | 0.848584 | 0.559738 | 4.629613 | 24.39251 | 0.000189 | 0.000925 | 8 |
| 9860_at   | 9860   | ENSG000001LRIG2     | leucine-rich repeats an NI        | 9  | 1.273817 | 0.744483 | 0.790556 | 0.606468 | 0.804328 | 3.925371 | 27.69345 | 0.000122 | 0.000658 | 8 |
| 5563_at   | 5563   | ENSG000001PRKAA2    | protein kin kinase NI             | 44 | 1.154113 | 0.873074 | 0.755585 | 0.789364 | 0.736927 | 64.90243 | 5.94E-06 | 6.85E-05 | 8        |   |
| 23304_at  | 23304  | ENSG000001UBR2      | ubiquitin protein ligase I        | 19 | 1.14483  | 0.679369 | 0.957037 | 0.692104 | 0.656556 | 5.671112 | 75.85889 | 3.38E-06 | 4.64E-05 | 8 |
| 24149_at  | 24149  | ENSG000001ZNF318    | zinc finger protein 318 I         | 22 | 1.096979 | 0.625509 | 0.836711 | 0.528672 | 0.683424 | 6.589187 | 56.08261 | 1.00E-05 | 9.92E-05 | 8 |
| 11227_at  | 11227  | ENSG000001GALNT5    | UDP-N-ace Secreted NI             | 10 | 1.001754 | 0.857988 | 0.69024  | 0.791773 | 0.685961 | 6.221671 | 24.4758  | 0.000187 | 0.000916 | 8 |
| 412_at    | 412    | ENSG000001STS       | steroid sulfatase (micr NI        | 42 | 1.019709 | 0.744703 | 0.670839 | 0.690556 | 0.81057  | 4.200273 | 52.62027 | 1.26E-05 | 0.000117 | 8 |
| 55823_at  | 55823  | NA                  | VP511 vacuolar protein sortin NI  | 11 | 1.025009 | 0.877514 | 1.108597 | 0.673572 | 0.542505 | 6.865168 | 48.9209  | 1.64E-05 | 0.000143 | 8 |
| 64757_at  | 64757  | ENSG000001MOSC1     | MOCO sulp Secreted NI             | 11 | 1.060886 | 0.871816 | 1.010605 | 0.526733 | 0.617404 | 3.852234 | 28.00862 | 0.000117 | 0.000638 | 8 |
| 50855_at  | 50855  | ENSG000001PARD6     | par-6 partitioning defe NI        | 11 | 1.018956 | 0.941963 | 0.955013 | 0.624073 | 0.299191 | 4.670986 | 15.93507 | 0.000795 | 0.002976 | 8 |
| 207063_at | 207063 | ENSG000001DHRSX     | dehydrogenase/reduct NI           | 21 | 1.10038  | 0.885394 | 0.624805 | 0.748747 | 0.568683 | 4.517609 | 65.15571 | 5.86E-06 | 6.79E-05 | 8 |
| 10160_at  | 10160  | ENSG000001FARP1     | FERM, RhoGEF (ARHG) NI            | 43 | 1.06528  | 0.9703   | 0.545208 | 0.68053  | 0.545552 | 4.016717 | 54.25053 | 1.13E-05 | 0.000108 | 8 |
| 54958_at  | 54958  | ENSG000001TMEM160   | transmembrane protei I            | 8  | 1.080166 | 1.114293 | 0.622867 | 0.770226 | 0.507628 | 8.516888 | 79.10499 | 2.90E-06 | 4.17E-05 | 8 |
| 57194_at  | 57194  | ENSG000001ATP10A    | ATPase, cla transportel NI        | 13 | 1.030165 | 0.913418 | 0.701248 | 0.634527 | 0.437687 | 3.946048 | 37.64751 | 4.16E-05 | 0.000286 | 8 |
| 9703_at   | 9703   | ENSG000001KIAA0100  | KIAA0100 I                        | 33 | 0.952386 | 1.009207 | 0.648079 | 0.562182 | 0.509745 | 8.163151 | 48.88185 | 1.64E-05 | 0.000143 | 8 |
| 65095_at  | 65095  | ENSG000001KRI1      | KRI1 homolog (S. cerev I          | 32 | 1.011327 | 0.884179 | 0.493076 | 0.63075  | 0.373214 | 7.846908 | 63.6709  | 6.35E-06 | 7.17E-05 | 8 |
| 10435_at  | 10435  | ENSG000001CDC42EP2  | CDC42 effector protei NI          | 11 | 1.131521 | 1.119109 | 0.546527 | 0.474028 | 0.425309 | 5.609294 | 45.65464 | 2.10E-05 | 0.00017  | 8 |
| 283229_at | 283229 | ENSG000001EFCAB4A   | EF-hand calcium bindir NI         | 11 | 1.016826 | 1.130632 | 0.506528 | 0.397276 | 0.537262 | 3.621823 | 24.50858 | 0.000186 | 0.000913 | 8 |
| 64787_at  | 64787  | ENSG000001EPS8L2    | EPS8-like 2 NI                    | 33 | 1.294012 | 0.904393 |          |          |          |          |          |          |          |   |

|           |        |                    |                             |    |          |          |          |          |          |          |          |          |          |   |
|-----------|--------|--------------------|-----------------------------|----|----------|----------|----------|----------|----------|----------|----------|----------|----------|---|
| 9896_at   | 9896   | ENSG000001FIG4     | FIG4 homolog, SAC1 liq I    | 10 | 1.339713 | 1.125626 | 0.559476 | 0.852038 | 0.162485 | 7.976578 | 47.01404 | 1.89E-05 | 0.000158 | 8 |
| 387893_at | 387893 | ENSG000001SETD8    | SET domain containing I     | 9  | 0.882339 | 1.171771 | 0.641837 | 0.950874 | 0.688793 | 6.339448 | 59.11427 | 8.32E-06 | 8.63E-05 | 8 |
| 493856_at | 493856 | ENSG000001CISD2    | CDGSH iron sulfur don I     | 11 | 0.858824 | 1.109061 | 0.659923 | 0.910309 | 0.629045 | 9.078166 | 65.31648 | 5.80E-06 | 6.74E-05 | 8 |
| 2687_at   | 2687   | ENSG000001GGT5     | gamma-glu Secreted NI       | 19 | 0.802869 | 1.202653 | 0.568861 | 1.010215 | 0.604391 | 4.070337 | 38.84606 | 3.72E-05 | 0.000264 | 8 |
| 4794_at   | 4794   | ENSG000001NFKBIE   | nuclear factor of kappa I   | 11 | 0.916956 | 1.267661 | 0.78271  | 1.043393 | 0.677815 | 6.960431 | 69.36913 | 4.67E-06 | 5.75E-05 | 8 |
| 894_at    | 894    | ENSG000001CCND2    | cyclin D2 NI                | 31 | 0.851768 | 1.251794 | 0.729963 | 0.946649 | 0.554366 | 3.920719 | 41.18328 | 3.03E-05 | 0.000226 | 8 |
| 79683_at  | 79683  | ENSG000001ZDHHHC14 | zinc finger, DHHC-type NI   | 22 | 1.119564 | 1.20725  | 0.81342  | 0.939704 | 0.536372 | 4.728542 | 29.92505 | 9.31E-05 | 0.000534 | 8 |
| 162461_at | 162461 | ENSG000001TMEM92   | transmembrane protei NI     | 18 | 0.99861  | 1.174222 | 0.699091 | 1.065298 | 0.376158 | 4.435424 | 18.89294 | 0.000451 | 0.001874 | 8 |
| 6510_at   | 6510   | ENSG000001SLC1A5   | solute carri Secreted I     | 30 | 0.808396 | 1.450538 | 0.879987 | 0.94167  | 0.490715 | 6.696109 | 76.79065 | 3.23E-06 | 4.50E-05 | 8 |
| 137075_at | 137075 | ENSG000001CLDN23   | claudin 23 NI               | 11 | 0.777586 | 1.359991 | 0.81166  | 0.893545 | 0.530177 | 3.610802 | 18.89672 | 0.00045  | 0.001873 | 8 |
| 126308_at | 126308 | ENSG000001MOBK12A  | MOB1, Mps One Binde I       | 11 | 0.837097 | 1.470054 | 0.669117 | 0.965382 | 0.609905 | 6.319541 | 27.01327 | 0.000133 | 0.000703 | 8 |
| 11174_at  | 11174  | ENSG000001ADAMTS6  | ADAM met peptidase NI       | 20 | 1.237157 | 1.576489 | 0.682013 | 0.879855 | 0.67777  | 4.576065 | 52.72063 | 1.25E-05 | 0.000116 | 8 |
| 2526_at   | 2526   | ENSG000001FUT4     | fucosyltransferase 4 (a NI  | 22 | 1.027972 | 1.537911 | 0.608991 | 0.78854  | 0.641347 | 4.187135 | 42.86131 | 2.63E-05 | 0.000203 | 8 |
| 56977_at  | 56977  | ENSG000001STOX2    | storkhead box 2 NI          | 11 | 1.12041  | 1.460615 | 0.405935 | 0.89029  | 0.412202 | 4.068824 | 42.12607 | 2.79E-05 | 0.000212 | 8 |
| 81490_at  | 81490  | ENSG000001PTDSS2   | phosphatidylserine syr NI   | 22 | 0.90254  | 1.238056 | 0.344588 | 0.879451 | 0.647063 | 5.765476 | 31.99643 | 7.37E-05 | 0.000445 | 8 |
| 84769_at  | 84769  | ENSG000001MPV17L2  | MPV17 mit Secreted I        | 11 | 0.848673 | 1.227108 | 0.389805 | 0.907636 | 0.54083  | 7.343949 | 53.0575  | 1.23E-05 | 0.000115 | 8 |
| 10538_at  | 10538  | ENSG000001BATF     | basic leucine zipper trz NI | 11 | 0.695473 | 1.465398 | 0.431356 | 1.049551 | 0.637834 | 3.970245 | 46.89012 | 1.91E-05 | 0.000159 | 8 |
| 8550_at   | 8550   | ENSG000001MAPKAPK5 | mitogen-ac kinase I         | 9  | 0.859703 | 1.036234 | 0.899396 | 0.891666 | 0.860415 | 7.070714 | 70.09021 | 4.50E-06 | 5.61E-05 | 8 |
| 84934_at  | 84934  | ENSG000001C12orf52 | chromosome 12 open I        | 11 | 0.877892 | 1.018276 | 0.838386 | 0.922208 | 0.796156 | 7.460889 | 75.81256 | 3.39E-06 | 4.65E-05 | 8 |
| 9265_at   | 9265   | ENSG000001CYTH3    | cytohesin 3 I               | 21 | 0.925562 | 1.098692 | 0.906234 | 0.855977 | 0.770773 | 4.359916 | 75.39863 | 3.45E-06 | 4.70E-05 | 8 |
| 1026_at   | 1026   | ENSG000001CDKN1A   | dual-depe kinase I          | 22 | 0.804059 | 1.165643 | 0.935593 | 0.900903 | 0.660055 | 8.478794 | 94.59361 | 1.52E-06 | 2.68E-05 | 8 |
| 8798_at   | 8798   | ENSG000001DYRK4    | cyclin-specif kinase I      | 11 | 0.867273 | 1.136307 | 0.794891 | 0.892313 | 0.718039 | 7.733048 | 60.90282 | 7.47E-06 | 7.99E-05 | 8 |
| 84866_at  | 84866  | ENSG000001TMEM25   | transmemt Secreted NI       | 41 | 0.787426 | 1.108444 | 0.828731 | 0.669251 | 0.840438 | 4.235106 | 32.0082  | 7.36E-05 | 0.000444 | 8 |
| 6397_at   | 6397   | ENSG000001SEC14L1  | SEC14-like transporte I     | 48 | 0.805256 | 1.24157  | 0.706905 | 0.822311 | 0.617196 | 6.962724 | 68.31754 | 4.94E-06 | 5.99E-05 | 8 |
| 5425_at   | 5425   | ENSG000001POLD2    | polymerase (DNA direx I     | 17 | 0.794796 | 1.146131 | 0.664536 | 0.756804 | 0.549929 | 9.12209  | 53.04819 | 1.23E-05 | 0.000115 | 8 |
| 347252_at | 347252 | ENSG000001IGFBPL1  | insulin-like growth fac NI  | 10 | 0.766507 | 1.289024 | 0.766396 | 0.709404 | 0.664837 | 3.929798 | 10.49115 | 0.003045 | 0.009151 | 8 |
| 221545_at | 221545 | NA C6orf136        | chromosome 6 open r I       | 11 | 0.931206 | 1.111807 | 0.76562  | 0.681598 | 0.693958 | 8.406181 | 61.02795 | 7.42E-06 | 7.97E-05 | 8 |
| 152519_at | 152519 | ENSG000001NIPAL1   | NIPA-like domain cont NI    | 11 | 0.97285  | 1.080125 | 0.695792 | 0.72719  | 0.629402 | 3.881799 | 15.12314 | 0.000944 | 0.003434 | 8 |
| 5271_at   | 5271   | ENSG000001SERPINB8 | serpin peptidase inhibi I   | 40 | 0.784105 | 1.136714 | 1.083332 | 0.854078 | 0.480749 | 5.780243 | 45.04213 | 0.22E-05 | 0.000177 | 8 |
| 54985_at  | 54985  | ENSG000001HCFC1R1  | host cell factor C1 regu I  | 31 | 0.76866  | 1.096602 | 0.990524 | 0.841889 | 0.535871 | 8.341149 | 22.98114 | 0.000232 | 0.001091 | 8 |
| 388722_at | 388722 | ENSG000001C1orf53  | chromosome 1 open r NI      | 9  | 0.913371 | 1.19403  | 1.019921 | 0.639277 | 0.5192   | 6.233412 | 46.75431 | 1.93E-05 | 0.00016  | 8 |
| 23479_at  | 23479  | ENSG000001ISCU     | iron-sulfur cluster scaf I  | 21 | 0.803347 | 1.009064 | 0.782122 | 0.91731  | 0.853392 | 10.24332 | 83.6595  | 2.37E-06 | 3.65E-05 | 8 |
| 26524_at  | 26524  | ENSG000001LATS2    | LATS, large kinase I        | 33 | 0.800032 | 1.075787 | 0.74644  | 0.90838  | 0.830706 | 5.793355 | 54.0237  | 1.15E-05 | 0.000109 | 8 |
| 5037_at   | 5037   | ENSG000001PEBP1    | phosphatidylethanolar I     | 7  | 0.827142 | 1.077976 | 0.749599 | 0.98627  | 0.831361 | 9.702214 | 91.82986 | 1.69E-06 | 2.89E-05 | 8 |
| 55751_at  | 55751  | ENSG000001TMEM184  | transmembrane protei I      | 29 | 0.741248 | 1.010992 | 0.799802 | 0.845163 | 0.786126 | 7.190738 | 80.33656 | 2.74E-06 | 4.01E-05 | 8 |
| 131965_at | 131965 | ENSG000001METTL6   | methyltransferase like NI   | 43 | 0.771377 | 1.002172 | 0.708035 | 0.829673 | 0.833448 | 6.04006  | 61.5466  | 7.19E-06 | 7.79E-05 | 8 |
| 57118_at  | 57118  | ENSG000001CAMK1D   | calcium/ca kinase NI        | 33 | 0.824126 | 1.022822 | 0.736303 | 0.850838 | 0.734801 | 4.046288 | 75.19536 | 3.49E-06 | 4.73E-05 | 8 |
| 55086_at  | 55086  | ENSG000001CXorf57  | chromosome X open r NI      | 32 | 0.665169 | 1.085023 | 0.801935 | 1.014141 | 0.684869 | 3.795611 | 77.3467  | 3.15E-06 | 4.41E-05 | 8 |
| 50854_at  | 50854  | NA C6orf48         | chromosom Secreted I        | 21 | 0.669352 | 1.033472 | 0.714874 | 0.928671 | 0.717166 | 11.50443 | 50.68874 | 1.44E-05 | 0.000129 | 8 |
| 6166_at   | 6166   | ENSG000001RPL36AL  | ribosomal protein L36i I    | 8  | 0.749661 | 1.047879 | 0.574082 | 0.855903 | 0.608159 | 7.18289  | 71.8289  | 4.12E-06 | 5.28E-05 | 8 |
| 51678_at  | 51678  | ENSG000001MPP6     | membrane protein, pa NI     | 9  | 0.671852 | 1.030378 | 0.525154 | 0.792887 | 0.659398 | 7.104652 | 37.79285 | 4.10E-05 | 0.000284 | 8 |
| 59269_at  | 59269  | ENSG000001HIVEP3   | human immunodeficie NI      | 44 | 0.648395 | 1.052738 | 0.597814 | 0.709521 | 0.778989 | 6.357693 | 30.79899 | 8.42E-05 | 0.000493 | 8 |
| 4218_at   | 4218   | ENSG000001RAB8A    | RAB8A, member RAS c I       | 11 | 0.76906  | 1.028357 | 0.714852 | 0.843515 | 0.638348 | 9.299495 | 67.57324 | 5.13E-06 | 6.15E-05 | 8 |
| 79036_at  | 79036  | ENSG000001C19orf50 | chromosome 19 open I        | 22 | 0.739219 | 1.083835 | 0.681574 | 0.816241 | 0.573705 | 8.992064 | 74.42375 | 3.62E-06 | 4.85E-05 | 8 |
| 10312_at  | 10312  | ENSG000001TCIRG1   | T-cell, imm transporte I    | 21 | 0.895441 | 1.077326 | 0.621833 | 0.795121 | 0.395926 | 7.230874 | 68.13836 | 4.98E-06 | 6.03E-05 | 8 |
| 51161_at  | 51161  | ENSG000001C3orf18  | chromosome 3 open r NI      | 11 | 0.845796 | 1.019706 | 0.602424 | 0.731732 | 0.433435 | 3.912669 | 15.00404 | 0.000969 | 0.003514 | 8 |
| 6520_at   | 6520   | ENSG000001SLC3A2   | solute carri transporte I   | 73 | 0.886855 | 1.009218 | 0.599907 | 0.837979 | 0.471246 | 7.877641 | 30.92656 | 8.30E-05 | 0.000488 | 8 |
| 1627_at   | 1627   | ENSG000001DBN1     | drebrin 1 I                 | 31 | 0.81208  | 1.045212 | 0.498277 | 0.839282 | 0.517113 | 6.729588 | 50.23576 | 1.49E-05 | 0.000133 | 8 |
| 51293_at  | 51293  | ENSG000001CD320    | CD320 mol Secreted I        | 10 | 0.781661 | 1.129551 | 0.649381 | 0.958379 | 0.444325 | 7.771208 | 35.4715  | 5.13E-05 | 0.000336 | 8 |
| 10211_at  | 10211  | NA FLOT1           | flotillin 1 I               | 54 | 0.806539 | 1.174336 | 0.64658  | 0.789118 | 0.353878 | 8.673456 | 47.19949 | 1.86E-05 | 0.000156 | 8 |
| 6301_at   | 6301   | ENSG000001SARS     | seryl-tRNA synthetase I     | 10 | 0.653615 | 1.172042 | 0.582774 | 0.88384  | 0.282657 | 10.3188  | 47.20942 | 1.86E-05 | 0.000156 | 8 |
| 255488_at | 255488 | ENSG000001RNF144B  | ring finger protein 144 NI  | 33 | 0.592134 | 1.140197 | 0.501622 | 0.818654 | 0.338942 | 4.736552 | 27.85555 | 0.000119 | 0.000647 | 8 |
| 55374_at  | 55374  | ENSG000001TMCO6    | transmembrane and cr NI     | 19 | 0.865141 | 1.040728 | 0.823078 | 0.769233 | 0.298691 | 5.184948 | 33.43992 | 6.31E-05 | 0.000394 | 8 |
| 85450_at  | 85450  | ENSG000001ITPRIP   | inositol 1,4,5-trisphos NI  | 11 | 0.778786 | 1.03911  | 0.878937 | 0.768825 | 0.282229 | 5.497489 | 45.48799 | 2.13E-05 | 0.000172 | 8 |
| 211_at    | 211    | ENSG000001ALAS1    | aminolevulinat, delta I     | 43 | 0.753822 | 1.033969 | 0.752846 | 0.757468 | 0.401515 | 7.768736 | 28.92739 | 0.000105 | 0.000586 | 8 |
| 53635_at  | 53635  | ENSG000001PTOV1    | prostate tumor overex I     | 25 | 0.701854 | 1.091425 | 0.849754 | 0.991478 | 0.413025 | 7.816362 | 51.36717 | 1.38E-05 | 0.000125 | 8 |
| 10809_at  | 10809  | ENSG000001STARD10  | StAR-related lipid tran NI  | 12 | 0.465204 | 0.964142 | 0.820659 | 1.176954 | 0.300408 | 5.346796 | 48.05446 | 1.75E-05 | 0.00015  | 8 |
| 79611_at  | 79611  | ENSG000001ACCS3    | acyl-CoA synthetase sf NI   | 21 | 0.582529 | 0.832097 | 0.829369 | 1.150834 | 0.320817 | 3.981202 | 44.57811 | 2.28E-05 | 0.000181 | 8 |
| 79776_at  | 79776  | ENSG000001ZFHX4    | zinc finger homeobox - NI   | 33 | 0.660025 | 0.998335 | 0.809801 | 0.997648 | 1.068596 | 3.893377 | 38.9295  | 3.69E-05 | 0.000262 | 8 |
| 220930_at | 220930 | NA ZEB1-AS1        | ZEB1 antisense RNA 1 NI     | 21 | 0.664157 | 0.804099 | 0.748439 | 0.937016 | 1.127511 | 3.76773  | 33.29012 | 6.41E-05 | 0.000399 | 8 |
| 10983_at  | 10983  | ENSG000001CCNI     | cyclin I I                  | 42 | 0.510917 | 0.879311 | 0.670915 | 0.875793 | 1.025592 | 10.29364 | 66.60478 | 5.41E-06 | 6.42E-05 | 8 |
| 84992_at  | 84992  | NA PIGY            | phosphatidylinositol gl I   | 16 | 0.784425 | 0.875185 | 0.745136 | 0.780814 | 1.017068 | 9.13354  | 86.41544 | 2.11E-06 | 3.36E-05 | 8 |
| 1062_at   | 1062   | ENSG000001CENPE    | centromere protein E, I     | 11 | 0.675792 | 0.778911 | 0.79309  | 0.820174 | 1.028431 | 8.276433 | 44.9708  | 2.21E-05 | 0.000178 | 8 |
| 9351_at   | 9351   | ENSG000001SLC9A3R2 | solute carrier family 9 I   | 11 | 0.802297 | 0.704962 | 0.592427 | 1.147584 | 0.80215  | 4.194708 | 70.49756 | 4.41E-06 | 5.52E-05 | 8 |
| 7746_at   | 7746   | ENSG000001ZNF193   | zinc finger protein 193 I   | 11 | 0.817386 | 0.712261 | 0.679861 | 1.017113 | 0.696339 | 7.145693 | 82.90224 | 2.45E-06 | 3.70E-05 | 8 |
| 5570_at   | 5570   | ENSG000001PKIB     | protein kin kinase NI       | 55 | 0.592418 | 0.706647 | 0.491866 | 1.00584  | 0.799629 | 3.553592 | 55.44702 | 1.05E-05 | 0.000102 | 8 |
| 3998_at   | 3998   | ENSG000001LMAN1    | lectin, mannose-bindir NI   | 50 | 0.666217 | 0.812056 | 0.610955 | 0.774917 | 1.063745 | 6.989233 | 33.94516 | 5.99E-05 | 0.000379 | 8 |
| 55188_at  | 55188  | ENSG000001RIC8B    | resistance to inhibitors NI | 22 | 0.582264 | 0.729798 | 0.497406 |          |          |          |          |          |          |   |

|           |        |                     |                             |                            |          |          |          |          |          |          |          |           |          |          |   |
|-----------|--------|---------------------|-----------------------------|----------------------------|----------|----------|----------|----------|----------|----------|----------|-----------|----------|----------|---|
| 578_at    | 578    | ENSG000001BAK1      | BCL2-antagonist/killer NI   | 8                          | 1.047315 | 0.493929 | 0.099642 | 0.683072 | 0.064622 | 5.753731 | 13.0169  | 0.001537  | 0.005156 | 8        |   |
| 652995_at | 652995 | NA                  | UCA1                        | urothelial cancer assoc NI | 5        | 1.721722 | 0.412742 | 0.370136 | 0.155522 | 0.603274 | 3.830317 | 50.86994  | 1.43E-05 | 0.000128 | 8 |
| 100288778 | 1E+08  | NA                  | LOC100288778                | W5 protein family ho NI    | 5        | 1.259492 | 0.031583 | 0.620037 | 1.137564 | 0.417301 | 4.076454 | 19.6675   | 0.000394 | 0.001676 | 8 |
| 51069_at  | 51069  | ENSG000001MRPL2     | mitochondr Secreted I       | 18                         | 0.625755 | 1.029738 | 0.985825 | 0.62584  | 0.39064  | 6.122038 | 66.51588 | 5.44E-06  | 6.44E-05 | 8        |   |
| 55558_at  | 55558  | ENSG000001PLXNA3    | plexin A3 Secreted NI       | 11                         | 0.510374 | 1.160654 | 0.976211 | 0.692068 | 0.117322 | 5.114982 | 71.87201 | 4.11E-06  | 5.27E-05 | 8        |   |
| 11007_at  | 11007  | ENSG000001CCDC85B   | coiled-coil domain con I    | 22                         | 0.623247 | 0.952951 | 1.050784 | 0.943015 | 0.228617 | 6.935931 | 58.78558 | 8.48E-06  | 8.75E-05 | 8        |   |
| 6236_at   | 6236   | ENSG000001RRAD      | Ras-related GTPase NI       | 11                         | 0.4627   | 1.196743 | 1.428328 | 0.759125 | 0.311771 | 4.420549 | 31.68114 | 7.63E-05  | 0.000457 | 8        |   |
| 728392_at | 728392 | NA                  | LOC728392                   | hypothetical protein L( NI | 11       | 0.824211 | 1.405955 | 0.911551 | 0.978806 | 0.145722 | 4.993993 | 44.05657  | 2.38E-05 | 0.000187 | 8 |
| 113878_at | 113878 | ENSG000001DTX2      | deltex homolog 2 (Dro NI    | 18                         | 0.922717 | 1.217467 | 1.068736 | 0.520545 | -0.04303 | 4.837049 | 31.50335 | 7.78E-05  | 0.000464 | 8        |   |
| 79703_at  | 79703  | ENSG000001C11orf80  | chromosome 11 open NI       | 9                          | 0.691627 | 0.690212 | 1.729459 | 1.107114 | 0.341581 | 4.630579 | 35.89041 | 4.92E-05  | 0.000325 | 8        |   |
| 139201_at | 139201 | NA                  | LOC139201                   | mitogen-activated pro NI   | 4        | 0.603336 | 0.48982  | 1.70625  | 1.08725  | 0.341874 | 5.223548 | 49.54948  | 1.57E-05 | 0.000138 | 8 |
| 151313_at | 151313 | ENSG000001FAHD2B    | fumarylacetoacetate h NI    | 7                          | 0.790334 | 0.914099 | 1.335231 | 1.390162 | 0.129796 | 3.873476 | 40.35704 | 3.25E-05  | 0.000238 | 8        |   |
| 2043_at   | 2043   | ENSG000001EPHA4     | EPH recept kinase NI        | 42                         | 1.219671 | 0.421868 | 1.188787 | 0.503261 | 0.247243 | 4.790277 | 28.5668  | 0.000109  | 0.000605 | 8        |   |
| 4864_at   | 4864   | ENSG000001NPC1      | Niemann-P transporte I      | 20                         | 1.094772 | 0.702065 | 1.117925 | 0.358162 | 0.218514 | 6.350675 | 27.38314 | 0.000127  | 0.000678 | 8        |   |
| 81619_at  | 81619  | ENSG000001TSPAN14   | tetraspanin 14 I            | 43                         | 1.028081 | 0.655644 | 0.850855 | 0.370803 | 0.402334 | 6.637224 | 38.81762 | 3.73E-05  | 0.000264 | 8        |   |
| 7079_at   | 7079   | ENSG000001TIMP4     | TIMP meta Secreted NI       | 11                         | 1.054915 | 0.487164 | 0.911295 | 0.181996 | 0.359303 | 3.980535 | 19.49228 | 0.000406  | 0.001716 | 8        |   |
| 3855_at   | 3855   | ENSG000001KRT7      | keratin 7 I                 | 10                         | 1.062307 | 0.558351 | 1.145677 | 0.072887 | 0.08545  | 8.886964 | 13.34913 | 0.001417  | 0.004804 | 8        |   |
| 1308_at   | 1308   | ENSG000001COL17A1   | collagen, ty Secreted NI    | 22                         | 1.114736 | 0.634909 | 0.915199 | 0.155169 | 0.037096 | 5.171849 | 17.13715 | 0.000625  | 0.00244  | 8        |   |
| 27290_at  | 27290  | ENSG000001SPINK4    | serine pept Secreted NI     | 8                          | 1.130313 | 0.845893 | 1.508076 | 0.684098 | 0.261572 | 4.212991 | 51.1647  | 1.40E-05  | 0.000126 | 8        |   |
| 677842_at | 677842 | NA                  | SNORA76                     | small nucleolar RNA, H NI  | 3        | 0.67683  | 0.846052 | 1.594793 | 0.416647 | 0.139617 | 4.666349 | 18.75359  | 0.000462 | 0.001913 | 8 |
| 260294_at | 260294 | NA                  | NSUN5P2                     | NOP2/Sun domain farr NI    | 7        | 0.836519 | 0.851532 | 1.572074 | 0.322113 | 0.812938 | 4.29188  | 40.97169  | 3.08E-05 | 0.000228 | 8 |
| 55616_at  | 55616  | ENSG000001ASAP3     | ArfGAP with SH3 dom: NI     | 19                         | 0.469716 | 1.060092 | 0.719004 | 0.715265 | 0.625814 | 4.461014 | 47.39874 | 1.84E-05  | 0.000155 | 8        |   |
| 124491_at | 124491 | ENSG000001TMEM170   | transmembrane protei NI     | 11                         | 0.536396 | 1.114202 | 0.596828 | 0.647309 | 0.495017 | 5.358825 | 15.21913 | 0.000925  | 0.003376 | 8        |   |
| 57161_at  | 57161  | ENSG000001PELI2     | pellino homolog 2 (Drc NI   | 22                         | 0.529496 | 1.076091 | 0.753297 | 0.79411  | 0.390396 | 3.983338 | 31.13351 | 8.11E-05  | 0.000479 | 8        |   |
| 1675_at   | 1675   | ENSG000001CFD       | complemer peptidase NI      | 9                          | 0.350186 | 1.007546 | 0.739406 | 0.564094 | 0.383655 | 3.677455 | 10.24679 | 0.003276  | 0.009752 | 8        |   |
| 26993_at  | 26993  | ENSG000001AKAP8L    | A kinase (PRKA) ancho I     | 17                         | 0.389386 | 1.324037 | 0.6519   | 0.87     | 0.370438 | 6.914347 | 52.72042 | 1.25E-05  | 0.000116 | 8        |   |
| 26284_at  | 26284  | ENSG000001ERALL1    | Era G-protein-like 1 (E. NI | 11                         | 0.384448 | 1.310868 | 0.782073 | 0.612061 | 0.263165 | 5.360421 | 25.38514 | 0.000165  | 0.000829 | 8        |   |
| 4357_at   | 4357   | ENSG000001MPST      | mercaptopyruvate sulf NI    | 11                         | 0.708188 | 1.102817 | 0.61659  | 0.482013 | 0.392334 | 6.865203 | 51.2787  | 1.39E-05  | 0.000125 | 8        |   |
| 112812_at | 112812 | ENSG000001FDX1L     | ferredoxin 1-like I         | 11                         | 0.511393 | 1.064665 | 0.530676 | 0.538305 | 0.297161 | 7.661885 | 33.67847 | 6.16E-05  | 0.000387 | 8        |   |
| 51296_at  | 51296  | ENSG000001SLC15A3   | solute carri transporte NI  | 9                          | 0.589356 | 1.25973  | 0.50661  | 0.36513  | 0.391399 | 4.323738 | 38.9203  | 3.70E-05  | 0.000262 | 8        |   |
| 79192_at  | 79192  | ENSG000001IRX1      | iroquois homeobox 1 NI      | 10                         | 0.430995 | 1.157425 | 0.791646 | 0.365321 | 0.145229 | 3.77373  | 10.95957 | 0.002656  | 0.008155 | 8        |   |
| 89944_at  | 89944  | ENSG000001GLB1L2    | galactosidase, beta 1-II NI | 17                         | 0.961683 | 1.122936 | 0.384933 | 0.628287 | 0.520878 | 5.091989 | 20.46371 | 0.000344  | 0.0015   | 8        |   |
| 10645_at  | 10645  | ENSG000001CAMKK2    | calcium/ca kinase NI        | 40                         | 0.782296 | 1.06381  | 0.53999  | 0.641818 | 0.582738 | 6.301531 | 63.99115 | 6.25E-06  | 7.09E-05 | 8        |   |
| 84292_at  | 84292  | ENSG000001WDR83     | WD repeat domain 83 NI      | 9                          | 0.788017 | 1.247897 | 0.446159 | 0.601883 | 0.744797 | 6.184037 | 28.55709 | 0.00011   | 0.000606 | 8        |   |
| 376267_at | 376267 | ENSG000001RAB15     | RAB15, member RAS o NI      | 11                         | 0.988957 | 1.476181 | 0.720462 | 0.644433 | 0.480404 | 4.917655 | 30.67609 | 8.54E-05  | 0.000498 | 8        |   |
| 3887_at   | 3887   | ENSG000001KRT81     | keratin 81 I                | 11                         | 0.945772 | 1.340621 | 0.778398 | 0.59985  | 0.439749 | 7.198801 | 10.33866 | 0.003187  | 0.009517 | 8        |   |
| 4803_at   | 4803   | ENSG000001NGF       | nerve grow Secreted NI      | 11                         | 0.979289 | 1.025908 | 0.685354 | 0.282022 | 0.36219  | 3.754947 | 11.95587 | 0.002018  | 0.006471 | 8        |   |
| 56548_at  | 56548  | ENSG000001CHST7     | carbohydrate (N-acety I     | 11                         | 0.815326 | 1.071131 | 0.738859 | 0.339744 | 0.158072 | 6.856355 | 13.4222  | 0.001393  | 0.004735 | 8        |   |
| 205_at    | 205    | ENSG000001AK4       | adenylate I kinase I        | 3                          | 0.761423 | 1.096621 | 0.914773 | 0.158967 | 0.418982 | 9.271945 | 20.96329 | 0.000317  | 0.001403 | 8        |   |
| 89849_at  | 89849  | ENSG000001ATG16L2   | ATG16L2 autophagy rela NI   | 17                         | 1.001123 | 1.039484 | 0.541566 | 0.765097 | 0.195941 | 4.544201 | 57.56762 | 9.15E-06  | 9.27E-05 | 8        |   |
| 11120_at  | 11120  | ENSG000001BTN2A1    | butyrophilin Secreted I     | 22                         | 0.794688 | 1.014492 | 0.429734 | 0.773273 | 0.235366 | 6.727908 | 31.7651  | 7.56E-05  | 0.000453 | 8        |   |
| 349565_at | 349565 | ENSG000001NMNAT3    | nicotinamide nucleotic NI   | 11                         | 0.823049 | 1.217726 | 0.467996 | 0.494086 | 0.002978 | 3.855988 | 44.48913 | 2.30E-05  | 0.000182 | 8        |   |
| 4598_at   | 4598   | ENSG000001MVK       | mevalonate kinase NI        | 20                         | 0.798774 | 1.028085 | 0.324316 | 0.534949 | 0.280506 | 4.946494 | 13.55456 | 0.0001349 | 0.004613 | 8        |   |
| 605_at    | 605    | ENSG000001BCL7A     | B-cell CLL/lymphoma 7 NI    | 27                         | 0.708838 | 1.011847 | -0.16145 | 0.626392 | 0.303428 | 3.97487  | 25.57305 | 0.000161  | 0.000813 | 8        |   |
| 29984_at  | 29984  | ENSG000001RHOD      | ras homolo GTPase NI        | 11                         | 0.493915 | 1.470876 | 0.439609 | 0.599565 | -0.10826 | 5.00037  | 44.72379 | 2.26E-05  | 0.00018  | 8        |   |
| 441168_at | 441168 | ENSG000001FAM26F    | family with sequence s NI   | 21                         | 0.407503 | 1.27687  | 0.310682 | 0.393437 | 0.004506 | 4.437394 | 43.23872 | 2.55E-05  | 0.000198 | 8        |   |
| 118738_at | 118738 | ENSG000001ZNF488    | zinc finger protein 488 NI  | 11                         | 0.602135 | 1.614694 | 0.319767 | 0.354487 | 0.4503   | 4.266254 | 25.2258  | 0.000168  | 0.000844 | 8        |   |
| 728215_at | 728215 | ENSG000001FAM155A   | family with sequence s NI   | 33                         | 0.884213 | 1.0284   | 0.627554 | 0.116179 | -0.20092 | 4.599849 | 12.04995 | 0.001968  | 0.006337 | 8        |   |
| 54920_at  | 54920  | ENSG000001DUS2L     | dihydrouridine syntha: NI   | 10                         | 0.606993 | 1.058921 | 0.426135 | 0.388758 | -0.31138 | 6.52833  | 38.07331 | 4.00E-05  | 0.000278 | 8        |   |
| 10848_at  | 10848  | ENSG000001PPP1R13L  | protein phosphatase 1 NI    | 11                         | 0.067888 | 1.184003 | 0.49282  | 0.50753  | 0.380898 | 5.505199 | 24.59041 | 0.000184  | 0.000906 | 8        |   |
| 440_at    | 440    | ENSG000001ASNS      | asparagine synthetase I     | 33                         | -0.17623 | 1.061524 | 0.378084 | 0.701268 | 0.307291 | 9.161038 | 11.48129 | 0.002295  | 0.007199 | 8        |   |
| 9828_at   | 9828   | ENSG000001ARHGEF17  | Rho guanine nucleotic NI    | 11                         | 0.159846 | 1.029667 | 0.273252 | 0.451903 | 0.127478 | 4.893242 | 21.27141 | 0.000302  | 0.001347 | 8        |   |
| 84892_at  | 84892  | ENSG000001C3orf39   | chromosome 3 open n NI      | 11                         | 0.354506 | 1.034363 | 0.411817 | 0.629681 | 0.503114 | 5.07273  | 28.2055  | 0.000114  | 0.000626 | 8        |   |
| 122953_at | 122953 | ENSG000001JDP2      | Jin dimerization prote NI   | 33                         | 0.464946 | 1.175781 | 0.156217 | 0.675039 | 0.297771 | 3.864392 | 47.70798 | 1.79E-05  | 0.000152 | 8        |   |
| 51545_at  | 51545  | ENSG000001ZNF581    | zinc finger protein 581 NI  | 11                         | 0.166615 | 1.188246 | 0.663064 | 0.636405 | 0.67098  | 7.075995 | 28.61703 | 0.000109  | 0.000603 | 8        |   |
| 7005_at   | 7005   | ENSG000001TEAD3     | TEA domain family me NI     | 11                         | 0.253548 | 1.068169 | 0.720676 | 0.49986  | 0.642348 | 5.289302 | 34.72096 | 5.53E-05  | 0.000356 | 8        |   |
| 133418_at | 133418 | ENSG000001EMB       | embigin NI                  | 5                          | 0.095465 | 1.064392 | 0.500249 | 0.203711 | 0.867118 | 3.426586 | 24.99859 | 0.000174  | 0.000866 | 8        |   |
| 1060_at   | 1060   | ENSG000001CENPC1    | centromere protein C : NI   | 15                         | 0.190029 | 0.611789 | 1.010939 | 0.430864 | 0.351695 | 4.126372 | 12.29666 | 0.001845  | 0.006014 | 8        |   |
| 3872_at   | 3872   | ENSG000001KRT17     | keratin 17 NI               | 7                          | -0.10608 | 1.528137 | 0.105121 | 0.454047 | 0.25248  | 3.808753 | 16.00305 | 0.000784  | 0.00294  | 8        |   |
| 4693_at   | 4693   | ENSG000001NDP       | Norrie dise Secreted I      | 11                         | 0.260438 | 0.789446 | 1.208192 | 0.113513 | -0.08666 | 6.381264 | 14.66362 | 0.001045  | 0.003735 | 8        |   |
| 26872_at  | 26872  | ENSG000001STEAP1    | six transme transporte I    | 10                         | 1.471949 | 1.238029 | 1.190312 | 1.117941 | 1.227107 | 8.163468 | 100.9624 | 1.19E-06  | 2.30E-05 | 8        |   |
| 10486_at  | 10486  | ENSG000001CAP2      | CAP, adenylate cyclase I    | 60                         | 1.380679 | 1.170026 | 1.299095 | 1.113336 | 1.14839  | 7.872251 | 81.66363 | 2.59E-06  | 3.85E-05 | 8        |   |
| 51099_at  | 51099  | ENSG000001ABHD5     | abhydrolas peptidase I      | 66                         | 1.323998 | 1.206739 | 1.174869 | 1.085489 | 1.294664 | 5.618461 | 110.3672 | 8.63E-07  | 1.90E-05 | 8        |   |
| 93973_at  | 93973  | ENSG000001ACTR8     | ARP8 actin-related pro I    | 20                         | 1.310049 | 1.251862 | 1.146296 | 1.187044 | 1.176971 | 5.975576 | 107.2294 | 9.59E-07  | 2.03E-05 | 8        |   |
| 51232_at  | 51232  | ENSG000001CRIM1     | cysteine ric kinase I       | 30                         | 1.304508 | 1.492506 | 1.282351 | 1.232797 | 1.310076 | 5.43321  | 83.29126 | 2.41E-06  | 3.67E-05 | 8        |   |
| 91574_at  | 91574  | ENSG000001C12orf65  | chromosome 12 open I        | 22                         | 1.108817 | 1.431161 | 1.128708 | 1.183968 | 1.341303 | 6.772852 | 89.87545 | 1.83E-06  | 3.04E-05 | 8        |   |
| 81849_at  | 81849  | ENSG000001ST6GALNA1 | ST6 (alpha- Secreted I      | 43                         | 1.535767 | 1.477115 | 1.084402 | 1.414145 | 1.324861 | 4.190687 | 149.395  | 2.85E-07  | 9.19E-06 | 8        |   |
| 51499_at  | 51499  | ENSG000001TRIAP1    | TP53 regulated inhibit I    | 10                         | 1.266478 |          |          |          |          |          |          |           |          |          |   |

|           |        |                    |                            |     |          |          |          |          |          |          |          |          |          |   |
|-----------|--------|--------------------|----------------------------|-----|----------|----------|----------|----------|----------|----------|----------|----------|----------|---|
| 137994_at | 137994 | ENSG000001LETM2    | leucine zipper-EF-hanc I   | 16  | 1.339824 | 1.853129 | 1.446408 | 1.438218 | 1.484193 | 4.828126 | 83.87956 | 2.35E-06 | 3.63E-05 | 8 |
| 23657_at  | 23657  | ENSG000001SLC7A11  | solute carri transportel I | 33  | 1.26741  | 1.790526 | 1.420312 | 1.516003 | 1.358898 | 7.333676 | 31.38376 | 7.89E-05 | 0.000469 | 8 |
| 122509_at | 122509 | ENSG000001IFI2L1   | interferon, alpha-induc I  | 11  | 1.129246 | 1.712741 | 1.295109 | 1.486065 | 1.48232  | 7.306162 | 80.61734 | 2.71E-06 | 3.99E-05 | 8 |
| 2535_at   | 2535   | ENSG000001FZD2     | frizzled fan G-protein c I | 11  | 1.161143 | 1.722375 | 1.317075 | 1.487347 | 1.402971 | 8.613382 | 170.4732 | 1.75E-07 | 7.02E-06 | 8 |
| 119016_at | 119016 | ENSG000001AGAP4    | ArfGAP with GTPase d I     | 4   | 1.3761   | 1.801485 | 1.363375 | 1.293804 | 1.60554  | 6.910607 | 173.7343 | 1.64E-07 | 6.81E-06 | 8 |
| 119710_at | 119710 | ENSG000001C11orf74 | chromosome 11 open I       | 30  | 1.433683 | 1.720849 | 1.438466 | 1.402289 | 1.297404 | 6.461989 | 98.78952 | 1.29E-06 | 2.41E-05 | 8 |
| 9921_at   | 9921   | ENSG000001RNF10    | ring finger protein 10 I   | 28  | 1.397485 | 1.739179 | 1.432339 | 1.359182 | 1.233002 | 8.716979 | 180.5143 | 1.42E-07 | 6.21E-06 | 8 |
| 3219_at   | 3219   | ENSG000001HOXB9    | homeobox B9 I              | 11  | 1.216591 | 1.822582 | 1.49     | 1.379357 | 1.315468 | 7.239463 | 94.14043 | 1.54E-06 | 2.71E-05 | 8 |
| 50515_at  | 50515  | ENSG000001CHST11   | carbohydrate (chondr I     | 29  | 1.284497 | 1.677164 | 1.516493 | 1.421246 | 1.310883 | 8.34928  | 218.3914 | 7.05E-08 | 4.30E-06 | 8 |
| 10365_at  | 10365  | ENSG000001KLF2     | Kruppel-like factor 2 (I   | 21  | 1.015312 | 1.711929 | 1.156975 | 1.28536  | 1.642798 | 6.90162  | 164.9068 | 1.98E-07 | 7.48E-06 | 8 |
| 23554_at  | 23554  | ENSG000001TSPAN12  | tetraspanin 12 I           | 20  | 1.063341 | 1.48024  | 1.195336 | 1.336885 | 1.718057 | 4.801814 | 53.56559 | 1.18E-05 | 0.000112 | 8 |
| 116238_at | 116238 | ENSG000001TLCD1    | TLC domain containing NI   | 9   | 1.026315 | 1.842798 | 0.958193 | 1.238129 | 1.477832 | 5.402859 | 91.14965 | 1.73E-06 | 2.94E-05 | 8 |
| 2273_at   | 2273   | ENSG000001FHL1     | four and a half LIM dor I  | 107 | 1.552607 | 1.771113 | 1.343043 | 1.57824  | 0.981004 | 4.51273  | 213.1666 | 7.71E-08 | 4.53E-06 | 8 |
| 55653_at  | 55653  | ENSG000001BCAS4    | breast carcinoma ampl I    | 33  | 1.615856 | 1.780982 | 1.113334 | 1.476334 | 1.019774 | 5.843625 | 33.9406  | 6.00E-05 | 0.000379 | 8 |
| 3265_at   | 3265   | ENSG000001HRAS     | v-Ha-ras Harvey rat sar I  | 22  | 1.38165  | 1.723418 | 1.059684 | 1.461952 | 0.827104 | 8.162227 | 136.9418 | 3.92E-07 | 1.12E-05 | 8 |
| 4128_at   | 4128   | ENSG000001MAOA     | monoamine oxidase A I      | 44  | 1.536674 | 1.757959 | 1.217116 | 1.227439 | 1.111283 | 5.965449 | 186.1073 | 1.27E-07 | 5.87E-06 | 8 |
| 117854_at | 117854 | ENSG000001TRIM6    | tripartite motif contain I | 2   | 1.466886 | 1.75542  | 1.132577 | 1.277505 | 1.066421 | 5.483167 | 95.57474 | 1.46E-06 | 2.61E-05 | 8 |
| 55030_at  | 55030  | ENSG000001FBXO34   | F-box protein 34 I         | 22  | 1.297218 | 1.822826 | 1.342123 | 1.246484 | 1.145094 | 6.950718 | 182.324  | 1.37E-07 | 6.17E-06 | 8 |
| 3382_at   | 3382   | ENSG000001ICA1     | islet cell autoantigen 1 I | 43  | 1.214312 | 1.499919 | 1.237424 | 1.599499 | 0.954303 | 4.462143 | 196.7017 | 1.04E-07 | 5.27E-06 | 8 |
| 255738_at | 255738 | ENSG000001PCSK9    | proprotein peptidase I     | 19  | 1.009429 | 1.477431 | 1.228163 | 1.576628 | 0.960961 | 5.38741  | 139.9672 | 3.62E-07 | 1.06E-05 | 8 |
| 80212_at  | 80212  | ENSG000001CCDC92   | coiled-coil domain con I   | 11  | 1.18788  | 1.553702 | 1.000255 | 1.697221 | 1.19594  | 6.811151 | 149.5948 | 2.83E-07 | 9.18E-06 | 8 |
| 11153_at  | 11153  | ENSG000001FICD     | FIC domain Secreted I      | 11  | 1.049641 | 1.973589 | 1.146754 | 1.524794 | 1.27228  | 6.311941 | 52.48682 | 1.27E-05 | 0.000118 | 8 |
| 55201_at  | 55201  | ENSG000001MAP15    | microtubule-associate I    | 10  | 1.153662 | 1.94773  | 1.248795 | 1.488138 | 0.929082 | 6.971326 | 102.3077 | 1.14E-06 | 2.24E-05 | 8 |
| 1112_at   | 1112   | ENSG000001FOXN3    | forkhead b Secreted I      | 18  | 1.627877 | 1.525477 | 1.166843 | 1.56533  | 1.832533 | 6.329269 | 122.4564 | 5.90E-07 | 1.48E-05 | 8 |
| 91392_at  | 91392  | ENSG000001ZNF502   | zinc finger protein 502 I  | 22  | 1.610283 | 1.445691 | 1.27853  | 1.656291 | 1.726188 | 4.340403 | 169.7368 | 1.78E-07 | 7.03E-06 | 8 |
| 7049_at   | 7049   | ENSG000001TGFB3    | transformin Secreted I     | 32  | 2.066871 | 1.348491 | 1.075129 | 1.516913 | 1.816365 | 5.607    | 194.2719 | 1.08E-07 | 5.36E-06 | 8 |
| 50617_at  | 50617  | ENSG000001ATP6VOA4 | ATPase, H+ transportel I   | 18  | 1.796739 | 1.382344 | 0.963679 | 1.41407  | 1.301559 | 4.384593 | 81.43038 | 2.61E-06 | 3.88E-05 | 8 |
| 956_at    | 956    | ENSG000001ENTPD3   | ectonucleoside triphos I   | 19  | 1.830222 | 1.173905 | 0.750869 | 1.336598 | 1.128248 | 4.453059 | 42.21108 | 2.77E-05 | 0.000211 | 8 |
| 375033_at | 375033 | ENSG000001PEAR1    | platelet endothelial ag I  | 11  | 1.592946 | 1.671362 | 0.766174 | 1.511234 | 1.119355 | 4.308543 | 77.55825 | 3.12E-06 | 4.39E-05 | 8 |
| 10103_at  | 10103  | ENSG000001TSPAN1   | tetraspanin 1 I            | 6   | 1.910515 | 1.905419 | 1.773081 | 1.162431 | 1.159002 | 7.32447  | 133.2295 | 4.33E-07 | 1.20E-05 | 8 |
| 2825_at   | 2825   | ENSG000001GPR1     | G protein-c G-protein c I  | 11  | 1.684899 | 1.67684  | 1.619142 | 1.154393 | 1.077568 | 6.018129 | 69.80948 | 4.56E-06 | 5.66E-05 | 8 |
| 10687_at  | 10687  | ENSG000001PNMA2    | paraneoplastic antigen I   | 43  | 1.886814 | 1.502311 | 1.714067 | 1.302232 | 1.346905 | 4.27189  | 164.9156 | 1.98E-07 | 7.48E-06 | 8 |
| 5999_at   | 5999   | ENSG000001RGS4     | regulator of G-protein I   | 43  | 2.133563 | 1.828416 | 2.031435 | 1.196644 | 1.382181 | 5.024267 | 271.1859 | 3.17E-08 | 2.63E-06 | 8 |
| 2124_at   | 2124   | ENSG000001EVI2B    | ecotropic viral integrat I | 11  | 2.153125 | 1.511757 | 1.496575 | 1.265781 | 0.709823 | 6.107835 | 59.48834 | 8.13E-06 | 8.48E-05 | 8 |
| 56169_at  | 56169  | ENSG000001GSDMC    | gasdermin C I              | 10  | 1.870265 | 1.614834 | 1.470548 | 1.183202 | 0.725243 | 4.192111 | 94.34203 | 1.53E-06 | 2.70E-05 | 8 |
| 347735_at | 347735 | ENSG000001SERINC2  | serine incorporator 2 I    | 20  | 2.190633 | 2.050567 | 1.257114 | 0.906339 | 0.621684 | 4.786556 | 110.2544 | 8.66E-07 | 1.90E-05 | 8 |
| 2131_at   | 2131   | ENSG000001EXT1     | exostosin 1 I              | 10  | 1.543209 | 1.47486  | 1.154857 | 1.06255  | 0.75489  | 9.805739 | 179.6931 | 1.45E-07 | 6.27E-06 | 8 |
| 115098_at | 115098 | ENSG000001CCDC124  | coiled-coil domain con I   | 10  | 1.354143 | 1.420942 | 1.071727 | 1.138234 | 0.614676 | 7.084896 | 45.34934 | 2.15E-05 | 0.000174 | 8 |
| 126374_at | 126374 | ENSG000001WTIP     | Wilms tumor 1 interac NI   | 11  | 1.468754 | 1.508315 | 0.984346 | 0.870427 | 0.603287 | 5.362265 | 65.51318 | 5.74E-06 | 6.69E-05 | 8 |
| 9535_at   | 9535   | ENSG000001GMFG     | glia maturation factor, NI | 9   | 1.57318  | 1.628888 | 1.423851 | 1.150054 | 0.481612 | 4.501175 | 114.5283 | 7.54E-07 | 1.73E-05 | 8 |
| 55357_at  | 55357  | ENSG000001TBC1D2   | TBC1 domain family, n I    | 11  | 1.451114 | 1.611751 | 1.537197 | 1.032729 | 0.610617 | 9.007911 | 61.7122  | 7.12E-06 | 7.75E-05 | 8 |
| 3170_at   | 3170   | ENSG000001FOXA2    | forkhead box A2 NI         | 11  | 0.984046 | 1.912022 | 0.960537 | 1.13959  | 0.65986  | 4.23334  | 122.9845 | 5.81E-07 | 1.47E-05 | 8 |
| 8291_at   | 8291   | ENSG000001DYSF     | dysferlin, limb girdle n I | 27  | 1.159368 | 1.756405 | 0.822769 | 1.314798 | 0.599488 | 5.194046 | 24.73787 | 0.00018  | 0.000891 | 8 |
| 83547_at  | 83547  | ENSG000001RILP     | Rab interacting lysosor I  | 10  | 1.386102 | 2.192864 | 1.008921 | 1.26074  | 0.540758 | 5.798298 | 145.0375 | 3.18E-07 | 9.86E-06 | 8 |
| 3885_at   | 3885   | ENSG000001KRT34    | keratin 34 Secreted I      | 11  | 1.115679 | 1.901303 | 0.968002 | 0.279503 | 0.35093  | 4.693146 | 92.27504 | 1.66E-06 | 2.85E-05 | 8 |
| 115265_at | 115265 | ENSG000001DDIT4L   | DNA-damage-inducibl I      | 11  | 2.020758 | 1.640683 | 0.479735 | 1.386489 | 0.515454 | 4.525439 | 87.88022 | 1.98E-06 | 3.21E-05 | 8 |
| 57574_at  | 57574  | ENSG0000014-Mar    | membrane-associated I      | 11  | 1.981645 | 1.801042 | 0.63597  | 0.648131 | 0.227888 | 5.810942 | 32.75695 | 6.79E-05 | 0.000416 | 8 |
| 10632_at  | 10632  | ENSG000001ATP5L    | ATP synthase transportel I | 26  | 0.73038  | 1.740664 | 1.071459 | 0.86545  | 0.975815 | 9.226964 | 72.62473 | 3.96E-06 | 5.14E-05 | 7 |
| 54521_at  | 54521  | ENSG000001WDR44    | WD repeat domain 44 I      | 53  | 0.763324 | 0.726474 | 1.028691 | 0.837372 | 0.920789 | 6.421242 | 52.34392 | 1.29E-05 | 0.000119 | 7 |
| 5868_at   | 5868   | ENSG000001RAB5A    | RAB5A, me GTPase I         | 30  | 0.75223  | 0.643474 | 1.137662 | 0.822433 | 0.851692 | 8.275334 | 77.97562 | 3.06E-06 | 4.33E-05 | 7 |
| 10175_at  | 10175  | ENSG000001CNIH     | cornichon homolog (D I     | 11  | 0.617348 | 0.625504 | 1.036266 | 0.998408 | 0.867271 | 10.34976 | 66.77491 | 5.36E-06 | 6.36E-05 | 7 |
| 65998_at  | 65998  | NA C11orf95        | chromosome 11 open I       | 10  | 0.668408 | 0.532404 | 0.989397 | 1.000908 | 0.892964 | 6.555081 | 27.41723 | 0.000126 | 0.000677 | 7 |
| 5128_at   | 5128   | ENSG000001CDK17    | cyclin-depe kinase I       | 20  | 0.537171 | 0.61285  | 1.20135  | 0.895124 | 0.806029 | 4.505372 | 50.05313 | 1.51E-05 | 0.000134 | 7 |
| 169834_at | 169834 | NA ZNF883          | zinc finger protein 883 NI | 15  | 0.540612 | 0.71753  | 1.025186 | 0.911628 | 0.803067 | 3.677092 | 33.60095 | 6.21E-05 | 0.000389 | 7 |
| 56898_at  | 56898  | ENSG000001BDH2     | 3-hydroxybutyrate def NI   | 13  | 0.474912 | 0.61154  | 1.063228 | 0.772497 | 0.702072 | 6.006234 | 47.8429  | 1.78E-05 | 0.000151 | 7 |
| 9262_at   | 9262   | ENSG000001STK17B   | serine/thre kinase NI      | 33  | 0.803625 | 0.664912 | 1.02921  | 0.738571 | 0.690075 | 5.116235 | 31.49944 | 7.78E-05 | 0.000464 | 7 |
| 23092_at  | 23092  | ENSG000001ARHGAP26 | Rho GTPase activating NI   | 65  | 0.908948 | 0.698176 | 1.024301 | 0.60108  | 0.664612 | 4.603697 | 31.50304 | 7.78E-05 | 0.000464 | 7 |
| 2230_at   | 2230   | ENSG000001FDX1     | ferredoxin 1 NI            | 20  | 0.945368 | 0.503674 | 1.004879 | 0.64595  | 0.79672  | 5.561122 | 59.64977 | 8.05E-06 | 8.42E-05 | 7 |
| 8536_at   | 8536   | ENSG000001CAMK1    | calcium/ca kinase NI       | 10  | 0.799441 | 0.820815 | 1.137337 | 0.565143 | 0.75786  | 4.770524 | 41.81508 | 2.87E-05 | 0.000216 | 7 |
| 51201_at  | 51201  | ENSG000001ZDHC2    | zinc finger, DHHC-type I   | 32  | 0.622248 | 0.724392 | 1.141605 | 0.582324 | 0.638084 | 6.98904  | 45.93534 | 2.05E-05 | 0.000167 | 7 |
| 7321_at   | 7321   | ENSG000001UBE2D1   | ubiquitin-conjugating t I  | 22  | 0.505556 | 0.49003  | 1.140598 | 0.71506  | 0.854368 | 8.195096 | 47.16751 | 1.87E-05 | 0.000156 | 7 |
| 255520_at | 255520 | ENSG000001ELMOD2   | ELMO/CED-12 domain NI      | 19  | 0.490814 | 0.420383 | 1.130034 | 0.601655 | 0.953597 | 6.986278 | 43.81702 | 2.43E-05 | 0.00019  | 7 |
| 7320_at   | 7320   | ENSG000001UBE2B    | ubiquitin-conjugating t I  | 30  | 0.638231 | 0.550395 | 1.006365 | 0.702485 | 0.8266   | 8.066513 | 23.15603 | 0.000226 | 0.00107  | 7 |
| 57692_at  | 57692  | ENSG000001MAGEE1   | melanoma antigen fan NI    | 11  | 0.47771  | 0.58467  | 1.01059  | 0.517281 | 1.040912 | 5.434042 | 13.69419 | 0.001305 | 0.004493 | 7 |
| 23401_at  | 23401  | ENSG000001FRAT2    | frequently rearranged NI   | 11  | 0.364378 | 0.564624 | 1.067908 | 0.610926 | 0.908961 | 4.985116 | 35.5235  | 5.10E-05 | 0.000335 | 7 |
| 221037_at | 221037 | ENSG000001JMD1C    | jumonji domain contai I    | 43  | 0.743302 | 0.520134 | 0.91079  | 0.548901 | 1.005309 | 8.009173 | 56.00268 | 1.01E-05 | 9.96E-05 | 7 |
| 1385_at   | 1385   | ENSG000001CREB1    | cAMP responsive elem NI    | 76  | 0.710661 | 0.380694 | 1.000253 | 0.506125 | 0.967076 | 5.240473 | 49.11433 | 1.62E-05 | 0.000141 | 7 |
| 114932_at | 114932 | ENSG000001MRFAP11  | Morf4 family associate I   | 11  | 0.609047 | 0.528631 | 1.211247 | 0.858103 |          |          |          |          |          |   |

|           |        |                     |                         |          |    |          |          |          |          |          |          |          |          |          |          |   |
|-----------|--------|---------------------|-------------------------|----------|----|----------|----------|----------|----------|----------|----------|----------|----------|----------|----------|---|
| 254170_at | 254170 | ENSG000001FBXO33    | F-box protein 33        | NI       | 22 | 0.541595 | 0.501642 | 1.280388 | 0.635589 | 0.502996 | 7.123388 | 14.7359  | 0.001028 | 0.003691 | 7        |   |
| 51533_at  | 51533  | ENSG000001PHF7      | PHD finger protein 7    | NI       | 11 | 0.754709 | 0.51071  | 1.228955 | 0.612751 | 0.606597 | 4.036122 | 40.34173 | 3.26E-05 | 0.000238 | 7        |   |
| 58526_at  | 58526  | ENSG000001MID1P1    | MID1 interacting prote  | I        | 11 | 0.694967 | 0.710492 | 1.0256   | 0.75427  | 0.435425 | 8.469494 | 42.3653  | 2.74E-05 | 0.000209 | 7        |   |
| 64129_at  | 64129  | ENSG000001TINAGL1   | tubulointer peptidase   | I        | 20 | 0.659521 | 0.610017 | 1.09852  | 0.602469 | 0.337913 | 4.244264 | 30.07112 | 9.15E-05 | 0.000526 | 7        |   |
| 27345_at  | 27345  | ENSG000001KCNMB4    | potassium ion channe    | NI       | 11 | 0.879858 | 0.462814 | 1.044784 | 0.59344  | 0.584543 | 3.858102 | 17.24275 | 0.000612 | 0.002402 | 7        |   |
| 79772_at  | 79772  | ENSG000001MCTP1     | multiple C2 domains, t  | NI       | 29 | 0.871729 | 0.359113 | 1.065457 | 0.546073 | 0.500023 | 5.392358 | 11.65105 | 0.00219  | 0.006925 | 7        |   |
| 4815_at   | 4815   | ENSG000001NINJ2     | ninjurin 2              | NI       | 11 | 0.855525 | 0.240636 | 1.187952 | 0.604301 | 0.385262 | 3.994607 | 28.7156  | 0.000107 | 0.000597 | 7        |   |
| 11169_at  | 11169  | ENSG000001WDHD1     | WD repeat and HMG-t     | NI       | 21 | 0.680487 | -0.02176 | 1.071681 | 0.702071 | 1.190818 | 4.520032 | 63.16003 | 6.55E-06 | 7.32E-05 | 7        |   |
| 339005_at | 339005 | NA WHAMMP:          | WAS protein homolog     | NI       | 5  | 0.875622 | -0.11276 | 1.160215 | 0.441154 | 0.968269 | 3.960711 | 27.60659 | 0.000123 | 0.000664 | 7        |   |
| 1794_at   | 1794   | ENSG000001DOCK2     | dedicator of cytokinesi | I        | 11 | 1.005301 | 0.122859 | 0.838075 | 0.573972 | 0.762225 | 4.164154 | 54.45203 | 1.12E-05 | 0.000107 | 7        |   |
| 57721_at  | 57721  | ENSG000001METTL14   | methyltransferase like  | I        | 11 | 0.942855 | 0.628285 | 0.827537 | 0.653904 | 1.130391 | 6.774197 | 23.39102 | 0.000218 | 0.001039 | 7        |   |
| 4820_at   | 4820   | ENSG000001NKTR      | natural killer-tumor re | I        | 31 | 0.823095 | 0.552221 | 0.850269 | 0.684234 | 1.07444  | 7.354308 | 57.39359 | 9.25E-06 | 9.32E-05 | 7        |   |
| 23362_at  | 23362  | ENSG000001PSD3      | pleckstrin and Sec7 do  | NI       | 54 | 0.862791 | 0.724553 | 0.758696 | 0.683224 | 1.268699 | 5.403331 | 48.91938 | 1.64E-05 | 0.000143 | 7        |   |
| 11056_at  | 11056  | ENSG000001DDX52     | DEAD (Asp-Glu-Ala-As    | NI       | 33 | 1.05048  | 0.696634 | 0.935201 | 0.659124 | 1.029435 | 4.955998 | 80.38012 | 2.74E-06 | 4.01E-05 | 7        |   |
| 57696_at  | 57696  | ENSG000001DDX55     | DEAD (Asp-Glu-Ala-As    | NI       | 37 | 1.030209 | 0.792066 | 0.691656 | 0.757809 | 1.021405 | 6.822335 | 60.96715 | 7.44E-06 | 7.99E-05 | 7        |   |
| 3070_at   | 3070   | ENSG000001HELLS     | helicase, lymphoid-spe  | I        | 31 | 1.02309  | 0.399038 | 0.872029 | 0.535053 | 0.953979 | 5.823176 | 18.5567  | 0.000479 | 0.001969 | 7        |   |
| 338657_at | 338657 | ENSG000001CCDC84    | coiled-coil domain con  | I        | 8  | 0.991553 | 0.421746 | 0.63256  | 0.695463 | 1.002908 | 7.595359 | 48.03752 | 1.75E-05 | 0.00015  | 7        |   |
| 57551_at  | 57551  | ENSG000001TAOK1     | TAO kinase kinase       | NI       | 22 | 1.050454 | 0.63353  | 0.640943 | 0.409822 | 0.98287  | 4.868156 | 27.51797 | 0.000125 | 0.00067  | 7        |   |
| 9126_at   | 9126   | ENSG000001SMC3      | structural maintenanc   | I        | 18 | 0.953402 | 0.400235 | 0.824244 | 0.280424 | 1.264624 | 8.433193 | 50.36786 | 1.48E-05 | 0.000131 | 7        |   |
| 10778_at  | 10778  | NA ZNF271           | zinc finger protein 271 | NI       | 32 | 0.787135 | 0.402992 | 0.663563 | 0.50582  | 1.036806 | 5.779952 | 56.85615 | 9.57E-06 | 9.59E-05 | 7        |   |
| 5529_at   | 5529   | ENSG000001PPP2R5E   | protein phosphatase 2   | I        | 21 | 0.792114 | 0.390132 | 0.705437 | 0.34227  | 1.13337  | 7.968433 | 17.09186 | 0.00063  | 0.002458 | 7        |   |
| 84296_at  | 84296  | ENSG000001GINS4     | GINS complex subunit    | I        | 24 | 0.686311 | 0.226771 | 0.647445 | 0.432627 | 1.124973 | 7.570422 | 51.7401  | 1.34E-05 | 0.000122 | 7        |   |
| 9497_at   | 9497   | ENSG000001SLC4A7    | solute carri transport  | I        | 20 | 0.607723 | 0.281921 | 0.676131 | 0.400794 | 1.124983 | 7.924021 | 28.08989 | 0.000116 | 0.000634 | 7        |   |
| 57563_at  | 57563  | ENSG000001KLHL8     | kelch-like 8 (Drosophil | NI       | 33 | 0.703488 | 0.4979   | 0.678134 | 0.58197  | 1.267422 | 5.888826 | 42.65107 | 2.67E-05 | 0.000206 | 7        |   |
| 1829_at   | 1829   | ENSG000001DSG2      | desmoglein 2            | I        | 33 | 0.561359 | 0.358472 | 0.426174 | 0.54761  | 1.058516 | 7.099657 | 22.24775 | 0.000259 | 0.001191 | 7        |   |
| 92259_at  | 92259  | NA MRPS36           | mitochondrial ribosom   | I        | 21 | 0.402985 | 0.479339 | 0.788404 | 0.655537 | 1.104437 | 5.725559 | 21.56924 | 0.000288 | 0.001297 | 7        |   |
| 10949_at  | 10949  | ENSG000001HNRNPA0   | heterogeneous nuclea    | I        | 21 | 0.368212 | 0.523999 | 0.850246 | 0.567201 | 1.019058 | 9.171184 | 47.70703 | 1.79E-05 | 0.000152 | 7        |   |
| 55789_at  | 55789  | ENSG000001DEPDC1B   | DEP domain containin    | I        | 33 | 0.373765 | 0.435877 | 0.678608 | 0.523792 | 1.111038 | 7.193402 | 27.29451 | 0.000128 | 0.000683 | 7        |   |
| 3842_at   | 3842   | ENSG000001TNPO1     | transportin transport   | I        | 29 | 0.518801 | 0.643535 | 0.747406 | 0.545821 | 1.07216  | 7.983878 | 51.17281 | 1.40E-05 | 0.000126 | 7        |   |
| 5585_at   | 5585   | ENSG000001PKN1      | protein kin kinase      | NI       | 10 | 0.528137 | 0.344302 | 1.222023 | 0.671426 | 0.336373 | 4.797486 | 24.37465 | 0.000189 | 0.000927 | 7        |   |
| 55330_at  | 55330  | ENSG000001CNO       | cappuccino homolog (l   | I        | 11 | 0.356421 | 0.355478 | 1.324911 | 0.656807 | 0.350263 | 7.321739 | 28.48982 | 0.00011  | 0.00061  | 7        |   |
| 285362_at | 285362 | ENSG000001SUMF1     | sulfatase modifying far | NI       | 30 | 0.428517 | 0.430088 | 1.184431 | 0.468728 | 0.413133 | 5.362383 | 33.9146  | 6.01E-05 | 0.000379 | 7        |   |
| 6228_at   | 6228   | ENSG000001RPS23     | ribosomal protein S23   | I        | 20 | 0.335807 | 0.235737 | 1.074714 | 0.603288 | 0.358814 | 11.56846 | 24.20719 | 0.000194 | 0.000944 | 7        |   |
| 100093630 | 1E+08  | NA SNHG8            | small nucleolar RNA hc  | I        | 17 | 0.358655 | 0.424416 | 1.013768 | 0.683211 | 0.568904 | 10.3607  | 36.63008 | 4.58E-05 | 0.000308 | 7        |   |
| 153241_at | 153241 | ENSG000001CEP120    | centrosomal protein 1:  | NI       | 22 | 0.20837  | 0.575506 | 1.043381 | 0.657552 | 0.521149 | 4.640387 | 30.82767 | 8.39E-05 | 0.000492 | 7        |   |
| 5176_at   | 5176   | ENSG000001SERPINF1  | serpin pept Secreted    | NI       | 52 | 0.143968 | 0.156657 | 1.233528 | 0.543518 | 0.481561 | 3.919389 | 23.3566  | 0.000219 | 0.001043 | 7        |   |
| 6044_at   | 6044   | NA SNORA62          | small nucleolar RNA, H  | NI       | 9  | 0.297397 | 0.154754 | 1.201758 | 0.436371 | 0.364651 | 5.425162 | 17.01167 | 0.00064  | 0.002492 | 7        |   |
| 135114_at | 135114 | ENSG000001HINT3     | histidine triad nucleot | NI       | 21 | 0.046529 | 0.293718 | 1.113365 | 0.418726 | 0.541354 | 5.675948 | 15.23326 | 0.000922 | 0.003367 | 7        |   |
| 55812_at  | 55812  | ENSG000001SPATA7    | spermatogenesis assor   | NI       | 11 | 0.19945  | 0.087245 | 1.152745 | 0.766011 | 0.511507 | 4.901981 | 29.46034 | 9.83E-05 | 0.000558 | 7        |   |
| 5265_at   | 5265   | ENSG000001SERPINA1  | serpin pept peptidase   | NI       | 35 | 0.188299 | 0.073651 | 1.251021 | 0.709339 | 0.407348 | 4.032826 | 37.58362 | 4.18E-05 | 0.000288 | 7        |   |
| 8334_at   | 8334   | ENSG000001HIST1H2AC | histone cluster 1, H2ac | I        | 11 | 0.535442 | -0.0537  | 1.258379 | 0.31602  | 0.591318 | 6.529913 | 41.05895 | 3.06E-05 | 0.000227 | 7        |   |
| 6674_at   | 6674   | ENSG000001SPAG1     | sperm associated anti   | NI       | 22 | 0.369572 | 0.069826 | 1.254614 | 0.280272 | 0.500775 | 6.94959  | 32.96154 | 6.64E-05 | 0.000409 | 7        |   |
| 119392_at | 119392 | ENSG000001SFR1      | SWI5-dependent recor    | NI       | 15 | 0.30345  | 0.201854 | 1.161898 | 0.202333 | 0.260263 | 6.770777 | 19.22175 | 0.000425 | 0.001786 | 7        |   |
| 2012_at   | 2012   | ENSG000001EMP1      | epithelial membrane p   | I        | 32 | 0.303893 | 0.353864 | 1.042034 | 0.776121 | 0.910682 | 8.376124 | 48.38728 | 1.71E-05 | 0.000147 | 7        |   |
| 163081_at | 163081 | ENSG000001ZNF567    | zinc finger protein 567 | NI       | 22 | 0.186144 | 0.387456 | 1.071096 | 0.698865 | 0.96145  | 4.352927 | 46.26081 | 2.00E-05 | 0.000164 | 7        |   |
| 23256_at  | 23256  | ENSG000001SCFD1     | sec1 family domain coi  | I        | 17 | 0.192271 | 0.372483 | 1.013841 | 0.729834 | 0.720294 | 8.352766 | 44.57893 | 2.28E-05 | 0.000181 | 7        |   |
| 345757_at | 345757 | ENSG000001FAM174A   | family with sequence s  | NI       | 16 | 0.339102 | 0.349565 | 1.329576 | 0.51153  | 0.855066 | 6.45492  | 41.94471 | 2.84E-05 | 0.000215 | 7        |   |
| 51567_at  | 51567  | ENSG000001TDP2      | tyrosyl-DNA phosphod    | I        | 22 | 0.404696 | 0.302538 | 1.169387 | 0.44015  | 0.750188 | 7.509074 | 40.35255 | 3.25E-05 | 0.000238 | 7        |   |
| 1027_at   | 1027   | ENSG000001CDKN1B    | cyclin-dependent kina   | I        | 22 | 0.095615 | 0.21446  | 1.108005 | 0.734596 | 1.157706 | 6.544665 | 44.81944 | 2.24E-05 | 0.000179 | 7        |   |
| 4082_at   | 4082   | ENSG000001MARCKS    | myristoylated alanine-  | I        | 13 | 0.275276 | 0.028455 | 1.063624 | 0.70813  | 1.175893 | 8.252433 | 16.01845 | 0.000781 | 0.002932 | 7        |   |
| 11162_at  | 11162  | ENSG000001NUDT6     | nudix (nucleoside diph  | NI       | 21 | 0.305374 | 0.194628 | 1.201881 | 0.864892 | 1.109537 | 6.478538 | 20.61791 | 0.000336 | 0.001471 | 7        |   |
| 2287_at   | 2287   | ENSG000001FKBP3     | FK506 binding protein   | I        | 8  | 0.000131 | -0.02854 | 1.347007 | 0.78     | 0.860704 | 8.772116 | 28.05029 | 0.000117 | 0.000635 | 7        |   |
| 3655_at   | 3655   | ENSG000001ITGA6     | integrin, al            | Secreted | I  | 31       | 0.138412 | -0.11181 | 1.148444 | 0.647912 | 0.896991 | 9.393179 | 22.49819 | 0.000249 | 0.001155 | 7 |
| 23512_at  | 23512  | ENSG000001SUZ12     | suppressor of zeste 12  | I        | 30 | 0.25923  | 0.273403 | 0.680279 | 0.590037 | 1.013407 | 8.152675 | 41.65741 | 2.91E-05 | 0.000218 | 7        |   |
| 81615_at  | 81615  | ENSG000001TMEM163   | transmembrane protei    | NI       | 22 | 0.244176 | 0.119402 | 0.60817  | 0.576385 | 1.008799 | 3.504884 | 25.86477 | 0.000154 | 0.000788 | 7        |   |
| 79982_at  | 79982  | ENSG000001DNAJB14   | DnaJ (Hsp4 Secreted     | NI       | 8  | 0.459896 | 0.210135 | 0.69025  | 0.534923 | 1.022348 | 7.720318 | 36.79973 | 4.51E-05 | 0.000304 | 7        |   |
| 114884_at | 114884 | ENSG000001OSBPPL10  | oxysterol binding prot  | NI       | 30 | 0.21523  | 0.347415 | 0.670838 | 0.869593 | 1.206183 | 5.148596 | 40.84763 | 3.12E-05 | 0.00023  | 7        |   |
| 414328_at | 414328 | ENSG000001C9orf103  | chromosom kinase        | NI       | 11 | 0.074398 | 0.292448 | 0.552147 | 0.74798  | 1.220066 | 4.188094 | 32.80337 | 6.75E-05 | 0.000415 | 7        |   |
| 157769_at | 157769 | ENSG000001FAM91A1   | family with sequence s  | NI       | 12 | -0.03613 | 0.112194 | 0.670466 | 0.400707 | 1.217888 | 7.577914 | 28.56509 | 0.000109 | 0.000605 | 7        |   |
| 64848_at  | 64848  | ENSG000001YTHDC2    | YTH domain containin    | NI       | 22 | 0.085102 | -0.06067 | 0.646709 | 0.586412 | 1.040361 | 4.576103 | 44.64874 | 2.27E-05 | 0.000181 | 7        |   |
| 6373_at   | 6373   | ENSG000001CXCL11    | chemokine Secreted      | NI       | 33 | 0.056359 | 0.004374 | 0.44932  | 0.678123 | 1.417464 | 3.607985 | 56.41924 | 9.84E-06 | 9.77E-05 | 7        |   |
| 10299_at  | 10299  | ENSG0000016-Mar     | membrane-associated     | NI       | 31 | 0.002604 | 0.029403 | 0.377583 | 0.184586 | 1.352958 | 8.242293 | 30.39545 | 8.82E-05 | 0.000511 | 7        |   |
| 55319_at  | 55319  | ENSG000001C4orf43   | chromosome 4 open r     | NI       | 10 | -0.23049 | -0.24432 | 0.962471 | 0.356533 | 1.241208 | 5.549791 | 41.17141 | 3.03E-05 | 0.000226 | 7        |   |
| 55015_at  | 55015  | ENSG000001PRPF39    | PRP39 pre-mRNA proc     | NI       | 11 | -0.34509 | -0.17028 | 0.830699 | 0.435676 | 1.032828 | 5.482027 | 17.56679 | 0.000575 | 0.002287 | 7        |   |
| 79725_at  | 79725  | ENSG000001THAP9     | THAP domain containi    | NI       | 11 | 0.073052 | -0.26449 | 0.919121 | 0.541563 | 1.076415 | 4.48865  | 11.33907 | 0.002387 | 0.007445 | 7        |   |
| 7846_at   | 7846   | ENSG000001TUBA1A    | tubulin, al             | α-GTPase | I  | 9        | -0.31523 | 0.234549 | 0.915199 | 0.71967  | 1.751517 | 10.14634 | 17.2735  | 0.000608 | 0.002392 | 7 |

|           |        |                    |                                    |    |    |          |          |          |          |           |          |          |          |          |   |
|-----------|--------|--------------------|------------------------------------|----|----|----------|----------|----------|----------|-----------|----------|----------|----------|----------|---|
| 54896_at  | 54896  | ENSG000001PQLC2    | PQ loop repeat contain             | NI | 10 | 0.006129 | -0.31239 | -0.08108 | -0.1986  | -1.00556  | 5.203909 | 23.13412 | 0.000227 | 0.001072 | 5 |
| 90850_at  | 90850  | ENSG000001ZNF598   | zinc finger protein 598            | NI | 3  | -0.06651 | -0.03306 | -0.5193  | -0.05116 | -1.05911  | 7.411215 | 11.16504 | 0.000250 | 0.007754 | 5 |
| 7087_at   | 7087   | ENSG000001ICAM5    | intercellular adhesion 5           | NI | 11 | -0.38767 | -0.13406 | -0.22692 | 0.027981 | -1.18524  | 4.523359 | 25.63684 | 0.000159 | 0.00806  | 5 |
| 646513_at | 646513 | NA LOC646513       | VLGN1945                           | NI | 3  | -0.28234 | 0.484417 | -0.46811 | -0.47361 | -1.37957  | 5.455913 | 17.24178 | 0.000612 | 0.002402 | 5 |
| 8372_at   | 8372   | ENSG000001HYAL3    | hyaluronoglycan Secreted           | NI | 11 | -0.49849 | 0.062128 | -0.49259 | -0.47709 | -1.29006  | 3.712246 | 18.09694 | 0.000521 | 0.002102 | 5 |
| 7867_at   | 7867   | ENSG000001MAPKAPK3 | mitogen-activated kinase 3         | I  | 21 | -0.01457 | -0.41804 | -0.35562 | -0.78927 | -1.10302  | 8.515331 | 26.30007 | 0.000146 | 0.000755 | 5 |
| 5874_at   | 5874   | ENSG000001RAB27B   | RAB27B, mGTPase 1                  | I  | 11 | -0.16002 | -0.16807 | -0.39921 | -0.98838 | -1.14268  | 5.088346 | 21.56403 | 0.000288 | 0.001297 | 5 |
| 84164_at  | 84164  | ENSG000001ASCC2    | activating signal cointeracting    | NI | 9  | 0.159286 | -0.08461 | -0.51219 | -0.56682 | -1.16035  | 6.250209 | 26.00203 | 0.000152 | 0.000778 | 5 |
| 11336_at  | 11336  | ENSG000001EXOC3    | exocyst complex component          | NI | 11 | -0.22247 | -0.36345 | -0.35536 | -0.45635 | -1.0215   | 6.977648 | 10.36478 | 0.003162 | 0.009449 | 5 |
| 10636_at  | 10636  | ENSG000001RGS1     | regulator of G-protein signaling   | NI | 22 | -0.09641 | -0.36786 | -0.50496 | -0.57809 | -1.0559   | 4.064875 | 42.57077 | 2.69E-05 | 0.000206 | 5 |
| 27076_at  | 27076  | ENSG000001LYPD3    | LY6/PLAUR Secreted                 | NI | 11 | 0.221468 | 0.051102 | -0.10549 | -0.39866 | 0.023419  | 4.03891  | 13.15765 | 0.001485 | 0.005    | 5 |
| 339521_at | 339521 | NA FAM58BP         | family with sequence similarity    | NI | 17 | 0.472808 | 0.17182  | -1.03519 | -0.1589  | -0.59928  | 4.538772 | 32.39306 | 7.06E-05 | 0.00043  | 5 |
| 7480_at   | 7480   | ENSG000001WNT10B   | wingless-type Secreted             | NI | 11 | -0.14731 | -0.10726 | -1.35949 | -0.32245 | -1.20758  | 4.958026 | 62.17401 | 6.93E-06 | 7.63E-05 | 5 |
| 9605_at   | 9605   | ENSG000001C16orf7  | chromosome 16 open reading         | I  | 11 | -0.13468 | -0.09208 | -1.02466 | -0.24989 | -0.34923  | 5.200559 | 13.59713 | 0.001335 | 0.004576 | 5 |
| 2874_at   | 2874   | ENSG000001GPS2     | G protein pathway suppressor       | I  | 5  | -0.29425 | -0.06285 | -1.0308  | -0.48004 | -0.71086  | 8.785601 | 32.71342 | 6.82E-05 | 0.000417 | 5 |
| 84283_at  | 84283  | ENSG000001TMEM79   | transmembrane protein 79           | NI | 11 | -0.54627 | -0.13635 | -1.04143 | -0.2157  | -0.66225  | 4.27344  | 30.01195 | 9.22E-05 | 0.000529 | 5 |
| 10148_at  | 10148  | ENSG000001EBI3     | Epstein-Barr Secreted              | NI | 11 | -0.13617 | -0.71066 | -1.39046 | -0.45554 | -0.74504  | 4.200206 | 55.4813  | 1.04E-05 | 0.000102 | 5 |
| 2784_at   | 2784   | ENSG000001GNB3     | guanine nucleotide-binding         | NI | 11 | -0.62467 | -0.61421 | -1.54601 | -0.55834 | -0.78915  | 4.421498 | 75.96175 | 3.36E-06 | 4.63E-05 | 5 |
| 1844_at   | 1844   | ENSG000001DUSP2    | dual-specific phosphatase          | NI | 11 | -0.47586 | -0.29261 | -1.21394 | -0.87412 | -0.51939  | 4.190969 | 18.29315 | 0.000502 | 0.002041 | 5 |
| 8078_at   | 8078   | ENSG000001USP5     | ubiquitin-specific peptidase       | NI | 9  | -0.47988 | -0.2027  | -1.0771  | -0.54336 | -0.86518  | 6.334775 | 15.78263 | 0.000082 | 0.003061 | 5 |
| 60673_at  | 60673  | ENSG000001C12orf44 | chromosome 12 open reading         | I  | 11 | -0.61323 | -0.35482 | -1.22213 | -0.62997 | -0.92825  | 8.31819  | 35.31386 | 5.21E-05 | 0.000341 | 5 |
| 150356_at | 150356 | ENSG000001CHADL    | chondroadherin-like                | NI | 11 | -0.76124 | -0.21121 | -1.29872 | -0.38458 | -0.54414  | 4.462429 | 12.87605 | 0.001592 | 0.005314 | 5 |
| 6663_at   | 6663   | ENSG000001SOX10    | SRY (sex determining region)       | NI | 22 | -0.49022 | -0.31026 | -1.26451 | -0.53395 | -0.57532  | 3.803173 | 31.42887 | 7.85E-05 | 0.000467 | 5 |
| 83861_at  | 83861  | ENSG000001RSPH3    | radial spoke 3 homolog             | NI | 10 | -0.60599 | -0.50049 | -1.08809 | -0.47404 | -0.62495  | 4.253471 | 51.74245 | 1.34E-05 | 0.000122 | 5 |
| 255783_at | 255783 | NA PRR24           | proline rich 24                    | NI | 11 | -0.53427 | -0.41463 | -1.19441 | -0.45289 | -0.71389  | 5.282701 | 42.90929 | 2.62E-05 | 0.000202 | 5 |
| 91445_at  | 91445  | ENSG000001RNF185   | ring finger protein 185            | NI | 6  | -0.1908  | -1.1536  | -0.90471 | -0.38629 | -0.44735  | 4.476712 | 10.76789 | 0.002807 | 0.008535 | 5 |
| 133690_at | 133690 | ENSG000001CAPSL    | calcyphosine-like                  | NI | 8  | -0.45054 | -1.04482 | -0.56636 | -0.40981 | -0.76553  | 3.622735 | 35.52455 | 5.10E-05 | 0.000335 | 5 |
| 125061_at | 125061 | ENSG000001AFMID    | arylfornamidase                    | NI | 11 | -0.20328 | -0.99169 | -1.18056 | -0.68709 | -0.44988  | 5.348895 | 15.13686 | 0.000941 | 0.003427 | 5 |
| 27314_at  | 27314  | ENSG000001RAB30    | RAB30, mGTPase 1                   | NI | 22 | -0.11651 | -0.63545 | -1.05045 | -0.56412 | -0.46267  | 4.791132 | 21.9435  | 0.000271 | 0.001241 | 5 |
| 84824_at  | 84824  | ENSG000001FCRLA    | Fc receptor Secreted               | NI | 40 | -0.44569 | -0.75936 | -1.00634 | -0.62673 | -0.5151   | 4.250884 | 45.30131 | 2.16E-05 | 0.000174 | 5 |
| 400506_at | 400506 | ENSG000001C16orf88 | chromosome 16 open reading         | I  | 20 | -0.19597 | -0.72345 | -0.84898 | -1.04862 | -0.63862  | 6.494144 | 63.02695 | 6.60E-06 | 7.36E-05 | 5 |
| 1513_at   | 1513   | ENSG000001CTSK     | cathepsin K peptidase              | NI | 11 | -0.05693 | -0.96464 | -1.06283 | -0.86163 | -0.93908  | 5.037142 | 21.59106 | 0.000287 | 0.001293 | 5 |
| 1016_at   | 1016   | ENSG000001CDH18    | cadherin 18, type 2                | NI | 20 | -0.28396 | -1.06515 | -0.80103 | -0.7157  | -0.93121  | 3.812019 | 64.5254  | 6.07E-06 | 6.96E-05 | 5 |
| 51400_at  | 51400  | ENSG000001PPME1    | protein phosphatase 1              | NI | 11 | -0.32742 | -0.91174 | -0.87552 | -0.7018  | -1.00161  | 6.766773 | 15.68098 | 0.000838 | 0.003115 | 5 |
| 5118_at   | 5118   | ENSG000001PCOLCE   | procollagen Secreted               | NI | 11 | -0.27159 | -1.19438 | -1.45544 | -0.9189  | -0.56911  | 4.977811 | 14.1687  | 0.001168 | 0.0041   | 5 |
| 727936_at | 727936 | ENSG000001GYLT2    | glucosylated xylosyltransferase    | I  | 11 | -0.40677 | -1.309   | -1.33811 | -1.0623  | -0.63929  | 6.491909 | 27.547   | 0.000124 | 0.000668 | 5 |
| 26052_at  | 26052  | ENSG000001DNM3     | dynamitin 3 GTPase                 | NI | 9  | -0.62997 | -1.0711  | -1.38114 | -0.53592 | -0.121148 | 4.124396 | 47.46852 | 1.83E-05 | 0.000154 | 5 |
| 29066_at  | 29066  | ENSG000001ZC3H7A   | zinc finger CCCH-type 7A           | I  | 32 | -0.77866 | -1.10217 | -0.87738 | -0.59941 | -0.05559  | 7.479014 | 36.75477 | 4.53E-05 | 0.000305 | 5 |
| 10208_at  | 10208  | ENSG000001USPL1    | ubiquitin-specific peptidase       | NI | 11 | -0.73384 | -1.17916 | -0.9355  | -0.64219 | -0.00382  | 6.195702 | 36.80455 | 4.51E-05 | 0.000304 | 5 |
| 80071_at  | 80071  | ENSG000001CCDC15   | coiled-coil domain containing      | NI | 11 | -0.4904  | -1.38116 | -1.0635  | -0.89981 | -0.3264   | 5.587422 | 72.46602 | 3.99E-06 | 5.17E-05 | 5 |
| 148398_at | 148398 | ENSG000001SAMD11   | sterile alpha motif domain         | NI | 10 | -0.75574 | -1.14238 | -0.95247 | -0.86337 | -0.37501  | 5.258168 | 71.11549 | 4.27E-06 | 5.41E-05 | 5 |
| 2009_at   | 2009   | ENSG000001EML1     | echinoderm microtubule             | NI | 54 | -0.77015 | -1.2269  | -1.01812 | -0.84985 | -0.35442  | 4.16904  | 75.21069 | 3.49E-06 | 4.73E-05 | 5 |
| 261726_at | 261726 | ENSG000001TIPR1    | TIP41, TOR signaling protein       | I  | 31 | -0.81513 | -1.22629 | -0.81595 | -0.81023 | -0.42745  | 7.820892 | 63.72277 | 6.35E-06 | 7.17E-05 | 5 |
| 2033_at   | 2033   | ENSG000001EP300    | E1A binding protein p300           | I  | 10 | -0.76876 | -1.15194 | -0.82974 | -0.86574 | -0.23268  | 6.725337 | 69.33191 | 4.68E-06 | 5.76E-05 | 5 |
| 54704_at  | 54704  | ENSG000001PDP1     | pyruvate dehydrogenase             | I  | 33 | -0.83765 | -1.19955 | -0.88973 | -0.79634 | -0.23177  | 8.727657 | 18.01167 | 0.000529 | 0.002129 | 5 |
| 719_at    | 719    | ENSG000001C3AR1    | complement C3A-related             | NI | 11 | -0.10045 | -1.59122 | -0.33231 | -0.85158 | -0.66946  | 4.097252 | 92.10417 | 1.67E-06 | 2.87E-05 | 5 |
| 128486_at | 128486 | ENSG000001FITM2    | fat storage-inducing transmembrane | NI | 11 | -0.32927 | -1.58158 | -0.90074 | -0.76189 | -0.68258  | 5.216517 | 88.64163 | 1.92E-06 | 3.13E-05 | 5 |
| 1431_at   | 1431   | ENSG000001CS       | citrate synthase                   | NI | 4  | -0.28848 | -1.12844 | -0.19949 | -0.71504 | -0.65571  | 5.295706 | 42.10015 | 2.80E-05 | 0.000212 | 5 |
| 339761_at | 339761 | ENSG000001CYP27C1  | cytochrome P450, family 27         | NI | 11 | -0.63264 | -1.07719 | -0.01632 | -0.93606 | -0.57408  | 3.541039 | 20.74547 | 0.000329 | 0.001445 | 5 |
| 26191_at  | 26191  | ENSG000001PTPN22   | protein tyrosine phosphatase       | NI | 28 | -0.1879  | -0.95562 | -0.16556 | -1.16543 | -0.91365  | 4.411748 | 74.89663 | 3.54E-06 | 4.77E-05 | 5 |
| 255928_at | 255928 | ENSG000001SYT14    | synaptotagmin Secreted             | I  | 22 | -0.59429 | -0.64459 | -0.3319  | -1.23749 | -0.64339  | 3.681088 | 64.15491 | 6.19E-06 | 7.04E-05 | 5 |
| 23515_at  | 23515  | ENSG000001MORC3    | MORC family transporter            | I  | 22 | -0.69555 | -1.40694 | -0.28855 | -0.46275 | 0.004389  | 6.88303  | 27.34876 | 0.000127 | 0.00068  | 5 |
| 5290_at   | 5290   | ENSG000001PIK3CA   | phosphoinositide kinase            | I  | 11 | -0.51454 | -1.09658 | -0.27237 | -0.4435  | -0.04236  | 7.835548 | 16.43528 | 0.000718 | 0.002736 | 5 |
| 79572_at  | 79572  | ENSG000001ATP13A3  | ATPase type 13A3                   | I  | 11 | -0.5578  | -1.04304 | -0.46852 | -0.38503 | -0.04698  | 9.119903 | 24.05454 | 0.000198 | 0.000961 | 5 |
| 51136_at  | 51136  | ENSG000001RNFT1    | ring finger protein, trimeric      | NI | 22 | -0.61595 | -1.02024 | -1.13819 | -0.40996 | -0.15034  | 5.427646 | 27.04956 | 0.000132 | 0.0007   | 5 |
| 4686_at   | 4686   | ENSG000001NCBP1    | nuclear cap binding protein        | NI | 20 | -0.6551  | -1.04339 | -0.23053 | -0.52221 | -0.23453  | 7.827109 | 28.35028 | 0.000112 | 0.000617 | 5 |
| 440567_at | 440567 | ENSG000001UQCRLH   | ubiquinol-C transporter            | I  | 11 | -0.93535 | -1.11143 | -0.11169 | -0.57942 | -0.23071  | 7.321013 | 23.59278 | 0.000212 | 0.001015 | 5 |
| 26973_at  | 26973  | ENSG000001CHORDC1  | cysteine and histidine-binding     | I  | 25 | -0.9812  | -1.00136 | -0.22651 | -0.6941  | -0.19813  | 6.798611 | 33.02266 | 6.60E-05 | 0.000408 | 5 |
| 4751_at   | 4751   | ENSG000001NEK2     | NIMA (neurokinin kinase)           | NI | 61 | -1.067   | -1.01591 | -1.16335 | -0.48307 | -0.05379  | 6.034782 | 34.81651 | 5.48E-05 | 0.000354 | 5 |
| 23251_at  | 23251  | ENSG000001KIAA1024 | KIAA1024                           | NI | 11 | -1.0487  | -0.92537 | -0.0335  | -0.55098 | -0.0796   | 3.935697 | 16.5577  | 0.0007   | 0.002686 | 5 |
| 23527_at  | 23527  | ENSG000001ACAP2    | ArfGAP with coiled-coil domain     | NI | 21 | -1.04717 | -0.8792  | -0.08404 | -0.58319 | -0.10008  | 5.145479 | 47.7818  | 1.78E-05 | 0.000152 | 5 |
| 9541_at   | 9541   | ENSG000001CIR1     | corepressor interacting            | NI | 10 | -1.03389 | -1.1397  | -0.41128 | -0.37377 | -0.27471  | 7.205143 | 36.01331 | 4.86E-05 | 0.000322 | 5 |
| 51258_at  | 51258  | ENSG000001MRPL51   | mitochondrial ribosomal            | I  | 10 | -1.00399 | -1.15957 | -0.31173 | -0.48073 | -0.36781  | 11.27777 | 48.21418 | 1.73E-05 | 0.000149 | 5 |
| 56133_at  | 56133  | ENSG000001PCDH2    | protocadherin beta 2               | I  | 17 | -1.00693 | -0.95007 | -0.17773 | -0.38212 | -0.6264   | 6.9886   | 50.8785  | 1.42E-05 | 0.000128 | 5 |
| 7770_at   | 7770   | ENSG000001ZNF227   | zinc finger protein 227            | NI | 11 | -0.91501 | -1.1479  | -0.04301 | -0.40416 | -0.31411  | 6.76     | 31.90416 | 7.44E-05 | 0.000448 | 5 |
| 6302_at   | 6302   | ENSG000001TSPAN31  | transmembrane 31                   | NI | 22 | -0.97658 | -1.17984 | -0.00537 | -0.52217 | -0.50758  | 5.271493 | 45.09075 | 2.19E-05 | 0.000177 | 5 |
| 3685_at   | 3685   | ENSG000001ITGAV    | integrin, alpha V (vitronectin)    | NI | 52 | -0.88166 | -1.13818 | -0.47085 | -0.84909 | -0.01022  | 4.56031  | 60.87579 | 7.48E-06 | 8.00E-05 | 5 |
| 199221_at | 199221 | ENSG000001DZIP1L   | DAZ interacting protein            | NI | 1  |          |          |          |          |           |          |          |          |          |   |

|           |        |                    |                             |                         |          |          |          |          |          |          |          |          |          |          |   |
|-----------|--------|--------------------|-----------------------------|-------------------------|----------|----------|----------|----------|----------|----------|----------|----------|----------|----------|---|
| 55843_at  | 55843  | ENSG000001ARHGAP15 | Rho GTPase activating NI    | 19                      | -0.78332 | -1.04785 | -0.52732 | -0.75003 | -0.40466 | 3.765954 | 10.78351 | 0.002795 | 0.008502 | 5        |   |
| 401466_at | 401466 | ENSG000001C8orf59  | chromosome 8 open r r l     | 25                      | -0.8308  | -1.07821 | -0.61617 | -0.84112 | -0.73412 | 8.848543 | 43.78466 | 2.43E-05 | 0.000191 | 5        |   |
| 6894_at   | 6894   | ENSG000001TARBP1   | TAR (HIV-1) RNA bindi l     | 11                      | -0.96    | -1.01597 | -0.5005  | -0.83987 | -0.76208 | 7.043726 | 60.96286 | 7.44E-06 | 7.99E-05 | 5        |   |
| 191_at    | 191    | ENSG000001AHCY     | adenosylhomocystein: l      | 18                      | -0.93659 | -1.04778 | -0.58765 | -0.70952 | -0.76592 | 9.376145 | 49.70112 | 1.55E-05 | 0.000137 | 5        |   |
| 85415_at  | 85415  | ENSG000001RHPN2    | rhopilin, Rho GTPase NI     | 17                      | -0.93134 | -1.07409 | -0.58731 | -0.79131 | -0.68725 | 5.824884 | 39.0824  | 3.64E-05 | 0.000259 | 5        |   |
| 375444_at | 375444 | ENSG000001C5orf34  | chromosome 5 open r r l     | 21                      | -0.96545 | -1.00948 | -0.60682 | -0.77083 | -0.72485 | 5.358659 | 66.24057 | 5.52E-06 | 6.49E-05 | 5        |   |
| 51506_at  | 51506  | ENSG000001UFC1     | ubiquitin-fold modifier l   | 9                       | -1.07319 | -1.10914 | -0.426   | -0.71488 | -0.44884 | 9.537002 | 68.6917  | 4.84E-06 | 5.90E-05 | 5        |   |
| 780_at    | 780    | NA                 | DDR1                        | discoidin d kinase l    | 40       | -1.13486 | -1.0726  | -0.40971 | -0.70971 | -0.56819 | 6.120203 | 48.54396 | 1.69E-05 | 0.000146 | 5 |
| 54842_at  | 54842  | ENSG000001MFS06    | major facilitator super l   | 33                      | -1.13808 | -1.1261  | -0.438   | -0.89668 | -0.66948 | 6.17463  | 37.25792 | 4.31E-05 | 0.000294 | 5        |   |
| 146754_at | 146754 | ENSG000001DNAH2    | dynein, axonemal, hea l     | 20                      | -1.18084 | -1.17392 | -0.57531 | -0.79095 | -0.5439  | 6.770452 | 65.76641 | 5.66E-06 | 6.62E-05 | 5        |   |
| 6120_at   | 6120   | ENSG000001RPE      | ribulose-5-phosphate- l     | 34                      | -1.10171 | -1.10324 | -0.58072 | -0.81809 | -0.47017 | 7.182677 | 64.92013 | 5.93E-06 | 6.85E-05 | 5        |   |
| 8675_at   | 8675   | NA                 | STX16                       | syntaxin 16 Secreted l  | 59       | -1.05776 | -1.12073 | -0.62973 | -0.83476 | -0.56638 | 8.29198  | 70.98922 | 4.30E-06 | 5.42E-05 | 5 |
| 2059_at   | 2059   | ENSG000001EPS8     | epidermal growth fact l     | 31                      | -0.59714 | -1.01523 | -0.42419 | -0.76975 | -0.4472  | 6.665322 | 19.69041 | 0.000392 | 0.001671 | 5        |   |
| 4999_at   | 4999   | ENSG000001ORC2     | origin recognition com NI   | 32                      | -0.53677 | -1.07819 | -0.4314  | -0.7209  | -0.54548 | 5.866735 | 42.2209  | 2.77E-05 | 0.000211 | 5        |   |
| 54103_at  | 54103  | ENSG000001PION     | pigeon homolog (Dros l      | 30                      | -0.65172 | -1.11693 | -0.53574 | -0.70452 | -0.74455 | 5.768511 | 56.42826 | 9.83E-06 | 9.77E-05 | 5        |   |
| 427_at    | 427    | ENSG000001ASAH1    | N-acylsphir Secreted l      | 52                      | -0.65205 | -1.01262 | -0.6582  | -0.75645 | -0.77145 | 7.712229 | 25.26866 | 0.000167 | 0.00084  | 5        |   |
| 63926_at  | 63926  | ENSG000001ANKRD5   | ankyrin repeat domain NI    | 19                      | -0.60582 | -1.07723 | -0.41346 | -0.99957 | -0.73562 | 4.184096 | 59.5571  | 8.10E-06 | 8.45E-05 | 5        |   |
| 483_at    | 483    | ENSG000001ATP1B3   | ATPase, Na transport l      | 14                      | -0.56401 | -1.03949 | -0.63471 | -0.91755 | -0.5728  | 9.009761 | 64.48287 | 6.08E-06 | 6.97E-05 | 5        |   |
| 83941_at  | 83941  | ENSG000001TM2D1    | TM2 domain containin l      | 8                       | -0.57891 | -1.13732 | -0.61132 | -0.89702 | -0.67945 | 8.862993 | 40.35392 | 3.25E-05 | 0.000238 | 5        |   |
| 56986_at  | 56986  | ENSG000001DTWD1    | DTW domain containir NI     | 32                      | -0.75242 | -1.34735 | -0.47004 | -0.79995 | -0.50904 | 5.765248 | 65.29757 | 5.81E-06 | 6.75E-05 | 5        |   |
| 874_at    | 874    | ENSG000001CBR3     | carbonyl reductase 3 l      | 11                      | -0.84404 | -1.12077 | -0.3993  | -0.6407  | -0.57604 | 8.380523 | 35.893   | 4.92E-05 | 0.000325 | 5        |   |
| 64421_at  | 64421  | ENSG000001DCLRE1C  | DNA cross-link repair l     | 22                      | -0.90562 | -1.19417 | -0.48262 | -0.70228 | -0.65754 | 6.398876 | 35.28979 | 5.22E-05 | 0.000341 | 5        |   |
| 79149_at  | 79149  | ENSG000001ZSCAN5A  | zinc finger and SCAN d NI   | 8                       | -0.86536 | -1.22617 | -0.66624 | -0.92777 | -0.50018 | 4.598119 | 13.49536 | 0.001368 | 0.004665 | 5        |   |
| 960_at    | 960    | ENSG000001CD44     | CD44 mole Secreted l        | 109                     | -0.93102 | -1.19227 | -0.55968 | -0.98417 | -0.6009  | 10.45143 | 61.01651 | 7.42E-06 | 7.97E-05 | 5        |   |
| 116843_at | 116843 | ENSG000001C6orf192 | chromosom transportel l     | 20                      | -0.72803 | -1.05644 | -0.59976 | -0.95605 | -0.39282 | 7.039619 | 61.94134 | 7.03E-06 | 7.67E-05 | 5        |   |
| 51110_at  | 51110  | ENSG000001LACTB2   | lactamase, beta 2 l         | 14                      | -0.79996 | -1.04944 | -0.68124 | -0.95571 | -0.54826 | 9.283248 | 61.67982 | 7.14E-06 | 7.75E-05 | 5        |   |
| 54931_at  | 54931  | ENSG000001RG9MTD1  | RNA (guanine-9-) mettl l    | 22                      | -0.73841 | -1.08072 | -0.63676 | -0.78886 | -0.46966 | 9.337731 | 71.25586 | 4.24E-06 | 5.39E-05 | 5        |   |
| 7707_at   | 7707   | ENSG000001ZNF148   | zinc finger protein 148 NI  | 97                      | -0.76833 | -1.12752 | -0.74568 | -0.85285 | -0.49394 | 6.423862 | 54.44783 | 1.12E-05 | 0.000107 | 5        |   |
| 9317_at   | 9317   | ENSG000001PTER     | phosphotriesterase rel l    | 44                      | -0.77376 | -1.15086 | -0.6659  | -0.90627 | -0.51422 | 7.289247 | 77.65724 | 3.10E-06 | 4.37E-05 | 5        |   |
| 138255_at | 138255 | ENSG000001C9orf135 | chromosome 9 open r r NI    | 10                      | -2.17324 | -0.86432 | -1.2943  | -0.08828 | -0.20847 | 3.699778 | 73.8124  | 3.73E-06 | 4.94E-05 | 5        |   |
| 4340_at   | 4340   | NA                 | MOG                         | myelin oligodendrocyt l | 42       | -1.75461 | -0.85244 | -1.43751 | -0.4579  | -0.38666 | 3.57179  | 102.4956 | 1.13E-06 | 2.23E-05 | 5 |
| 25758_at  | 25758  | ENSG000001C11orf41 | chromosome 11 open NI       | 22                      | -1.67241 | -1.0639  | -1.51392 | -0.54709 | -0.77794 | 4.139516 | 29.63655 | 9.63E-05 | 0.000548 | 5        |   |
| 10100_at  | 10100  | ENSG000001TSPAN2   | tetraspanin 2 NI            | 28                      | -0.7171  | -0.27721 | -1.25512 | -0.14572 | -0.1807  | 3.481929 | 28.49825 | 0.00011  | 0.00061  | 5        |   |
| 347733_at | 347733 | ENSG000001TUBB2B   | tubulin, be GTPase NI       | 11                      | -1.27969 | -0.50905 | -1.16922 | -0.44325 | -0.57438 | 4.176076 | 64.57863 | 6.05E-06 | 6.94E-05 | 5        |   |
| 3897_at   | 3897   | ENSG000001L1CAM    | L1 cell adhesion molec NI   | 21                      | -1.20658 | -0.42042 | -0.83887 | -0.40309 | -0.37196 | 5.578397 | 57.53568 | 9.17E-06 | 9.27E-05 | 5        |   |
| 23596_at  | 23596  | ENSG000001OPN3     | opsin 3 G-protein c NI      | 11                      | -1.16241 | -0.37815 | -0.92996 | -0.25713 | -0.56277 | 6.365435 | 29.52    | 9.76E-05 | 0.000554 | 5        |   |
| 3709_at   | 3709   | ENSG000001ITPR2    | inositol 1,4 ion channe NI  | 31                      | -1.44918 | -0.91714 | -0.71045 | -0.43369 | -0.10774 | 4.519689 | 72.01379 | 4.08E-06 | 5.24E-05 | 5        |   |
| 387763_at | 387763 | ENSG000001C11orf96 | chromosome 11 open NI       | 11                      | -1.52161 | -0.47963 | -0.57618 | -0.49778 | -0.36365 | 4.131078 | 17.49045 | 0.000583 | 0.002314 | 5        |   |
| 25960_at  | 25960  | ENSG000001GPR124   | G protein-c G-protein c NI  | 22                      | -1.65712 | -0.56065 | -0.96733 | -0.34506 | -0.41974 | 3.897471 | 86.16901 | 2.13E-06 | 3.39E-05 | 5        |   |
| 84626_at  | 84626  | ENSG000001KRBA1    | KRAB-A domain contai NI     | 11                      | -1.65866 | -0.75435 | -0.98531 | -0.55338 | -0.33883 | 4.720033 | 33.9294  | 6.00E-05 | 0.000379 | 5        |   |
| 7486_at   | 7486   | ENSG000001WRN      | Werner syndrome, Rec NI     | 11                      | -1.31095 | -0.50232 | -0.22562 | -0.71444 | -0.0938  | 5.676711 | 18.42871 | 0.00049  | 0.002004 | 5        |   |
| 94039_at  | 94039  | ENSG000001ZNF101   | zinc finger protein 101 NI  | 19                      | -1.18821 | -0.32449 | -0.49424 | -0.93759 | -0.38826 | 4.375765 | 32.73708 | 6.80E-05 | 0.000417 | 5        |   |
| 90381_at  | 90381  | ENSG000001C15orf42 | chromosome 15 open NI       | 11                      | -1.05358 | -0.25143 | -0.41635 | -0.53647 | -0.55883 | 4.814789 | 23.31125 | 0.000221 | 0.00105  | 5        |   |
| 57210_at  | 57210  | ENSG000001SLC45A4  | solute carrier family 45 NI | 10                      | -1.07483 | -0.47666 | -0.37315 | -0.83317 | -0.64245 | 5.968785 | 30.95945 | 8.27E-05 | 0.000487 | 5        |   |
| 51390_at  | 51390  | ENSG000001AIG1     | androgen-induced 1 l        | 10                      | -1.04071 | -0.3885  | -0.62852 | -0.71155 | -0.67941 | 7.106682 | 38.1151  | 3.98E-05 | 0.000277 | 5        |   |
| 84984_at  | 84984  | ENSG000001CEP19    | centrosomal protein 19 NI   | 22                      | -1.00388 | -0.62177 | -0.43618 | -0.48992 | -0.19297 | 5.916723 | 34.35492 | 5.74E-05 | 0.000366 | 5        |   |
| 175_at    | 175    | ENSG000001AGA      | aspartylglu Secreted NI     | 32                      | -1.00722 | -0.92409 | -0.49846 | -0.33838 | -0.2565  | 6.989305 | 21.74208 | 0.00028  | 0.00127  | 5        |   |
| 30011_at  | 30011  | ENSG000001SH3KBP1  | SH3-domai kinase l          | 38                      | -1.03267 | -0.88069 | -0.48065 | -0.42302 | -0.38971 | 8.430871 | 23.03437 | 0.00023  | 0.001085 | 5        |   |
| 1952_at   | 1952   | ENSG000001CELSR2   | cadherin, E G-protein c NI  | 22                      | -1.22429 | -0.89223 | -0.71696 | -0.60318 | -0.07372 | 4.738029 | 15.59601 | 0.000853 | 0.003161 | 5        |   |
| 2744_at   | 2744   | ENSG000001GLS      | glutaminase NI              | 31                      | -1.10917 | -0.91319 | -0.82209 | -0.67125 | -0.21859 | 4.622414 | 14.62985 | 0.001052 | 0.003759 | 5        |   |
| 2633_at   | 2633   | ENSG000001GBP1     | guanylate l GTPase l        | 36                      | -0.92904 | -1.04625 | -0.59936 | -0.53409 | -0.21905 | 6.864778 | 12.16821 | 0.001908 | 0.006176 | 5        |   |
| 51380_at  | 51380  | ENSG000001CSAD     | cysteine su Secreted NI     | 20                      | -1.00747 | -0.87046 | -0.58714 | -0.6382  | -0.12887 | 3.953972 | 39.85818 | 3.40E-05 | 0.000246 | 5        |   |
| 54965_at  | 54965  | ENSG000001PIGX     | phosphatidylinositol gl l   | 33                      | -1.03019 | -0.99115 | -0.50754 | -0.64695 | -0.10461 | 7.264537 | 57.81372 | 9.01E-06 | 9.17E-05 | 5        |   |
| 6642_at   | 6642   | ENSG000001SNX1     | sorting nex transportel l   | 21                      | -1.04327 | -0.78631 | -0.87145 | -0.4392  | -0.47901 | 7.295629 | 61.29059 | 7.30E-06 | 7.88E-05 | 5        |   |
| 79090_at  | 79090  | ENSG000001TRAPPC6A | trafficking protein part NI | 9                       | -1.09616 | -0.78605 | -0.80915 | -0.61052 | -0.40684 | 4.697641 | 29.61596 | 9.65E-05 | 0.000549 | 5        |   |
| 1827_at   | 1827   | ENSG000001RCAN1    | regulator of calcineurin l  | 49                      | -1.162   | -0.59411 | -0.63216 | -0.32137 | -0.52593 | 8.724929 | 14.50739 | 0.001082 | 0.003846 | 5        |   |
| 5337_at   | 5337   | ENSG000001PLD1     | phospholipase D1, phc NI    | 32                      | -1.21629 | -0.72595 | -0.48951 | -0.38672 | -0.50877 | 5.326073 | 54.70952 | 1.10E-05 | 0.000106 | 5        |   |
| 6470_at   | 6470   | ENSG000001SHMT1    | serine hydroxymethylt NI    | 36                      | -1.18726 | -0.84315 | -0.6361  | -0.42965 | -0.534   | 5.586384 | 40.92531 | 3.10E-05 | 0.000229 | 5        |   |
| 6715_at   | 6715   | ENSG000001SRD5A1   | steroid-5-alpha-reduct NI   | 32                      | -1.22794 | -0.59959 | -0.30617 | -0.40109 | -0.44745 | 5.082165 | 29.02276 | 0.000104 | 0.000581 | 5        |   |
| 201299_at | 201299 | ENSG000001RDM1     | RAD52 motif 1 NI            | 56                      | -1.13592 | -0.56713 | -0.33622 | -0.59432 | -0.66493 | 3.79365  | 38.42893 | 3.87E-05 | 0.000271 | 5        |   |
| 10123_at  | 10123  | ENSG000001ARL4C    | ADP-ribosy GTPase l         | 31                      | -1.0131  | -0.61834 | -0.35904 | -0.62984 | -0.50301 | 10.00082 | 23.83009 | 0.000205 | 0.000986 | 5        |   |
| 84223_at  | 84223  | ENSG000001IQCG     | IQ motif containing G NI    | 11                      | -1.1459  | -0.69056 | -0.31641 | -0.5897  | -0.53963 | 4.848296 | 17.81466 | 0.000549 | 0.002201 | 5        |   |
| 10855_at  | 10855  | ENSG000001HPSE     | heparanase Secreted NI      | 19                      | -1.29161 | -0.76154 | -0.42325 | -0.75856 | -0.72967 | 5.834288 | 61.01162 | 7.42E-06 | 7.97E-05 | 5        |   |
| 26355_at  | 26355  | ENSG000001FAM162A  | family with sequence s l    | 8                       | -1.09869 | -0.87618 | -0.32624 | -0.59516 | -0.67333 | 9.764908 | 32.23036 | 7.18E-05 | 0.000436 | 5        |   |
| 144363_at | 144363 | ENSG000001LYRM5    | LYR motif containing 5 NI   | 8                       | -1.12125 | -1.00327 | -0.45444 | -0.64511 | -0.73786 | 4.753893 | 30.71571 | 8.50E-05 | 0.000496 | 5        |   |
| 6596_at   | 6596   | ENSG000001HLTF     | helicase-like transcript l  | 22                      | -1.02637 | -0.77264 | -0.4337  | -0.64436 | -0.39077 | 7.091588 | 35.23556 | 5.25E-05 | 0.000342 | 5        |   |
| 9111_at   | 9111   | ENSG000001NMI      | N-myc (and STAT) inte l     | 52                      | -1.05254 | -0.84613 | -0.47889 | -0.71173 | -0.58409 | 8.152659 | 38.59269 | 3.81E-05 | 0.000268 | 5        |   |
| 55179_at  | 55179  | ENSG000001FAIM     | Fas apoptotic inhibitor NI  | 22                      | -1.28496 | -0.87738 | -0.28402 | -0.5983  | -0.33958 | 5.917611 | 49.67044 | 1.55E-05 | 0.000137 | 5        |   |
| 81671_at  | 81671  | ENSG000001VMP1     | vacuole membrane prc l      | 19                      | -1.3347  | -0.78154 | -0.40365 | -0.59475 | -0.53837 | 9.329436 | 47.3787  | 1.84E-05 | 0.000155 | 5        |   |
| 1466_at   | 1466   | ENSG000001CSR2     | cysteine and glycine-ri l   | 7                       | -1.81858 | -        |          |          |          |          |          |          |          |          |   |

|           |        |                     |                             |           |    |          |          |          |          |          |          |          |          |          |          |   |
|-----------|--------|---------------------|-----------------------------|-----------|----|----------|----------|----------|----------|----------|----------|----------|----------|----------|----------|---|
| 7071_at   | 7071   | ENSG000001KLF10     | Kruppel-like factor 10      | I         | 8  | -1.44324 | -1.52827 | -0.11196 | -0.67914 | -0.12003 | 8.610853 | 105.689  | 1.01E-06 | 2.09E-05 | 5        |   |
| 10438_at  | 10438  | ENSG000001C1D       | C1D nuclear receptor c      | I         | 9  | -1.51452 | -1.70627 | -0.29131 | -0.66544 | -0.16345 | 6.702076 | 36.67933 | 4.56E-05 | 0.000307 | 5        |   |
| 57405_at  | 57405  | NA SPC25            | SPC25, NDC80 kinetocl       | I         | 10 | -1.42928 | -1.30045 | -0.31868 | -0.75968 | -0.0712  | 8.113318 | 80.99009 | 2.66E-06 | 3.94E-05 | 5        |   |
| 10081_at  | 10081  | ENSG000001PDCD7     | programmed cell death       | I         | 8  | -1.36197 | -1.31948 | -0.34702 | -0.90757 | -0.19848 | 6.830434 | 70.13393 | 4.49E-06 | 5.60E-05 | 5        |   |
| 25907_at  | 25907  | ENSG000001TMEM158   | transmembrane protein       | I         | 11 | -1.37363 | -1.42928 | -0.38036 | -0.93564 | -0.10249 | 9.482652 | 59.8948  | 7.93E-06 | 8.35E-05 | 5        |   |
| 5872_at   | 5872   | ENSG000001RAB13     | RAB13, mt GTPase            | I         | 3  | -1.41187 | -1.09569 | -0.53873 | -0.80451 | -0.2408  | 10.01407 | 43.47683 | 2.50E-05 | 0.000195 | 5        |   |
| 27022_at  | 27022  | ENSG000001FOX03     | forkhead box D3             | NI        | 11 | -1.45046 | -1.10304 | -0.64696 | -1.00154 | -0.4274  | 3.872809 | 20.61016 | 0.000336 | 0.001471 | 5        |   |
| 7057_at   | 7057   | ENSG000001THBS1     | thrombospondin 1            | I         | 40 | -1.45332 | -0.85197 | -0.64177 | -0.8067  | -0.4058  | 9.132264 | 28.07689 | 0.000116 | 0.000634 | 5        |   |
| 114299_at | 114299 | NA PALM2            | paralemmin 2                | NI        | 22 | -1.26315 | -0.74113 | -0.68453 | -0.85491 | -0.53818 | 4.364861 | 56.86094 | 9.56E-06 | 9.59E-05 | 5        |   |
| 4086_at   | 4086   | ENSG000001SMAD1     | SMAD family Secreted        | I         | 22 | -1.30837 | -0.8342  | -0.70692 | -0.81155 | -0.5307  | 7.199322 | 58.79281 | 8.48E-06 | 8.75E-05 | 5        |   |
| 79618_at  | 79618  | ENSG000001HMB0X1    | homeobox containing         | NI        | 22 | -1.22879 | -1.09289 | -0.67048 | -0.65279 | -0.50397 | 4.088792 | 39.73238 | 3.44E-05 | 0.000248 | 5        |   |
| 81627_at  | 81627  | ENSG000001TRMT1L    | TRM1 tRNA Secreted          | I         | 43 | -1.28062 | -1.02762 | -0.62185 | -0.70855 | -0.59775 | 5.772845 | 52.36021 | 1.29E-05 | 0.000119 | 5        |   |
| 9816_at   | 9816   | ENSG000001URB2      | URB2 ribosome biogen        | NI        | 11 | -1.32418 | -0.96394 | -0.67569 | -0.70473 | -0.57435 | 4.488757 | 75.88968 | 3.37E-06 | 4.64E-05 | 5        |   |
| 23446_at  | 23446  | ENSG000001SLC44A1   | solute carrier transport    | I         | 22 | -1.13421 | -1.04485 | -0.69041 | -0.80913 | -0.60237 | 9.788191 | 65.82708 | 5.64E-06 | 6.61E-05 | 5        |   |
| 9910_at   | 9910   | ENSG000001RABGAP1L  | RAB GTPase activating       | NI        | 11 | -1.21568 | -1.03351 | -0.72493 | -0.78344 | -0.52692 | 6.276344 | 64.2007  | 6.18E-06 | 7.03E-05 | 5        |   |
| 57560_at  | 57560  | NA IFT80            | intraflagellar transport    | I         | 20 | -1.23077 | -0.93175 | -0.80712 | -0.76349 | -0.60427 | 6.414845 | 42.74141 | 2.65E-05 | 0.000204 | 5        |   |
| 60491_at  | 60491  | ENSG000001NIF3L1    | NIF3 NGG1 interacting       | I         | 18 | -1.22419 | -0.99029 | -0.80781 | -0.79955 | -0.62663 | 8.238196 | 90.28331 | 1.80E-06 | 3.01E-05 | 5        |   |
| 29980_at  | 29980  | ENSG000001DONSON    | downstream neighbor         | I         | 10 | -1.21443 | -1.33384 | -0.62841 | -0.65626 | -0.39431 | 8.715982 | 57.14612 | 9.39E-06 | 9.44E-05 | 5        |   |
| 10314_at  | 10314  | ENSG000001LANCL1    | LanC lantib G-protein c     | NI        | 54 | -1.23153 | -1.3248  | -0.73607 | -0.80391 | -0.6234  | 5.541773 | 51.38087 | 1.38E-05 | 0.000125 | 5        |   |
| 28951_at  | 28951  | ENSG000001TRIB2     | tribbles homolog 2 (Dr      | I         | 22 | -1.37389 | -1.31625 | -0.68979 | -0.80275 | -0.57751 | 7.399413 | 80.68312 | 2.70E-06 | 3.98E-05 | 5        |   |
| 339487_at | 339487 | ENSG000001ZBTB80S   | zinc finger and BTB do      | I         | 7  | -1.56876 | -1.3632  | -0.48167 | -0.79599 | -0.41165 | 9.445346 | 89.48563 | 1.85E-06 | 3.07E-05 | 5        |   |
| 8813_at   | 8813   | ENSG000001DPM1      | dolichyl-phosphate me       | I         | 9  | -1.4369  | -1.53758 | -0.54656 | -0.84308 | -0.51497 | 11.65586 | 89.14153 | 1.88E-06 | 3.09E-05 | 5        |   |
| 91147_at  | 91147  | ENSG000001TMEM67    | transmembrane protein       | NI        | 57 | -1.24909 | -1.44247 | -0.53348 | -0.74149 | -0.50036 | 3.964754 | 83.53546 | 2.38E-06 | 3.66E-05 | 5        |   |
| 57717_at  | 57717  | ENSG000001PCDH16    | protocadherin beta 16       | I         | 11 | -1.36596 | -1.32074 | -0.53996 | -0.77906 | -0.5222  | 6.400333 | 83.33349 | 2.40E-06 | 3.67E-05 | 5        |   |
| 55764_at  | 55764  | ENSG000001IFT122    | intraflagellar transport    | NI        | 9  | -1.71375 | -1.18134 | -1.02742 | -0.77633 | -0.13438 | 5.145996 | 108.1332 | 9.30E-07 | 1.99E-05 | 5        |   |
| 91947_at  | 91947  | ENSG000001ARRDC4    | arrestin domain contain     | NI        | 32 | -1.35337 | -1.14811 | -0.89399 | -0.56451 | -0.46275 | 3.841533 | 60.50877 | 7.65E-06 | 8.12E-05 | 5        |   |
| 10020_at  | 10020  | ENSG000001GNE       | glucosaminidase             | I         | 33 | -1.30322 | -1.28912 | -1.15438 | -0.57108 | -0.41099 | 4.577352 | 73.04575 | 3.87E-06 | 5.07E-05 | 5        |   |
| 114876_at | 114876 | ENSG000001OSBPL1A   | oxysterol binding protein   | I         | 22 | -1.49515 | -1.24622 | -0.87603 | -0.75962 | -0.56071 | 7.581869 | 110.9957 | 8.45E-07 | 1.88E-05 | 5        |   |
| 7083_at   | 7083   | ENSG000001TK1       | thymidine kinase            | I         | 22 | -1.48397 | -1.13103 | -1.07863 | -0.87223 | -0.52027 | 9.582734 | 70.85184 | 4.33E-06 | 5.44E-05 | 5        |   |
| 3987_at   | 3987   | ENSG000001LIMS1     | LIM and senescent cell      | I         | 60 | -1.16837 | -1.19642 | -1.0739  | -1.0512  | -0.3082  | 8.73503  | 118.1995 | 6.72E-07 | 1.60E-05 | 5        |   |
| 57018_at  | 57018  | ENSG000001CCNL1     | cyclin L1                   | Secreted  | I  | 32       | -1.14583 | -1.35859 | -0.96182 | -0.8061  | -0.39882 | 8.181877 | 94.36811 | 1.53E-06 | 2.70E-05 | 5 |
| 6259_at   | 6259   | ENSG000001RYK       | RYK receptor kinase         | I         | 6  | -1.21526 | -1.33261 | -1.00276 | -0.80048 | -0.53693 | 9.038303 | 111.4352 | 8.33E-07 | 1.86E-05 | 5        |   |
| 389136_at | 389136 | ENSG000001VGLL3     | vestigial like 3 (Drosop    | I         | 22 | -1.5171  | -1.38655 | -1.0108  | -0.95486 | -0.29423 | 4.300129 | 30.95058 | 8.28E-05 | 0.000487 | 5        |   |
| 79733_at  | 79733  | ENSG000001E2F8      | E2F transcription factor    | Secreted  | I  | 32       | -1.40446 | -1.28323 | -0.727   | -0.94516 | -0.22996 | 5.340572 | 58.88679 | 8.43E-06 | 8.72E-05 | 5 |
| 22856_at  | 22856  | ENSG000001CHSY1     | chondroitin                 | Secreted  | I  | 31       | -1.26956 | -1.26469 | -0.86502 | -0.94654 | -0.3816  | 4.32825  | 93.2523  | 1.60E-06 | 2.78E-05 | 5 |
| 1410_at   | 1410   | ENSG000001CRYAB     | crystallin, alpha B         | NI        | 11 | -0.9942  | 0.231639 | -1.69872 | -0.40012 | -0.81049 | 4.115825 | 46.22149 | 2.01E-05 | 0.000165 | 5        |   |
| 256281_at | 256281 | ENSG000001NUDT14    | nucleoside diphosphate      | NI        | 8  | -1.42807 | 0.016307 | -1.86446 | -0.78333 | -1.33377 | 5.077928 | 68.82922 | 1.16E-05 | 0.00011  | 5        |   |
| 100132288 | 1E+08  | NA TEKT4P2          | tektin 4 pseudogene 2       | NI        | 6  | -1.03825 | -0.051   | -1.34721 | -0.72019 | -1.31594 | 4.262812 | 71.36414 | 4.21E-06 | 5.37E-05 | 5        |   |
| 80153_at  | 80153  | ENSG000001EDC3      | enhancer of mRNA dec        | NI        | 22 | -0.8633  | -0.26536 | -1.11464 | -0.59211 | -0.95707 | 6.255699 | 37.25182 | 4.32E-05 | 0.000294 | 5        |   |
| 6522_at   | 6522   | ENSG000001SLC4A2    | solute carrier transport    | I         | 13 | -0.80649 | -0.47672 | -1.34151 | -0.74532 | -1.0816  | 6.370313 | 23.69811 | 0.000209 | 0.001003 | 5        |   |
| 260429_at | 260429 | ENSG000001PRSS33    | protease, serine            | I         | 11 | -2.02198 | -0.70257 | -1.48486 | -0.69695 | -1.19323 | 3.791058 | 145.9234 | 3.10E-07 | 9.71E-06 | 5        |   |
| 333_at    | 333    | ENSG000001APLP1     | amyloid beta (A4) precursor | NI        | 31 | -1.39175 | -0.7544  | -1.04503 | -0.70442 | -1.54587 | 4.471921 | 51.23762 | 1.39E-05 | 0.000125 | 5        |   |
| 2788_at   | 2788   | ENSG000001GNG7      | guanine nucleotide          | Secreted  | NI | 32       | -1.55932 | -0.76969 | -0.96585 | -0.56919 | -0.95079 | 4.363052 | 64.67945 | 2.27E-06 | 3.55E-05 | 5 |
| 92922_at  | 92922  | ENSG000001CCDC102A  | coiled-coil domain con      | NI        | 11 | -1.47051 | -0.57025 | -1.14311 | -0.68206 | -1.1895  | 5.397142 | 62.98739 | 6.62E-06 | 7.37E-05 | 5        |   |
| 150368_at | 150368 | ENSG000001FAM109B   | family with sequence s      | NI        | 22 | -1.47128 | -0.75264 | -1.48258 | -0.78824 | -0.98199 | 4.541599 | 42.33363 | 2.74E-05 | 0.000209 | 5        |   |
| 441161_at | 441161 | ENSG000001OOP1      | oocyte expressed protein    | NI        | 7  | -1.48515 | -0.71911 | -1.3999  | -0.90846 | -0.96757 | 4.009748 | 35.79394 | 4.97E-05 | 0.000328 | 5        |   |
| 29926_at  | 29926  | ENSG000001GMPPA     | GDP-mannose pyrophosph      | I         | 18 | -1.44766 | -0.81105 | -1.24794 | -0.67715 | -1.21956 | 6.209969 | 94.60582 | 1.51E-06 | 2.68E-05 | 5        |   |
| 2134_at   | 2134   | ENSG000001EXTL1     | exostosin                   | Secreted  | NI | 10       | -1.6036  | -0.85168 | -1.36867 | -0.70574 | -1.21095 | 4.399873 | 46.01008 | 2.04E-05 | 0.000166 | 5 |
| 255324_at | 255324 | ENSG000001EPGN      | epithelial sodium kinase    | I         | 57 | -0.29391 | -0.49683 | -0.33541 | -0.97679 | -1.73345 | 3.743416 | 44.46287 | 2.31E-05 | 0.000182 | 5        |   |
| 1437_at   | 1437   | ENSG000001CSF2      | colony stimulating factor   | Secreted  | I  | 11       | -0.61875 | -0.42058 | -0.29688 | -1.26278 | -1.48739 | 8.428589 | 24.90258 | 0.000176 | 0.000875 | 5 |
| 10522_at  | 10522  | ENSG000001DEAF1     | deformed                    | Secreted  | I  | 11       | -0.32804 | -0.21748 | -0.29279 | -0.6005  | -1.04996 | 7.687608 | 26.82428 | 0.000136 | 0.000716 | 5 |
| 23643_at  | 23643  | ENSG000001LY96      | lymphocyte                  | Secreted  | I  | 9        | -0.43931 | -0.35876 | -0.26381 | -0.60613 | -1.12507 | 6.942696 | 20.98083 | 0.000316 | 0.001399 | 5 |
| 388389_at | 388389 | ENSG000001CCDC103   | coiled-coil domain con      | NI        | 11 | -0.61986 | -0.1943  | -0.38249 | -0.67137 | -1.08442 | 3.748872 | 14.42898 | 0.001101 | 0.003903 | 5        |   |
| 5600_at   | 5600   | ENSG000001MAPK11    | mitogen-activated kinase    | NI        | 18 | -0.47109 | -0.38758 | -0.50057 | -0.66453 | -1.21148 | 3.89604  | 25.15842 | 0.00017  | 0.000851 | 5        |   |
| 51061_at  | 51061  | ENSG000001TXNDC11   | thioredoxin domain con      | NI        | 11 | -0.5736  | -0.29498 | -0.50933 | -0.72887 | -1.14039 | 6.13805  | 21.63846 | 0.000285 | 0.001286 | 5        |   |
| 8535_at   | 8535   | ENSG000001CBX4      | chromobox homolog 4         | NI        | 22 | -0.46369 | -0.58253 | -0.4121  | -0.54927 | -1.00201 | 3.920556 | 30.85841 | 8.36E-05 | 0.00049  | 5        |   |
| 726_at    | 726    | ENSG000001CAPN5     | calpain 5                   | peptidase | NI | 21       | -0.63935 | -0.45475 | -0.4498  | -0.47574 | -1.0373  | 5.040113 | 14.74423 | 0.001026 | 0.003685 | 5 |
| 4982_at   | 4982   | ENSG000001TNFRSF11E | tumor necrosis factor       | Secreted  | NI | 11       | -0.68393 | -0.48588 | -0.22607 | -0.40196 | -1.05671 | 6.521319 | 27.54245 | 0.000124 | 0.000668 | 5 |
| 5580_at   | 5580   | ENSG000001PRKDC     | protein kinase              | NI        | 21 | -0.66645 | -0.71855 | -0.30796 | -0.41838 | -1.15235 | 6.886818 | 35.98576 | 4.88E-05 | 0.000323 | 5        |   |
| 91300_at  | 91300  | ENSG000001C19orf22  | chromosome 19 open          | NI        | 31 | -0.38859 | -0.65775 | -0.4006  | -0.35677 | -1.16812 | 6.270547 | 21.46075 | 0.000293 | 0.001314 | 5        |   |
| 3489_at   | 3489   | ENSG000001IGFBP6    | insulin-like growth factor  | Secreted  | I  | 10       | -0.40375 | -0.73487 | -0.29299 | -0.65518 | -1.11449 | 8.382042 | 27.96354 | 0.000118 | 0.000641 | 5 |
| 5973_at   | 5973   | ENSG000001RENBP     | renin binding protein       | NI        | 11 | -0.48159 | -0.59471 | -0.40683 | -0.64005 | -1.35152 | 3.673136 | 29.30469 | 0.0001   | 0.000566 | 5        |   |
| 6242_at   | 6242   | ENSG000001RTKN      | rhodokinase                 | NI        | 33 | -0.43472 | -0.70074 | -0.59057 | -0.67491 | -1.34024 | 4.93218  | 41.90553 | 2.85E-05 | 0.000215 | 5        |   |
| 113655_at | 113655 | ENSG000001MFSD3     | major facilitator super     | NI        | 9  | -0.35242 | -0.86493 | -0.9835  | -0.53482 | -1.33677 | 5.885299 | 37.9334  | 4.05E-05 | 0.00028  | 5        |   |
| 285613_at | 285613 | ENSG000001RELL2     | REL-like 2                  | NI        | 14 | -0.34538 | -0.6841  | -0.6965  | -0.49066 | -1.1624  | 5.190724 | 14.73165 | 0.001029 | 0.003693 | 5        |   |
| 29952_at  | 29952  | ENSG000001DPP7      | dipeptidyl-peptidase        | NI        | 31 | -0.44171 | -0.82769 | -0.69391 | -0.40692 | -1.02372 | 6.6869   | 50.8769  | 1.43E-05 | 0.000128 | 5        |   |
| 55687_at  | 55687  | ENSG000001TRMU      | tRNA 5-methylaminon         | NI        | 35 | -0.22756 | -0.17104 | -0.78732 | -0.55063 | -1.01229 | 6.664776 | 34.10471 | 5.89E-05 | 0.000374 | 5        |   |
| 57140_at  | 57140  | ENSG000001RNPEPL1   | arginyl aminopeptidase      | NI        | 11 | -0.45446 | -0.34311 | -0.73202 | -0.438   |          |          |          |          |          |          |   |

|           |        |                      |                             |    |          |          |          |          |          |          |          |          |          |   |
|-----------|--------|----------------------|-----------------------------|----|----------|----------|----------|----------|----------|----------|----------|----------|----------|---|
| 23464_at  | 23464  | ENSG000001 GCAT      | glycine C-acetyltransfe NI  | 7  | -0.17121 | -0.94872 | -0.85307 | -0.9084  | -1.30124 | 6.614077 | 39.97134 | 3.36E-05 | 0.000244 | 5 |
| 190_at    | 190    | ENSG000001 NR0B1     | nuclear rec nuclear rec NI  | 21 | -0.324   | -0.48779 | -0.72394 | -1.16909 | -1.28396 | 3.738201 | 27.82463 | 0.00012  | 0.00065  | 5 |
| 1608_at   | 1608   | ENSG000001 DGKG      | diacylglycine kinase I      | 41 | -0.53865 | -0.61807 | -0.56858 | -1.17346 | -1.39966 | 3.860314 | 55.73921 | 1.03E-05 | 0.000101 | 5 |
| 401647_at | 401647 | ENSG000001 GOLGA7B   | golgin A7 family, mem NI    | 11 | -0.57339 | -0.70605 | -0.86472 | -1.17925 | -1.4233  | 4.02221  | 130.2169 | 4.71E-07 | 1.28E-05 | 5 |
| 284114_at | 284114 | ENSG000001 TMEM102   | transmembrane protei I      | 11 | -0.45022 | -1.12757 | -1.31327 | -0.97724 | -1.5145  | 5.497043 | 54.43836 | 1.12E-05 | 0.000107 | 5 |
| 92399_at  | 92399  | ENSG000001 MRRF      | mitochondrial ribosom I     | 11 | -0.41054 | -1.06162 | -0.94595 | -0.94126 | -1.17744 | 6.984151 | 30.78956 | 8.43E-05 | 0.000493 | 5 |
| 9610_at   | 9610   | ENSG000001 RIN1      | Ras and Rab interactor NI   | 56 | -0.58423 | -1.14325 | -0.89278 | -0.95034 | -1.10125 | 5.067623 | 102.9078 | 1.11E-06 | 2.22E-05 | 5 |
| 115399_at | 115399 | ENSG000001 LRRC56    | leucine rich repeat con NI  | 11 | -0.70578 | -1.08669 | -0.70131 | -1.07252 | -1.40343 | 5.374858 | 30.67269 | 8.54E-05 | 0.000498 | 5 |
| 2184_at   | 2184   | ENSG000001 FAH       | fumarylacetoacetate h I     | 9  | -0.69925 | -0.96034 | -0.81584 | -0.95941 | -1.23971 | 9.03795  | 44.79988 | 2.24E-05 | 0.000179 | 5 |
| 5799_at   | 5799   | ENSG000001 PTPRN2    | protein tyrin phosphopr I   | 30 | -0.73174 | -1.0324  | -0.83861 | -1.08766 | -1.24119 | 4.133896 | 128.4718 | 4.95E-07 | 1.31E-05 | 5 |
| 23500_at  | 23500  | ENSG000001 DAAM2     | dishevelled associated NI   | 20 | -0.74597 | -0.88983 | -1.11285 | -0.85616 | -1.32762 | 4.924407 | 121.6989 | 6.04E-07 | 1.50E-05 | 5 |
| 401093_at | 401093 | NA LOC401093         | hypothetical LOC4010 NI     | 11 | -0.74986 | -0.90846 | -0.95862 | -0.87845 | -1.23048 | 4.390651 | 53.74288 | 1.17E-05 | 0.000111 | 5 |
| 409_at    | 409    | ENSG000001 ARRB2     | arrestin, beta 2 NI         | 27 | -0.85228 | -0.87325 | -1.07231 | -0.81963 | -1.21177 | 4.965617 | 24.00977 | 0.0002   | 0.000967 | 5 |
| 10073_at  | 10073  | ENSG000001 SNUPN     | snurportin transporte I     | 11 | -0.92328 | -0.86988 | -0.9985  | -0.86769 | -1.23862 | 8.479508 | 78.29382 | 3.01E-06 | 4.29E-05 | 5 |
| 79701_at  | 79701  | ENSG000001 C17orf101 | chromosome 17 open I        | 19 | -0.89429 | -0.89761 | -0.9743  | -0.93848 | -1.41276 | 6.833308 | 71.50713 | 4.18E-06 | 5.35E-05 | 5 |
| 117144_at | 117144 | ENSG000001 CATSPER1  | cation char ion channe I    | 10 | -0.92114 | -0.91589 | -1.00416 | -1.09821 | -1.30971 | 6.185132 | 33.22312 | 6.46E-05 | 0.000401 | 5 |
| 5045_at   | 5045   | ENSG000001 FURIN     | furin (paire peptidase NI   | 11 | -0.78634 | -0.96989 | -1.1075  | -1.01515 | -1.19775 | 6.084828 | 20.24061 | 0.000357 | 0.001545 | 5 |
| 23704_at  | 23704  | ENSG000001 KCNE4     | potassium ion channe NI     | 22 | -0.85633 | -1.00179 | -0.95579 | -1.01786 | -1.16444 | 4.093693 | 102.891  | 1.12E-06 | 2.22E-05 | 5 |
| 54751_at  | 54751  | ENSG000001 FBLIM1    | filamin binding LIM prc I   | 33 | -0.81519 | -1.06771 | -1.06265 | -0.98867 | -1.24586 | 6.940545 | 104.5226 | 1.05E-06 | 2.14E-05 | 5 |
| 706_at    | 706    | ENSG000001 TSPO      | translocato Secreted I      | 32 | -0.89802 | -1.07348 | -1.059   | -0.99774 | -1.20398 | 11.66759 | 97.55332 | 1.35E-06 | 2.48E-05 | 5 |
| 51524_at  | 51524  | ENSG000001 TMEM138   | transmembrane protei I      | 11 | -0.53715 | -0.75499 | -1.17947 | -0.92898 | -0.98156 | 8.664592 | 73.42854 | 3.80E-06 | 5.00E-05 | 5 |
| 83986_at  | 83986  | ENSG000001 ITFG3     | integrin alpha FG-GAP I     | 11 | -0.57929 | -0.58773 | -1.15843 | -0.80412 | -0.98374 | 7.108226 | 41.20502 | 3.02E-05 | 0.000225 | 5 |
| 148304_at | 148304 | ENSG000001 C1orf74   | chromosome 1 open ri NI     | 11 | -0.65691 | -0.69299 | -1.16111 | -0.77659 | -0.93244 | 4.928188 | 49.76098 | 1.54E-05 | 0.000136 | 5 |
| 6721_at   | 6721   | ENSG000001 SREBF2    | sterol regulatory elemi I   | 20 | -0.53982 | -0.52779 | -1.06156 | -0.89771 | -0.91964 | 5.531633 | 27.40015 | 0.000127 | 0.000677 | 5 |
| 60386_at  | 60386  | ENSG000001 SLC25A19  | solute carri transporte I   | 21 | -0.55783 | -0.64736 | -1.0536  | -0.88502 | -0.87969 | 7.104227 | 48.0853  | 1.74E-05 | 0.00015  | 5 |
| 85474_at  | 85474  | ENSG000001 LXB2      | ladybird homeobox 2 NI      | 22 | -0.43504 | -0.61173 | -1.22978 | -0.88716 | -0.7691  | 4.534592 | 65.49436 | 5.75E-06 | 6.69E-05 | 5 |
| 10300_at  | 10300  | ENSG000001 KATNB1    | katanin p80 (WD repe: NI    | 16 | -0.45822 | -0.54705 | -1.1911  | -0.98311 | -0.92902 | 5.399089 | 67.69265 | 5.10E-06 | 6.13E-05 | 5 |
| 64236_at  | 64236  | ENSG000001 PDLIM2    | PDZ and LIM domain 2 I      | 21 | -0.70262 | -0.5485  | -1.2592  | -0.9225  | -0.71127 | 3.734062 | 67.37779 | 5.19E-06 | 6.20E-05 | 5 |
| 51172_at  | 51172  | ENSG000001 NAGPA     | N-acetylglu Secreted NI     | 11 | -0.74264 | -0.40194 | -1.27982 | -0.90541 | -0.85272 | 5.843924 | 19.23601 | 0.000424 | 0.001783 | 5 |
| 283687_at | 283687 | NA C15orf37          | chromosome 15 open NI       | 20 | -1.05537 | -0.49788 | -1.26958 | -0.80523 | -0.74647 | 3.727433 | 33.37069 | 6.36E-05 | 0.000397 | 5 |
| 25966_at  | 25966  | ENSG000001 C2CD2     | C2 calcium-dependent I      | 22 | -1.05745 | -0.52223 | -1.25611 | -0.7912  | -0.83514 | 6.193469 | 44.50996 | 2.30E-05 | 0.000182 | 5 |
| 64425_at  | 64425  | ENSG000001 POLR1E    | polymerase (RNA) I po I     | 32 | -0.92373 | -0.8404  | -1.21991 | -0.98266 | -0.72946 | 8.69093  | 77.73355 | 3.09E-06 | 4.36E-05 | 5 |
| 9289_at   | 9289   | ENSG000001 GPR56     | G protein-c G-protein c I   | 33 | -0.98272 | -0.82417 | -1.33339 | -0.87853 | -0.78939 | 5.287239 | 76.67736 | 3.25E-06 | 4.51E-05 | 5 |
| 649_at    | 649    | ENSG000001 BMP1      | bone morp peptidase NI      | 42 | -0.74775 | -0.93355 | -1.35246 | -0.89725 | -0.68632 | 4.465146 | 54.73279 | 1.10E-05 | 0.000106 | 5 |
| 9631_at   | 9631   | ENSG000001 NUP155    | nucleoporin Secreted I      | 9  | -0.78519 | -0.70584 | -1.22723 | -0.90309 | -0.63466 | 7.841668 | 47.12211 | 1.87E-05 | 0.000157 | 5 |
| 29886_at  | 29886  | ENSG000001 SNX8      | sorting nexin 8 I           | 8  | -0.85156 | -0.82786 | -1.21481 | -0.88767 | -0.58743 | 6.708552 | 28.48274 | 0.000111 | 0.00061  | 5 |
| 23350_at  | 23350  | ENSG000001 UZSURP    | UZ snRNP-associated S I     | 29 | -0.53963 | -0.94966 | -0.88229 | -1.01157 | -0.5017  | 7.821313 | 46.46149 | 1.97E-05 | 0.000162 | 5 |
| 9648_at   | 9648   | ENSG000001 GCC2      | GRIP and coiled-coil dc I   | 43 | -0.72778 | -0.8782  | -1.10451 | -1.02944 | -0.50538 | 7.581101 | 89.95714 | 1.82E-06 | 3.03E-05 | 5 |
| 9392_at   | 9392   | ENSG000001 TGFBRAP1  | transforming growth fr: NI  | 11 | -0.65555 | -0.83791 | -1.12931 | -1.23065 | -0.76371 | 4.742621 | 45.61132 | 2.11E-05 | 0.000171 | 5 |
| 10082_at  | 10082  | ENSG000001 GPC6      | glypican 6 Secreted NI      | 32 | -0.65609 | -0.71541 | -0.897   | -1.08891 | -0.66305 | 4.829645 | 19.37493 | 0.000414 | 0.001744 | 5 |
| 286128_at | 286128 | ENSG000001 ZFP41     | zinc finger protein 41 f NI | 8  | -0.5156  | -0.62897 | -1.05159 | -1.24476 | -0.65783 | 5.382577 | 15.305   | 0.000908 | 0.003326 | 5 |
| 56257_at  | 56257  | ENSG000001 MEPCE     | methylphosphate cap: I      | 11 | -0.6338  | -0.94085 | -1.0343  | -0.54325 | -0.42396 | 7.845527 | 50.82089 | 1.43E-05 | 0.000128 | 5 |
| 11342_at  | 11342  | ENSG000001 RNF13     | ring finger protein 13 I    | 10 | -0.76032 | -0.7979  | -1.07699 | -0.53699 | -0.62891 | 8.52809  | 45.08935 | 2.19E-05 | 0.000177 | 5 |
| 25871_at  | 25871  | ENSG000001 C3orf17   | chromosome 3 open ri NI     | 72 | -0.85924 | -0.82834 | -1.01349 | -0.55783 | -0.56097 | 6.608603 | 45.63557 | 2.10E-05 | 0.000171 | 5 |
| 79640_at  | 79640  | ENSG000001 C22orf46  | chromosome 22 open NI       | 11 | -0.77179 | -0.60323 | -1.21726 | -0.67976 | -0.61448 | 5.219308 | 61.26525 | 7.31E-06 | 7.89E-05 | 5 |
| 64753_at  | 64753  | ENSG000001 CCDC136   | coiled-coil domain con NI   | 11 | -0.81171 | -0.54606 | -1.02118 | -0.67664 | -0.44408 | 4.006131 | 30.4478  | 8.77E-05 | 0.000509 | 5 |
| 91523_at  | 91523  | ENSG000001 FAM113B   | family with sequence s NI   | 11 | -0.7987  | -0.53329 | -1.17161 | -0.79792 | -0.47866 | 4.677467 | 61.22523 | 7.33E-06 | 7.90E-05 | 5 |
| 64601_at  | 64601  | ENSG000001 VPS16     | vacuolar protein sortin I   | 6  | -0.7739  | -0.64876 | -1.02234 | -0.64548 | -0.8348  | 7.843348 | 29.68685 | 9.57E-05 | 0.000546 | 5 |
| 51335_at  | 51335  | ENSG000001 NGRN      | neugrin, neurite outgr: I   | 10 | -0.74543 | -0.74605 | -1.05192 | -0.72977 | -0.79756 | 10.77109 | 58.21576 | 8.79E-06 | 8.99E-05 | 5 |
| 79621_at  | 79621  | ENSG000001 RNA5EH2B  | ribonuclease H2, subu: I    | 19 | -0.85945 | -0.6928  | -1.07565 | -0.69459 | -0.64334 | 7.642383 | 58.55769 | 8.60E-06 | 8.84E-05 | 5 |
| 55174_at  | 55174  | ENSG000001 INTS10    | integrator complex sul I    | 20 | -0.91279 | -0.77908 | -1.00287 | -0.72597 | -0.73879 | 8.442997 | 61.722   | 7.12E-06 | 7.75E-05 | 5 |
| 80228_at  | 80228  | ENSG000001 ORAI2     | ORAI calcium release-c NI   | 44 | -0.56239 | -0.72151 | -1.05177 | -0.7794  | -0.56322 | 4.233468 | 25.66976 | 0.000159 | 0.000804 | 5 |
| 221458_at | 221458 | ENSG000001 KIF6      | kinesin family member NI    | 32 | -0.58899 | -0.85104 | -1.04544 | -0.89962 | -0.56403 | 3.948849 | 27.42508 | 0.000126 | 0.000677 | 5 |
| 7791_at   | 7791   | ENSG000001 ZYX       | zyxin NI                    | 22 | -0.62245 | -0.75751 | -1.03611 | -0.87457 | -0.85363 | 6.009897 | 42.57838 | 2.69E-05 | 0.000206 | 5 |
| 5433_at   | 5433   | ENSG000001 POLR2D    | polymerase (RNA) II (D I    | 19 | -0.49016 | -0.82286 | -1.09599 | -0.92954 | -0.81305 | 6.682521 | 87.94564 | 1.98E-06 | 3.21E-05 | 5 |
| 130612_at | 130612 | ENSG000001 TMEM198   | transmembrane protei NI     | 11 | -0.47144 | -1.09177 | -1.07086 | -0.79245 | -0.59374 | 4.707951 | 53.75028 | 1.17E-05 | 0.000111 | 5 |
| 79690_at  | 79690  | ENSG000001 GAL3ST4   | galactose-3 Secreted NI     | 22 | -0.65127 | -0.8947  | -1.04288 | -0.85439 | -0.74055 | 4.167955 | 45.83438 | 2.07E-05 | 0.000169 | 5 |
| 18086_at  | 18086  | ENSG000001 SDCCAG8   | serologically defined c: I  | 20 | -0.71617 | -0.98689 | -1.01125 | -0.89928 | -0.74888 | 6.089269 | 21.14865 | 0.000308 | 0.001371 | 5 |
| 1879_at   | 1879   | ENSG000001 EBF1      | early B-cell factor 1 NI    | 31 | -0.59846 | -1.01534 | -0.79817 | -0.8866  | -0.71636 | 3.833217 | 27.54373 | 0.000124 | 0.000668 | 5 |
| 64921_at  | 64921  | ENSG000001 CASD1     | CAS1 domain containir NI    | 19 | -0.63345 | -1.01586 | -0.83983 | -0.80079 | -0.58845 | 5.443747 | 43.11622 | 2.57E-05 | 0.000199 | 5 |
| 9276_at   | 9276   | ENSG000001 COPB2     | coatome protein com I       | 21 | -0.69146 | -1.05507 | -0.82296 | -0.77163 | -0.68777 | 7.048115 | 48.65528 | 1.67E-05 | 0.000145 | 5 |
| 27122_at  | 27122  | ENSG000001 DKK3      | dickkopf hc Secreted NI     | 44 | -0.53322 | -0.56341 | -1.26607 | -0.75447 | -1.27874 | 4.452826 | 31.2372  | 8.02E-05 | 0.000475 | 5 |
| 3215_at   | 3215   | ENSG000001 HOXB5     | homeobox B5 NI              | 25 | -0.59922 | -0.56348 | -1.12537 | -0.70372 | -1.0941  | 4.119898 | 83.37077 | 2.40E-06 | 3.67E-05 | 5 |
| 393_at    | 393    | ENSG000001 ARHGAP4   | Rho GTPase activating NI    | 42 | -0.58949 | -0.66686 | -1.16283 | -0.61658 | -1.19188 | 4.550444 | 44.53399 | 2.29E-05 | 0.000182 | 5 |
| 91373_at  | 91373  | ENSG000001 UAP1L1    | UDP-N-acetylglucosam: NI    | 11 | -0.84204 | -0.81271 | -1.31677 | -0.56823 | -1.37681 | 5.449448 | 71.0864  | 4.29E-06 | 5.42E-05 | 5 |
| 9159_at   | 9159   | ENSG000001 PCSK7     | proprote in peptidase NI    | 11 | -0.71005 | -0.84292 | -1.22121 | -0.58769 | -1.03132 | 6.593547 | 33.09795 | 6.55E-05 | 0.000405 | 5 |
| 6988_at   | 6988   | ENSG000001 TCTA      | T-cell leukemia translo I   | 21 | -0.66867 | -0.98033 | -1.30021 | -0.79513 | -1.09382 | 6.740424 | 94.54284 | 1.52E-06 | 2.68E-05 | 5 |
| 29927_at  | 29927  | ENSG000001 SEC61A1   | Sec61 alph. transporte I    | 32 | -0.84536 | -0.85494 | -1.24593 | -0.74659 | -1.16439 | 7.811203 | 72.69105 | 3.94E-06 | 5.13E-05 | 5 |
| 6296_at   | 6296   | ENSG000001 ACSM3     | acyl-CoA synthetase m NI    | 16 | -0.8811  | -0.64439 | -0.90571 | -1.16427 | -1.08247 | 4.056203 | 39.95481 | 3.37E-05 | 0.000244 | 5 |
| 64708_at  | 64708  | ENSG000001 COP57B    | COP9 constitutive pho: I    | 11 |          |          |          |          |          |          |          |          |          |   |

|           |        |                    |                          |                        |    |          |          |          |          |          |          |          |          |          |          |   |
|-----------|--------|--------------------|--------------------------|------------------------|----|----------|----------|----------|----------|----------|----------|----------|----------|----------|----------|---|
| 9900_at   | 9900   | ENSG000001SV2A     | synaptic ve transporte   | NI                     | 27 | -0.68749 | -0.99009 | -1.00897 | -0.66439 | -1.15977 | 3.927324 | 86.20475 | 2.12E-06 | 3.39E-05 | 5        |   |
| 8733_at   | 8733   | NA                 | GPA                      | glycosylphosphatidyl   | I  | 14       | -0.59009 | -0.98188 | -0.92075 | -0.79281 | -1.26948 | 6.833783 | 59.32561 | 8.21E-06 | 8.54E-05 | 5 |
| 8818_at   | 8818   | ENSG000001DPM2     | dolichyl-phosphate m     | I                      | 11 | -0.75955 | -0.59517 | -0.91944 | -0.87857 | -1.03547 | 8.929383 | 60.92643 | 7.46E-06 | 7.99E-05 | 5        |   |
| 138428_at | 138428 | ENSG000001PTRH1    | peptidyl-tRNA hydrola    | I                      | 11 | -0.63751 | -0.72792 | -0.8927  | -0.8806  | -1.10005 | 7.961932 | 20.17742 | 0.000361 | 0.001559 | 5        |   |
| 2114_at   | 2114   | ENSG000001ETS2     | v-ets erythroblastosis   | I                      | 21 | -0.65291 | -0.6304  | -0.93416 | -0.97773 | -1.09279 | 7.665797 | 20.71651 | 0.00033  | 0.001451 | 5        |   |
| 90196_at  | 90196  | NA                 | SYS1                     | SYS1 Golgi-localized   | I  | 22       | -0.63243 | -0.7297  | -0.6816  | -0.74854 | -1.01848 | 6.561832 | 57.37178 | 9.26E-06 | 9.33E-05 | 5 |
| 59271_at  | 59271  | ENSG000001C21orf63 | chromosome 21 open       | NI                     | 19 | -0.61251 | -0.6609  | -0.77527 | -0.74439 | -1.0767  | 6.043845 | 49.25032 | 1.60E-05 | 0.00014  | 5        |   |
| 85014_at  | 85014  | ENSG000001TMEM141  | transmembrane protei     | I                      | 6  | -0.63489 | -0.82251 | -0.74129 | -0.84125 | -1.01804 | 8.296127 | 58.62525 | 8.57E-06 | 8.82E-05 | 5        |   |
| 23170_at  | 23170  | ENSG000001TTLL12   | tubulin tyrosine ligase  | I                      | 26 | -0.69696 | -0.81547 | -0.79745 | -0.86706 | -1.07592 | 6.117139 | 91.54037 | 1.71E-06 | 2.91E-05 | 5        |   |
| 64320_at  | 64320  | ENSG000001RNF25    | ring finger protein 25   | I                      | 11 | -0.68096 | -0.82916 | -0.87064 | -0.8426  | -1.10423 | 6.934563 | 63.72138 | 6.35E-06 | 7.17E-05 | 5        |   |
| 51650_at  | 51650  | ENSG000001MRPS33   | mitochondrial ribosom    | I                      | 11 | -0.7411  | -0.81632 | -0.90663 | -0.6961  | -1.01395 | 9.558601 | 55.65283 | 1.03E-05 | 0.000101 | 5        |   |
| 51078_at  | 51078  | ENSG000001THAP4    | THAP domain containi     | I                      | 10 | -0.71546 | -0.68813 | -0.9815  | -0.74238 | -1.09831 | 9.291738 | 59.371   | 8.19E-06 | 8.53E-05 | 5        |   |
| 23192_at  | 23192  | ENSG000001ATG4B    | ATG4 autolysosomal       | NI                     | 55 | -0.78239 | -0.62687 | -0.75488 | -0.69105 | -1.04961 | 6.490013 | 39.2895  | 3.58E-05 | 0.000255 | 5        |   |
| 84836_at  | 84836  | ENSG000001ABHD14B  | abhydrolase domain c     | NI                     | 21 | -0.84161 | -0.66122 | -0.80774 | -0.77633 | -1.02212 | 5.117567 | 44.82765 | 2.24E-05 | 0.000179 | 5        |   |
| 2987_at   | 2987   | ENSG000001GUK1     | guanylate k              | I                      | 48 | -0.7405  | -0.68107 | -0.82703 | -0.80827 | -1.05571 | 10.2303  | 65.60281 | 5.71E-06 | 6.67E-05 | 5        |   |
| 513_at    | 513    | ENSG000001ATP5D    | ATP synthase             | I                      | 32 | -0.74821 | -0.6414  | -0.78803 | -0.75137 | -1.08522 | 9.701341 | 70.72626 | 4.35E-06 | 5.47E-05 | 5        |   |
| 977_at    | 977    | ENSG000001CD151    | CD151 molecule (Raph     | I                      | 54 | -0.77227 | -0.65672 | -0.82067 | -0.73852 | -1.03266 | 8.990844 | 57.55737 | 9.15E-06 | 9.27E-05 | 5        |   |
| 11068_at  | 11068  | ENSG000001CYB561D2 | cytochrome b-561 don     | I                      | 11 | -0.65908 | -0.87132 | -1.01367 | -1.08241 | -1.10536 | 8.327768 | 81.88148 | 2.56E-06 | 3.83E-05 | 5        |   |
| 10195_at  | 10195  | ENSG000001ALG3     | asparagine-linked glyco  | I                      | 16 | -0.5858  | -0.82935 | -1.21629 | -1.08815 | -1.14426 | 8.205745 | 91.80442 | 1.69E-06 | 2.89E-05 | 5        |   |
| 55657_at  | 55657  | ENSG000001ZNF692   | zinc finger protein 692  | I                      | 30 | -0.81374 | -0.87761 | -1.37032 | -0.93591 | -1.03163 | 6.657397 | 63.70861 | 6.35E-06 | 7.17E-05 | 5        |   |
| 471_at    | 471    | ENSG000001ATIC     | 5-aminimidazole-4-car    | I                      | 9  | -0.75368 | -0.93625 | -1.20262 | -0.93744 | -0.9268  | 9.842524 | 87.07409 | 2.05E-06 | 3.30E-05 | 5        |   |
| 57168_at  | 57168  | ENSG000001ASPHD2   | aspartate beta-hydrox    | NI                     | 22 | -0.87001 | -0.90428 | -1.25513 | -0.89525 | -0.9009  | 5.436134 | 44.49414 | 2.30E-05 | 0.000182 | 5        |   |
| 26001_at  | 26001  | ENSG000001RNF167   | ring finger protein 167  | I                      | 31 | -0.86806 | -0.94554 | -1.27314 | -1.05656 | -1.04124 | 6.763863 | 101.3495 | 1.18E-06 | 2.29E-05 | 5        |   |
| 157697_at | 157697 | ENSG000001ERIC1    | glutamate-rich 1         | I                      | 39 | -0.84817 | -0.93922 | -1.25901 | -1.13148 | -1.07515 | 7.595773 | 91.49916 | 1.71E-06 | 2.91E-05 | 5        |   |
| 23378_at  | 23378  | ENSG000001RRP8     | ribosomal RNA proces     | I                      | 19 | -0.75014 | -0.84118 | -1.23263 | -1.05546 | -1.16957 | 6.222907 | 50.4863  | 1.46E-05 | 0.00013  | 5        |   |
| 171568_at | 171568 | ENSG000001POLR3H   | polymerase (RNA) III     | I                      | 38 | -0.76218 | -0.92779 | -1.13501 | -1.05431 | -1.10258 | 6.814024 | 88.21825 | 1.95E-06 | 3.18E-05 | 5        |   |
| 79587_at  | 79587  | ENSG000001CAR52    | cysteiny                 | I                      | 15 | -0.76799 | -0.88542 | -1.15592 | -1.1198  | -1.07276 | 6.839421 | 19.85023 | 0.000381 | 0.001634 | 5        |   |
| 113_at    | 113    | ENSG000001ADCY7    | adenylate cyclase 7      | NI                     | 31 | -0.72264 | -1.0907  | -0.91924 | -1.07786 | -1.00198 | 5.416587 | 33.31109 | 6.39E-05 | 0.000397 | 5        |   |
| 55798_at  | 55798  | ENSG000001METTL2B  | methyltransferase like   | I                      | 18 | -0.79742 | -1.03432 | -1.00972 | -1.14796 | -1.04891 | 6.778383 | 131.6201 | 4.53E-07 | 1.24E-05 | 5        |   |
| 9467_at   | 9467   | ENSG000001SH3BP5   | SH3-domain binding p     | I                      | 22 | -0.64719 | -1.15062 | -1.1556  | -1.15758 | -0.95682 | 7.685579 | 118.8877 | 6.58E-07 | 1.58E-05 | 5        |   |
| 2055_at   | 2055   | ENSG000001CLN8     | ceroid-lipofuscinosis,   | NI                     | 43 | -0.63566 | -1.07042 | -1.07266 | -1.04309 | -1.10031 | 5.233085 | 92.54362 | 1.64E-06 | 2.84E-05 | 5        |   |
| 10642_at  | 10642  | ENSG000001IGF2BP1  | insulin-like growth fac  | NI                     | 25 | -0.7229  | -1.05948 | -1.17086 | -1.03688 | -1.06605 | 4.277338 | 38.32346 | 3.91E-05 | 0.000273 | 5        |   |
| 55756_at  | 55756  | ENSG000001INTS9    | integrator complex su    | I                      | 32 | -0.79023 | -1.08009 | -1.03265 | -0.83413 | -1.12514 | 5.722232 | 68.68244 | 4.84E-06 | 5.90E-05 | 5        |   |
| 219_at    | 219    | ENSG000001ALDH1B1  | aldehyde dehydrogen      | I                      | 22 | -0.79261 | -1.15904 | -1.16948 | -0.81775 | -1.01019 | 6.29375  | 89.0396  | 1.89E-06 | 3.10E-05 | 5        |   |
| 64792_at  | 64792  | ENSG000001RABL5    | RAB, member RAS onc      | I                      | 55 | -0.84794 | -0.99108 | -1.11286 | -0.96816 | -1.00611 | 7.042801 | 74.09672 | 3.68E-06 | 4.90E-05 | 5        |   |
| 256355_at | 256355 | NA                 | RPS2P32                  | ribosomal protein S2 p | I  | 22       | -0.8256  | -0.93929 | -1.1252  | -0.91747 | -1.08835 | 5.202048 | 84.00307 | 2.33E-06 | 3.63E-05 | 5 |
| 25894_at  | 25894  | ENSG000001PLEKHG4  | pleckstrin homology d    | I                      | 11 | -0.73217 | -0.97201 | -1.08552 | -0.89225 | -1.07436 | 6.940025 | 83.3815  | 2.40E-06 | 3.67E-05 | 5        |   |
| 374875_at | 374875 | ENSG000001HSD11B1L | hydroxysteroid           | NI                     | 20 | -0.76018 | -1.0149  | -1.15409 | -0.90979 | -1.05054 | 4.808079 | 56.23072 | 9.95E-06 | 9.85E-05 | 5        |   |
| 84942_at  | 84942  | ENSG000001WDR73    | WD repeat domain 73      | I                      | 21 | -0.62801 | -1.03942 | -0.9164  | -0.92347 | -0.88819 | 6.057179 | 99.4969  | 1.26E-06 | 2.38E-05 | 5        |   |
| 2274_at   | 2274   | ENSG000001FHL2     | four and a half LIM do   | I                      | 33 | -0.74452 | -1.00792 | -0.87385 | -0.92067 | -0.88408 | 9.594278 | 100.6142 | 1.21E-06 | 2.33E-05 | 5        |   |
| 53944_at  | 53944  | ENSG000001CSNK1G1  | casein kinase            | NI                     | 42 | -0.79311 | -1.05171 | -0.89243 | -0.88661 | -0.82157 | 5.097475 | 68.87734 | 4.79E-06 | 5.86E-05 | 5        |   |
| 8607_at   | 8607   | ENSG000001RUVBL1   | RuvB-like 1 (E. coli)    | I                      | 30 | -0.82693 | -0.9995  | -1.07111 | -0.84312 | -0.83204 | 9.261752 | 68.40998 | 4.91E-06 | 5.97E-05 | 5        |   |
| 51603_at  | 51603  | ENSG000001METTL13  | methyltransferase like   | I                      | 33 | -0.85134 | -1.02264 | -1.06104 | -0.86654 | -0.91002 | 7.573754 | 95.02723 | 1.49E-06 | 2.65E-05 | 5        |   |
| 84954_at  | 84954  | ENSG000001MPND     | MPN domain peptidase     | NI                     | 17 | -0.71705 | -1.1569  | -0.97166 | -0.87078 | -0.89309 | 5.17799  | 65.27552 | 5.82E-06 | 6.75E-05 | 5        |   |
| 8888_at   | 8888   | ENSG000001MCM3AP   | minichromosome main      | I                      | 30 | -0.79189 | -1.05429 | -1.03317 | -0.88144 | -0.96976 | 7.516466 | 62.62634 | 6.76E-06 | 7.48E-05 | 5        |   |
| 255104_at | 255104 | ENSG000001TMCO4    | transmembrane and c      | I                      | 22 | -0.83151 | -1.09217 | -0.99973 | -0.95444 | -0.92944 | 5.990586 | 74.07206 | 3.68E-06 | 4.90E-05 | 5        |   |
| 7096_at   | 7096   | ENSG000001TLR1     | toll-like receptor 1     | I                      | 11 | -1.09314 | -0.89709 | -1.11882 | -0.7717  | -1.22306 | 3.763654 | 83.77071 | 2.36E-06 | 3.64E-05 | 5        |   |
| 949_at    | 949    | ENSG000001SCARB1   | scavenger                | I                      | 20 | -0.99174 | -1.07221 | -1.08777 | -0.83784 | -1.27065 | 4.747445 | 50.64403 | 1.45E-05 | 0.000129 | 5        |   |
| 57085_at  | 57085  | ENSG000001AGTRAP   | angiotensin II receptor  | I                      | 34 | -0.95475 | -0.84727 | -1.18031 | -0.92178 | -1.3007  | 6.900812 | 70.80361 | 4.34E-06 | 5.45E-05 | 5        |   |
| 27237_at  | 27237  | ENSG000001ARHGEF16 | Rho guanine nucleotid    | NI                     | 32 | -1.02146 | -0.88787 | -1.28966 | -0.95377 | -1.25531 | 4.46923  | 51.61426 | 1.35E-05 | 0.000123 | 5        |   |
| 80758_at  | 80758  | ENSG000001PRR7     | proline rich             | I                      | 10 | -1.07188 | -0.98285 | -1.24339 | -1.01671 | -1.1745  | 6.537165 | 96.03916 | 1.43E-06 | 2.58E-05 | 5        |   |
| 26470_at  | 26470  | ENSG000001SEZ6L2   | seizure rel              | I                      | 41 | -1.07468 | -0.95357 | -1.22105 | -1.09015 | -1.21099 | 5.972363 | 110.8659 | 8.49E-07 | 1.88E-05 | 5        |   |
| 6881_at   | 6881   | ENSG000001TAF10    | TAF10 RNA polymeras      | I                      | 16 | -1.27816 | -0.88513 | -1.18094 | -0.96814 | -1.20743 | 10.56148 | 93.98303 | 1.55E-06 | 2.72E-05 | 5        |   |
| 92856_at  | 92856  | ENSG000001IMP4     | IMP4, U3 small nucleo    | I                      | 10 | -1.1762  | -0.90113 | -1.29148 | -1.00489 | -1.1661  | 8.825885 | 63.23304 | 6.52E-06 | 7.30E-05 | 5        |   |
| 10785_at  | 10785  | ENSG000001WDR4     | WD repeat                | NI                     | 41 | -1.11113 | -0.77354 | -1.00679 | -0.97919 | -1.03089 | 4.488154 | 43.76073 | 2.44E-05 | 0.000191 | 5        |   |
| 84303_at  | 84303  | ENSG000001CHCHD6   | coiled-coil-helix-coiled | I                      | 20 | -1.15593 | -0.74948 | -1.09975 | -0.99566 | -1.19198 | 7.760635 | 47.39043 | 1.84E-05 | 0.000155 | 5        |   |
| 148327_at | 148327 | ENSG000001CREB3L4  | cAMP resp                | I                      | 10 | -1.15715 | -0.82568 | -1.16673 | -0.97711 | -1.14124 | 6.46496  | 101.0629 | 1.19E-06 | 2.30E-05 | 5        |   |
| 10172_at  | 10172  | ENSG000001ZNF256   | zinc finger protein 256  | NI                     | 11 | -1.22917 | -0.95471 | -0.99218 | -0.918   | -1.16447 | 6.435997 | 19.98361 | 0.000373 | 0.001603 | 5        |   |
| 57406_at  | 57406  | ENSG000001ABHD6    | abhydrolase domain c     | I                      | 22 | -1.10576 | -0.91757 | -1.0608  | -0.97902 | -1.11548 | 5.110191 | 118.6234 | 6.63E-07 | 1.59E-05 | 5        |   |
| 252839_at | 252839 | ENSG000001TMEM9    | transmembrane protei     | I                      | 43 | -1.15524 | -1.03991 | -1.12415 | -1.00222 | -1.14753 | 7.864685 | 95.54404 | 1.46E-06 | 2.61E-05 | 5        |   |
| 4126_at   | 4126   | ENSG000001MANBA    | mannosidase              | I                      | 22 | -1.01703 | -0.86343 | -0.89963 | -0.73353 | -0.90909 | 5.367192 | 47.37179 | 1.84E-05 | 0.000155 | 5        |   |
| 3704_at   | 3704   | ENSG000001ITPA     | inosine triphosphatase   | I                      | 17 | -1.02108 | -0.85191 | -0.97321 | -0.81778 | -0.91337 | 9.1542   | 93.63037 | 1.57E-06 | 2.74E-05 | 5        |   |
| 134265_at | 134265 | ENSG000001AFAP11L  | actin filament associ    | NI                     | 43 | -0.90304 | -0.98367 | -0.92368 | -0.71311 | -1.04749 | 4.212072 | 57.95968 | 8.93E-06 | 9.11E-05 | 5        |   |
| 91582_at  | 91582  | ENSG000001RPS19BP1 | ribosomal protein S19    | I                      | 10 | -0.94721 | -0.94704 | -0.83608 | -0.85156 | -1.03164 | 10.41883 | 96.33628 | 1.42E-06 | 2.57E-05 | 5        |   |
| 7264_at   | 7264   | ENSG000001TSTA3    | tissue specific transp   | I                      | 34 | -0.98277 | -0.72134 | -0.95146 | -0.84263 | -1.0809  | 8.868384 | 73.05058 | 3.87E-06 | 5.07E-05 | 5        |   |
| 26151_at  | 26151  | ENSG000001NAT9     | N-acetyltransferase 9    | I                      | 11 | -1.01995 | -0.8223  | -0.97019 | -0.80593 | -1.11743 | 7.297977 | 35.50557 | 5.11E-05 | 0.000336 | 5        |   |
| 22820_at  | 22820  | ENSG000001COPG     | coatamer protein com     | I                      | 10 | -1.07492 | -0.72634 | -1.06201 | -0.72799 | -1.13475 | 7.956632 | 48.24619 | 1.72E-05 | 0.000148 | 5        |   |
| 114897_at | 114897 | ENSG000001C1QTNF1  | C1q and tu               | NI                     | 22 | -0.95141 | -0.83112 | -1.08222 | -0.77173 | -1.10347 | 4.18348  | 91.39023 |          |          |          |   |

|           |        |                     |                                |    |         |          |          |          |          |          |          |          |          |          |   |
|-----------|--------|---------------------|--------------------------------|----|---------|----------|----------|----------|----------|----------|----------|----------|----------|----------|---|
| 79174_at  | 79174  | ENSG000001CRELD2    | cysteine-rich Secreted         | I  | 11      | -1.09557 | -1.04071 | -1.14571 | -0.77925 | -0.99035 | 9.165974 | 94.45526 | 1.52E-06 | 2.69E-05 | 5 |
| 78999_at  | 78999  | ENSG000001LRFN4     | leucine rich repeat anc        | I  | 22      | -0.94684 | -0.90865 | -1.09509 | -0.89824 | -1.00157 | 5.402175 | 68.67512 | 4.84E-06 | 5.90E-05 | 5 |
| 79006_at  | 79006  | ENSG000001METRN     | meteorin, $\xi$ Secreted       | I  | 20      | -0.97661 | -0.96131 | -1.17844 | -0.83489 | -0.99733 | 7.551569 | 97.2248  | 1.37E-06 | 2.51E-05 | 5 |
| 5287_at   | 5287   | ENSG000001PIK3C2B   | phosphoin kinase               | NI | 11      | -0.99591 | -0.37909 | -0.4151  | -0.68123 | -1.33832 | 4.693236 | 53.02608 | 1.23E-05 | 0.000115 | 5 |
| 90990_at  | 90990  | ENSG000001KIFC2     | kinesin family member          | NI | 11      | -1.27542 | -0.51443 | -0.3976  | -0.89016 | -1.20007 | 4.747615 | 76.78023 | 3.23E-06 | 4.50E-05 | 5 |
| 112703_at | 112703 | ENSG000001FAM71E1   | family with sequence s         | NI | 11      | -1.15944 | -0.40084 | -0.90303 | -0.92664 | -1.00825 | 4.516715 | 45.27918 | 2.16E-05 | 0.000175 | 5 |
| 63941_at  | 63941  | ENSG000001NECAB3    | N-terminal Secreted            | NI | 11      | -0.93522 | -0.45123 | -1.00222 | -0.79465 | -0.94545 | 5.626883 | 29.8252  | 9.42E-05 | 0.000539 | 5 |
| 121268_at | 121268 | ENSG000001RHEBL1    | Ras homolog enriched           | NI | 10      | -0.95967 | -0.48158 | -0.85567 | -0.81313 | -1.05909 | 5.098122 | 15.14477 | 0.00094  | 0.003424 | 5 |
| 23231_at  | 23231  | ENSG000001SEL1L3    | sel-1 suppressor of lin-       | NI | 31      | -1.03559 | -0.70361 | -0.88453 | -0.61196 | -0.71789 | 4.450313 | 18.24433 | 0.000507 | 0.002055 | 5 |
| 5165_at   | 5165   | ENSG000001PDK3      | pyruvate de kinase             | NI | 9       | -1.0131  | -0.71014 | -0.99981 | -0.52451 | -0.80943 | 5.734006 | 21.46385 | 0.000293 | 0.001314 | 5 |
| 27044_at  | 27044  | ENSG000001SND1      | staphylococcal nucleas         | I  | 11      | -1.12911 | -0.53392 | -0.91132 | -0.59243 | -0.9413  | 9.072191 | 51.80036 | 1.34E-05 | 0.000122 | 5 |
| 51181_at  | 51181  | ENSG000001DCXR      | dicarbonyl/L-xylulose          | I  | 4       | -1.15556 | -0.65715 | -0.94083 | -0.59783 | -0.99371 | 8.738439 | 66.81619 | 5.35E-06 | 6.35E-05 | 5 |
| 29844_at  | 29844  | ENSG000001TFPT      | TCF3 (E2A) fusion part         | I  | 8       | -0.95841 | -0.7635  | -1.10073 | -0.6735  | -0.91385 | 8.281058 | 66.04137 | 5.58E-06 | 6.54E-05 | 5 |
| 58477_at  | 58477  | ENSG000001SRPRB     | signal recog Secreted          | I  | 30      | -1.03498 | -0.64354 | -1.05787 | -0.70157 | -0.85676 | 8.466111 | 44.5217  | 2.29E-05 | 0.000182 | 5 |
| 9709_at   | 9709   | ENSG000001HERPUD1   | homocysteine-inducibl          | I  | 32      | -1.10482 | -0.69292 | -1.06304 | -0.6694  | -0.94418 | 9.801341 | 42.39419 | 2.73E-05 | 0.000208 | 5 |
| 1978_at   | 1978   | ENSG000001EIF4EBP1  | eukaryotic translation         | I  | 25      | -0.83889 | -0.52191 | -1.10084 | -0.64005 | -1.02015 | 10.19043 | 62.30946 | 6.88E-06 | 7.59E-05 | 5 |
| 6746_at   | 6746   | ENSG000001SSR2      | signal sequence recept         | I  | 22      | -0.93536 | -0.60909 | -1.02777 | -0.68565 | -0.96478 | 10.98505 | 69.61791 | 4.61E-06 | 5.70E-05 | 5 |
| 6598_at   | 6598   | ENSG000001SMARCB1   | SWI/SNF related, matr          | NI | 23      | -0.99631 | -0.5758  | -1.11814 | -0.71103 | -0.99147 | 6.205744 | 24.2997  | 0.000191 | 0.000935 | 5 |
| 1746_at   | 1746   | ENSG000001DLX2      | distal-less homeobox           | NI | 22      | -0.97    | -0.55763 | -1.09547 | -0.77422 | -1.06309 | 3.975853 | 46.27446 | 2.00E-05 | 0.000164 | 5 |
| 25809_at  | 25809  | ENSG000001TTLL1     | tubulin tyrosine ligase        | NI | 10      | -0.56733 | -0.4817  | -0.97292 | -0.45146 | -1.02102 | 4.186749 | 46.51492 | 1.96E-05 | 0.000162 | 5 |
| 5531_at   | 5531   | ENSG000001PPP4C     | protein phk kinase             | I  | 10      | -0.76269 | -0.49742 | -0.75686 | -0.59609 | -1.0322  | 7.935872 | 31.17889 | 8.07E-05 | 0.000478 | 5 |
| 1478_at   | 1478   | ENSG000001CSTF2     | cleavage stimulation f         | I  | 11      | -0.68114 | -0.62919 | -0.87335 | -0.57664 | -1.0761  | 7.368504 | 60.29923 | 7.74E-06 | 8.20E-05 | 5 |
| 26233_at  | 26233  | ENSG000001FBXL6     | F-box and leucine-rich         | NI | 10      | -0.64862 | -0.3617  | -0.59892 | -0.61369 | -1.01339 | 5.327346 | 16.95518 | 0.000647 | 0.002513 | 5 |
| 80764_at  | 80764  | ENSG000001THAP7     | THAP domain containi           | NI | 22      | -0.77234 | -0.36439 | -0.62401 | -0.52611 | -1.01351 | 7.115491 | 52.8783  | 1.24E-05 | 0.000116 | 5 |
| 55611_at  | 55611  | ENSG000001OTUB1     | OTU domain peptidase           | NI | 22      | -0.54808 | -0.45416 | -0.59501 | -0.5558  | -1.05244 | 7.3413   | 47.45348 | 1.83E-05 | 0.000154 | 5 |
| 6182_at   | 6182   | ENSG000001MRPL12    | mitochondrial ribosom          | I  | 13      | -0.57353 | -0.5363  | -0.65988 | -0.59308 | -1.0601  | 10.09053 | 29.41374 | 9.89E-05 | 0.00056  | 5 |
| 7301_at   | 7301   | ENSG000001TYRO3     | TYRO3 prot kinase              | NI | 19      | -0.59609 | -0.38336 | -0.86081 | -0.7856  | -1.03885 | 4.042893 | 46.66998 | 1.94E-05 | 0.000161 | 5 |
| 6300_at   | 6300   | ENSG000001MAPK12    | mitogen-act kinase             | NI | 21      | -0.69347 | -0.42191 | -0.86867 | -0.82643 | -1.28493 | 5.67834  | 30.13231 | 9.09E-05 | 0.000523 | 5 |
| 65094_at  | 65094  | ENSG000001JUMD4     | jumonji domain contai          | NI | 21      | -0.54043 | -0.66923 | -0.66847 | -0.92445 | -1.21279 | 5.636311 | 42.62141 | 2.68E-05 | 0.000206 | 5 |
| 1889_at   | 1889   | ENSG000001ECE1      | endothelin peptidase           | I  | 53      | -0.61445 | -0.53469 | -0.68258 | -0.80431 | -1.06999 | 6.395391 | 14.20159 | 0.00116  | 0.004074 | 5 |
| 10005_at  | 10005  | ENSG000001ACOT8     | acyl-CoA thioesterase          | I  | 26      | -0.74738 | -0.57229 | -0.77119 | -0.80563 | -1.19138 | 7.905925 | 46.38163 | 1.98E-05 | 0.000163 | 5 |
| 399909_at | 399909 | ENSG000001PCNXL3    | pecanex-like 3 (Drosop         | NI | 11      | -0.73665 | -0.40722 | -0.7171  | -0.58133 | -1.36749 | 6.243437 | 28.85637 | 0.000106 | 0.00059  | 5 |
| 55527_at  | 55527  | ENSG000001FEM1A     | fem-1 homolog 4 (C. el         | I  | 10      | -0.91052 | -0.52702 | -0.68517 | -0.67022 | -1.27009 | 6.553377 | 50.49439 | 1.46E-05 | 0.00013  | 5 |
| 55367_at  | 55367  | ENSG000001PIDD      | p53-induced death dor          | I  | 11      | -0.83774 | -0.51536 | -0.52994 | -0.7695  | -1.0937  | 5.985713 | 60.40577 | 7.69E-06 | 8.16E-05 | 5 |
| 80199_at  | 80199  | ENSG000001FUZ       | fuzzy homc Secreted            | NI | 30      | -0.91566 | -0.55927 | -0.68297 | -0.83647 | -1.02817 | 4.790315 | 36.10876 | 4.82E-05 | 0.00032  | 5 |
| 23647_at  | 23647  | ENSG000001ARFIP2    | ADP-ribosylation facto         | I  | 74      | -1.00915 | -0.48924 | -0.6829  | -0.7515  | -1.0986  | 7.082963 | 36.50353 | 4.64E-05 | 0.00031  | 5 |
| 55139_at  | 55139  | ENSG000001ANKZF1    | ankyrin rep Secreted           | NI | 10      | -0.95266 | -0.59902 | -0.72572 | -0.33691 | -1.10492 | 6.436938 | 51.82125 | 1.33E-05 | 0.000122 | 5 |
| 1509_at   | 1509   | ENSG000001CTSD      | cathepsin I peptidase          | I  | 33      | -1.07048 | -0.59623 | -0.51584 | -0.39568 | -0.78815 | 7.623138 | 22.75312 | 0.00024  | 0.00112  | 5 |
| 93129_at  | 93129  | ENSG000001ORAI3     | ORAI calcium release-e         | NI | 20      | -1.09426 | -0.64633 | -0.64328 | -0.54201 | -0.94111 | 6.355328 | 18.10196 | 0.00052  | 0.002101 | 5 |
| 220_at    | 220    | ENSG000001ALDH1A3   | aldehyde dehydrogen            | I  | 39      | -1.24439 | -0.84601 | -0.69455 | -0.72684 | -1.02131 | 3.918438 | 31.94986 | 7.41E-05 | 0.000446 | 5 |
| 200316_at | 200316 | ENSG000001APOBEC3F  | apolipoprotein B mRN           | I  | 32      | -1.20489 | -0.8648  | -0.53233 | -0.91295 | -1.13803 | 4.090392 | 39.93431 | 3.38E-05 | 0.000245 | 5 |
| 26260_at  | 26260  | ENSG000001FBXO25    | F-box protein 25               | I  | 38      | -0.98154 | -0.73834 | -0.75637 | -0.75197 | -1.08332 | 6.534716 | 47.98935 | 1.76E-05 | 0.00015  | 5 |
| 84532_at  | 84532  | ENSG000001ACSS1     | acyl-CoA synthetase s          | NI | 33      | -0.92612 | -0.6716  | -0.80276 | -0.91445 | -1.14766 | 4.736846 | 59.3432  | 8.20E-06 | 8.54E-05 | 5 |
| 27286_at  | 27286  | ENSG000001SRPX2     | sushi-repe; Secreted           | I  | 9       | -1.18234 | -0.71772 | -0.83352 | -0.83634 | -1.17421 | 7.097362 | 44.50269 | 2.30E-05 | 0.000182 | 5 |
| 8508_at   | 8508   | ENSG000001NIPSNAP1  | nipsnap homolog 1 (C. NI       | 19 | -1.1825 | -0.73763 | -0.76095 | -0.93038 | -0.96821 | 4.919743 | 25.12148 | 0.000171 | 0.000854 | 5        |   |
| 80700_at  | 80700  | ENSG000001UBXN6     | UBX domain protein 6           | I  | 20      | -1.09223 | -0.70576 | -0.81133 | -0.75637 | -0.99694 | 7.892708 | 88.96264 | 1.89E-06 | 3.11E-05 | 5 |
| 93100_at  | 93100  | ENSG000001NAPRT1    | nicotinate phosphorib          | I  | 10      | -1.08147 | -0.73065 | -0.83005 | -0.87766 | -0.97153 | 7.266995 | 97.63701 | 1.35E-06 | 2.48E-05 | 5 |
| 84305_at  | 84305  | ENSG000001WIBG      | within bgcn homolog            | I  | 10      | -0.98309 | -1.10378 | -0.72699 | -0.47951 | -1.07904 | 6.512518 | 25.85075 | 0.000155 | 0.000789 | 5 |
| 85026_at  | 85026  | ENSG000001C9orf37   | chromosome 9 open r            | NI | 11      | -0.79575 | -0.81946 | -0.67636 | -0.66157 | -1.09671 | 5.996516 | 24.17995 | 0.000195 | 0.000946 | 5 |
| 788_at    | 788    | ENSG000001SLC25A20  | solute carri transport         | NI | 30      | -0.77986 | -1.01166 | -0.70798 | -0.75174 | -1.02183 | 5.183676 | 44.34672 | 2.33E-05 | 0.000184 | 5 |
| 124995_at | 124995 | ENSG000001MRPL10    | mitochondrial ribosom          | I  | 10      | -1.00055 | -1.03342 | -0.42998 | -0.59089 | -0.95325 | 8.611843 | 74.23174 | 3.65E-06 | 4.88E-05 | 5 |
| 116841_at | 116841 | ENSG000001SNAF47    | synaptosomal-associat          | I  | 11      | -0.96958 | -0.82453 | -0.53016 | -0.65088 | -1.02405 | 7.597754 | 42.89322 | 2.62E-05 | 0.000202 | 5 |
| 10654_at  | 10654  | ENSG000001PMVK      | phosphom kinase                | I  | 33      | -1.00511 | -0.87356 | -0.59696 | -0.63205 | -0.99908 | 7.210405 | 46.19154 | 2.01E-05 | 0.000165 | 5 |
| 112849_at | 112849 | ENSG000001C14orf149 | chromosome 14 open             | NI | 20      | -0.83799 | -1.08235 | -0.51545 | -0.62854 | -1.04233 | 6.463247 | 76.44721 | 3.29E-06 | 4.55E-05 | 5 |
| 2101_at   | 2101   | ENSG000001ESRRA     | estrogen- $\alpha$ nuclear rec | NI | 6       | -0.81546 | -1.02478 | -0.53799 | -0.7817  | -0.98509 | 4.819384 | 11.49512 | 0.000286 | 0.00718  | 5 |
| 51409_at  | 51409  | ENSG000001HEMK1     | HemK metl Secreted             | NI | 21      | -0.89923 | -1.10965 | -0.47258 | -0.74069 | -0.92373 | 5.085149 | 79.48225 | 2.85E-06 | 4.13E-05 | 5 |
| 53838_at  | 53838  | ENSG000001C11orf24  | chromosom Secreted             | NI | 11      | -1.40096 | -0.51971 | -0.57842 | -0.58043 | -0.88145 | 5.982236 | 31.16553 | 8.08E-05 | 0.000478 | 5 |
| 10362_at  | 10362  | ENSG000001HMG20B    | high mobility group 20         | I  | 28      | -1.51434 | -1.00262 | -0.68327 | -0.72132 | -0.97099 | 8.196801 | 91.6304  | 1.70E-06 | 2.91E-05 | 5 |
| 10423_at  | 10423  | ENSG000001CDIPT     | CDP-diacyl transport           | NI | 30      | -1.05525 | -0.85591 | -0.68587 | -0.59402 | -0.73363 | 5.42307  | 69.62159 | 4.61E-06 | 5.70E-05 | 5 |
| 6184_at   | 6184   | ENSG000001RPN1      | ribophorin I                   | I  | 40      | -1.0095  | -0.93211 | -0.79052 | -0.54894 | -0.85209 | 9.267485 | 81.53577 | 2.60E-06 | 3.87E-05 | 5 |
| 37_at     | 37     | ENSG000001ACADVL    | acyl-CoA dehydrogena           | I  | 28      | -1.00976 | -0.95843 | -0.74149 | -0.71213 | -0.88234 | 8.164201 | 33.21456 | 6.46E-05 | 0.000402 | 5 |
| 2495_at   | 2495   | ENSG000001FTH1      | ferritin, heavy polypep        | I  | 12      | -1.1465  | -0.89593 | -0.87934 | -0.71143 | -0.58681 | 8.997988 | 17.10687 | 0.000628 | 0.002452 | 5 |
| 123355_at | 123355 | ENSG000001LRRC28    | leucine rich repeat con        | NI | 41      | -1.12617 | -0.86713 | -0.96274 | -0.69131 | -0.60212 | 5.510435 | 70.39004 | 4.43E-06 | 5.54E-05 | 5 |
| 126282_at | 126282 | ENSG000001TNFAIP8L1 | tumor necrosis factor,         | I  | 19      | -1.12202 | -0.82433 | -0.83819 | -0.91741 | -0.76065 | 5.596486 | 55.61739 | 1.04E-05 | 0.000101 | 5 |
| 11118_at  | 11118  | ENSG000001BTN3A2    | butyrophilli Secreted          | I  | 29      | -1.20875 | -0.85963 | -0.85028 | -0.75304 | -0.833   | 7.717717 | 40.7715  | 3.14E-05 | 0.000231 | 5 |
| 58492_at  | 58492  | ENSG000001ZNF77     | zinc finger protein 77         | NI | 11      | -1.28045 | -0.75935 | -0.50081 | -0.52458 | -1.0805  | 4.809858 | 80.54149 | 2.72E-06 | 3.99E-05 | 5 |
| 9294_at   | 9294   | ENSG000001S1PR2     | sphingosin G-protein c         | NI | 22      | -1.18014 | -0.92295 | -0.93219 | -0.54263 | -0.92859 | 5.357977 | 37.37068 | 4.27E-05 | 0.000292 | 5 |
| 51614_at  | 51614  | ENSG000001ERGIC3    | ERGIC and golgi 3              | I  | 28      | -1.12299 | -0.82553 | -0.91921 | -0.74533 |          |          |          |          |          |   |

|           |        |                    |                          |                      |    |          |          |          |          |          |          |          |          |          |          |   |
|-----------|--------|--------------------|--------------------------|----------------------|----|----------|----------|----------|----------|----------|----------|----------|----------|----------|----------|---|
| 4515_at   | 4515   | ENSG000001MTCP1    | mature T-cell prolifera  | NI                   | 11 | -0.82599 | -1.41023 | -0.50157 | -0.86171 | -0.95773 | 4.327605 | 32.85847 | 6.71E-05 | 0.000413 | 5        |   |
| 127943_at | 127943 | ENSG000001FCRLB    | Fc receptor-like B       | NI                   | 22 | -0.39304 | -1.33582 | -0.67649 | -0.97239 | -0.8917  | 4.277445 | 74.64265 | 3.58E-06 | 4.82E-05 | 5        |   |
| 7107_at   | 7107   | ENSG000001GPR137B  | G protein-coupled rectr  | I                    | 11 | -0.69758 | -1.51272 | -0.73482 | -0.98176 | -0.98043 | 6.240788 | 67.17166 | 5.25E-06 | 6.26E-05 | 5        |   |
| 84524_at  | 84524  | ENSG000001ZC3H8    | zinc finger CCCH-type C  | I                    | 11 | -0.64264 | -1.35381 | -0.8818  | -1.01283 | -1.05904 | 6.996109 | 62.03472 | 6.99E-06 | 7.67E-05 | 5        |   |
| 54503_at  | 54503  | ENSG000001ZDHH1C3  | zinc finger, DHHC-type I | I                    | 11 | -1.00528 | -1.5729  | -0.66264 | -0.76874 | -1.00078 | 7.061139 | 46.49189 | 1.97E-05 | 0.000162 | 5        |   |
| 85458_at  | 85458  | ENSG000001DIXDC1   | DIX domain containing NI | I                    | 44 | -0.89378 | -1.34212 | -0.77191 | -0.98993 | -0.89928 | 4.926947 | 100.2009 | 1.23E-06 | 2.35E-05 | 5        |   |
| 55664_at  | 55664  | ENSG000001CDC37L1  | cell division cycle 37 h | I                    | 22 | -1.0727  | -1.44743 | -0.726   | -0.94506 | -0.88032 | 5.966452 | 100.9537 | 1.20E-06 | 2.30E-05 | 5        |   |
| 3111_at   | 3111   | NA                 | HLA-DOA                  | major histc Secreted | NI | 45       | -1.05616 | -1.24506 | -0.67302 | -0.64829 | -0.72634 | 4.169643 | 15.34038 | 0.000901 | 0.003306 | 5 |
| 1138_at   | 1138   | ENSG000001CHRNA5   | cholinergic ion channe   | NI                   | 22 | -0.91675 | -1.43644 | -0.7738  | -0.73501 | -0.63998 | 4.956622 | 71.56786 | 4.17E-06 | 5.34E-05 | 5        |   |
| 5372_at   | 5372   | ENSG000001PMM1     | phosphomannomutasi       | I                    | 10 | -0.84978 | -1.27334 | -0.90386 | -0.70205 | -0.69185 | 7.662316 | 83.9036  | 2.34E-06 | 3.63E-05 | 5        |   |
| 55669_at  | 55669  | ENSG000001MFN1     | mitofusin 1 GTPase       | I                    | 29 | -0.98465 | -1.24331 | -0.77956 | -0.80913 | -0.63821 | 8.223583 | 89.69569 | 1.84E-06 | 3.05E-05 | 5        |   |
| 285203_at | 285203 | ENSG000001C3orf64  | chromosome 3 open r      | NI                   | 21 | -1.0062  | -1.26589 | -0.86717 | -0.74592 | -0.68459 | 5.854545 | 88.2429  | 1.95E-06 | 3.18E-05 | 5        |   |
| 50848_at  | 50848  | ENSG000001F11R     | F11 recept Secreted      | NI                   | 65 | -0.94334 | -1.23894 | -0.86901 | -0.79491 | -0.73453 | 6.454755 | 67.7132  | 5.10E-06 | 6.13E-05 | 5        |   |
| 8801_at   | 8801   | ENSG000001SUCLG2   | succinate-CoA ligase, C  | I                    | 14 | -0.8991  | -1.24804 | -0.87249 | -0.85716 | -0.7044  | 9.128763 | 99.21577 | 1.27E-06 | 2.39E-05 | 5        |   |
| 79668_at  | 79668  | ENSG000001PARP8    | poly (ADP-ribose) poly   | NI                   | 10 | -1.02861 | -0.7059  | -0.56135 | -0.99058 | -0.87009 | 5.739414 | 32.39027 | 7.06E-05 | 0.00043  | 5        |   |
| 201266_at | 201266 | ENSG000001SLC39A11 | solute carri transporte  | NI                   | 30 | -1.08411 | -0.59    | -0.70875 | -0.96762 | -0.84722 | 4.650192 | 32.19986 | 7.21E-05 | 0.000437 | 5        |   |
| 26230_at  | 26230  | ENSG000001TIAM2    | T-cell lymphoma invas    | I                    | 11 | -1.21576 | -0.91989 | -0.58873 | -1.05407 | -0.6846  | 5.899623 | 35.1715  | 5.29E-05 | 0.000344 | 5        |   |
| 51616_at  | 51616  | ENSG000001TAF9B    | TAF9B RNA polymeras      | I                    | 29 | -1.01208 | -0.95152 | -0.62291 | -0.92416 | -0.634   | 6.471471 | 26.02835 | 0.000151 | 0.000776 | 5        |   |
| 5993_at   | 5993   | ENSG000001RFX5     | regulatory factor X, 5   | ( I                  | 33 | -1.03298 | -0.97528 | -0.8089  | -0.9039  | -0.68768 | 7.474825 | 62.50629 | 6.80E-06 | 7.52E-05 | 5        |   |
| 11212_at  | 11212  | ENSG000001PROSC    | proline synthetase co-   | I                    | 31 | -1.09337 | -0.99024 | -0.68169 | -0.90064 | -0.7538  | 7.243398 | 39.78105 | 3.42E-05 | 0.000247 | 5        |   |
| 151963_at | 151963 | ENSG000001MB21D2   | Mab-21 domain contai     | NI                   | 22 | -0.87678 | -0.6993  | -0.83585 | -1.01086 | -0.7556  | 5.179663 | 44.50448 | 2.30E-05 | 0.000182 | 5        |   |
| 51560_at  | 51560  | ENSG000001RAB6B    | RAB6B, me GTPase         | NI                   | 33 | -0.89912 | -0.59312 | -0.94937 | -1.05084 | -0.70141 | 4.00024  | 83.97577 | 2.34E-06 | 3.63E-05 | 5        |   |
| 23236_at  | 23236  | ENSG000001PLCB1    | phospholipase C, beta    | NI                   | 32 | -0.97189 | -0.79794 | -0.94758 | -1.02256 | -0.85492 | 4.045722 | 75.787   | 3.39E-06 | 4.65E-05 | 5        |   |
| 5763_at   | 5763   | ENSG000001PTMS     | parathyromosin           | I                    | 11 | -1.10029 | -0.86112 | -1.02946 | -0.95574 | -0.91039 | 6.198479 | 25.41442 | 0.000164 | 0.000827 | 5        |   |
| 26088_at  | 26088  | ENSG000001GGA1     | golgi-associated, gamr   | NI                   | 30 | -0.97921 | -0.84595 | -1.06243 | -0.99384 | -0.9234  | 4.92148  | 90.00046 | 1.82E-06 | 3.03E-05 | 5        |   |
| 9918_at   | 9918   | ENSG000001NCAPD2   | non-SMC condensin I C    | I                    | 18 | -0.98685 | -0.90677 | -1.02478 | -0.99321 | -0.92039 | 7.64413  | 33.41618 | 6.33E-05 | 0.000395 | 5        |   |
| 23394_at  | 23394  | ENSG000001ADNP     | activity-dependent nei   | I                    | 31 | -1.03639 | -0.91002 | -1.08798 | -0.91178 | -0.75962 | 9.891646 | 96.0066  | 1.44E-06 | 2.58E-05 | 5        |   |
| 594_at    | 594    | ENSG000001BCKDHB   | branched C Secreted      | I                    | 43 | -0.98492 | -0.90232 | -1.11833 | -0.97786 | -0.75555 | 7.493863 | 81.08008 | 2.65E-06 | 3.93E-05 | 5        |   |
| 9779_at   | 9779   | ENSG000001TBC1D5   | TBC1 domain family, n    | I                    | 22 | -0.90896 | -0.84932 | -1.04993 | -0.84299 | -0.73822 | 8.076838 | 58.80078 | 8.48E-06 | 8.75E-05 | 5        |   |
| 617_at    | 617    | ENSG000001BCS1L    | BCS1-like (S. cerevisiae | I                    | 17 | -1.0097  | -0.80876 | -1.03731 | -0.81378 | -0.77449 | 7.787578 | 72.25613 | 4.03E-06 | 5.21E-05 | 5        |   |
| 116832_at | 116832 | ENSG000001RPL39L   | ribosomal protein L39-   | I                    | 11 | -1.01333 | -0.87336 | -1.00248 | -0.81674 | -0.79354 | 9.5702   | 69.51963 | 4.63E-06 | 5.72E-05 | 5        |   |
| 22949_at  | 22949  | ENSG000001PTGR1    | prostaglandin reducta-   | I                    | 11 | -1.09899 | -0.6761  | -0.66616 | -0.78676 | -0.64132 | 8.045691 | 39.55113 | 3.49E-05 | 0.000251 | 5        |   |
| 49854_at  | 49854  | ENSG000001ZNF295   | zinc finger protein 295  | I                    | 33 | -1.08258 | -0.67168 | -0.86201 | -0.81815 | -0.39878 | 6.18126  | 66.31473 | 5.50E-06 | 6.47E-05 | 5        |   |
| 3455_at   | 3455   | ENSG000001IFNAR2   | interferon (alpha, beta  | NI                   | 31 | -1.10376 | -0.73782 | -0.73068 | -0.80931 | -0.45236 | 5.415816 | 53.62663 | 1.18E-05 | 0.000111 | 5        |   |
| 102_at    | 102    | ENSG000001ADAM10   | ADAM met peptidase       | NI                   | 44 | -1.1046  | -1.00019 | -0.7872  | -0.65534 | -0.44321 | 6.50253  | 45.281   | 2.16E-05 | 0.000175 | 5        |   |
| 1968_at   | 1968   | ENSG000001EIF2S3   | eukaryotic GTPase        | I                    | 20 | -1.05935 | -1.00557 | -0.81997 | -0.79891 | -0.51427 | 10.39398 | 87.00241 | 2.05E-06 | 3.31E-05 | 5        |   |
| 8479_at   | 8479   | ENSG000001HIRP3    | HIRA interacting protei  | I                    | 10 | -1.10941 | -0.97088 | -0.87416 | -0.71991 | -0.52613 | 7.50447  | 47.50028 | 1.82E-05 | 0.000154 | 5        |   |
| 9949_at   | 9949   | ENSG000001AMMECR1  | Alport syndrome, men     | I                    | 22 | -0.95784 | -1.14539 | -0.81024 | -0.77782 | -0.51344 | 7.954603 | 56.07568 | 1.01E-05 | 9.92E-05 | 5        |   |
| 79075_at  | 79075  | ENSG000001DSCC1    | defective in sister chro | I                    | 31 | -0.9666  | -1.12461 | -0.81558 | -0.8219  | -0.44526 | 7.648527 | 64.60025 | 6.04E-06 | 6.94E-05 | 5        |   |
| 3857_at   | 3857   | ENSG000001KRT9     | keratin 9                | NI                   | 19 | -1.03688 | -1.1064  | -0.83009 | -0.83265 | -0.48359 | 4.09142  | 45.16769 | 2.18E-05 | 0.000176 | 5        |   |
| 130872_at | 130872 | ENSG000001AHS2A    | AHA1, activator of hea   | NI                   | 11 | -0.86957 | -1.05452 | -0.68348 | -0.51674 | -0.45299 | 4.197863 | 10.97635 | 0.002644 | 0.008121 | 5        |   |
| 134266_at | 134266 | ENSG000001GRPEL2   | GrpE-like 2, mitochonr   | I                    | 15 | -1.01463 | -1.00037 | -0.61232 | -0.55046 | -0.58345 | 7.22517  | 60.27045 | 7.76E-06 | 8.20E-05 | 5        |   |
| 80321_at  | 80321  | ENSG000001CEP70    | centrosomal protein 70   | NI                   | 83 | -1.11593 | -1.11499 | -0.62392 | -0.6884  | -0.35686 | 6.33792  | 60.67377 | 7.57E-06 | 8.05E-05 | 5        |   |
| 112479_at | 112479 | ENSG000001ER12     | ER11 exoribonuclease     | I                    | 43 | -1.09749 | -1.02557 | -0.66264 | -0.75118 | -0.36982 | 4.856891 | 73.44986 | 3.80E-06 | 5.00E-05 | 5        |   |
| 79230_at  | 79230  | ENSG000001ZNF557   | zinc finger protein 557  | NI                   | 33 | -0.89234 | -1.08782 | -0.74529 | -0.75891 | -0.41961 | 5.040399 | 66.06332 | 5.57E-06 | 6.54E-05 | 5        |   |
| 7257_at   | 7257   | ENSG000001TSNAX    | translin-as1 transporte  | I                    | 22 | -0.9762  | -1.0662  | -0.66791 | -0.75976 | -0.51438 | 8.933789 | 61.61468 | 7.16E-06 | 7.76E-05 | 5        |   |
| 3329_at   | 3329   | ENSG000001HSPD1    | heat shock 60kDa prot    | I                    | 12 | -0.8541  | -1.05604 | -0.6275  | -0.72807 | -0.50242 | 11.26833 | 72.05015 | 4.07E-06 | 5.24E-05 | 5        |   |
| 9868_at   | 9868   | ENSG000001TOMM70A  | translocase Secreted     | I                    | 28 | -0.89582 | -1.1138  | -0.61343 | -0.72844 | -0.51502 | 8.420014 | 76.92889 | 3.21E-06 | 4.48E-05 | 5        |   |
| 23178_at  | 23178  | ENSG000001PASK     | PAS domai kinase         | NI                   | 10 | -0.91005 | -0.88902 | -1.05449 | -0.73421 | -0.3321  | 4.941569 | 79.95997 | 2.79E-06 | 4.06E-05 | 5        |   |
| 9156_at   | 9156   | ENSG000001EXO1     | exonuclease 1            | I                    | 10 | -1.12465 | -0.98674 | -1.07962 | -0.7485  | -0.31952 | 7.546365 | 78.05576 | 3.05E-06 | 4.32E-05 | 5        |   |
| 529_at    | 529    | ENSG000001ATP6V1E1 | ATPase, H+ transporte    | I                    | 10 | -1.09396 | -0.98334 | -1.08533 | -0.75944 | -0.70928 | 10.44508 | 74.70548 | 3.57E-06 | 4.81E-05 | 5        |   |
| 26046_at  | 26046  | ENSG000001LTN1     | listerin E3 ubiquitin pr | I                    | 22 | -0.94921 | -1.07248 | -1.0171  | -0.91858 | -0.69238 | 7.680019 | 79.70818 | 2.82E-06 | 4.09E-05 | 5        |   |
| 56945_at  | 56945  | ENSG000001MRPS22   | mitochond Secreted       | I                    | 17 | -1.0345  | -0.99927 | -0.94677 | -0.87375 | -0.73058 | 10.19009 | 60.25156 | 7.76E-06 | 8.20E-05 | 5        |   |
| 1314_at   | 1314   | ENSG000001COPA     | coatome r Secreted       | I                    | 22 | -1.07402 | -1.0153  | -1.01739 | -0.89965 | -0.69035 | 8.460738 | 82.35834 | 2.51E-06 | 3.77E-05 | 5        |   |
| 201562_at | 201562 | ENSG000001PTPLB    | protein tyrosine phosp   | NI                   | 11 | -1.07223 | -1.04062 | -1.17174 | -0.85861 | -0.535   | 4.042008 | 14.41662 | 0.000104 | 0.003912 | 5        |   |
| 8886_at   | 8886   | ENSG000001DDX18    | DEAD (Asp-Glu-Ala-As     | I                    | 14 | -1.0922  | -1.07933 | -1.14347 | -0.9345  | -0.49734 | 8.96011  | 96.76677 | 1.39E-06 | 2.54E-05 | 5        |   |
| 79728_at  | 79728  | ENSG000001PALB2    | partner and localizer o  | I                    | 11 | -0.97979 | -1.09296 | -1.13326 | -0.96132 | -0.56434 | 6.960501 | 78.66675 | 2.96E-06 | 4.23E-05 | 5        |   |
| 84172_at  | 84172  | ENSG000001POLR1B   | polymerase (RNA) I po    | I                    | 66 | -1.02057 | -1.13733 | -1.15709 | -0.97647 | -0.57852 | 7.169334 | 108.6724 | 9.13E-07 | 1.98E-05 | 5        |   |
| 54953_at  | 54953  | ENSG000001C1orf27  | chromosome 1 open r      | I                    | 31 | -0.81681 | -1.00472 | -0.90274 | -0.77581 | -0.40074 | 5.765293 | 71.04032 | 4.28E-06 | 5.42E-05 | 5        |   |
| 5775_at   | 5775   | ENSG000001PTPN4    | protein tyr phosphopr    | NI                   | 9  | -0.67176 | -1.11396 | -0.94555 | -0.71566 | -0.5142  | 5.939873 | 25.91145 | 0.000153 | 0.000785 | 5        |   |
| 5019_at   | 5019   | ENSG000001OXC1     | 3-oxoacid CoA transfer   | I                    | 32 | -0.797   | -1.02097 | -0.89428 | -0.86376 | -0.69067 | 5.807569 | 45.65893 | 2.10E-05 | 0.00017  | 5        |   |
| 55759_at  | 55759  | ENSG000001WDR12    | WD repeat domain 12      | I                    | 13 | -0.8456  | -1.0715  | -0.84981 | -0.90866 | -0.54467 | 10.49087 | 90.43422 | 1.78E-06 | 3.01E-05 | 5        |   |
| 83752_at  | 83752  | ENSG000001LONP2    | lon peptidase            | I                    | 33 | -0.76517 | -1.11451 | -0.85433 | -0.95547 | -0.63459 | 6.753273 | 37.19153 | 4.34E-05 | 0.000295 | 5        |   |
| 57477_at  | 57477  | ENSG000001SHROOM4  | shroom family membe      | NI                   | 31 | -0.75456 | -1.10181 | -0.75003 | -0.60263 | -0.65755 | 3.783525 | 33.08697 | 6.55E-05 | 0.000406 | 5        |   |
| 55353_at  | 55353  | ENSG000001LAPTM4B  | lysosomal protein tran   | I                    | 22 | -0.82149 | -1.00053 | -0.70258 | -0.70165 | -0.6055  | 10.12883 | 64.40785 | 6.11E-06 | 6.98E-05 | 5        |   |
| 22916_at  | 22916  | ENSG000001NCBP2    | nuclear cap binding pr   | I                    | 55 | -0.77761 | -1.05912 | -0.73636 | -0.75428 | -0.62537 | 8.954532 | 76.77485 | 3.23E-06 | 4.50E-05 | 5        |   |
| 79672_at  | 79672  | ENSG000001FN3KRP   | fructosami kinase        | I                    | 31 | -0.91934 | -1.01856 | -0.6829  | -0.66908 | -0.61155 | 6.870419 | 48.81276 | 1.65E-05 | 0.000144 | 5        |   |
| 3428_at   | 3428   | ENSG000001IFI16    | interferon, gamma-ind    | I                    | 30 | -0.93912 | -1.04371 | -0.79757 | -0.69933 | -0.58259 |          |          |          |          |          |   |

|           |        |                    |                             |    |           |          |          |          |          |          |          |          |          |   |
|-----------|--------|--------------------|-----------------------------|----|-----------|----------|----------|----------|----------|----------|----------|----------|----------|---|
| 29_at     | 29     | ENSG000001ABR      | active BCR-related gen I    | 39 | -1.13267  | -1.12717 | -0.86769 | -0.82982 | -0.68004 | 8.544945 | 84.79575 | 2.26E-06 | 3.54E-05 | 5 |
| 114926_at | 114926 | ENSG000001C8orf40  | chromosome 8 open r r I     | 10 | -1.122765 | -1.01994 | -0.94412 | -0.65443 | -0.75503 | 8.30014  | 67.73457 | 5.09E-06 | 6.13E-05 | 5 |
| 79001_at  | 79001  | ENSG000001VKORC1   | vitamin K e ptidase I       | 6  | -1.13377  | -0.98924 | -1.02164 | -0.77879 | -0.64714 | 10.30512 | 52.74325 | 1.25E-05 | 0.000116 | 5 |
| 57102_at  | 57102  | ENSG000001C12orf4  | chromosome 12 open I        | 22 | -1.30343  | -1.00421 | -1.06629 | -0.81396 | -0.72685 | 6.416721 | 67.22296 | 5.23E-06 | 6.24E-05 | 5 |
| 25824_at  | 25824  | ENSG000001PRDX5    | peroxiredoxin 5 I           | 12 | -1.27157  | -1.09087 | -0.97245 | -0.88206 | -0.88592 | 10.71234 | 106.6796 | 9.77E-07 | 2.04E-05 | 5 |
| 1622_at   | 1622   | ENSG000001DBI      | diazepam binding inhil I    | 19 | -1.21696  | -0.98462 | -0.89229 | -0.82069 | -0.79972 | 10.69038 | 103.6895 | 1.08E-06 | 2.19E-05 | 5 |
| 9516_at   | 9516   | ENSG000001LITAF    | lipopolysac Secreted I      | 22 | -1.27511  | -1.05881 | -0.86546 | -0.79652 | -0.79096 | 9.330682 | 85.46065 | 2.19E-06 | 3.47E-05 | 5 |
| 7421_at   | 7421   | ENSG000001VDR      | vitamin D ( nuclear rec I   | 44 | -0.7501   | -1.10672 | -1.10774 | -1.15601 | -0.66234 | 5.485105 | 47.19512 | 1.86E-05 | 0.000156 | 5 |
| 7918_at   | 7918   | NA GPANK1          | G patch domain and ar I     | 22 | -0.78564  | -1.14697 | -1.00054 | -1.09459 | -0.77168 | 7.788912 | 120.7624 | 6.21E-07 | 1.52E-05 | 5 |
| 9738_at   | 9738   | ENSG000001CCP110   | centriolar coiled coil pi I | 33 | -0.94161  | -1.12701 | -0.93653 | -1.00025 | -0.47715 | 6.186688 | 96.2747  | 1.42E-06 | 2.57E-05 | 5 |
| 150864_at | 150864 | ENSG000001FAM117B  | family with sequence s NI   | 21 | -0.95517  | -1.06642 | -0.90219 | -0.91067 | -0.54665 | 4.597878 | 53.31203 | 1.21E-05 | 0.000113 | 5 |
| 11051_at  | 11051  | ENSG000001NUDT21   | nudix (nucleoside diph I    | 28 | -1.02696  | -1.04616 | -0.92576 | -0.93814 | -0.56562 | 9.176307 | 92.42126 | 1.65E-06 | 2.85E-05 | 5 |
| 116064_at | 116064 | ENSG000001LRRC58   | leucine rich repeat con I   | 30 | -0.98723  | -1.19967 | -0.88029 | -1.09491 | -0.6843  | 9.156715 | 79.38417 | 2.87E-06 | 4.14E-05 | 5 |
| 51602_at  | 51602  | ENSG000001NOP58    | NOP58 ribonucleoprot I      | 19 | -0.86472  | -1.21484 | -0.9036  | -1.05377 | -0.61709 | 10.26527 | 63.91974 | 6.28E-06 | 7.12E-05 | 5 |
| 170506_at | 170506 | ENSG000001DHX36    | DEAH (Asp-Glu-Ala-His I     | 48 | -0.84013  | -1.1526  | -0.99727 | -1.10226 | -0.59133 | 8.213958 | 104.2408 | 1.06E-06 | 2.16E-05 | 5 |
| 8930_at   | 8930   | ENSG000001MBD4     | methyl-CpG binding dc I     | 30 | -0.91453  | -1.38378 | -1.12332 | -0.99468 | -0.81172 | 7.958725 | 84.70295 | 2.26E-06 | 3.55E-05 | 5 |
| 51377_at  | 51377  | ENSG000001UCHL5    | ubiquitin c; peptidase I    | 86 | -0.9585   | -1.34967 | -0.93718 | -1.07957 | -0.76977 | 5.694934 | 127.6929 | 5.06E-07 | 1.33E-05 | 5 |
| 5889_at   | 5889   | ENSG000001RAD51C   | RAD51 homolog C (S. C I     | 33 | -1.01128  | -1.3641  | -1.03232 | -1.10279 | -0.79326 | 8.208987 | 132.9203 | 4.37E-07 | 1.21E-05 | 5 |
| 84318_at  | 84318  | ENSG000001CCDC77   | coiled-coil domain con I    | 20 | -0.93035  | -1.16717 | -1.06923 | -0.84575 | -0.72574 | 6.832005 | 87.95101 | 1.97E-06 | 3.21E-05 | 5 |
| 64208_at  | 64208  | ENSG000001POPODC3  | popeye domain contai I      | 11 | -0.87236  | -1.25797 | -1.13377 | -0.81503 | -0.75603 | 7.868547 | 108.1197 | 9.31E-07 | 1.99E-05 | 5 |
| 80198_at  | 80198  | ENSG000001MUS81    | MUS81 endonuclease I        | 11 | -0.85848  | -1.18922 | -0.9855  | -0.87356 | -0.93647 | 8.035333 | 66.32998 | 5.49E-06 | 6.47E-05 | 5 |
| 246243_at | 246243 | ENSG000001RNA5EH1  | ribonuclease H1 I           | 9  | -0.88647  | -1.20462 | -1.12496 | -0.91902 | -0.93901 | 8.245004 | 70.0703  | 4.50E-06 | 5.61E-05 | 5 |
| 79876_at  | 79876  | ENSG000001UBA5     | ubiquitin-like modifier I   | 40 | -0.84331  | -1.21232 | -0.91368 | -0.91942 | -0.70158 | 6.645225 | 102.5306 | 1.13E-06 | 2.23E-05 | 5 |
| 2960_at   | 2960   | ENSG000001GTF2E1   | general transcription f. I  | 21 | -0.91759  | -1.14899 | -0.88048 | -0.9654  | -0.84531 | 6.823825 | 67.15646 | 5.25E-06 | 6.26E-05 | 5 |
| 4000_at   | 4000   | ENSG000001LMNA     | lamin A/C I                 | 61 | -0.9139   | -1.13204 | -0.94856 | -0.95569 | -0.83791 | 9.556478 | 96.25794 | 1.42E-06 | 2.57E-05 | 5 |
| 80254_at  | 80254  | ENSG000001CEP63    | centrosomal protein 6: NI   | 50 | -0.95525  | -1.09904 | -0.85302 | -0.78654 | -0.65626 | 4.965882 | 84.00004 | 2.33E-06 | 3.63E-05 | 5 |
| 51068_at  | 51068  | ENSG000001NMD3     | NMD3 homolog (S. cer I      | 25 | -1.03499  | -1.10004 | -0.92238 | -0.75356 | -0.67021 | 7.895132 | 75.93533 | 3.37E-06 | 4.63E-05 | 5 |
| 307_at    | 307    | ENSG000001ANXA4    | annexin A4 I                | 70 | -1.05563  | -1.09894 | -0.81419 | -0.78499 | -0.82219 | 9.620004 | 84.75268 | 2.26E-06 | 3.55E-05 | 5 |
| 5608_at   | 5608   | ENSG000001MAP2K6   | mitogen-ac kinase NI        | 8  | -1.055    | -1.13191 | -0.84463 | -0.92818 | -0.7244  | 5.130574 | 15.15733 | 0.000937 | 0.003416 | 5 |
| 9324_at   | 9324   | ENSG000001HMGN3    | high mobility group nu I    | 11 | -0.84165  | -1.14442 | -0.76479 | -0.94161 | -0.95772 | 8.512147 | 72.86664 | 3.91E-06 | 5.10E-05 | 5 |
| 56947_at  | 56947  | ENSG000001MFF      | mitochondrial fission f I   | 45 | -0.92718  | -1.18074 | -0.77798 | -0.83353 | -0.97917 | 8.604534 | 71.32426 | 4.22E-06 | 5.38E-05 | 5 |
| 8407_at   | 8407   | ENSG000001TAGLN2   | transgelin 2 I              | 17 | -1.03865  | -1.13457 | -0.82991 | -0.98271 | -0.95903 | 9.772159 | 39.06353 | 3.65E-05 | 0.00026  | 5 |
| 23484_at  | 23484  | ENSG000001LEPROTL1 | leptin receptor overlap I   | 33 | -0.97893  | -1.14481 | -0.90931 | -0.91202 | -0.96428 | 7.712665 | 93.92751 | 1.55E-06 | 2.72E-05 | 5 |
| 9470_at   | 9470   | ENSG000001EIF4E2   | eukaryotic translation I    | 13 | -0.97238  | -1.20023 | -0.88534 | -0.95607 | -0.90699 | 9.467637 | 94.30938 | 1.53E-06 | 2.70E-05 | 5 |
| 10519_at  | 10519  | ENSG000001CIB1     | calcium and integrin bi I   | 9  | -1.02639  | -1.03855 | -0.88651 | -0.91466 | -0.87802 | 10.43325 | 61.01882 | 7.42E-06 | 7.97E-05 | 5 |
| 130814_at | 130814 | ENSG000001PQLC3    | PQ loop repeat contai I     | 21 | -0.96036  | -1.00467 | -0.94786 | -0.84491 | -0.80744 | 6.968014 | 81.85216 | 2.56E-06 | 3.83E-05 | 5 |
| 84186_at  | 84186  | ENSG000001ZCCHC7   | zinc finger, CCHC dom: I    | 21 | -1.01806  | -0.96928 | -0.96124 | -0.91761 | -0.83144 | 7.98041  | 86.05893 | 2.14E-06 | 3.40E-05 | 5 |
| 124565_at | 124565 | ENSG000001SLC38A10 | solute carrier family 38 I  | 22 | -0.94569  | -1.1196  | -0.96733 | -0.93845 | -0.94492 | 5.786026 | 48.99431 | 1.63E-05 | 0.000142 | 5 |
| 22928_at  | 22928  | ENSG000001SEPHS2   | selenopho: kinase I         | 11 | -0.98444  | -1.15145 | -1.00573 | -0.94918 | -0.92496 | 8.752542 | 64.42899 | 6.10E-06 | 6.98E-05 | 5 |
| 23568_at  | 23568  | ENSG000001ARL2BP   | ADP-ribosylation facto I    | 25 | -0.97557  | -1.07234 | -0.98162 | -0.81932 | -0.94012 | 9.712153 | 95.79379 | 1.45E-06 | 2.59E-05 | 5 |
| 55661_at  | 55661  | ENSG000001DXD27    | DEAD (Asp-Glu-Ala-Asp I     | 9  | -0.92983  | -1.05843 | -0.93232 | -0.92713 | -0.95403 | 9.636762 | 100.3143 | 1.22E-06 | 2.34E-05 | 5 |
| 23423_at  | 23423  | ENSG000001TMED3    | transmemt Secreted I        | 44 | -0.93677  | -1.05625 | -0.94087 | -0.91943 | -1.00399 | 9.655495 | 107.0403 | 9.65E-07 | 2.03E-05 | 5 |
| 203569_at | 203569 | ENSG000001PAGE2    | P antigen family, mem I     | 14 | -5.36258  | -4.82582 | -4.58679 | -3.28906 | -2.50333 | 7.03622  | 840.7522 | 4.81E-10 | 9.95E-07 | 4 |
| 116441_at | 116441 | ENSG000001TM4SF18  | transmembrane 4 L six I     | 19 | -5.31755  | -4.84821 | -4.60713 | -3.24702 | -2.5953  | 7.226994 | 544.0442 | 2.41E-09 | 1.03E-06 | 4 |
| 6285_at   | 6285   | ENSG000001S100B    | S100 calcium binding f I    | 30 | -5.24176  | -4.69892 | -4.1418  | -3.45934 | -3.14956 | 7.122012 | 63.61722 | 6.38E-06 | 7.19E-05 | 4 |
| 3117_at   | 3117   | NA HLA-DQA1        | major histc Secreted I      | 20 | -4.87158  | -4.87171 | -4.54274 | -3.36434 | -3.18153 | 7.046732 | 115.8294 | 7.24E-07 | 1.68E-05 | 4 |
| 84466_at  | 84466  | ENSG000001MEGF10   | multiple EC Secreted I      | 11 | -3.99526  | -4.35665 | -4.007   | -3.43008 | -2.8035  | 5.719659 | 358.2958 | 1.13E-08 | 1.68E-06 | 4 |
| 158511_at | 158511 | ENSG000001CSAG61   | chondrosarcoma assoc I      | 10 | -4.51401  | -4.54995 | -3.76546 | -2.97313 | -2.58177 | 7.562638 | 603.287  | 1.65E-09 | 9.95E-07 | 4 |
| 5354_at   | 5354   | ENSG000001PLP1     | proteolipid protein 1 I     | 54 | -4.43947  | -4.22923 | -3.9722  | -3.18204 | -2.62556 | 6.962186 | 160.3306 | 2.20E-07 | 7.98E-06 | 4 |
| 6347_at   | 6347   | ENSG000001CCL2     | chemokine kinase I          | 10 | -4.82897  | -4.45775 | -3.9223  | -3.02043 | -2.80595 | 9.384196 | 101.6312 | 1.17E-06 | 2.27E-05 | 4 |
| 3119_at   | 3119   | NA HLA-DQB1        | major histocompatibili I    | 14 | -4.98824  | -4.72096 | -3.93627 | -3.13695 | -2.8109  | 8.45407  | 165.9255 | 1.94E-07 | 7.40E-06 | 4 |
| 4100_at   | 4100   | ENSG000001MAGEA1   | melanoma antigen fan I      | 11 | -3.46021  | -4.66558 | -2.79311 | -2.97764 | -2.74696 | 6.295345 | 356.9118 | 1.15E-08 | 1.68E-06 | 4 |
| 4111_at   | 4111   | ENSG000001MAGEA12  | melanoma antigen fan I      | 11 | -4.56583  | -4.92978 | -3.77678 | -2.84462 | -1.81477 | 7.685204 | 1089.867 | 1.84E-10 | 9.95E-07 | 4 |
| 3212_at   | 3212   | ENSG000001HOXB2    | homeobox B2 I               | 11 | -4.89682  | -5.08407 | -3.32098 | -2.74303 | -2.02772 | 7.653748 | 744.6449 | 7.54E-10 | 9.95E-07 | 4 |
| 12_at     | 12     | ENSG000001SERPINA3 | serpin pept Secreted I      | 21 | -4.50926  | -4.11924 | -4.3702  | -2.77419 | -1.8558  | 6.753475 | 699.4271 | 9.52E-10 | 9.95E-07 | 4 |
| 83604_at  | 83604  | ENSG000001TMEM47   | transmembrane protei I      | 22 | -4.34235  | -3.98795 | -3.98822 | -3.01802 | -2.51348 | 5.96149  | 84.42446 | 2.29E-06 | 3.58E-05 | 4 |
| 10584_at  | 10584  | ENSG000001COLEC10  | collectin su Secreted I     | 11 | -4.5527   | -3.90844 | -4.05131 | -3.13717 | -2.31969 | 6.735764 | 272.9058 | 3.10E-08 | 2.60E-06 | 4 |
| 23475_at  | 23475  | ENSG000001QPR7     | quinolinate phosphoril I    | 22 | -4.28167  | -4.31095 | -3.94751 | -2.81114 | -2.27678 | 9.032904 | 424.0856 | 6.07E-09 | 1.23E-06 | 4 |
| 5445_at   | 5445   | ENSG000001PON2     | paraoxona: Secreted I       | 31 | -3.93863  | -4.47105 | -3.66417 | -2.87486 | -2.20584 | 7.558073 | 771.7769 | 6.61E-10 | 9.95E-07 | 4 |
| 9122_at   | 9122   | ENSG000001SLC16A4  | solute carri transporte I   | 41 | -3.97311  | -4.31053 | -3.8431  | -2.81556 | -2.33818 | 6.53604  | 531.0189 | 2.64E-09 | 1.03E-06 | 4 |
| 6999_at   | 6999   | NA TDO2            | tryptophan 2,3-dioxyg. I    | 11 | -4.4734   | -3.97539 | -3.64794 | -2.68227 | -2.3925  | 8.441573 | 78.09946 | 3.04E-06 | 4.32E-05 | 4 |
| 30848_at  | 30848  | ENSG000001CTAG2    | cancer/testis antigen 2 I   | 29 | -4.07908  | -4.07492 | -3.67162 | -2.79312 | -2.51034 | 7.265498 | 526.082  | 2.73E-09 | 1.03E-06 | 4 |
| 6678_at   | 6678   | ENSG000001SPARC    | secreted pr Secreted I      | 83 | -4.19764  | -4.10968 | -3.5322  | -2.66013 | -2.41039 | 8.886384 | 435.7218 | 5.49E-09 | 1.23E-06 | 4 |
| 7857_at   | 7857   | ENSG000001SCG2     | secretograi Secreted I      | 11 | -4.07419  | -4.29436 | -3.55348 | -2.63385 | -2.39153 | 6.424474 | 673.3417 | 1.10E-09 | 9.95E-07 | 4 |
| 23532_at  | 23532  | ENSG000001PRAME    | preferentially expresse I   | 11 | -4.03309  | -4.0192  | -3.83762 | -2.95326 | -2.72739 | 7.037454 | 602.868  | 1.65E-09 | 9.95E-07 | 4 |
| 4494_at   | 4494   | ENSG000001MT1F     | metallothionein 1F I        | 21 | -3.92949  | -3.61608 | -3.97064 | -2.7894  | -2.38958 | 8.642677 | 327.9783 | 1.57E-08 | 1.80E-06 | 4 |
| 10631_at  | 10631  | ENSG000001POSTN    | periostin, c Secreted I     | 43 | -3.96967  | -4.01158 | -3.8677  | -2.86588 | -2.27817 | 7.067247 | 53.50007 | 1.19E-05 | 0.000112 | 4 |
| 51299_at  | 51299  | ENSG000001NRN1     | neuritin 1 I                | 17 | -4.10398  | -3.53514 | -3.5585  | -2.89239 | -2.35589 | 6.941634 | 481.3176 | 3.80E-09 | 1.07E-06 | 4 |
| 25927_at  | 25927  | ENSG000001CNRIP1   | cannabinoid receptor I      | 20 | -3.93178  | -3.80747 | -3.45463 | -2.68426 | -2.28203 | 6.943155 | 330.3575 | 1.53E-08 | 1.80E-06 | 4 |
| 5738_at   | 5738   | ENSG000001PTGFRN   | prostaglandin F2 recep I    | 22 | -3.9505   | -3.72056 | -3.5     |          |          |          |          |          |          |   |

|           |        |                     |                               |    |          |          |          |          |          |          |          |          |          |   |
|-----------|--------|---------------------|-------------------------------|----|----------|----------|----------|----------|----------|----------|----------|----------|----------|---|
| 7164_at   | 7164   | ENSG000001TPD52L1   | tumor protein D52-like I      | 11 | -4.00348 | -3.60966 | -3.44987 | -2.48196 | -2.20807 | 9.501373 | 510.1638 | 3.06E-09 | 1.03E-06 | 4 |
| 716_at    | 716    | ENSG000001C1S       | complemer G-protein c I       | 11 | -3.38814 | -3.90118 | -3.35498 | -2.33531 | -2.02365 | 7.312891 | 739.2384 | 7.75E-10 | 9.95E-07 | 4 |
| 51438_at  | 51438  | ENSG000001MAGEC2    | melanoma antigen fan I        | 11 | -3.67833 | -3.90853 | -3.2188  | -2.34091 | -1.92013 | 10.00488 | 588.8813 | 1.80E-09 | 9.95E-07 | 4 |
| 85462_at  | 85462  | ENSG000001FHDC1     | FH2 domain containing I       | 11 | -3.20509 | -3.41941 | -3.28925 | -2.16683 | -1.85629 | 5.15736  | 64.93374 | 5.93E-06 | 6.85E-05 | 4 |
| 143662_at | 143662 | ENSG000001MUC15     | mucin 15, C secreted I        | 22 | -3.47883 | -3.40816 | -2.92362 | -2.46859 | -1.94232 | 6.692867 | 244.7475 | 4.63E-08 | 3.37E-06 | 4 |
| 6274_at   | 6274   | ENSG000001S100A3    | S100 calcium binding f I      | 11 | -3.48895 | -3.61788 | -3.11519 | -2.35893 | -2.1677  | 9.503112 | 426.4095 | 5.95E-09 | 1.23E-06 | 4 |
| 286077_at | 286077 | NA FAM83H           | family with sequence s I      | 22 | -3.18686 | -3.43333 | -3.18732 | -2.83323 | -2.09317 | 6.079016 | 578.3818 | 1.92E-09 | 9.95E-07 | 4 |
| 2191_at   | 2191   | ENSG000001FAP       | fibroblast a peptidase I      | 9  | -3.01506 | -3.60764 | -3.62459 | -2.79202 | -1.98562 | 6.413991 | 482.337  | 3.77E-09 | 1.07E-06 | 4 |
| 282969_at | 282969 | ENSG000001C10orf125 | chromosome 10 open I          | 22 | -3.28518 | -3.29723 | -3.1115  | -2.59163 | -2.53649 | 6.404934 | 603.2981 | 1.65E-09 | 9.95E-07 | 4 |
| 54_at     | 54     | ENSG000001ACP5      | acid phosph Secreted I        | 11 | -3.58778 | -3.21326 | -3.61996 | -2.76319 | -2.46371 | 7.989197 | 422.3849 | 6.16E-09 | 1.23E-06 | 4 |
| 5168_at   | 5168   | ENSG000001ENPP2     | ectonucleo Secreted I         | 42 | -3.36284 | -3.74998 | -3.32054 | -2.7346  | -2.36202 | 6.763176 | 234.7458 | 5.40E-08 | 3.74E-06 | 4 |
| 6566_at   | 6566   | ENSG000001SLC16A1   | solute carrier transport I    | 21 | -3.45036 | -3.4765  | -3.4386  | -2.51018 | -2.18793 | 5.564863 | 573.6902 | 1.98E-09 | 9.95E-07 | 4 |
| 2995_at   | 2995   | ENSG000001GYPC      | glycophorin C (Gerbi) I       | 11 | -3.66683 | -3.61749 | -3.38947 | -2.53244 | -2.18352 | 9.122462 | 503.1325 | 3.23E-09 | 1.03E-06 | 4 |
| 60681_at  | 60681  | NA FKBP10           | FK506 bind Secreted I         | 54 | -3.67604 | -3.53306 | -3.47477 | -2.61212 | -2.21741 | 6.343399 | 481.3616 | 3.80E-09 | 1.07E-06 | 4 |
| 79750_at  | 79750  | ENSG000001ZNF385D   | zinc finger protein 385 I     | 10 | -1.45986 | -1.75071 | -2.6268  | -2.34867 | -2.39309 | 4.591413 | 46.60519 | 1.95E-05 | 0.000161 | 3 |
| 54914_at  | 54914  | ENSG000001KIAA1797  | KIAA1797 Secreted I           | 9  | -1.93723 | -1.72794 | -2.96931 | -2.21058 | -1.97372 | 5.423539 | 108.1436 | 9.30E-07 | 1.99E-05 | 3 |
| 718_at    | 718    | ENSG000001C3        | complemer Secreted I          | 8  | -2.14613 | -3.07379 | -3.24293 | -2.54043 | -2.80377 | 5.5246   | 63.33937 | 6.49E-06 | 7.27E-05 | 3 |
| 7226_at   | 7226   | ENSG000001TRPM2     | transient r ion channe I      | 53 | -1.99442 | -2.68335 | -2.76411 | -2.514   | -2.50453 | 5.857943 | 577.2381 | 1.94E-09 | 9.95E-07 | 3 |
| 5003_at   | 5003   | ENSG000001SLC22A18A | solute carrier family 22 I    | 11 | -1.9517  | -2.81837 | -2.56653 | -2.52762 | -2.90078 | 6.221629 | 163.1834 | 2.06E-07 | 7.66E-06 | 3 |
| 79187_at  | 79187  | ENSG000001FSD1      | fibronectin type III and I    | 9  | -2.08488 | -2.5411  | -2.31896 | -1.937   | -2.42801 | 5.62336  | 167.6472 | 1.87E-07 | 7.25E-06 | 3 |
| 2705_at   | 2705   | ENSG000001GJB1      | gap junction transport I      | 11 | -1.86931 | -3.05461 | -2.03997 | -1.96898 | -2.51394 | 4.483405 | 100.0391 | 1.24E-06 | 2.36E-05 | 3 |
| 4507_at   | 4507   | ENSG000001MTAP      | methylthioadenosine f I       | 52 | -2.24074 | -2.82822 | -2.60549 | -2.47956 | -2.13093 | 5.515466 | 226.8724 | 6.12E-08 | 3.99E-06 | 3 |
| 6696_at   | 6696   | ENSG000001SPP1      | secreted pI Secreted I        | 65 | -1.82293 | -3.24987 | -2.34669 | -2.69406 | -2.2802  | 6.117446 | 275.0523 | 3.01E-08 | 2.57E-06 | 3 |
| 3772_at   | 3772   | ENSG000001KCNJ15    | potassium ion channe I        | 22 | -1.79762 | -2.99985 | -2.68201 | -2.78383 | -2.38385 | 6.097686 | 113.6512 | 7.75E-07 | 1.77E-05 | 3 |
| 3575_at   | 3575   | ENSG000001IL7R      | interleukin Secreted I        | 24 | -2.73795 | -3.0478  | -3.45815 | -2.63821 | -2.09495 | 6.3444   | 219.3535 | 6.94E-08 | 4.29E-06 | 3 |
| 256227_at | 256227 | ENSG000001STEAP1B   | STEAP family member I         | 9  | -2.74826 | -2.98763 | -3.33565 | -2.90063 | -2.67093 | 6.361822 | 512.5691 | 3.01E-09 | 1.03E-06 | 3 |
| 7412_at   | 7412   | ENSG000001VCAM1     | vascular cell adhesion I      | 22 | -2.92485 | -3.18049 | -4.15325 | -2.90998 | -2.09163 | 5.947766 | 29.53848 | 9.74E-05 | 0.000554 | 3 |
| 3221_at   | 3221   | ENSG000001HOXC4     | homeobox C4 I                 | 11 | -2.87728 | -3.82227 | -3.80792 | -2.58731 | -2.61719 | 5.900558 | 342.0932 | 1.34E-08 | 1.75E-06 | 3 |
| 1917_at   | 1917   | ENSG000001EEF1A2    | eukaryotic GTPase I           | 21 | -2.98811 | -2.50435 | -2.47835 | -2.51884 | -2.53788 | 6.078984 | 288.1536 | 2.53E-08 | 2.34E-06 | 3 |
| 10215_at  | 10215  | ENSG000001OLIG2     | oligodendrocyte lineag I      | 11 | -3.21031 | -2.87614 | -2.57531 | -2.66102 | -2.79605 | 5.432749 | 227.6233 | 6.05E-08 | 3.97E-06 | 3 |
| 125058_at | 125058 | ENSG000001TBC1D16   | TBC1 domain family, n I       | 11 | -2.84691 | -3.1895  | -2.30468 | -2.94007 | -2.54033 | 5.434133 | 168.124  | 1.85E-07 | 7.18E-06 | 3 |
| 644538_at | 644538 | ENSG000001CXorf69   | chromosome X open r I         | 22 | -3.20556 | -3.36634 | -2.49012 | -2.93342 | -2.32822 | 6.195802 | 106.0072 | 1.00E-06 | 2.08E-05 | 3 |
| 26227_at  | 26227  | ENSG000001PHGDH     | phosphogly transport I        | 11 | -3.25436 | -2.13522 | -2.56307 | -1.71233 | -1.86011 | 8.59982  | 280.0541 | 2.82E-08 | 2.48E-06 | 3 |
| 26471_at  | 26471  | ENSG000001NUPR1     | nuclear protein, trans I      | 10 | -3.38527 | -2.29056 | -2.74979 | -1.81099 | -2.25544 | 9.511766 | 129.6816 | 4.79E-07 | 1.29E-05 | 3 |
| 3823_at   | 3823   | ENSG000001KLRC3     | killer cell lectin-like rec I | 44 | -3.24964 | -2.78975 | -2.43379 | -2.19306 | -2.08437 | 5.214111 | 397.2669 | 7.73E-09 | 1.37E-06 | 3 |
| 1993_at   | 1993   | ENSG000001ELAVL2    | ELAV (embryonic) letha I      | 11 | -3.2743  | -2.45139 | -2.55602 | -2.58275 | -1.74687 | 4.797854 | 113.9235 | 7.69E-07 | 1.76E-05 | 3 |
| 3216_at   | 3216   | ENSG000001HOXB6     | homeobox B6 I                 | 11 | -3.00807 | -2.29815 | -2.40827 | -2.25408 | -1.75527 | 5.137776 | 103.7149 | 1.08E-06 | 2.19E-05 | 3 |
| 590_at    | 590    | ENSG000001BCHE      | butyrylchol Secreted I        | 22 | -3.13603 | -2.70548 | -2.34568 | -2.18584 | -1.59781 | 4.744528 | 152.28   | 2.66E-07 | 8.79E-06 | 3 |
| 4935_at   | 4935   | ENSG000001GPR143    | G protein-c G-protein c I     | 10 | -3.5741  | -2.48754 | -3.22022 | -2.56701 | -2.24125 | 6.782382 | 918.4749 | 3.46E-10 | 9.95E-07 | 3 |
| 715_at    | 715    | ENSG000001C1R       | complemer peptidase I         | 33 | -3.22219 | -3.14032 | -2.81588 | -2.23512 | -2.04708 | 8.291961 | 500.923  | 3.28E-09 | 1.03E-06 | 3 |
| 26577_at  | 26577  | ENSG000001PCOLCE2   | procollagen Secreted I        | 11 | -3.22287 | -2.8251  | -3.05705 | -2.38296 | -1.95114 | 6.626675 | 346.4603 | 1.28E-08 | 1.73E-06 | 3 |
| 1029_at   | 1029   | ENSG000001CDKN2A    | cyclin-dependent kinas I      | 30 | -3.22665 | -2.89244 | -2.78875 | -2.21835 | -2.12061 | 6.272492 | 453.3074 | 4.75E-09 | 1.23E-06 | 3 |
| 7984_at   | 7984   | ENSG000001ARHGEF5   | Rho guanine nucleotid I       | 11 | -3.21171 | -2.82716 | -3.01095 | -2.24755 | -2.21604 | 5.520131 | 320.4691 | 1.71E-08 | 1.89E-06 | 3 |
| 1278_at   | 1278   | ENSG000001COL1A2    | collagen, ty Secreted I       | 58 | -2.62394 | -2.52951 | -3.2338  | -2.41823 | -2.40902 | 5.421013 | 50.11832 | 1.50E-05 | 0.000134 | 3 |
| 646962_at | 646962 | ENSG000001HRCT1     | histidine rich carboxyl I     | 11 | -2.853   | -2.55882 | -3.29647 | -2.13127 | -1.9725  | 5.827507 | 138.8872 | 3.72E-07 | 1.07E-05 | 3 |
| 2297_at   | 2297   | NA FOXD1            | forkhead box D1 I             | 11 | -2.96004 | -2.84753 | -3.19721 | -2.08733 | -2.11592 | 5.856032 | 71.06202 | 4.28E-06 | 5.42E-05 | 3 |
| 100128108 | 1E+08  | NA LOC100128108     | hypothetical LOC10012 I       | 4  | -2.88193 | -2.7016  | -2.89941 | -2.6523  | -1.6506  | 4.871811 | 172.3992 | 1.68E-07 | 6.87E-06 | 3 |
| 115557_at | 115557 | ENSG000001ARHGEF25  | Rho guanine nucleotid I       | 10 | -2.84698 | -2.46863 | -2.6941  | -2.72677 | -2.12586 | 5.002455 | 181.7066 | 1.39E-07 | 6.18E-06 | 3 |
| 91614_at  | 91614  | ENSG000001DEPDC7    | DEP domain containing I       | 20 | -3.08528 | -2.67443 | -2.9875  | -2.55498 | -2.31308 | 5.143888 | 525.5749 | 2.74E-09 | 1.03E-06 | 3 |
| 51279_at  | 51279  | ENSG000001C1RL      | complemer peptidase I         | 11 | -3.98199 | -3.42141 | -2.73212 | -2.34194 | -1.81799 | 6.531281 | 265.9188 | 3.41E-08 | 2.79E-06 | 3 |
| 3371_at   | 3371   | ENSG000001TNC       | tenascin C Secreted I         | 39 | -3.23334 | -3.35404 | -2.57187 | -2.11442 | -1.73922 | 9.878307 | 608.404  | 1.60E-09 | 9.95E-07 | 3 |
| 5270_at   | 5270   | ENSG000001SERPINE2  | serpin pept Secreted I        | 66 | -3.52292 | -3.12937 | -2.71898 | -2.09457 | -1.78262 | 10.24514 | 102.7429 | 1.12E-06 | 2.22E-05 | 3 |
| 4314_at   | 4314   | ENSG000001MMP3      | matrix met peptidase I        | 11 | -2.74282 | -3.53656 | -3.17319 | -2.15234 | -1.41829 | 9.254825 | 108.745  | 9.11E-07 | 1.98E-05 | 3 |
| 7364_at   | 7364   | ENSG000001UGT2B7    | UDP glucuronosyltrans I       | 8  | -3.02757 | -3.74997 | -2.3595  | -2.67088 | -1.77586 | 5.457345 | 146.3975 | 6.50E-09 | 1.25E-06 | 3 |
| 29887_at  | 29887  | ENSG000001SNX10     | sorting nexin 10 I            | 53 | -2.61193 | -3.14998 | -2.34705 | -2.45818 | -1.80371 | 5.685712 | 99.11241 | 1.28E-06 | 2.39E-05 | 3 |
| 54898_at  | 54898  | ENSG000001ELOVL2    | ELOVL fatty acid elong I      | 11 | -2.77423 | -3.26304 | -2.19711 | -2.53116 | -2.28594 | 4.553047 | 180.3659 | 1.43E-07 | 6.21E-06 | 3 |
| 55711_at  | 55711  | ENSG000001FAR2      | fatty acyl CoA reductas I     | 10 | -2.69857 | -3.11619 | -2.85762 | -2.61021 | -2.15333 | 5.212723 | 244.3431 | 4.66E-08 | 3.38E-06 | 3 |
| 79962_at  | 79962  | ENSG000001DNAJC22   | DnaJ (Hsp40) homolog I        | 11 | -2.69238 | -3.44209 | -2.82502 | -2.565   | -2.27334 | 5.45213  | 505.1577 | 3.18E-09 | 1.03E-06 | 3 |
| 683_at    | 683    | ENSG000001BST1      | bone marr Secreted I          | 11 | -3.12306 | -3.24467 | -2.07986 | -1.7648  | -1.70232 | 5.667788 | 474.3853 | 4.01E-09 | 1.09E-06 | 3 |
| 3122_at   | 3122   | NA HLA-DRA          | major histc Secreted I        | 31 | -3.01572 | -2.78257 | -1.99968 | -1.73166 | -1.19825 | 11.17401 | 294.8248 | 2.33E-08 | 2.20E-06 | 3 |
| 10265_at  | 10265  | ENSG000001IRX5      | iroquois homeobox 5 I         | 44 | -2.79197 | -2.64504 | -1.96226 | -2.03197 | -1.54939 | 5.104658 | 148.1495 | 2.94E-07 | 9.35E-06 | 3 |
| 7022_at   | 7022   | ENSG000001TFAP2C    | transcription factor AP I     | 21 | -2.96733 | -2.85311 | -2.00775 | -2.06064 | -1.5334  | 6.906434 | 103.2781 | 1.10E-06 | 2.20E-05 | 3 |
| 55076_at  | 55076  | ENSG000001TMEM45A   | transmembrane protei I        | 11 | -3.21253 | -2.71972 | -2.45979 | -1.61781 | -1.56224 | 8.399799 | 368.353  | 1.02E-08 | 1.60E-06 | 3 |
| 3161_at   | 3161   | ENSG000001HMMR      | hyaluronan-mediated I         | 43 | -2.74089 | -2.98597 | -2.50552 | -1.88952 | -1.37905 | 7.501086 | 249.4276 | 4.32E-08 | 3.23E-06 | 3 |
| 1290_at   | 1290   | ENSG000001COL5A2    | collagen, ty Secreted I       | 59 | -2.69807 | -2.6903  | -2.6619  | -1.90787 | -1.55579 | 5.184875 | 220.0761 | 6.85E-08 | 4.27E-06 | 3 |
| 3134_at   | 3134   | NA HLA-F            | major histocompatibili I      | 52 | -2.89232 | -2.72669 | -2.51477 | -2.04221 | -1.55193 | 7.177888 | 320.9446 | 1.70E-08 | 1.89E-06 | 3 |
| 79411_at  | 79411  | ENSG000001GLB1L     | galactosidase, beta 1-li I    | 11 | -2.77398 | -2.73042 | -2.82337 | -1.84317 | -1.91947 | 5.94515  | 140.4012 | 3.58E-07 | 1.05E-05 | 3 |
| 91107_at  | 91107  | ENSG000001TRIM47    | tripartite motif contain I    | 11 | -2.655   | -2.594   | -2.51735 | -1.87204 | -1.79964 | 7.145169 | 316.8305 | 1.79E-08 | 1.93E-06 | 3 |
| 2040_at   | 2040   | ENSG000001STOM      | stomatin I                    | 54 | -2.57119 | -2.47325 | -2.58384 | -1.97699 | -1.83998 | 6.563393 | 286.9158 | 2.58E-08 | 2.34E-06 | 3 |
| 972_at    | 972    | ENSG000001CD74      | CD74 molecule, major I        | 54 | -2.83805 | -2.89796 | -2.28481 | -2.00185 | -1.83317 | 8.546987 | 15       |          |          |   |

|           |        |                    |                          |    |          |          |          |          |          |          |          |          |          |   |
|-----------|--------|--------------------|--------------------------|----|----------|----------|----------|----------|----------|----------|----------|----------|----------|---|
| 26137_at  | 26137  | ENSG000001ZBTB20   | zinc finger and BTB do   | 20 | -1.90164 | -1.93386 | -1.95191 | -1.6294  | -0.53087 | 6.715315 | 199.3232 | 9.87E-08 | 5.18E-06 | 2 |
| 55790_at  | 55790  | ENSG000001CSGALNAC | chondroitin sulfate N-ε  | 33 | -1.82526 | -2.00152 | -1.85312 | -1.28603 | -0.92902 | 3.955767 | 190.7975 | 1.16E-07 | 5.53E-06 | 2 |
| 10161_at  | 10161  | ENSG000001LPAR6    | lymphosphor G-protein c  | 11 | -2.00352 | -1.83871 | -1.76595 | -1.6055  | -0.98852 | 4.231529 | 90.81154 | 1.76E-06 | 2.97E-05 | 2 |
| 4435_at   | 4435   | ENSG000001CITED1   | Cbp/p300-interacting f   | 11 | -2.04532 | -1.82801 | -2.10184 | -1.03398 | -0.45176 | 5.500107 | 49.39388 | 1.58E-05 | 0.000139 | 2 |
| 25805_at  | 25805  | ENSG000001BAMBI    | BMP and activin mem      | 11 | -2.23927 | -2.04717 | -1.94194 | -1.18937 | -0.83865 | 7.968488 | 61.65388 | 7.15E-06 | 7.76E-05 | 2 |
| 1836_at   | 1836   | ENSG000001SLC26A2  | solute carri transporter | 44 | -2.22537 | -2.02457 | -1.96185 | -1.43462 | -0.80602 | 8.054622 | 88.65391 | 1.92E-06 | 3.13E-05 | 2 |
| 54795_at  | 54795  | ENSG000001TRPM4    | transient r-ion channe   | 9  | -2.0723  | -0.92389 | -2.03759 | -1.27486 | -1.64268 | 5.838572 | 57.46302 | 9.21E-06 | 9.30E-05 | 2 |
| 6094_at   | 6094   | ENSG000001ROM1     | retinal outer segment    | 10 | -1.87182 | -1.28668 | -2.08406 | -0.86438 | -1.0331  | 4.624642 | 39.50227 | 3.51E-05 | 0.000252 | 2 |
| 51339_at  | 51339  | ENSG000001DACT1    | dapper, antagonist of    | 22 | -1.6873  | -1.28048 | -2.02622 | -1.15464 | -1.23939 | 4.783325 | 62.67483 | 6.74E-06 | 7.47E-05 | 2 |
| 126969_at | 126969 | ENSG000001SLC44A3  | solute carrier family 4  | 21 | -1.8668  | -1.24751 | -1.93046 | -1.43978 | -1.43693 | 4.362345 | 212.2564 | 7.83E-08 | 4.56E-06 | 2 |
| 139628_at | 139628 | ENSG000001FOXR2    | forkhead box R2          | 11 | -1.96567 | -1.4208  | -1.80626 | -1.57137 | -1.30935 | 4.921968 | 76.46942 | 3.28E-06 | 4.55E-05 | 2 |
| 642852_at | 642852 | NA LOC642852       | hypothetical LOC6428     | 9  | -1.95459 | -1.51833 | -1.83879 | -1.34817 | -1.11114 | 7.417953 | 49.93977 | 1.52E-05 | 0.000135 | 2 |
| 340252_at | 340252 | ENSG000001ZNF680   | zinc finger protein 680  | 18 | -1.82621 | -1.27561 | -1.59671 | -1.56043 | -1.10252 | 4.284829 | 136.4397 | 3.97E-07 | 1.13E-05 | 2 |
| 23765_at  | 23765  | ENSG000001IL17RA   | interleukin 17 receptor  | 11 | -1.72507 | -1.39634 | -1.83924 | -1.71399 | -1.14301 | 5.460154 | 139.54   | 3.66E-07 | 1.07E-05 | 2 |
| 339230_at | 339230 | ENSG000001CCDC137  | coiled-coil domain con   | 11 | -1.764   | -1.18378 | -1.53751 | -1.26802 | -1.18716 | 8.035578 | 108.704  | 9.12E-07 | 1.98E-05 | 2 |
| 79798_at  | 79798  | ENSG000001ARMCS    | armadillo r-Secreted     | 33 | -1.73302 | -1.22296 | -1.40093 | -1.29778 | -1.3129  | 6.26748  | 198.437  | 1.00E-07 | 5.18E-06 | 2 |
| 25847_at  | 25847  | ENSG000001ANAPC13  | anaphase promoting c     | 20 | -1.48513 | -1.49788 | -1.51899 | -1.23195 | -1.18146 | 10.40936 | 181.1399 | 1.40E-07 | 6.20E-06 | 2 |
| 10079_at  | 10079  | ENSG000001ATP9A    | ATPase, cla transporter  | 21 | -1.3618  | -1.52203 | -1.47684 | -1.29474 | -1.28955 | 4.586538 | 200.0811 | 9.73E-08 | 5.17E-06 | 2 |
| 126321_at | 126321 | ENSG000001C19orf28 | chromosome 19 open       | 21 | -1.58552 | -1.42514 | -1.48647 | -1.23917 | -1.36623 | 7.812208 | 60.80257 | 7.51E-06 | 8.01E-05 | 2 |
| 4668_at   | 4668   | ENSG000001NAGA     | N-acetylgalactosamin     | 22 | -1.60401 | -1.56224 | -1.34332 | -1.23119 | -1.40882 | 7.110373 | 171.0593 | 1.73E-07 | 6.98E-06 | 2 |
| 57017_at  | 57017  | ENSG000001COQ9     | coenzyme Q9 homolog      | 11 | -1.48566 | -1.38589 | -1.70728 | -1.38205 | -1.56454 | 8.763579 | 155.0686 | 2.48E-07 | 8.42E-06 | 2 |
| 56521_at  | 56521  | ENSG000001DNAJC12  | DnaJ (Hsp40) homolog     | 21 | -1.43013 | -1.41609 | -1.56254 | -1.31071 | -1.42348 | 4.175493 | 222.3523 | 6.60E-08 | 4.12E-06 | 2 |
| 84080_at  | 84080  | ENSG000001C16orf48 | chromosome 16 open       | 11 | -1.41606 | -1.49505 | -1.57797 | -1.17839 | -1.4912  | 6.589886 | 71.73427 | 4.14E-06 | 5.30E-05 | 2 |
| 55734_at  | 55734  | ENSG000001ZFP64    | zinc finger protein 64   | 29 | -1.45899 | -1.52102 | -1.50418 | -1.50776 | -1.27395 | 5.883596 | 199.6288 | 9.81E-08 | 5.18E-06 | 2 |
| 359845_at | 359845 | NA FAM101B         | family with sequence     | 20 | -1.64597 | -1.40439 | -1.40758 | -1.45267 | -1.36181 | 5.072473 | 164.6206 | 1.99E-07 | 7.50E-06 | 2 |
| 8800_at   | 8800   | ENSG000001PEX11A   | peroxisomal biogenesi    | 11 | -1.55711 | -1.44049 | -1.47644 | -1.55592 | -1.50183 | 4.629651 | 168.6969 | 1.82E-07 | 7.13E-06 | 2 |
| 23321_at  | 23321  | ENSG000001TRIM2    | tripartite motif contain | 33 | -2.63022 | -2.5671  | -1.57994 | -1.49103 | -1.18371 | 7.74569  | 107.6163 | 9.47E-07 | 2.02E-05 | 2 |
| 2634_at   | 2634   | ENSG000001GBP2     | guanylate t-GTPase       | 10 | -2.65392 | -2.85977 | -1.51335 | -1.6354  | -1.2023  | 7.006194 | 217.3147 | 7.18E-08 | 4.33E-06 | 2 |
| 133383_at | 133383 | ENSG000001C5orf35  | chromosome 5 open r      | 10 | -2.53533 | -2.25426 | -1.24267 | -1.38707 | -0.69576 | 5.547428 | 60.28698 | 7.75E-06 | 8.20E-05 | 2 |
| 168374_at | 168374 | ENSG000001ZNF92    | zinc finger protein 92   | 11 | -2.89375 | -2.07989 | -1.60463 | -1.55579 | -0.53764 | 5.12574  | 223.7779 | 6.44E-08 | 4.10E-06 | 2 |
| 26167_at  | 26167  | ENSG000001PCDH85   | protocadherin beta 5     | 11 | -2.7333  | -2.17033 | -1.74363 | -1.02537 | -1.093   | 5.514084 | 91.54664 | 1.71E-06 | 2.91E-05 | 2 |
| 2934_at   | 2934   | ENSG000001GSN      | gelsolin-Secreted        | 11 | -2.82283 | -2.21098 | -1.31548 | -1.33553 | -1.35613 | 8.894913 | 249.0164 | 4.34E-08 | 3.24E-06 | 2 |
| 60489_at  | 60489  | ENSG000001APOBEC3G | apolipoprotein B mRN     | 10 | -2.47434 | -1.65209 | -0.67725 | -1.22325 | -1.24456 | 5.329254 | 158.9277 | 0.000802 | 0.002999 | 2 |
| 25797_at  | 25797  | ENSG000001QPCT     | glutaminy- peptidase     | 22 | -2.4307  | -2.23915 | -1.1159  | -1.46307 | -1.45499 | 6.025642 | 33.208   | 6.47E-05 | 0.000402 | 2 |
| 79912_at  | 79912  | ENSG000001PYROXD1  | pyridine nucleotide-di   | 7  | -2.32461 | -2.16779 | -1.00926 | -1.64835 | -1.09629 | 4.977667 | 347.0403 | 1.28E-08 | 1.73E-06 | 2 |
| 8544_at   | 8544   | ENSG000001PIR      | pirin (iron-binding nuc  | 6  | -2.21313 | -2.16427 | -0.83447 | -1.67858 | -1.3962  | 6.206497 | 198.4009 | 1.00E-07 | 5.18E-06 | 2 |
| 56130_at  | 56130  | ENSG000001PCDH86   | protocadherin beta 6     | 33 | -1.96639 | -1.6644  | -1.30084 | -1.3718  | -1.00059 | 4.262128 | 158.0341 | 2.32E-07 | 8.09E-06 | 2 |
| 83940_at  | 83940  | ENSG000001TATDN1   | TatD DNase domain co     | 4  | -1.99025 | -1.86956 | -1.42172 | -1.47453 | -0.87384 | 8.011442 | 96.00246 | 1.44E-06 | 2.58E-05 | 2 |
| 643911_at | 643911 | NA CRNDE           | colorectal neoplasia di  | 11 | -2.31747 | -1.876   | -1.11295 | -1.29942 | -0.77493 | 9.700557 | 144.893  | 3.19E-07 | 9.88E-06 | 2 |
| 6273_at   | 6273   | ENSG000001S100A2   | S100 calcium binding     | 10 | -2.29675 | -1.82168 | -1.1553  | -1.37665 | -1.22223 | 8.230224 | 208.6737 | 0.000322 | 0.001423 | 2 |
| 55329_at  | 55329  | ENSG000001MNS1     | meiosis-specific nucle   | 11 | -1.8985  | -1.90557 | -1.07092 | -1.54809 | -0.62979 | 6.215221 | 143.6644 | 3.29E-07 | 9.97E-06 | 2 |
| 64168_at  | 64168  | ENSG000001NECAB1   | N-terminal EF-hand cal   | 22 | -1.68978 | -2.14787 | -0.89036 | -1.81714 | -0.80856 | 3.990551 | 38.4942  | 3.84E-05 | 0.00027  | 2 |
| 145389_at | 145389 | ENSG000001SLC38A6  | solute carrier family 3  | 9  | -1.97174 | -2.49934 | -1.37334 | -1.45906 | -0.79734 | 6.622388 | 194.8725 | 1.07E-07 | 5.35E-06 | 2 |
| 9582_at   | 9582   | ENSG000001APOBEC3B | apolipoprotein B mRN     | 19 | -2.16799 | -2.26306 | -1.49642 | -1.68638 | -0.94711 | 10.04466 | 344.0133 | 1.32E-08 | 1.75E-06 | 2 |
| 729967_at | 729967 | ENSG000001MORN2    | MORN repeat containi     | 10 | -1.84131 | -1.64223 | -1.0544  | -1.06487 | -1.19791 | 6.970463 | 127.0673 | 5.16E-07 | 1.35E-05 | 2 |
| 2109_at   | 2109   | ENSG000001ETFB     | electron-transfer-flavo  | 7  | -1.76967 | -1.71322 | -1.06294 | -1.00039 | -1.00195 | 9.003328 | 175.4083 | 1.58E-07 | 6.66E-06 | 2 |
| 10553_at  | 10553  | ENSG000001HTATIP2  | HIV-1 Tat interactive p  | 33 | -1.72674 | -1.70683 | -1.24484 | -1.07641 | -1.07875 | 8.981088 | 195.6955 | 1.06E-07 | 5.33E-06 | 2 |
| 151194_at | 151194 | ENSG000001METTL21A | methyltransferase like   | 9  | -1.57631 | -1.66035 | -1.00891 | -1.31501 | -1.31421 | 7.265175 | 51.91055 | 1.33E-05 | 0.000122 | 2 |
| 64081_at  | 64081  | ENSG000001PBLD     | phenazine biosynthesi    | 20 | -1.55911 | -1.70379 | -1.06543 | -1.46831 | -1.16409 | 4.811476 | 78.547   | 2.98E-06 | 4.25E-05 | 2 |
| 51313_at  | 51313  | ENSG000001FAM198B  | family with Secreted     | 55 | -1.60462 | -2.0348  | -1.14537 | -1.29582 | -1.05376 | 3.813073 | 64.94263 | 5.93E-06 | 6.85E-05 | 2 |
| 55502_at  | 55502  | ENSG000001HES6     | hairy and enhancer of    | 11 | -1.50625 | -1.71113 | -1.23673 | -1.35714 | -1.02044 | 7.332206 | 99.54326 | 1.26E-06 | 2.38E-05 | 2 |
| 123920_at | 123920 | ENSG000001CMTM3    | CKLF-like MARVEL tran    | 22 | -1.38542 | -1.68465 | -1.21494 | -1.15561 | -1.09472 | 7.562734 | 88.84855 | 1.90E-06 | 3.11E-05 | 2 |
| 114793_at | 114793 | ENSG000001FMNL2    | formin-like 2            | 22 | -1.51143 | -1.8537  | -1.29373 | -1.14659 | -1.08433 | 7.106827 | 104.6657 | 1.05E-06 | 2.13E-05 | 2 |
| 1728_at   | 1728   | ENSG000001NQO1     | NAD(P)H dehydrogena      | 22 | -1.71513 | -1.49142 | -1.23242 | -1.14768 | -1.00928 | 9.981539 | 199.0588 | 9.92E-08 | 5.18E-06 | 2 |
| 64172_at  | 64172  | ENSG000001OSGPEL1  | O-sialoglycyl peptidase  | 11 | -1.64495 | -1.58195 | -1.32964 | -1.16045 | -0.8937  | 7.875318 | 91.77351 | 1.69E-06 | 2.89E-05 | 2 |
| 9488_at   | 9488   | ENSG000001PIGB     | phosphatidylinositol gl  | 9  | -1.58913 | -1.55369 | -1.41485 | -1.25334 | -0.97665 | 7.338245 | 171.1859 | 1.73E-07 | 6.98E-06 | 2 |
| 115209_at | 115209 | ENSG000001OMA1     | OMA1 horr peptidase      | 11 | -1.94092 | -1.44182 | -1.47568 | -1.11995 | -0.92338 | 8.215374 | 90.9001  | 1.75E-06 | 2.96E-05 | 2 |
| 54101_at  | 54101  | ENSG000001RIPK4    | receptor-in kinase       | 33 | -1.8322  | -1.45784 | -1.41086 | -1.34477 | -1.15151 | 5.186712 | 141.1982 | 3.50E-07 | 1.04E-05 | 2 |
| 148022_at | 148022 | ENSG000001TICAM1   | toll-like receptor adapt | 11 | -1.79911 | -1.56219 | -1.52084 | -1.24537 | -1.09179 | 6.211608 | 40.81215 | 3.13E-05 | 0.000231 | 2 |
| 23189_at  | 23189  | ENSG000001KANK1    | KN motif and ankyrin r   | 18 | -1.77171 | -1.85829 | -1.51826 | -1.11947 | -1.10958 | 6.94597  | 86.80244 | 2.07E-06 | 3.33E-05 | 2 |
| 2585_at   | 2585   | ENSG000001GALK2    | galactokinase            | 31 | -1.78064 | -1.79593 | -1.34392 | -1.23523 | -1.17545 | 7.35387  | 170.457  | 1.75E-07 | 7.02E-06 | 2 |
| 55909_at  | 55909  | ENSG000001BIN3     | bridging integrator 3    | 22 | -1.68268 | -1.81592 | -1.47719 | -1.20656 | -1.27403 | 6.263959 | 162.5267 | 2.09E-07 | 7.73E-06 | 2 |
| 85476_at  | 85476  | ENSG000001GFM1     | G elongatic GTPase       | 19 | -1.76736 | -1.69903 | -1.34124 | -1.26711 | -0.88607 | 8.321067 | 183.2253 | 1.35E-07 | 6.10E-06 | 2 |
| 11341_at  | 11341  | ENSG000001SCR61    | stimulator-Secreted      | 21 | -1.71587 | -1.80803 | -1.41252 | -1.10168 | -1.00706 | 3.898907 | 83.06981 | 2.43E-06 | 3.69E-05 | 2 |
| 79070_at  | 79070  | ENSG000001KDEL1    | KDEL (Lys-) Secreted     | 7  | -1.66569 | -1.82985 | -1.41259 | -1.21847 | -0.93543 | 5.917501 | 33.7599  | 6.11E-05 | 0.000384 | 2 |
| 8460_at   | 8460   | ENSG000001TPST1    | tyrosylprotein sulfotra  | 11 | -1.71044 | -1.83556 | -1.4564  | -1.18617 | -0.91253 | 7.130963 | 255.7313 | 3.94E-08 | 3.05E-06 | 2 |
| 11158_at  | 11158  | ENSG000001RABL2B   | RAB, memt GTPase         | 3  | -2.12948 | -1.89624 | -1.53209 | -1.04002 | -1.62932 | 7.710227 | 131.2688 | 4.58E-07 | 1.25E-05 | 2 |
| 1573_at   | 1573   | ENSG000001CYP2J2   | cytochrome P450, fam     | 11 | -1.77704 | -1.65695 | -1.56932 | -1.0181  | -1.44945 | 5.021313 | 42.59215 | 2.69E-05 | 0.000206 | 2 |
| 55741_at  | 55741  | ENSG000001EDEM2    | ER degrada-Secreted      | 11 | -1.84182 | -1.42023 | -1.54221 | -1.17937 | -1.66871 | 8.062831 | 70.88146 | 4.32E-06 | 5.43E-05 | 2 |
| 11078_at  | 11078  | ENSG000001TRIOBP   | TRIO and F-actin bindi   | 54 | -1.89106 | -1.52065 | -1.43112 |          |          |          |          |          |          |   |

|           |        |                    |                          |    |          |          |          |          |          |          |          |          |          |   |
|-----------|--------|--------------------|--------------------------|----|----------|----------|----------|----------|----------|----------|----------|----------|----------|---|
| 128061_at | 128061 | ENSG000001C1orf131 | chromosome 1 open r      | 29 | -1.95365 | -1.70017 | -1.69842 | -1.51492 | -1.33935 | 6.809351 | 111.5113 | 8.31E-07 | 1.85E-05 | 2 |
| 129138_at | 129138 | ENSG000001ANKRD54  | ankyrin repeat domain I  | 11 | -1.95892 | -1.84418 | -1.59181 | -1.48841 | -1.44842 | 7.04095  | 128.3578 | 4.97E-07 | 1.32E-05 | 2 |
| 54460_at  | 54460  | ENSG000001MRPS21   | mitochondr Secreted I    | 33 | -1.76987 | -1.74202 | -1.62904 | -1.43945 | -1.30081 | 10.17811 | 160.5233 | 3.68E-08 | 2.93E-06 | 2 |
| 95681_at  | 95681  | ENSG000001TSGA14   | testis specific, 14 I    | 54 | -1.85681 | -1.68839 | -1.71781 | -1.39804 | -1.11159 | 5.880431 | 287.388  | 2.56E-08 | 2.34E-06 | 2 |
| 10721_at  | 10721  | ENSG000001POLQ     | polymerase (DNA dire     | 11 | -1.94882 | -1.71336 | -1.61582 | -1.45335 | -1.18694 | 7.375283 | 121.4147 | 6.09E-07 | 1.51E-05 | 2 |
| 25825_at  | 25825  | ENSG000001BACE2    | beta-site A peptidase I  | 33 | -1.74622 | -1.97552 | -1.69926 | -1.51916 | -1.33242 | 8.196928 | 186.2143 | 1.27E-07 | 5.87E-06 | 2 |
| 4715_at   | 4715   | ENSG000001NDUFB9   | NADH dehydrogenase I     | 16 | -1.83973 | -2.02776 | -1.79255 | -1.57493 | -1.19537 | 11.3004  | 278.7101 | 2.87E-08 | 2.51E-06 | 2 |
| 23336_at  | 23336  | ENSG000001SYNM     | synemin, intermediate I  | 22 | -1.8836  | -1.97018 | -1.81742 | -1.62449 | -1.1927  | 7.672045 | 50.40652 | 1.47E-05 | 0.000131 | 2 |
| 10763_at  | 10763  | ENSG000001NES      | nestin I                 | 22 | -2.67066 | -2.39205 | -2.27652 | -1.13386 | -1.50606 | 5.117419 | 165.6327 | 1.95E-07 | 7.40E-06 | 2 |
| 55287_at  | 55287  | ENSG000001TMEM40   | transmembrane protei     | 16 | -3.16098 | -1.62866 | -2.29373 | -1.40307 | -1.64872 | 4.481565 | 227.9407 | 6.02E-08 | 3.97E-06 | 2 |
| 26157_at  | 26157  | ENSG000001GIMAP2   | GTPase, IMAP family n    | 11 | -2.55828 | -1.87257 | -2.06711 | -1.97889 | -1.40301 | 5.097608 | 55.14976 | 1.07E-05 | 0.000104 | 2 |
| 90768_at  | 90768  | NA MGC4580C        | hypothetical LOC90768    | 11 | -2.86524 | -1.92037 | -2.24241 | -1.88573 | -1.31509 | 4.446809 | 149.297  | 2.86E-07 | 9.19E-06 | 2 |
| 55039_at  | 55039  | ENSG000001TRMT12   | tRNA methyltransferas    | 11 | -2.64767 | -1.92188 | -2.562   | -1.76903 | -1.38422 | 7.036288 | 434.0096 | 5.57E-09 | 1.23E-06 | 2 |
| 1942_at   | 1942   | ENSG000001EFNA1    | ephriin-A1 Secreted I    | 22 | -2.58481 | -1.96946 | -2.8369  | -1.78956 | -1.56456 | 5.152198 | 174.3929 | 1.61E-07 | 6.78E-06 | 2 |
| 57545_at  | 57545  | ENSG000001CC2D2A   | coiled-coil and C2 dom   | 11 | -2.50924 | -1.64364 | -2.32261 | -1.53087 | -1.34064 | 6.5405   | 294.726  | 2.33E-08 | 2.20E-06 | 2 |
| 1593_at   | 1593   | ENSG000001CYP27A1  | cytochrome P450, fam     | 11 | -2.23586 | -1.66727 | -2.48433 | -1.57804 | -1.50582 | 7.67849  | 166.0112 | 1.93E-07 | 7.40E-06 | 2 |
| 1397_at   | 1397   | ENSG000001CRIP2    | cysteine-rich protein 2  | 28 | -2.28027 | -1.81651 | -2.37505 | -1.76167 | -1.66995 | 6.530588 | 127.7493 | 5.06E-07 | 1.33E-05 | 2 |
| 55277_at  | 55277  | ENSG000001FGGY     | FGGY carboxyl kinase     | 11 | -2.41153 | -1.92406 | -1.3838  | -2.05617 | -1.96457 | 5.664782 | 98.36611 | 1.31E-06 | 2.43E-05 | 2 |
| 6604_at   | 6604   | ENSG000001SMARCD3  | SWI/SNF related, matr    | 9  | -2.62002 | -1.64914 | -1.94885 | -1.92234 | -1.87272 | 6.041631 | 425.0461 | 6.02E-09 | 1.23E-06 | 2 |
| 274_at    | 274    | ENSG000001BIN1     | bridging integrator 1 I  | 40 | -2.15288 | -2.17226 | -1.62956 | -1.77361 | -1.88865 | 8.582958 | 263.692  | 3.52E-08 | 2.86E-06 | 2 |
| 4054_at   | 4054   | ENSG000001LTBP3    | latent trans Secreted I  | 39 | -2.00104 | -1.89597 | -1.72384 | -1.54515 | -1.86839 | 5.404005 | 194.8035 | 1.07E-07 | 5.35E-06 | 2 |
| 6157_at   | 6157   | ENSG000001RPL27A   | ribosomal protein L27: I | 11 | -2.23218 | -1.9081  | -1.61208 | -1.57337 | -1.71988 | 6.380382 | 61.99209 | 7.01E-06 | 7.67E-05 | 2 |
| 3202_at   | 3202   | ENSG000001HOXA5    | homeobox A5 I            | 10 | -1.89293 | -1.69931 | -2.13714 | -2.13421 | -1.65638 | 4.496136 | 186.1762 | 1.27E-07 | 5.87E-06 | 2 |
| 375061_at | 375061 | ENSG000001FAM89A   | family with sequence s   | 9  | -1.93107 | -2.1046  | -2.23144 | -1.74326 | -1.67082 | 6.293458 | 129.252  | 4.84E-07 | 1.30E-05 | 2 |
| 10398_at  | 10398  | ENSG000001MYL9     | myosin, light chain 9, r | 18 | -1.93774 | -1.92761 | -2.2125  | -1.65057 | -1.6745  | 8.52293  | 357.2673 | 1.15E-08 | 1.68E-06 | 2 |
| 3229_at   | 3229   | ENSG000001HOXC13   | homeobox C13 I           | 10 | -1.96593 | -1.93754 | -2.10515 | -1.80317 | -1.74048 | 4.955446 | 205.0933 | 8.88E-08 | 4.89E-06 | 2 |
| 55194_at  | 55194  | ENSG000001FAM176B  | family with Secreted I   | 11 | -1.90576 | -1.63008 | -2.11264 | -1.52943 | -1.9568  | 4.174335 | 352.7674 | 1.20E-08 | 1.71E-06 | 2 |
| 84993_at  | 84993  | ENSG000001UBL7     | ubiquitin-like 7 (bone   | 11 | -2.07053 | -1.869   | -2.06332 | -1.74523 | -1.97887 | 7.648648 | 376.5841 | 9.43E-09 | 1.56E-06 | 2 |
| 3418_at   | 3418   | ENSG000001IDH2     | isocitrate dehydrogen    | 25 | -1.95886 | -1.88079 | -2.00651 | -1.52691 | -1.5966  | 6.77078  | 141.7126 | 3.46E-07 | 1.03E-05 | 2 |
| 85027_at  | 85027  | ENSG000001C5orf62  | chromosome 5 open r      | 21 | -2.06752 | -1.74068 | -1.99452 | -1.4203  | -1.52447 | 5.653119 | 216.6142 | 7.26E-08 | 4.35E-06 | 2 |
| 9657_at   | 9657   | ENSG000001IQCB1    | IQ motif containing B1   | 8  | -2.17967 | -1.88968 | -1.98746 | -1.34333 | -1.56251 | 5.613144 | 137.4647 | 3.87E-07 | 1.11E-05 | 2 |
| 3226_at   | 3226   | ENSG000001HOXC10   | homeobox C10 I           | 10 | -2.73755 | -1.90884 | -2.47371 | -2.21602 | -2.12271 | 5.375973 | 152.5328 | 3.01E-09 | 1.03E-06 | 2 |
| 2952_at   | 2952   | ENSG000001GSTT1    | glutathione S-transfer   | 9  | -2.47697 | -2.25218 | -2.6081  | -2.27944 | -2.04539 | 5.607711 | 51.62676 | 2.70E-07 | 8.88E-06 | 2 |
| 140686_at | 140686 | ENSG000001WFDC3    | WAP four-( Secreted I    | 30 | -2.8064  | -2.18114 | -2.28066 | -1.77367 | -1.74009 | 7.661833 | 412.6931 | 6.72E-09 | 1.25E-06 | 2 |
| 54763_at  | 54763  | ENSG000001ROPN1    | rhopilin associated ta   | 11 | -2.4484  | -2.03435 | -2.45555 | -1.79486 | -2.05929 | 6.678377 | 53.31249 | 1.21E-05 | 0.000113 | 2 |
| 254887_at | 254887 | ENSG000001ZDHHC23  | zinc finger, DHHC-type   | 11 | -2.37066 | -1.85095 | -2.42395 | -2.12269 | -1.70584 | 6.031211 | 262.9891 | 3.55E-08 | 2.88E-06 | 2 |
| 9249_at   | 9249   | ENSG000001DHR53    | dehydrogenase/reduct     | 20 | -2.43221 | -2.1651  | -2.40729 | -1.78099 | -1.68989 | 4.83289  | 173.5903 | 1.64E-07 | 6.81E-06 | 2 |
| 339803_at | 339803 | NA LOC339803       | hypothetical LOC33980    | 20 | -2.12292 | -2.124   | -2.28198 | -1.91524 | -1.55647 | 6.783698 | 281.9895 | 2.75E-08 | 2.43E-06 | 2 |
| 26515_at  | 26515  | ENSG000001FXC1     | fracture callus 1 homo   | 43 | -2.36714 | -2.0671  | -2.19831 | -1.90916 | -1.55554 | 7.50462  | 327.51   | 1.58E-08 | 1.80E-06 | 2 |
| 55351_at  | 55351  | ENSG000001STK32B   | serine/thr kinase I      | 33 | -2.51495 | -2.20279 | -1.92287 | -1.87872 | -2.20936 | 4.664887 | 318.3553 | 1.75E-08 | 1.92E-06 | 2 |
| 642946_at | 642946 | NA FLVCR1-AS       | FLVCR1 antisense RNA     | 20 | -2.19518 | -2.04034 | -1.95299 | -1.84651 | -1.94438 | 5.55308  | 129.9279 | 4.75E-07 | 1.28E-05 | 2 |
| 4605_at   | 4605   | ENSG000001MYBL2    | v-myb myeloblastosis     | 11 | -2.3871  | -2.03857 | -1.91495 | -1.95571 | -2.06719 | 7.471442 | 86.10053 | 2.13E-06 | 3.39E-05 | 2 |
| 1123_at   | 1123   | ENSG000001CHN1     | chimerin (chimaerin) 1   | 27 | -2.36936 | -2.31074 | -1.93112 | -1.90123 | -1.8202  | 7.514606 | 260.8799 | 3.66E-08 | 2.93E-06 | 2 |
| 55971_at  | 55971  | ENSG000001BAIAP2L1 | BAI1-associated protei   | 19 | -2.32255 | -2.55711 | -2.14714 | -1.93199 | -1.86491 | 6.244439 | 207.5159 | 8.51E-08 | 4.79E-06 | 2 |
| 254552_at | 254552 | ENSG000001NUDT8    | nudix (nucleoside diph   | 9  | -2.42588 | -2.27977 | -2.11541 | -1.92302 | -1.99002 | 7.267252 | 278.3616 | 2.88E-08 | 2.51E-06 | 2 |
| 9214_at   | 9214   | ENSG000001FAIM3    | Fas apoptotic inhibitor  | 50 | -2.29152 | -2.42468 | -2.08213 | -2.05966 | -2.05269 | 6.007836 | 89.70903 | 1.84E-06 | 3.05E-05 | 2 |
| 254268_at | 254268 | ENSG000001AKNAD1   | AKNA domain containi     | 10 | -1.69123 | -2.29718 | -2.36002 | -2.26399 | -1.83641 | 5.718077 | 442.2406 | 5.20E-09 | 1.23E-06 | 2 |
| 7036_at   | 7036   | ENSG000001TFR2     | transferrin peptidase    | 11 | -1.8131  | -2.16486 | -2.60503 | -2.30265 | -2.03569 | 5.33107  | 158.5766 | 2.29E-07 | 8.07E-06 | 2 |
| 1307_at   | 1307   | ENSG000001COL16A1  | collagen, ty Secreted I  | 10 | -2.07362 | -2.58851 | -2.93646 | -1.87081 | -1.81144 | 5.758417 | 321.8132 | 1.69E-08 | 1.89E-06 | 2 |
| 100134259 | 1E+08  | NA LOC100134       | hypothetical LOC1001:    | 9  | -2.0901  | -2.35854 | -2.61293 | -2.25511 | -1.27697 | 5.105084 | 310.0565 | 1.93E-08 | 1.99E-06 | 2 |
| 6926_at   | 6926   | ENSG000001TBX3     | T-box 3 Secreted I       | 52 | -2.11833 | -2.12908 | -2.76418 | -2.32239 | -1.69723 | 5.198834 | 180.642  | 1.42E-07 | 6.21E-06 | 2 |
| 374928_at | 374928 | ENSG000001ZNF773   | zinc finger protein 773  | 22 | -2.31767 | -2.41244 | -2.67668 | -2.07146 | -1.64281 | 5.376017 | 152.9882 | 2.61E-07 | 8.70E-06 | 2 |
| 5055_at   | 5055   | ENSG000001SERPINB2 | serpin peptidase I       | 11 | -1.79318 | -2.86064 | -2.48266 | -2.06364 | -1.55625 | 8.005537 | 31.64554 | 7.66E-05 | 0.000458 | 2 |
| 23705_at  | 23705  | ENSG000001CADM1    | cell adhesion molecule   | 54 | -2.25261 | -2.73559 | -2.18912 | -2.09798 | -1.63876 | 5.264045 | 125.7628 | 5.35E-07 | 1.39E-05 | 2 |
| 51027_at  | 51027  | ENSG000001BOLA1    | boIA homo Secreted I     | 11 | -2.13847 | -2.85201 | -2.21368 | -2.21088 | -1.6575  | 7.183004 | 310.4074 | 1.93E-08 | 1.99E-06 | 2 |
| 4921_at   | 4921   | ENSG000001DDR2     | discoidin d kinase I     | 9  | -2.21492 | -2.6695  | -2.44201 | -2.22123 | -1.81457 | 4.801508 | 259.8638 | 3.71E-08 | 2.93E-06 | 2 |
| 56776_at  | 56776  | ENSG000001FMN2     | formin 2 I               | 32 | -2.10725 | -2.81238 | -2.41346 | -2.3621  | -1.73695 | 5.183398 | 300.9012 | 2.16E-08 | 2.13E-06 | 2 |
| 6883_at   | 6883   | ENSG000001TAF12    | TAF12 RNA polymeras      | 10 | -2.02922 | -2.47176 | -2.31208 | -1.63113 | -1.83031 | 7.660135 | 335.8158 | 1.44E-08 | 1.76E-06 | 2 |
| 54981_at  | 54981  | ENSG000001C9orf95  | chromosom kinase I       | 9  | -2.06272 | -2.47212 | -2.48357 | -1.8211  | -1.84709 | 6.742472 | 309.7231 | 1.94E-08 | 1.99E-06 | 2 |
| 11234_at  | 11234  | ENSG000001HP55     | Hermansky-Pudlak syn     | 31 | -2.30292 | -2.37501 | -2.29635 | -1.62495 | -1.47885 | 8.423658 | 154.4622 | 2.52E-07 | 8.49E-06 | 2 |
| 58538_at  | 58538  | ENSG000001MPP4     | membrane protein, pa     | 11 | -2.19978 | -2.47963 | -2.31236 | -1.80601 | -1.63749 | 6.061185 | 206.2356 | 8.70E-08 | 4.84E-06 | 2 |
| 59307_at  | 59307  | ENSG000001SIGIRR   | single immunoglobulin    | 25 | -2.23806 | -2.50066 | -2.06998 | -1.61726 | -1.78769 | 6.094023 | 195.8369 | 1.05E-07 | 5.33E-06 | 2 |
| 115908_at | 115908 | ENSG000001CTHRC1   | collagen triple helix re | 33 | -2.29972 | -2.38472 | -2.09971 | -1.76839 | -1.5465  | 6.164771 | 352.8177 | 1.20E-08 | 1.71E-06 | 2 |
| 8869_at   | 8869   | ENSG000001ST3GAL5  | ST3 beta-galactoside a   | 11 | -2.18427 | -2.47421 | -2.01726 | -1.89883 | -1.59532 | 8.575893 | 142.3319 | 3.40E-07 | 1.02E-05 | 2 |
| 64167_at  | 64167  | ENSG000001ERAP2    | endoplasm peptidase I    | 30 | -2.50887 | -2.62805 | -2.06277 | -2.09855 | -1.73234 | 7.005306 | 347.064  | 1.27E-08 | 1.73E-06 | 2 |
| 5002_at   | 5002   | ENSG000001SLC22A18 | solute carri transporte  | 10 | -2.51186 | -2.79354 | -2.21626 | -2.00657 | -1.79223 | 8.019185 | 337.4145 | 1.41E-08 | 1.76E-06 | 2 |
| 3676_at   | 3676   | ENSG000001ITGA4    | integrin, alpha 4 (antig | 38 | -2.49667 | -2.60999 | -2.05835 | -1.93452 | -1.50032 | 4.619915 | 540.5636 | 2.47E-09 | 1.03E-06 | 2 |
| 4638_at   | 4638   | ENSG000001MYLK     | myosin light kinase I    | 33 | -2.52264 | -2.57062 | -2.38629 | -1.81027 | -1.47501 | 8.746849 | 588.3995 | 1.81E-09 | 9.95E-07 | 2 |
| 4828_at   | 4828   | ENSG000001NMB      | neuromedi Secreted I     | 10 | -2.3392  | -2.73177 | -2.37345 | -1.88815 | -1.61467 | 7.206308 | 342.3298 | 1.34E-08 | 1.75E-06 | 2 |
| 55619_at  | 55619  | ENSG000001DOCK10   | diacytor c Secreted I    | 33 | -2.33449 | -2.61738 | -2.29558 | -2.01627 |          |          |          |          |          |   |

|           |        |                    |                                                      |                                           |          |          |          |          |          |          |          |          |          |          |   |
|-----------|--------|--------------------|------------------------------------------------------|-------------------------------------------|----------|----------|----------|----------|----------|----------|----------|----------|----------|----------|---|
| 55313_at  | 55313  | ENSG000001CPPED1   | calcineurin-like phosphatase                         | 53                                        | -2.08268 | -2.07413 | -1.93952 | -1.55222 | -1.40606 | 7.826542 | 298.5773 | 2.22E-08 | 2.14E-06 | 2        |   |
| 29091_at  | 29091  | ENSG000001STXBP6   | synaptobrevin binding protein                        | 32                                        | -2.56721 | -2.27807 | -1.9859  | -1.55787 | -1.28823 | 4.128191 | 60.69887 | 7.56E-06 | 8.04E-05 | 2        |   |
| 26022_at  | 26022  | ENSG000001TMEM98   | transmembrane protein                                | 10                                        | -2.28739 | -2.2817  | -1.87017 | -1.47575 | -1.49306 | 4.696098 | 55.74144 | 1.03E-05 | 0.000101 | 2        |   |
| 3113_at   | 3113   | NA                 | HLA-DPA1                                             | major histocompatibility complex class II | 42       | -2.44594 | -2.27325 | -1.80479 | -1.38306 | -1.23199 | 10.66033 | 223.1061 | 6.51E-08 | 4.11E-06 | 2 |
| 3108_at   | 3108   | NA                 | HLA-DMA                                              | major histocompatibility complex class II | 20       | -2.50284 | -2.26096 | -1.71497 | -1.43658 | -1.40847 | 8.504502 | 193.7531 | 1.10E-07 | 5.39E-06 | 2 |
| 28990_at  | 28990  | ENSG000001ASTE1    | asteroidin-like secreted protein                     | 10                                        | -1.55711 | -2.06612 | -1.97858 | -1.54723 | -1.23042 | 6.003599 | 199.0304 | 9.92E-08 | 5.18E-06 | 2        |   |
| 6648_at   | 6648   | ENSG000001SOD2     | superoxide dismutase 2                               | 21                                        | -1.56852 | -2.25066 | -1.89658 | -1.7067  | -1.17653 | 7.956829 | 12.66645 | 0.001678 | 0.005546 | 2        |   |
| 7456_at   | 7456   | ENSG000001WIPF1    | WAS/WASL interacting protein                         | 64                                        | -1.57571 | -2.16294 | -1.51827 | -1.68542 | -1.39285 | 5.490596 | 181.6415 | 1.39E-07 | 6.18E-06 | 2        |   |
| 55686_at  | 55686  | ENSG000001MREG     | melanoregulin secreted protein                       | 11                                        | -1.60582 | -2.38016 | -1.64572 | -1.74534 | -1.27519 | 8.053133 | 299.2642 | 2.20E-08 | 2.13E-06 | 2        |   |
| 10683_at  | 10683  | ENSG000001DLL3     | delta-like 3 secreted protein                        | 31                                        | -1.50818 | -2.15809 | -2.19011 | -1.67504 | -1.45614 | 4.734411 | 169.9142 | 1.78E-07 | 7.03E-06 | 2        |   |
| 200728_at | 200728 | ENSG000001TMEM17   | transmembrane protein                                | 11                                        | -1.68905 | -2.18169 | -2.00216 | -1.53468 | -1.66592 | 7.310376 | 166.6739 | 1.91E-07 | 7.33E-06 | 2        |   |
| 6695_at   | 6695   | ENSG000001SPOCK1   | sparc/osterix secreted protein                       | 11                                        | -1.8503  | -2.07699 | -2.04553 | -1.57735 | -1.48292 | 9.638488 | 100.4906 | 1.22E-06 | 2.33E-05 | 2        |   |
| 11057_at  | 11057  | ENSG000001ABHD2    | abhydrolase domain containing                        | 42                                        | -1.80732 | -2.05433 | -1.97045 | -1.70788 | -1.50876 | 6.334354 | 213.1293 | 7.71E-08 | 4.53E-06 | 2        |   |
| 1306_at   | 1306   | ENSG000001COL15A1  | collagen, type I secreted                            | 11                                        | -1.97665 | -2.0797  | -1.8396  | -2.0358  | -1.73579 | 5.166662 | 32.73943 | 6.80E-05 | 0.000417 | 2        |   |
| 23043_at  | 23043  | ENSG000001TNIK     | TRAF2 and kinase                                     | 30                                        | -1.67946 | -2.3263  | -1.69544 | -2.01977 | -1.44906 | 4.924787 | 172.9219 | 1.66E-07 | 6.84E-06 | 2        |   |
| 22873_at  | 22873  | ENSG000001DZIP1    | DAZ interacting protein                              | 31                                        | -1.75738 | -2.28043 | -2.07388 | -2.02667 | -1.46385 | 5.482023 | 151.7388 | 2.69E-07 | 8.87E-06 | 2        |   |
| 26018_at  | 26018  | ENSG000001LRIG1    | leucine-rich repeats and immunoglobulin-like domains | 21                                        | -1.89919 | -2.02599 | -1.80577 | -1.80573 | -1.42322 | 5.932113 | 116.6873 | 7.04E-07 | 1.65E-05 | 2        |   |
| 55239_at  | 55239  | ENSG000001OGFOD1   | 2-oxoglutarate and iron-dependent dioxygenase        | 30                                        | -2.04011 | -1.88855 | -1.69886 | -1.61909 | -1.56263 | 7.920429 | 214.1795 | 5.75E-08 | 4.50E-06 | 2        |   |
| 51226_at  | 51226  | ENSG000001COPZ2    | coatamer protein component                           | 8                                         | -1.88078 | -1.89867 | -1.79166 | -1.61113 | -1.66753 | 7.222214 | 254.2376 | 4.02E-08 | 3.10E-06 | 2        |   |
| 56993_at  | 56993  | ENSG000001TOMM22   | translocase of outer mitochondrial membrane          | 10                                        | -1.94269 | -2.06667 | -1.81575 | -1.59629 | -1.65944 | 9.818788 | 334.0109 | 1.47E-08 | 1.76E-06 | 2        |   |
| 51530_at  | 51530  | ENSG000001ZC3HC1   | zinc finger, C3HC-type 1                             | 10                                        | -1.84969 | -1.7858  | -1.77424 | -1.65869 | -1.48308 | 8.75895  | 159.511  | 2.24E-07 | 8.04E-06 | 2        |   |
| 286053_at | 286053 | ENSG000001NSMCE2   | non-SMC element 2, nuclear matrix core               | 9                                         | -1.75545 | -1.96829 | -1.82819 | -1.64024 | -1.47302 | 8.358086 | 191.5027 | 1.14E-07 | 5.51E-06 | 2        |   |
| 115701_at | 115701 | ENSG000001ALPK2    | alpha-kinase                                         | 11                                        | -1.69662 | -1.76839 | -1.84112 | -1.59183 | -1.49531 | 4.312206 | 42.53494 | 2.70E-05 | 0.000207 | 2        |   |
| 51300_at  | 51300  | ENSG000001TIMMDC1  | translocase secreted                                 | 11                                        | -1.61837 | -1.87073 | -1.81814 | -1.52875 | -1.43148 | 10.85478 | 229.3885 | 5.88E-08 | 3.90E-06 | 2        |   |
| 81618_at  | 81618  | ENSG000001ITM2C    | integral membrane protein                            | 70                                        | -1.70297 | -1.86403 | -1.75159 | -1.5914  | -1.47155 | 6.527823 | 218.6268 | 7.02E-08 | 4.30E-06 | 2        |   |
| 84856_at  | 84856  | NA                 | LOC84856                                             | hypothetical LOC84856                     | 3        | 0.423555 | -1.818   | -1.43861 | -1.10435 | -0.81999 | 4.595906 | 31.94971 | 7.41E-05 | 0.000446 | 1 |
| 79630_at  | 79630  | ENSG000001C1orf54  | chromosome 1 open reading frame                      | 8                                         | -0.00363 | -0.6081  | -2.09094 | -1.21659 | -0.85081 | 4.741895 | 74.41808 | 3.62E-06 | 4.85E-05 | 1        |   |
| 55199_at  | 55199  | ENSG000001FAM86C1  | family with sequence 8                               | 3                                         | 0.740111 | -1.05937 | -2.04647 | -1.37647 | -1.31253 | 4.21601  | 18.45059 | 0.000488 | 0.001998 | 1        |   |
| 119467_at | 119467 | ENSG000001CLRN3    | clarin 3                                             | 10                                        | -0.6752  | -0.91665 | -2.31541 | -1.16254 | -1.11355 | 4.027912 | 13.72258 | 0.001296 | 0.004469 | 1        |   |
| 11272_at  | 11272  | ENSG000001PRR4     | proline rich secreted protein                        | 3                                         | -0.69722 | -1.01611 | -2.61272 | -1.01699 | -1.45821 | 5.539061 | 16.6466  | 0.000688 | 0.002645 | 1        |   |
| 1281_at   | 1281   | ENSG000001COL3A1   | collagen, type I secreted                            | 51                                        | -0.91999 | -1.42619 | -2.35617 | -0.83989 | -0.87793 | 4.046024 | 33.87964 | 6.03E-05 | 0.00038  | 1        |   |
| 2212_at   | 2212   | ENSG000001FCGR2A   | Fc fragment of IgG, low affinity                     | 10                                        | -0.94035 | -1.08273 | -1.67011 | -0.7308  | -0.73534 | 4.322299 | 16.94653 | 0.000648 | 0.002516 | 1        |   |
| 9242_at   | 9242   | ENSG000001MSC      | musculin                                             | 11                                        | -0.91427 | -0.82683 | -2.05251 | -0.70085 | -1.23744 | 3.819878 | 42.43634 | 2.72E-05 | 0.000208 | 1        |   |
| 10800_at  | 10800  | ENSG000001CYSLTR1  | cysteinyl leucine G-protein coupled receptor         | 11                                        | -0.35175 | -1.66173 | -1.29356 | -2.48088 | -2.16415 | 4.643161 | 26.65271 | 0.000139 | 0.000729 | 1        |   |
| 623_at    | 623    | ENSG000001BDKRB1   | bradykinin G-protein coupled receptor                | 11                                        | -0.87905 | -2.32437 | -2.03687 | -2.52498 | -2.32571 | 4.991493 | 104.0423 | 1.07E-06 | 2.17E-05 | 1        |   |
| 8000_at   | 8000   | ENSG000001PSCA     | prostate stem cell antigen                           | 11                                        | -0.94848 | -1.28039 | -1.62122 | -1.93728 | -2.29156 | 4.991019 | 70.5692  | 4.39E-06 | 5.50E-05 | 1        |   |
| 28638_at  | 28638  | NA                 | TRBC2                                                | T cell receptor beta chain                | 33       | -1.31976 | -1.16486 | -1.65992 | -2.04951 | -2.64218 | 6.214347 | 25.73368 | 0.000157 | 0.000799 | 1 |
| 8710_at   | 8710   | ENSG000001SERPINB7 | serpin peptidase inhibitor                           | 22                                        | -1.25715 | -1.76614 | -1.39235 | -2.01433 | -2.06027 | 5.208338 | 117.8255 | 6.80E-07 | 1.61E-05 | 1        |   |
| 51702_at  | 51702  | ENSG000001PAD13    | peptidyl arginine deiminase                          | 11                                        | -1.36492 | -1.5749  | -1.74482 | -2.25003 | -2.14091 | 5.402902 | 159.7866 | 2.23E-07 | 8.02E-06 | 1        |   |
| 283234_at | 283234 | ENSG000001CCDC88B  | coiled-coil domain containing                        | 11                                        | -1.17349 | -1.86638 | -1.68381 | -2.32234 | -2.38906 | 5.533676 | 85.04759 | 2.23E-06 | 3.51E-05 | 1        |   |
| 83938_at  | 83938  | ENSG000001C10orf11 | chromosome 10 open reading frame                     | 8                                         | -1.28325 | -1.53216 | -2.08065 | -2.04637 | -1.70805 | 5.012867 | 158.8824 | 2.27E-07 | 8.07E-06 | 1        |   |
| 5396_at   | 5396   | ENSG000001PRRX1    | paired related homeobox                              | 21                                        | -1.14088 | -1.86639 | -1.89044 | -1.83194 | -1.58707 | 5.061257 | 89.41129 | 1.86E-06 | 3.07E-05 | 1        |   |
| 26353_at  | 26353  | ENSG000001HSPB8    | heat shock protein                                   | 22                                        | -1.14632 | -1.95254 | -1.94833 | -1.97768 | -1.54003 | 5.745053 | 288.9758 | 2.51E-08 | 2.34E-06 | 1        |   |
| 140885_at | 140885 | ENSG000001SIRPA    | signal-regulatory protein                            | 20                                        | -1.40164 | -1.79234 | -1.32955 | -1.67199 | -2.02259 | 4.881858 | 116.4998 | 7.08E-07 | 1.66E-05 | 1        |   |
| 5360_at   | 5360   | ENSG000001PLTP     | phospholipid transfer protein                        | 5                                         | -1.54516 | -1.99528 | -1.46316 | -1.49267 | -1.96417 | 5.124959 | 54.33082 | 1.13E-05 | 0.000108 | 1        |   |
| 6535_at   | 6535   | ENSG000001SLC6A8   | solute carrier transporter                           | 16                                        | -1.13368 | -2.25513 | -1.66081 | -1.84997 | -1.78705 | 7.996693 | 69.1566  | 4.72E-06 | 5.80E-05 | 1        |   |
| 8612_at   | 8612   | ENSG000001PPAP2C   | phosphatidyl phosphatidylcholine transferase         | 21                                        | -1.51168 | -2.14811 | -1.81824 | -1.58657 | -1.8118  | 8.170636 | 191.8287 | 1.14E-07 | 5.51E-06 | 1        |   |
| 57333_at  | 57333  | ENSG000001RCN3     | reticulocalcin secreted                              | 11                                        | -1.37925 | -1.87186 | -1.58572 | -1.69604 | -1.77423 | 5.467472 | 72.89544 | 3.90E-06 | 5.10E-05 | 1        |   |
| 6622_at   | 6622   | ENSG000001SNCA     | synuclein, alpha (non A4)                            | 70                                        | -1.30933 | -1.84194 | -1.82945 | -1.8999  | -1.84415 | 5.305004 | 120.8541 | 6.19E-07 | 1.52E-05 | 1        |   |
| 11159_at  | 11159  | ENSG000001RAB12A   | RAB, member of GTPase                                | 3                                         | -1.23693 | -1.39798 | -2.04261 | -1.16171 | -2.22445 | 6.124472 | 103.2502 | 1.10E-06 | 2.20E-05 | 1        |   |
| 3201_at   | 3201   | ENSG000001HOXA4    | homeobox A4                                          | 11                                        | -1.05869 | -1.05143 | -1.90061 | -1.18574 | -1.82498 | 4.575148 | 131.0054 | 4.61E-07 | 1.25E-05 | 1        |   |
| 84561_at  | 84561  | ENSG000001SLC12A8  | solute carrier transporter                           | 22                                        | -1.04211 | -1.27275 | -1.76501 | -1.45445 | -1.8387  | 5.224151 | 48.2618  | 1.72E-05 | 0.000148 | 1        |   |
| 100_at    | 100    | ENSG000001ADA      | adenosine deaminase                                  | 21                                        | -1.1467  | -1.39126 | -1.77351 | -1.45763 | -1.6334  | 6.329552 | 39.48732 | 3.51E-05 | 0.000252 | 1        |   |
| 92815_at  | 92815  | ENSG000001HIST3H2A | histone cluster 3, H2a                               | 11                                        | -1.95893 | -1.33393 | -1.88682 | -1.67273 | -2.19466 | 4.581768 | 43.75822 | 2.44E-05 | 0.000191 | 1        |   |
| 55715_at  | 55715  | ENSG000001DOK4     | docking protein 4                                    | 20                                        | -1.71643 | -1.37052 | -1.36962 | -1.62773 | -1.91874 | 5.903357 | 82.38486 | 2.50E-06 | 3.75E-05 | 1        |   |
| 8572_at   | 8572   | ENSG000001PDLIM4   | PDZ and LIM domain 4                                 | 22                                        | -1.82196 | -1.61712 | -1.51415 | -1.44215 | -1.8719  | 7.451894 | 252.5104 | 4.13E-08 | 3.14E-06 | 1        |   |
| 3778_at   | 3778   | ENSG000001KCNMA1   | potassium ion channel                                | 53                                        | -1.59446 | -1.34039 | -1.76333 | -1.55987 | -2.0126  | 4.761733 | 151.4653 | 2.71E-07 | 8.90E-06 | 1        |   |
| 773_at    | 773    | ENSG000001CACNA1A  | calcium channel                                      | 33                                        | -1.46593 | -1.32732 | -1.82029 | -1.51562 | -1.72882 | 4.609662 | 89.37288 | 1.86E-06 | 3.07E-05 | 1        |   |
| 4151_at   | 4151   | ENSG000001MB       | myoglobin transporter                                | 31                                        | -1.44864 | -1.35315 | -1.78968 | -1.64664 | -1.78594 | 5.986326 | 19.57901 | 0.0004   | 0.001697 | 1        |   |
| 3383_at   | 3383   | ENSG000001ICAM1    | intercellular adhesion molecule                      | 30                                        | -1.61072 | -1.33659 | -2.02322 | -1.26203 | -1.56762 | 7.70923  | 111.3574 | 8.35E-07 | 1.86E-05 | 1        |   |
| 64780_at  | 64780  | ENSG000001MICAL1   | microtubule associated                               | 9                                         | -1.65521 | -1.54752 | -2.05326 | -1.17302 | -1.69864 | 6.394715 | 72.15979 | 4.05E-06 | 5.22E-05 | 1        |   |
| 661_at    | 661    | ENSG000001POLR3D   | polymerase (RNA) III (DNA directed)                  | 48                                        | -1.76726 | -1.60047 | -1.86728 | -1.41369 | -1.6823  | 6.118587 | 190.2983 | 1.17E-07 | 5.57E-06 | 1        |   |
| 6484_at   | 6484   | ENSG000001ST3GAL4  | ST3 beta-galactosyl transferase                      | 33                                        | -1.61588 | -1.54382 | -1.80526 | -1.35165 | -1.40576 | 7.181661 | 212.2058 | 7.84E-08 | 4.56E-06 | 1        |   |
| 221184_at | 221184 | ENSG000001CPNE2    | copine II                                            | 11                                        | -1.6707  | -1.60408 | -1.84551 | -1.26006 | -1.45666 | 6.930006 | 136.8551 | 3.93E-07 | 1.12E-05 | 1        |   |
| 339229_at | 339229 | ENSG000001C17orf90 | chromosome 17 open reading frame                     | 11                                        | -1.74382 | -1.79588 | -1.80071 | -1.69874 | -1.72386 | 6.192036 | 67.73149 | 5.09E-06 | 6.13E-05 | 1        |   |
| 80115_at  | 80115  | ENSG000001BAIAP2L2 | BAI1-associated protein                              | 11                                        | -1.67104 | -1.78119 | -2.01818 | -1.68687 | -1.73138 | 5.118356 | 120.1211 | 6.33E-07 | 1.54E-05 | 1        |   |
| 400916_at | 400916 | ENSG000001CHCHD10  | coiled-coil-helix-coiled-coil domain                 | 6                                         | -1.42634 | -1.76271 | -1.83329 | -1.67731 | -1.68253 | 8.823894 | 274.1204 | 3.05E-08 | 2.58E-06 | 1        |   |
| 118611_at | 118611 | ENSG000001C10orf90 | chromosome 10 open reading frame                     | 19                                        | -1.36936 | -1.82853 | -1.87844 | -1.69131 | -1.69331 | 4.453246 | 99.66272 | 1.25E-06 | 2.37E-05 | 1        |   |
| 64801_at  | 64801  | ENSG000001ARV1     | ARV1 homolog (S. cerevisiae)                         | 10                                        | -1.5507  | -1.7118  | -1.83594 | -1.7151  | -1.5364  | 8.020809 | 197.6779 | 1.02E-07 | 5.22E-06 | 1        |   |
| 27350_at  | 27350  | ENSG000001APOBEC3C | apolipoprotein B mRNA editing                        | 10                                        | -1.60404 | -1.8414  |          |          |          |          |          |          |          |          |   |

|           |        |                     |                            |    |          |          |            |          |          |          |          |          |          |   |
|-----------|--------|---------------------|----------------------------|----|----------|----------|------------|----------|----------|----------|----------|----------|----------|---|
| 91975_at  | 91975  | ENSG000001ZNF300    | zinc finger protein 300 I  | 22 | -1.36994 | -1.5911  | -1.5569    | -1.42749 | -0.92251 | 4.862436 | 152.2473 | 2.66E-07 | 8.79E-06 | 1 |
| 3234_at   | 3234   | ENSG000001HOXD8     | homeobox D8                | 20 | -1.36547 | -1.73834 | -1.53546   | -1.6197  | -1.10698 | 4.150139 | 144.6104 | 3.21E-07 | 9.91E-06 | 1 |
| 7328_at   | 7328   | ENSG000001UBE2H     | ubiquitin-conjugating I    | 36 | -1.43095 | -1.85572 | -1.62761   | -1.50496 | -1.16176 | 8.268197 | 273.8919 | 3.06E-08 | 2.58E-06 | 1 |
| 84928_at  | 84928  | ENSG000001TMEM209   | transmembrane protei I     | 21 | -1.44998 | -1.71941 | -1.89603   | -1.58006 | -0.94205 | 6.538158 | 139.5107 | 3.66E-07 | 1.07E-05 | 1 |
| 4074_at   | 4074   | ENSG000001MGPR      | mannose-6 transportei I    | 7  | -1.34799 | -1.74167 | -1.79642   | -1.78169 | -1.00086 | 8.451653 | 59.59717 | 8.08E-06 | 8.44E-05 | 1 |
| 9897_at   | 9897   | ENSG000001KIAA0196  | KIAA0196                   | 9  | -1.4086  | -1.83118 | -1.71042   | -1.76969 | -1.0753  | 8.050716 | 126.9171 | 5.18E-07 | 1.35E-05 | 1 |
| 1130_at   | 1130   | ENSG000001LYST      | lysosomal trafficking ri I | 33 | -1.00454 | -1.91552 | -1.20285   | -1.73178 | -1.01007 | 4.61542  | 87.91978 | 1.98E-06 | 3.21E-05 | 1 |
| 3398_at   | 3398   | ENSG000001ID2       | inhibitor of DNA bindi I   | 3  | -0.90084 | -1.96963 | -1.09117   | -1.80695 | -1.52457 | 3.837668 | 48.3432  | 1.71E-05 | 0.000148 | 1 |
| 2247_at   | 2247   | ENSG000001FGF2      | fibroblast growth factc I  | 31 | -1.64905 | -1.98306 | -1.00968   | -1.66479 | -1.48673 | 4.222476 | 90.30354 | 1.79E-06 | 3.01E-05 | 1 |
| 79837_at  | 79837  | ENSG000001PIP4K2C   | phosphatid kinase          | 11 | -1.82188 | -1.73436 | -1.21659   | -1.15648 | -1.49002 | 7.635709 | 192.5243 | 1.12E-07 | 5.48E-06 | 1 |
| 11092_at  | 11092  | ENSG000001C9orf9    | chromosome 9 open ri I     | 12 | -1.84633 | -1.86095 | -0.98141   | -1.19799 | -1.59301 | 5.182716 | 43.43497 | 2.51E-05 | 0.000195 | 1 |
| 57580_at  | 57580  | ENSG000001PREX1     | phosphatidylinositol-3 I   | 22 | -1.3778  | -1.56985 | -0.75904   | -1.63604 | -1.6459  | 4.582032 | 33.07618 | 6.56E-05 | 0.000406 | 1 |
| 27147_at  | 27147  | ENSG000001DENND2A   | DENN/MADD domain i I       | 11 | -1.62345 | -1.27653 | -1.12208   | -1.77128 | -1.63588 | 5.990856 | 67.61397 | 5.12E-06 | 6.15E-05 | 1 |
| 254359_at | 254359 | ENSG000001ZDHHC24   | zinc finger, DHHC-type I   | 11 | -1.61497 | -1.56462 | -1.22126   | -1.28537 | -1.64123 | 6.119668 | 201.1026 | 9.55E-08 | 5.15E-06 | 1 |
| 375387_at | 375387 | ENSG000001LRRC33    | leucine rich repeat con I  | 11 | -1.38242 | -1.3217  | -1.18502   | -1.4386  | -1.51148 | 7.007768 | 80.91053 | 2.67E-06 | 3.95E-05 | 1 |
| 6609_at   | 6609   | ENSG000001SMPD1     | sphingomy Secreted         | 11 | -1.52701 | -1.44239 | -1.18284   | -1.37911 | -1.47634 | 8.769687 | 230.6121 | 5.77E-08 | 3.86E-06 | 1 |
| 2258_at   | 2258   | ENSG000001FGF13     | fibroblast growth factc I  | 32 | -1.35832 | -1.72956 | -1.59719   | -1.75273 | -1.43695 | 4.39922  | 182.0212 | 1.38E-07 | 6.18E-06 | 1 |
| 55958_at  | 55958  | ENSG000001KLHL9     | kelch-like 9 (Drosophi I   | 44 | -1.55037 | -1.70173 | -1.60865   | -1.79552 | -1.51378 | 4.278957 | 199.4599 | 9.84E-08 | 5.18E-06 | 1 |
| 7291_at   | 7291   | ENSG000001TWIST1    | twist homolog 1 (Dros I    | 11 | -1.58859 | -1.73578 | -1.33513   | -1.5412  | -1.67633 | 4.053782 | 86.68584 | 2.08E-06 | 3.33E-05 | 1 |
| 123283_at | 123283 | ENSG000001TARSL2    | threonyl-tRNA synthet I    | 22 | -1.65633 | -1.71961 | -1.59581   | -1.71659 | -1.66163 | 5.649364 | 185.1957 | 1.29E-07 | 5.92E-06 | 1 |
| 4643_at   | 4643   | ENSG000001MYO1E     | myosin IE                  | 19 | -1.19603 | -1.61124 | -1.4651    | -1.61006 | -1.44949 | 5.456124 | 200.6767 | 9.63E-08 | 5.16E-06 | 1 |
| 51393_at  | 51393  | ENSG000001TRPV2     | transient ri ion channe I  | 20 | -1.32064 | -1.65793 | -1.28881   | -1.41241 | -1.67917 | 5.00504  | 51.16811 | 1.40E-05 | 0.000126 | 1 |
| 875_at    | 875    | ENSG000001CBS       | cystathionine-beta-syr I   | 59 | -1.1983  | -1.7123  | -1.28062   | -1.55708 | -1.62143 | 4.368135 | 225.3757 | 6.28E-08 | 4.03E-06 | 1 |
| 91607_at  | 91607  | ENSG000001SLFN11    | schlafen family membr I    | 33 | -1.44541 | -1.63581 | -1.25446   | -1.79578 | -1.38752 | 4.646935 | 103.5818 | 1.09E-06 | 2.19E-05 | 1 |
| 10544_at  | 10544  | ENSG000001PROC      | protein C receptor, enc I  | 11 | -1.41765 | -1.6908  | -1.32932   | -1.46155 | -1.3746  | 9.207505 | 176.771  | 1.54E-07 | 6.53E-06 | 1 |
| 90557_at  | 90557  | ENSG000001CCDC74A   | coiled-coil domain con I   | 8  | -1.51076 | -1.61012 | -1.33367   | -1.44079 | -1.39135 | 6.231692 | 127.303  | 5.12E-07 | 1.34E-05 | 1 |
| 125228_at | 125228 | ENSG000001C18orf19  | chromosome 18 open I       | 22 | -1.22837 | -1.67802 | -1.16797   | -1.30563 | -1.29532 | 8.48304  | 79.13114 | 2.90E-06 | 4.17E-05 | 1 |
| 545_at    | 545    | ENSG000001ATR       | ataxia telar kinase        | 8  | -1.03847 | -1.70113 | -1.36567   | -1.37316 | -1.22263 | 7.076171 | 189.0912 | 1.20E-07 | 5.63E-06 | 1 |
| 8985_at   | 8985   | ENSG000001PLOD3     | procollager Secreted       | 46 | -1.17479 | -1.45759 | -1.6033    | -1.20919 | -1.3501  | 5.552611 | 157.0594 | 2.37E-07 | 8.18E-06 | 1 |
| 79918_at  | 79918  | ENSG000001SETD6     | SET domain containing I    | 46 | -1.28743 | -1.43151 | -1.584     | -1.42149 | -1.44295 | 5.921729 | 105.7914 | 1.01E-06 | 2.08E-05 | 1 |
| 1465_at   | 1465   | ENSG000001CSR1P     | cysteine and glycine-ri I  | 63 | -1.3154  | -1.34869 | -1.31753   | -1.13926 | -1.36306 | 8.414562 | 186.8394 | 1.25E-07 | 5.83E-06 | 1 |
| 7045_at   | 7045   | ENSG000001TGFB1     | transformin Secreted       | 44 | -1.31954 | -1.28866 | -1.30093   | -1.23095 | -1.40517 | 9.171314 | 23.18714 | 0.000225 | 0.001066 | 1 |
| 7074_at   | 7074   | ENSG000001TIAM1     | T-cell lymphoma invas I    | 22 | -1.06911 | -1.3379  | -1.26328   | -1.36479 | -1.27005 | 6.097174 | 43.05996 | 2.58E-05 | 0.0002   | 1 |
| 4882_at   | 4882   | ENSG000001NPR2      | natriuretic G-protein c I  | 10 | -1.14951 | -1.24346 | -1.30684   | -1.3438  | -1.36969 | 4.964622 | 105.9169 | 1.00E-06 | 2.08E-05 | 1 |
| 80339_at  | 80339  | ENSG000001PNPLA3    | patatin-like phospholi I   | 11 | -1.21724 | -1.44767 | -1.26065   | -1.45053 | -1.43556 | 6.674512 | 23.21502 | 0.000224 | 0.001062 | 1 |
| 5698_at   | 5698   | NA PSMB9            | proteasom peptidase I      | 21 | -1.18153 | -1.41973 | -1.35207   | -1.33787 | -1.32827 | 8.875526 | 68.93857 | 4.78E-06 | 5.85E-05 | 1 |
| 57019_at  | 57019  | ENSG000001CIAPIN1   | cytokine induced apop I    | 21 | -1.27146 | -1.47554 | -1.35572   | -1.32063 | -1.4185  | 8.077858 | 170.8993 | 1.74E-07 | 6.98E-06 | 1 |
| 585_at    | 585    | ENSG000001BBS4      | Bardet-Biedl syndrome I    | 20 | -1.03733 | -1.4335  | -1.12526   | -1.5021  | -1.34681 | 5.533689 | 47.16167 | 1.87E-05 | 0.000156 | 1 |
| 64506_at  | 64506  | ENSG000001CPEB1     | cytoplasmic polyadeny I    | 31 | -1.13466 | -1.32913 | -1.14402   | -1.46265 | -1.43207 | 4.089017 | 77.70973 | 3.10E-06 | 4.36E-05 | 1 |
| 93183_at  | 93183  | ENSG000001PIGM      | phosphatidylinositol gl I  | 22 | -1.34713 | -1.3985  | -0.84391   | -1.43405 | -1.28511 | 5.290202 | 150.5373 | 2.77E-07 | 8.99E-06 | 1 |
| 55604_at  | 55604  | ENSG000001LRRC16A   | leucine rich repeat con I  | 11 | -1.18525 | -1.48662 | -1.01318   | -1.35741 | -1.13201 | 5.134238 | 121.2366 | 6.12E-07 | 1.51E-05 | 1 |
| 5627_at   | 5627   | ENSG000001PROS1     | protein S (z Secreted      | 17 | -1.10052 | -1.61311 | -0.88659   | -1.35146 | -1.32085 | 7.050471 | 80.00606 | 2.79E-06 | 4.06E-05 | 1 |
| 80213_at  | 80213  | ENSG000001TM2D3     | TM2 domain containin I     | 29 | -1.3448  | -1.48967 | -1.13789   | -1.19355 | -1.15841 | 8.071301 | 180.525  | 1.42E-07 | 6.21E-06 | 1 |
| 6150_at   | 6150   | ENSG000001MRPL23    | mitochondrial ribosom I    | 8  | -1.40438 | -1.42871 | -1.22481   | -1.20221 | -1.18364 | 10.67899 | 171.0536 | 1.73E-07 | 6.98E-06 | 1 |
| 78991_at  | 78991  | ENSG000001PCYOX1L   | prenylcyste Secreted       | 11 | -1.46111 | -1.5125  | -1.25845   | -1.29841 | -1.24119 | 7.060724 | 41.0337  | 3.07E-05 | 0.000228 | 1 |
| 27304_at  | 27304  | ENSG000001MOC53     | molbydenum cofactor I      | 20 | -1.368   | -1.59794 | -1.19693   | -1.31317 | -1.17086 | 6.635838 | 174.9986 | 1.59E-07 | 6.71E-06 | 1 |
| 79675_at  | 79675  | ENSG000001FASTKD1   | FAST kinasi kinase I       | 6  | -1.34378 | -1.57643 | -1.28911   | -1.26232 | -1.18363 | 8.260653 | 133.7564 | 4.27E-07 | 1.19E-05 | 1 |
| 221336_at | 221336 | ENSG000001BEN6D     | BEN domain containin I     | 21 | -1.15476 | -1.36704 | -1.16429   | -1.23023 | -1.01803 | 4.122513 | 44.82847 | 2.24E-05 | 0.000179 | 1 |
| 83666_at  | 83666  | ENSG000001PARP9     | poly (ADP-i Secreted       | 32 | -1.2129  | -1.47355 | -1.28972   | -1.22411 | -1.06776 | 5.466641 | 22.21068 | 0.00026  | 0.001196 | 1 |
| 4720_at   | 4720   | ENSG000001NDUFS2    | NADH dehydrogenase I       | 32 | -1.23293 | -1.33013 | -1.30045   | -1.21376 | -1.04682 | 9.605544 | 154.6046 | 2.51E-07 | 8.48E-06 | 1 |
| 79047_at  | 79047  | ENSG000001KCTD15    | potassium ion channe I     | 53 | -1.2034  | -1.37261 | -1.2885    | -1.29848 | -1.02936 | 4.291645 | 126.5225 | 5.24E-07 | 1.36E-05 | 1 |
| 8459_at   | 8459   | ENSG000001TPST2     | tyrosylpro Secreted        | 10 | -1.39741 | -1.35671 | -1.10497   | -1.24252 | -0.96094 | 8.19424  | 75.91537 | 3.37E-06 | 4.63E-05 | 1 |
| 91433_at  | 91433  | ENSG000001RCCD1     | RCC1 domain containin I    | 22 | -1.41939 | -1.28371 | -1.21132   | -1.2755  | -0.98979 | 7.343495 | 118.8706 | 6.58E-07 | 1.58E-05 | 1 |
| 151636_at | 151636 | ENSG000001DTX3L     | deltex 3-like (Drosophi I  | 33 | -1.35637 | -1.47274 | -1.14101   | -1.21269 | -0.97476 | 6.496047 | 44.29793 | 2.34E-05 | 0.000184 | 1 |
| 7277_at   | 7277   | ENSG000001TUBA4A    | tubulin, alp GTPase I      | 20 | -1.41636 | -1.48633 | -1.22085   | -1.25879 | -1.02355 | 9.464049 | 61.43725 | 7.24E-06 | 7.83E-05 | 1 |
| 84083_at  | 84083  | ENSG000001ZNRANB3   | zinc finger, RAN-bindir I  | 11 | -1.94394 | -1.89271 | -0.48608   | -1.16999 | -0.84103 | 4.310652 | 66.05048 | 5.58E-06 | 6.54E-05 | 1 |
| 6814_at   | 6814   | ENSG000001STXBP3    | syntaxin binding prote I   | 11 | -1.5565  | -1.7773  | -0.57844   | -1.10316 | -0.38069 | 8.565589 | 72.99601 | 3.88E-06 | 5.08E-05 | 1 |
| 54465_at  | 54465  | ENSG000001ETAA1     | Ewing tumor-associate I    | 11 | -1.43758 | -1.97114 | -0.49783   | -1.0183  | -0.61798 | 6.537808 | 36.01322 | 4.86E-05 | 0.000322 | 1 |
| 10610_at  | 10610  | ENSG000001ST6GALNA1 | ST6 (alpha-N-acetyl-ne I   | 11 | -1.81656 | -2.07843 | -1.10678   | -0.74861 | -0.89633 | 3.772642 | 201.2094 | 9.53E-08 | 5.15E-06 | 1 |
| 124936_at | 124936 | ENSG000001CYB5D2    | cytochrom Secreted         | 11 | -1.4627  | -1.7137  | -0.8857    | -0.57677 | -0.98779 | 6.671772 | 111.7348 | 8.25E-07 | 1.84E-05 | 1 |
| 55788_at  | 55788  | ENSG000001LMBRD1    | LMBR1 domain contain I     | 11 | -1.26849 | -1.64841 | -0.84903   | -0.8109  | -0.91602 | 8.342601 | 122.2792 | 5.93E-07 | 1.49E-05 | 1 |
| 3912_at   | 3912   | ENSG000001LAMB1     | laminin, be Secreted       | 19 | -1.34876 | -1.56095 | -0.89129   | -0.92075 | -0.86779 | 5.140095 | 100.4446 | 1.22E-06 | 2.34E-05 | 1 |
| 114907_at | 114907 | ENSG000001FBXO32    | F-box protein 32           | 8  | -2.09104 | -1.43816 | -0.64669   | -1.12962 | -0.78417 | 8.666348 | 72.7835  | 3.92E-06 | 5.12E-05 | 1 |
| 6563_at   | 6563   | ENSG000001SLC14A1   | solute carri transportei I | 29 | -1.75412 | -1.12758 | -0.71327   | -1.06936 | -0.94515 | 4.736298 | 135.2857 | 4.10E-07 | 1.15E-05 | 1 |
| 285193_at | 285193 | ENSG000001DUSP28    | dual specif phosphopr I    | 11 | -1.70888 | -1.21926 | -0.88841   | -1.06611 | -0.80376 | 6.844409 | 80.57924 | 2.71E-06 | 3.99E-05 | 1 |
| 10308_at  | 10308  | ENSG000001ZNF267    | zinc finger protein 267 I  | 31 | -1.88031 | -1.30583 | -1.28665   | -1.10071 | -0.51853 | 6.147452 | 95.81271 | 1.45E-06 | 2.59E-05 | 1 |
| 84189_at  | 84189  | ENSG000001SLITRK6   | SLIT and NTRK-like farr I  | 22 | -2.0616  | -1.4903  | -1.13134   | -1.0579  | -0.60819 | 3.831271 | 51.99999 | 1.32E-05 | 0.000121 | 1 |
| 563_at    | 563    | ENSG000001AZGP1     | alpha-2-gly Secreted       | 7  | -1.5683  | -1.65824 | -1.18041   | -1.17143 | -0.42614 | 4.983121 | 13.00759 | 0.001541 | 0.005166 | 1 |
| 25937_at  | 25937  | ENSG000001WWTR1     | WW domain containin I      | 29 | -1.67808 | -1.52655 | -1.03975   | -0.7398  | -0.46803 | 9.166341 | 90.2654  | 1.80E-06 | 3.01E-05 | 1 |
| 1910_at   | 1910   | ENSG000001EDNRB     | endothelin G-protein c I   | 39 | -1.75798 | -1.53861 | -1.11452</ |          |          |          |          |          |          |   |

|           |        |                    |                          |    |    |          |          |          |          |          |          |          |          |          |   |
|-----------|--------|--------------------|--------------------------|----|----|----------|----------|----------|----------|----------|----------|----------|----------|----------|---|
| 85377_at  | 85377  | ENSG000001MICAL1   | MICAL-like 1             | I  | 11 | -0.96979 | -1.26379 | -1.33828 | -1.0887  | -0.69103 | 7.627742 | 83.9544  | 2.34E-06 | 3.63E-05 | 1 |
| 55691_at  | 55691  | ENSG000001FRMD4A   | FERM domain containi     | I  | 30 | -0.79027 | -1.36841 | -0.91024 | -1.31938 | -0.90757 | 6.58901  | 95.24205 | 1.48E-06 | 2.63E-05 | 1 |
| 55634_at  | 55634  | ENSG000001ZNF673   | zinc finger family mem   | I  | 11 | -0.96715 | -1.51532 | -0.83067 | -1.3196  | -0.98164 | 6.457586 | 52.88493 | 1.24E-05 | 0.000116 | 1 |
| 9096_at   | 9096   | ENSG000001TBX18    | T-box 18                 | I  | 22 | -0.89087 | -1.51991 | -0.98465 | -1.40874 | -0.91357 | 3.976324 | 79.42703 | 2.86E-06 | 4.13E-05 | 1 |
| 2161_at   | 2161   | ENSG000001F12      | coagulation peptidase    | I  | 10 | -1.22724 | -1.2086  | -1.06927 | -1.29679 | -1.07519 | 6.07781  | 86.72331 | 2.08E-06 | 3.33E-05 | 1 |
| 55009_at  | 55009  | ENSG000001C19orf24 | chromosome 19 open       | I  | 11 | -1.00282 | -1.17796 | -1.18977 | -1.18212 | -1.17297 | 8.749613 | 107.4538 | 9.52E-07 | 2.02E-05 | 1 |
| 1201_at   | 1201   | ENSG000001CLN3     | ceroid-lipofuscinosis, f | I  | 65 | -0.97154 | -1.21463 | -1.10521 | -1.30207 | -1.26628 | 5.921713 | 87.29443 | 2.03E-06 | 3.28E-05 | 1 |
| 80185_at  | 80185  | ENSG000001C8orf41  | chromosome 8 open r      | I  | 38 | -0.9198  | -1.35755 | -1.27617 | -1.22454 | -1.04648 | 6.302412 | 150.8291 | 2.75E-07 | 8.96E-06 | 1 |
| 10609_at  | 10609  | NA                 | LEPREL4                  | I  | 27 | -1.0123  | -1.41437 | -1.36448 | -1.24186 | -0.99037 | 5.689241 | 109.3519 | 8.93E-07 | 1.95E-05 | 1 |
| 151613_at | 151613 | ENSG000001TTC14    | tetratricopeptide repe   | I  | 19 | -1.08916 | -1.43177 | -1.23238 | -1.32959 | -0.82963 | 7.264021 | 125.3    | 5.43E-07 | 1.40E-05 | 1 |
| 2180_at   | 2180   | ENSG000001ACSL1    | acyl-CoA synthetase lo   | I  | 22 | -1.00277 | -1.42024 | -1.08938 | -1.21081 | -0.81951 | 6.843417 | 85.87935 | 2.15E-06 | 3.42E-05 | 1 |
| 65258_at  | 65258  | ENSG000001MPPE1    | metallophosphoesterase   | I  | 21 | -0.96672 | -1.39226 | -1.1419  | -1.33941 | -0.95585 | 4.772885 | 127.0505 | 5.16E-07 | 1.35E-05 | 1 |
| 23317_at  | 23317  | ENSG000001DNAJC13  | DnaJ (Hsp40) homolog     | I  | 11 | -1.09293 | -1.5731  | -0.67594 | -1.17879 | -0.40435 | 6.269562 | 123.3367 | 5.75E-07 | 1.46E-05 | 1 |
| 55773_at  | 55773  | ENSG000001TBC1D23  | TBC1 dom                 | I  | 20 | -1.22849 | -1.77711 | -0.89177 | -0.97287 | -0.64039 | 7.608825 | 110.9281 | 8.47E-07 | 1.88E-05 | 1 |
| 137392_at | 137392 | ENSG000001FAM92A1  | family with sequence s   | I  | 4  | -1.29263 | -1.68633 | -0.96741 | -0.95061 | -0.34543 | 8.255903 | 28.02448 | 0.000117 | 0.000637 | 1 |
| 6840_at   | 6840   | ENSG000001SVIL     | supervillin              | I  | 30 | -1.38501 | -1.64027 | -1.00064 | -0.88861 | -0.42635 | 8.384683 | 103.6887 | 1.08E-06 | 2.19E-05 | 1 |
| 28981_at  | 28981  | ENSG000001IFT81    | intraflagellar transport | I  | 21 | -1.01404 | -1.58654 | -0.80495 | -0.89403 | -0.51573 | 8.466403 | 95.89002 | 1.44E-06 | 2.59E-05 | 1 |
| 10165_at  | 10165  | ENSG000001SLC25A13 | solute carr              | I  | 29 | -0.89734 | -1.41282 | -0.94083 | -1.0201  | -0.58743 | 6.970395 | 81.67336 | 2.58E-06 | 3.85E-05 | 1 |
| 256356_at | 256356 | ENSG000001GK5      | glycerol kir kinase      | NI | 19 | -0.90213 | -1.3919  | -0.98416 | -0.77926 | -0.39978 | 4.364063 | 49.29229 | 1.60E-05 | 0.00014  | 1 |
| 51010_at  | 51010  | ENSG000001EXOSC3   | exosome component 3      | NI | 13 | -0.91445 | -1.34948 | -0.9209  | -0.92643 | -0.34841 | 6.523508 | 47.21766 | 1.86E-05 | 0.000156 | 1 |
| 7993_at   | 7993   | NA                 | UBXN8                    | I  | 18 | -0.98418 | -1.32821 | -0.89544 | -0.92243 | -0.46395 | 7.642439 | 76.22483 | 3.32E-06 | 4.59E-05 | 1 |
| 800_at    | 800    | ENSG000001CALD1    | caldesmon 1              | I  | 96 | -1.03686 | -1.45082 | -1.17738 | -0.9796  | -0.32486 | 6.601505 | 112.3214 | 8.10E-07 | 1.82E-05 | 1 |
| 51163_at  | 51163  | ENSG000001DBR1     | debranchin               | I  | 11 | -1.11893 | -1.54834 | -1.14058 | -0.90939 | -0.4094  | 5.545371 | 27.67245 | 0.000122 | 0.000659 | 1 |
| 6909_at   | 6909   | ENSG000001TBX2     | T-box 2                  | NI | 11 | -0.86192 | -1.547   | -1.11574 | -0.95677 | -0.57905 | 3.863621 | 20.02559 | 0.00037  | 0.001592 | 1 |
| 641_at    | 641    | ENSG000001BLM      | Bloom syndrome, Recf     | I  | 11 | -0.95461 | -1.57543 | -1.19863 | -1.03681 | -0.64543 | 7.340231 | 96.57322 | 1.40E-06 | 2.55E-05 | 1 |
| 7586_at   | 7586   | ENSG000001ZKSCAN1  | zinc finger with KRAB    | I  | 53 | -1.08871 | -1.47891 | -0.92756 | -1.22728 | -0.57777 | 4.871544 | 55.11275 | 1.07E-05 | 0.000104 | 1 |
| 8458_at   | 8458   | ENSG000001TTF2     | transcription terminati  | I  | 39 | -1.11063 | -1.62613 | -1.03414 | -1.2107  | -0.59685 | 7.223183 | 159.7403 | 2.23E-07 | 8.02E-06 | 1 |
| 23008_at  | 23008  | ENSG000001KLHDC10  | kelch domain containi    | I  | 39 | -1.04494 | -1.506   | -1.17289 | -1.14723 | -0.66397 | 5.468656 | 98.48446 | 1.31E-06 | 2.42E-05 | 1 |
| 56886_at  | 56886  | ENSG000001UGGT1    | UDP-glucos               | I  | 31 | -1.15327 | -1.49724 | -1.1084  | -1.21299 | -0.69655 | 5.721418 | 158.6031 | 2.29E-07 | 8.07E-06 | 1 |
| 54956_at  | 54956  | ENSG000001PARP16   | poly (ADP-ribose) poly   | I  | 11 | -0.94008 | -1.74343 | -1.16966 | -1.07312 | -1.10526 | 5.636329 | 97.83917 | 1.34E-06 | 2.47E-05 | 1 |
| 117145_at | 117145 | ENSG000001THEM4    | thioesterase superfam    | I  | 10 | -1.1684  | -1.87242 | -1.06985 | -1.00431 | -0.97959 | 5.854179 | 55.43464 | 1.05E-05 | 0.000102 | 1 |
| 83943_at  | 83943  | ENSG000001IMMP2L   | IMMP2 inner peptidase    | I  | 11 | -1.41014 | -1.82402 | -0.96804 | -1.2397  | -0.68626 | 6.519115 | 45.04721 | 2.20E-05 | 0.000177 | 1 |
| 54875_at  | 54875  | ENSG000001CNTLN    | centlein, ce kinase      | I  | 30 | -1.29972 | -1.85254 | -1.00179 | -1.35247 | -0.81733 | 4.047795 | 53.35639 | 1.20E-05 | 0.000113 | 1 |
| 8548_at   | 8548   | ENSG000001BLZF1    | basic leucine zipper nu  | I  | 22 | -1.17195 | -1.65316 | -1.09265 | -1.40324 | -0.92381 | 4.996364 | 64.2741  | 6.15E-06 | 7.01E-05 | 1 |
| 523_at    | 523    | ENSG000001ATPGV1A  | ATPase, H+               | I  | 52 | -1.19188 | -1.67857 | -1.15353 | -1.20275 | -0.80359 | 7.309011 | 177.7801 | 1.50E-07 | 6.45E-06 | 1 |
| 64222_at  | 64222  | ENSG000001TOR3A    | torsin fami              | I  | 16 | -1.31822 | -1.63336 | -1.11922 | -1.27119 | -0.79758 | 6.480223 | 73.25035 | 3.84E-06 | 5.03E-05 | 1 |
| 51319_at  | 51319  | ENSG000001RSRC1    | arginine/serine-rich co  | I  | 10 | -1.23242 | -1.16593 | -0.89177 | -1.12577 | -0.70447 | 7.633389 | 74.20658 | 3.66E-06 | 4.88E-05 | 1 |
| 80119_at  | 80119  | ENSG000001PIF1     | PIF1 5'-to-3' DNA helic  | I  | 11 | -1.09814 | -1.24592 | -0.93006 | -1.36211 | -0.75054 | 7.113818 | 144.5533 | 3.21E-07 | 9.91E-06 | 1 |
| 57568_at  | 57568  | ENSG000001SIPA1L2  | signal-induced prolifer  | I  | 33 | -1.35661 | -1.42097 | -0.70298 | -1.15913 | -1.06023 | 4.387966 | 25.33841 | 0.000166 | 0.000833 | 1 |
| 5567_at   | 5567   | ENSG000001PRKACB   | protein kin kinase       | I  | 44 | -1.09987 | -1.52991 | -0.87799 | -1.07659 | -0.99112 | 4.212548 | 142.511  | 3.39E-07 | 1.02E-05 | 1 |
| 374659_at | 374659 | ENSG000001HDDC3    | HD domain containing     | I  | 11 | -1.23916 | -1.4853  | -0.94133 | -1.12377 | -0.92104 | 7.557963 | 138.315  | 3.78E-07 | 1.09E-05 | 1 |
| 196394_at | 196394 | ENSG000001AMN1     | antagonist of mitotic c  | I  | 21 | -1.13743 | -1.29308 | -0.74367 | -1.19174 | -0.97438 | 5.303583 | 24.53477 | 0.000185 | 0.000911 | 1 |
| 7372_at   | 7372   | ENSG000001UMPS     | uridine monophosphat     | I  | 33 | -1.10445 | -1.34244 | -0.95112 | -1.08089 | -0.93215 | 7.010716 | 116.163  | 7.16E-07 | 1.67E-05 | 1 |
| 2791_at   | 2791   | ENSG000001GNG11    | guanine nu GTPase        | I  | 10 | -1.00507 | -1.28697 | -0.86724 | -1.11657 | -0.90841 | 11.31624 | 72.03518 | 4.07E-06 | 5.24E-05 | 1 |
| 79659_at  | 79659  | ENSG000001DYNC2H1  | dynein, cytoplasmic 2,   | I  | 11 | -1.06799 | -1.32504 | -0.79809 | -1.04449 | -0.98161 | 6.846794 | 21.93937 | 0.000272 | 0.001241 | 1 |
| 157570_at | 157570 | ENSG000001ESCO2    | establishment of cohe    | I  | 11 | -1.38011 | -1.35895 | -0.78972 | -0.95111 | -0.51483 | 8.507104 | 72.73523 | 3.93E-06 | 5.13E-05 | 1 |
| 64746_at  | 64746  | ENSG000001ACBD3    | acyl-CoA binding domi    | I  | 21 | -1.37062 | -1.31437 | -0.82987 | -1.06275 | -0.59927 | 6.918018 | 110.7238 | 8.53E-07 | 1.89E-05 | 1 |
| 9839_at   | 9839   | ENSG000001ZEB2     | zinc finger E-box bindi  | NI | 11 | -1.38183 | -1.45337 | -0.64905 | -0.95706 | -0.64388 | 3.841364 | 18.08011 | 0.000522 | 0.002107 | 1 |
| 5934_at   | 5934   | ENSG000001RBL2     | retinoblastoma-like 2 (  | I  | 36 | -1.41349 | -1.43787 | -0.58071 | -1.0453  | -0.75887 | 5.040327 | 90.76953 | 1.76E-06 | 2.97E-05 | 1 |
| 5264_at   | 5264   | ENSG000001PHYH     | phytanoyl-CoA 2-hydr     | I  | 9  | -1.43536 | -1.51882 | -0.6458  | -0.97707 | -0.78366 | 8.467888 | 99.42521 | 1.26E-06 | 2.38E-05 | 1 |
| 116448_at | 116448 | ENSG000001OLIG1    | oligodendrocyte trans    | NI | 11 | -1.15412 | -1.32393 | -0.58292 | -0.81445 | -0.87036 | 3.602937 | 90.28221 | 1.80E-06 | 3.01E-05 | 1 |
| 5558_at   | 5558   | NA                 | PRIM2                    | I  | 8  | -1.1767  | -1.19223 | -0.70352 | -0.88604 | -0.93878 | 6.236575 | 65.08672 | 5.88E-06 | 6.81E-05 | 1 |
| 90_at     | 90     | ENSG000001ACVR1    | activin A re kinase      | I  | 42 | -1.27182 | -1.26876 | -0.74884 | -0.95487 | -0.93358 | 6.161681 | 99.3572  | 1.27E-06 | 2.38E-05 | 1 |
| 11046_at  | 11046  | ENSG000001SLC35D2  | solute carr              | I  | 11 | -1.34812 | -1.35601 | -0.81792 | -0.77316 | -0.98701 | 7.371456 | 45.08802 | 2.19E-05 | 0.000177 | 1 |
| 83479_at  | 83479  | ENSG000001DDX59    | DEAD (Asp-Glu-Ala-As)    | I  | 42 | -1.39037 | -1.16145 | -0.83869 | -0.78685 | -0.86411 | 6.455783 | 121.944  | 5.99E-07 | 1.50E-05 | 1 |
| 57103_at  | 57103  | ENSG000001C12orf5  | chromosome 12 open       | I  | 21 | -1.39147 | -1.22387 | -0.82093 | -0.78336 | -0.95928 | 5.764493 | 122.8201 | 5.84E-07 | 1.47E-05 | 1 |
| 3790_at   | 3790   | ENSG000001KCNS3    | potassium ion channe     | I  | 11 | -1.25708 | -1.2912  | -1.03447 | -0.99968 | -0.54084 | 6.704539 | 60.63302 | 7.59E-06 | 8.07E-05 | 1 |
| 1854_at   | 1854   | ENSG000001DUT      | deoxyuridine triphosph   | I  | 35 | -1.38208 | -1.35203 | -1.05816 | -1.10688 | -0.54057 | 8.019125 | 120.3929 | 6.28E-07 | 1.53E-05 | 1 |
| 116496_at | 116496 | ENSG000001FAM129A  | family with sequence s   | I  | 33 | -1.36476 | -1.47047 | -0.93686 | -1.09228 | -0.63934 | 7.420998 | 26.7686  | 0.000137 | 0.00072  | 1 |
| 11073_at  | 11073  | ENSG000001TOPBP1   | topoisomerase (DNA) II   | I  | 16 | -1.3698  | -1.38171 | -1.05011 | -1.21333 | -0.68166 | 9.016922 | 101.6324 | 1.17E-06 | 2.27E-05 | 1 |
| 4644_at   | 4644   | ENSG000001MYO5A    | myosin VA (heavy chai    | I  | 22 | -1.33805 | -1.60531 | -1.0291  | -1.01274 | -0.68432 | 7.217796 | 35.2044  | 5.27E-05 | 0.000343 | 1 |
| 83879_at  | 83879  | ENSG000001CDA7     | cell division cycle asso | I  | 20 | -1.35733 | -1.54251 | -1.07841 | -1.12385 | -0.75287 | 6.78447  | 106.8925 | 9.70E-07 | 2.04E-05 | 1 |
| 84191_at  | 84191  | ENSG000001FAM96A   | family with sequence s   | I  | 14 | -1.46657 | -1.56357 | -1.03584 | -1.02305 | -0.53425 | 9.815261 | 113.6228 | 7.76E-07 | 1.77E-05 | 1 |
| 10550_at  | 10550  | ENSG000001ARL6IP5  | ADP-ribosylation-like f  | I  | 35 | -1.49713 | -1.48587 | -1.129   | -0.97663 | -0.6864  | 10.35804 | 163.2964 | 2.05E-07 | 7.66E-06 | 1 |
| 58499_at  | 58499  | ENSG000001ZNF462   | zinc finger protein 462  | I  | 21 | -1.5027  | -1.4159  | -1.01582 | -1.02089 | -0.57747 | 7.175845 | 142.8635 | 3.36E-07 | 1.01E-05 | 1 |
| 57149_at  | 57149  | ENSG000001LYRM1    | LYR motif containing 1   | I  | 22 | -1.58949 | -1.49    | -1.0499  | -1.08696 | -0.61985 | 7.602437 | 89.33179 | 1.87E-06 | 3.07E-05 | 1 |
| 55215_at  | 55215  | ENSG000001FANCI    | Fanconi anemia, comp     | I  | 27 | -1.32595 | -1.41361 | -1.25998 | -1.12914 | -0.85138 | 7.611887 | 136.2786 | 3.99E-07 | 1.13E-05 | 1 |
| 56683_at  | 56683  | ENSG000001C21orf59 | chromosome 21 open       | I  | 21 | -1.29849 | -1.56017 | -1.24148 | -1.16358 | -0.83032 | 10.13973 | 181.4594 | 1.39E-07 | 6.18E-06 | 1 |
|           |        |                    |                          |    |    |          |          |          |          |          |          |          |          |          |   |

|           |        |                    |                                   |    |     |          |          |          |          |          |          |          |          |          |   |
|-----------|--------|--------------------|-----------------------------------|----|-----|----------|----------|----------|----------|----------|----------|----------|----------|----------|---|
| 3707_at   | 3707   | ENSG000001ITPKB    | inositol-tris kinase              | I  | 20  | -0.92293 | -1.06426 | -1.10406 | -1.17582 | -1.95858 | 5.369961 | 101.2374 | 1.18E-06 | 2.29E-05 | 1 |
| 4908_at   | 4908   | ENSG000001NTF3     | neurotroph Secreted               | NI | 11  | -1.00753 | -1.35927 | -0.8551  | -1.27823 | -1.98601 | 4.581624 | 103.5728 | 1.09E-06 | 2.19E-05 | 1 |
| 3012_at   | 3012   | NA                 | HIST1H2AE histone cluster 1, H2ae | NI | 22  | -0.76407 | -1.19008 | -0.96427 | -0.79259 | -1.52936 | 4.181893 | 73.44758 | 3.80E-06 | 5.00E-05 | 1 |
| 770_at    | 770    | ENSG000001CA11     | carbonic ar Secreted              | NI | 7   | -1.10283 | -1.10559 | -0.95391 | -0.96731 | -1.68363 | 5.270783 | 34.96006 | 5.40E-05 | 0.000349 | 1 |
| 26270_at  | 26270  | ENSG000001FBX06    | F-box protein 6                   | I  | 10  | -1.11509 | -1.23804 | -1.00113 | -0.90818 | -1.65913 | 5.050532 | 73.28647 | 3.83E-06 | 5.03E-05 | 1 |
| 126295_at | 126295 | ENSG000001ZNF57    | zinc finger protein 57            | I  | 11  | -1.09462 | -1.21098 | -1.0987  | -0.96389 | -1.67556 | 5.675882 | 146.3872 | 3.07E-07 | 9.69E-06 | 1 |
| 9638_at   | 9638   | ENSG000001FEZ1     | fasciculation and elong           | NI | 32  | -1.28058 | -1.44326 | -0.71796 | -0.96997 | -1.54297 | 4.19493  | 104.7499 | 1.04E-06 | 2.13E-05 | 1 |
| 1369_at   | 1369   | ENSG000001CPN1     | carboxypeptidase                  | NI | 10  | -0.86371 | -1.52883 | -0.87632 | -1.04599 | -1.55903 | 4.128206 | 29.9284  | 9.31E-05 | 0.000534 | 1 |
| 9170_at   | 9170   | ENSG000001LPAR2    | lysophosph G-protein c            | I  | 11  | -1.02373 | -1.50149 | -1.1273  | -1.01635 | -1.52673 | 5.195255 | 68.85024 | 4.80E-06 | 5.87E-05 | 1 |
| 27148_at  | 27148  | ENSG000001STK36    | serine/thre kinase                | I  | 11  | -1.11116 | -1.46558 | -1.18625 | -1.04083 | -1.42364 | 6.245923 | 43.05172 | 2.59E-05 | 0.0002   | 1 |
| 79873_at  | 79873  | ENSG000001NUDT18   | nudix (nucl Secreted)             | I  | 11  | -0.79954 | -0.69435 | -1.01855 | -0.98122 | -1.8703  | 4.68397  | 72.30485 | 4.02E-06 | 5.20E-05 | 1 |
| 400566_at | 400566 | NA                 | C17orf97 chromosome 17 open       | NI | 11  | -0.69495 | -0.65548 | -1.45527 | -1.32367 | -1.58273 | 4.747592 | 115.9189 | 7.21E-07 | 1.68E-05 | 1 |
| 55423_at  | 55423  | ENSG000001SIRPG    | signal-regulatory prote           | I  | 22  | -0.88794 | -0.7609  | -1.42492 | -1.18804 | -1.38201 | 4.104054 | 32.55747 | 6.93E-05 | 0.000423 | 1 |
| 55190_at  | 55190  | ENSG000001NUDT11   | nudix (nucleoside diph            | I  | 11  | -0.89493 | -0.59186 | -1.48613 | -1.17882 | -1.54121 | 4.528132 | 64.27215 | 6.15E-06 | 7.01E-05 | 1 |
| 6233_at   | 6233   | ENSG000001RPS27A   | ribosomal protein S27             | I  | 8   | -1.03489 | -0.76487 | -1.76179 | -1.39235 | -1.26228 | 4.89141  | 23.67244 | 0.000209 | 0.001006 | 1 |
| 57491_at  | 57491  | ENSG000001AHRR     | aryl-hydrocarbon recej            | NI | 22  | -1.0918  | -0.67649 | -1.61201 | -1.21346 | -0.93418 | 5.101088 | 101.3203 | 1.18E-06 | 2.29E-05 | 1 |
| 24146_at  | 24146  | ENSG000001CLDN15   | claudin 15                        | I  | 9   | -1.02271 | -0.71332 | -1.56112 | -1.00155 | -0.92046 | 6.349237 | 14.20249 | 0.001159 | 0.004074 | 1 |
| 6764_at   | 6764   | ENSG000001ST5      | suppression of tumorig            | I  | 28  | -1.01562 | -0.90281 | -1.57769 | -0.94987 | -1.0323  | 4.691675 | 80.38126 | 2.74E-06 | 4.01E-05 | 1 |
| 57190_at  | 57190  | ENSG000001SEPN1    | selenoprot Secreted               | NI | 11  | -1.22115 | -0.39952 | -1.27718 | -1.09451 | -1.11686 | 5.252872 | 23.67448 | 0.000209 | 0.001006 | 1 |
| 11182_at  | 11182  | NA                 | SLC2A6 solute carri transporte    | I  | 29  | -0.87357 | -0.51103 | -1.42737 | -1.04518 | -1.15365 | 7.021073 | 27.15635 | 0.00013  | 0.000693 | 1 |
| 4582_at   | 4582   | ENSG000001MUC1     | mucin 1, ce Secreted              | NI | 109 | -1.00894 | -0.6563  | -1.43325 | -0.98898 | -1.10725 | 4.756621 | 123.6992 | 5.69E-07 | 1.45E-05 | 1 |
| 29780_at  | 29780  | ENSG000001PARVB    | parvin, beta                      | I  | 8   | -1.27321 | -0.5306  | -1.2866  | -1.34662 | -1.54491 | 4.224462 | 37.74046 | 4.12E-05 | 0.000285 | 1 |
| 284615_at | 284615 | ENSG000001ANKRD34A | ankyrin repeat domain             | NI | 11  | -1.10609 | -0.50007 | -1.05849 | -1.12699 | -1.34498 | 4.260593 | 29.78739 | 9.46E-05 | 0.000541 | 1 |
| 54913_at  | 54913  | ENSG000001RPP25    | ribonuclease P/MRP 2              | I  | 11  | -1.30578 | -0.71295 | -1.17545 | -1.05337 | -1.40631 | 6.247441 | 35.50348 | 5.11E-05 | 0.000336 | 1 |
| 56477_at  | 56477  | ENSG000001CCL28    | chemokine Secreted                | I  | 13  | -1.13496 | -0.98689 | -1.22573 | -1.4555  | -1.39722 | 4.510903 | 43.66819 | 2.46E-05 | 0.000192 | 1 |
| 80227_at  | 80227  | ENSG000001PAAF1    | proteasomal ATPase-a              | I  | 28  | -1.41439 | -1.02011 | -1.29162 | -1.27781 | -1.28271 | 7.965347 | 64.85449 | 5.96E-06 | 6.86E-05 | 1 |
| 80210_at  | 80210  | ENSG000001ARMC9    | armadillo repeat conta            | I  | 9   | -1.46755 | -1.06574 | -1.15149 | -1.44253 | -1.37518 | 6.864694 | 57.88341 | 8.97E-06 | 9.13E-05 | 1 |
| 55620_at  | 55620  | ENSG000001STAP2    | signal transducing ada            | I  | 19  | -1.27902 | -1.04154 | -1.16196 | -1.14792 | -1.26902 | 6.750773 | 135.9842 | 4.02E-07 | 1.13E-05 | 1 |
| 10069_at  | 10069  | ENSG000001RWD2B    | RWD domain containir              | I  | 11  | -1.23974 | -1.01795 | -1.14422 | -1.14615 | -1.39797 | 8.045107 | 55.03958 | 1.07E-05 | 0.000104 | 1 |
| 6713_at   | 6713   | ENSG000001SQLE     | squalene epoxidase                | I  | 33  | -1.20988 | -1.04338 | -1.30759 | -1.25002 | -1.29391 | 7.513261 | 16.86733 | 0.000658 | 0.002549 | 1 |
| 26276_at  | 26276  | ENSG000001VPS33B   | vacuolar protein sortin           | I  | 18  | -1.14315 | -1.02151 | -1.29053 | -1.17968 | -1.4357  | 6.971407 | 122.4647 | 5.90E-07 | 1.48E-05 | 1 |
| 10514_at  | 10514  | ENSG000001MYBBP1A  | MYB binding protein (f            | I  | 50  | -1.14208 | -1.09521 | -1.2173  | -1.19121 | -1.43684 | 6.309084 | 148.8618 | 2.89E-07 | 9.25E-06 | 1 |
| 57447_at  | 57447  | ENSG000001NDRG2    | NRG family member                 | I  | 22  | -1.46572 | -0.74623 | -1.35878 | -1.41446 | -1.26154 | 5.166235 | 141.0801 | 3.51E-07 | 1.04E-05 | 1 |
| 348801_at | 348801 | ENSG000001LNP1     | leukemia NUP98 fusio              | I  | 11  | -1.52031 | -0.67136 | -1.44333 | -1.39792 | -1.34257 | 5.476776 | 19.3618  | 0.000415 | 0.001747 | 1 |
| 2817_at   | 2817   | ENSG000001GPC1     | glypican 1 Secreted               | I  | 21  | -1.44758 | -1.06983 | -1.6229  | -1.00604 | -1.44563 | 4.640304 | 63.57863 | 6.40E-06 | 7.19E-05 | 1 |
| 23616_at  | 23616  | ENSG000001SH3BP1   | SH3-domai Secreted                | I  | 32  | -1.50313 | -1.11406 | -1.49833 | -1.08691 | -1.61304 | 5.481538 | 94.73603 | 1.51E-06 | 2.67E-05 | 1 |
| 25911_at  | 25911  | ENSG000001DPCD     | deleted in primary cilic          | I  | 9   | -1.44402 | -1.204   | -1.46484 | -1.30528 | -1.54338 | 8.641375 | 189.49   | 1.19E-07 | 5.63E-06 | 1 |
| 5092_at   | 5092   | ENSG000001PCBD1    | pterin-4 alpha-carbino            | I  | 10  | -1.30892 | -1.22801 | -1.53969 | -1.40303 | -1.57883 | 7.808601 | 67.61561 | 5.12E-06 | 6.15E-05 | 1 |
| 1020_at   | 1020   | ENSG000001CDK5     | cyclin-depe kinase                | I  | 13  | -1.59685 | -1.18486 | -1.51213 | -1.23664 | -1.44223 | 7.730608 | 57.49198 | 9.19E-06 | 9.30E-05 | 1 |
| 283537_at | 283537 | ENSG000001SLC46A3  | solute carrier family 4           | I  | 11  | -1.63788 | -1.154   | -1.56907 | -1.42861 | -1.62377 | 6.167916 | 134.1692 | 4.22E-07 | 1.18E-05 | 1 |
| 241_at    | 241    | ENSG000001ALOX5AP  | arachidonate 5-lipoxye            | NI | 10  | -1.1082  | -1.79664 | -1.85578 | -0.88702 | -0.87911 | 4.881957 | 18.37573 | 0.000495 | 0.002019 | 1 |
| 375035_at | 375035 | ENSG000001SFT2D2   | SFT2 domain containin             | I  | 9   | -1.25995 | -1.93874 | -1.63376 | -1.10964 | -0.79448 | 4.744987 | 97.07049 | 1.38E-06 | 2.51E-05 | 1 |
| 30849_at  | 30849  | ENSG000001PIK3R4   | phosphoin kinase                  | I  | 10  | -1.26802 | -1.86792 | -1.39486 | -1.26512 | -0.95591 | 8.032766 | 222.4044 | 6.59E-08 | 4.12E-06 | 1 |
| 10451_at  | 10451  | ENSG000001VAV3     | vav 3 guanine nucleoti            | I  | 54  | -1.41289 | -1.3788  | -1.44207 | -1.10377 | -0.83752 | 4.683607 | 158.6594 | 2.28E-07 | 8.07E-06 | 1 |
| 10521_at  | 10521  | ENSG000001DDX17    | DEAD (Asp-Glu-Ala-As              | I  | 30  | -1.24859 | -1.25035 | -1.42258 | -1.15695 | -0.72776 | 5.771296 | 142.1669 | 3.42E-07 | 1.02E-05 | 1 |
| 55740_at  | 55740  | ENSG000001ENAH     | enabled homolog (Dro              | I  | 28  | -1.28352 | -1.37101 | -1.43336 | -1.09184 | -0.75901 | 5.058603 | 105.975  | 1.00E-06 | 2.08E-05 | 1 |
| 84734_at  | 84734  | ENSG000001FAM167B  | family with sequence s            | I  | 11  | -1.16133 | -1.26438 | -1.58666 | -1.14904 | -0.85591 | 4.524176 | 42.56929 | 2.69E-05 | 0.000206 | 1 |
| 115509_at | 115509 | ENSG000001ZNF689   | zinc finger protein 689           | I  | 11  | -1.1156  | -1.42715 | -1.55832 | -1.26132 | -0.73256 | 5.890034 | 158.5252 | 2.29E-07 | 8.07E-06 | 1 |
| 81875_at  | 81875  | ENSG000001ISG20L2  | interferon stimulated             | I  | 7   | -1.11434 | -1.41702 | -1.55889 | -1.2775  | -0.9166  | 8.628371 | 134.4698 | 4.19E-07 | 1.17E-05 | 1 |
| 10478_at  | 10478  | ENSG000001SLC25A17 | solute carri transporte           | I  | 21  | -1.11011 | -1.33076 | -1.39089 | -1.04015 | -1.05505 | 6.651799 | 170.2799 | 1.76E-07 | 7.03E-06 | 1 |
| 898_at    | 898    | ENSG000001CCNE1    | cyclin E1                         | I  | 22  | -1.17004 | -1.3826  | -1.40719 | -1.02029 | -1.01472 | 6.394048 | 168.4302 | 1.83E-07 | 7.15E-06 | 1 |
| 29990_at  | 29990  | ENSG000001PILRB    | paired immunogloblin-             | I  | 31  | -1.32203 | -1.39027 | -1.33249 | -1.05186 | -1.06548 | 6.902391 | 68.00742 | 5.02E-06 | 6.06E-05 | 1 |
| 55157_at  | 55157  | ENSG000001DARS2    | aspartyl-tRNA synthet             | I  | 21  | -1.38805 | -1.37556 | -1.46164 | -1.08453 | -1.00271 | 7.356513 | 144.3071 | 3.23E-07 | 9.92E-06 | 1 |
| 51115_at  | 51115  | ENSG000001FAM82B   | family with sequence s            | I  | 16  | -1.08341 | -1.54076 | -1.36594 | -1.24943 | -1.06039 | 8.402963 | 100.3861 | 1.22E-06 | 2.34E-05 | 1 |
| 526_at    | 526    | ENSG000001ATP6V1B2 | ATPase, H+ transporte             | I  | 28  | -1.23286 | -1.50219 | -1.40909 | -1.11631 | -1.04109 | 8.744675 | 102.2404 | 1.14E-06 | 2.24E-05 | 1 |
| 5873_at   | 5873   | ENSG000001RAB27A   | RAB27A, m GTPase                  | I  | 59  | -1.25332 | -1.54196 | -1.34357 | -1.34332 | -0.92616 | 7.817301 | 106.8835 | 9.70E-07 | 2.04E-05 | 1 |
| 54471_at  | 54471  | ENSG000001SMCR7L   | Smith-Mag Secreted                | I  | 33  | -1.23587 | -1.55191 | -1.42528 | -1.28047 | -1.10326 | 7.671192 | 200.0584 | 9.74E-08 | 5.17E-06 | 1 |
| 9319_at   | 9319   | ENSG000001TRIP13   | thyroid hormone recej             | I  | 21  | -1.3443  | -1.49194 | -1.43294 | -1.28747 | -1.09838 | 8.32659  | 148.2841 | 2.93E-07 | 9.35E-06 | 1 |
| 8877_at   | 8877   | ENSG000001SPHK1    | sphingosin kinase                 | I  | 11  | -0.61578 | -1.28825 | -1.62806 | -1.39853 | -1.21175 | 6.193024 | 91.2299  | 1.73E-06 | 2.94E-05 | 1 |
| 3399_at   | 3399   | ENSG000001ID3      | inhibitor of Secreted             | I  | 28  | -0.75602 | -1.54468 | -1.57964 | -1.6297  | -1.17418 | 5.877729 | 23.10302 | 0.000228 | 0.001075 | 1 |
| 1244_at   | 1244   | ENSG000001ABCC2    | ATP-bindin transporte             | I  | 10  | -0.7281  | -1.51231 | -1.27123 | -1.53326 | -1.42116 | 4.859828 | 74.42897 | 3.62E-06 | 4.85E-05 | 1 |
| 8764_at   | 8764   | ENSG000001TNFRSF14 | tumor necrosis factor             | I  | 56  | -0.85108 | -1.43614 | -1.51568 | -1.4904  | -1.42368 | 5.315222 | 159.1209 | 2.26E-07 | 8.07E-06 | 1 |
| 90853_at  | 90853  | ENSG000001SPOCD1   | SPOC domain containi              | I  | 11  | -0.89685 | -1.67747 | -1.54079 | -1.4346  | -1.53252 | 5.957371 | 87.70606 | 1.99E-06 | 3.23E-05 | 1 |
| 55080_at  | 55080  | ENSG000001TAPBPL   | TAP binding protein-lik           | I  | 20  | -0.85825 | -1.74412 | -1.61193 | -1.48781 | -1.49297 | 5.053431 | 95.75618 | 1.45E-06 | 2.59E-05 | 1 |
| 3214_at   | 3214   | ENSG000001HOXB4    | homeobox B4                       | I  | 19  | -1.32797 | -1.31478 | -1.84369 | -1.58001 | -1.34747 | 4.711696 | 67.52183 | 5.15E-06 | 6.16E-05 | 1 |
| 3305_at   | 3305   | NA                 | HSPA1L heat shock 70kDa prot      | I  | 11  | -1.19725 | -1.53138 | -1.81441 | -1.04664 | -1.21728 | 4.664833 | 63.44822 | 6.45E-06 | 7.24E-05 | 1 |
| 10171_at  | 10171  | ENSG000001RCL1     | RNA terminal phosphat             | I  | 9   | -1.11774 | -1.33211 | -1.83368 | -1.3122  | -1.37963 | 6.690697 | 107.8896 | 9.38E-07 | 2.00E-05 | 1 |
| 148523_at | 148523 | ENSG000001C1orf51  | chromosome 1 open r               | I  | 11  | -1.36451 | -1.34188 | -1.82976 | -1.12419 | -1.48846 | 5.107459 | 129.5858 | 4.80E-07 | 1.       |   |

|           |        |                    |                          |    |    |          |          |          |          |          |          |           |          |          |   |
|-----------|--------|--------------------|--------------------------|----|----|----------|----------|----------|----------|----------|----------|-----------|----------|----------|---|
| 83660_at  | 83660  | ENSG000001TLN2     | talin 2                  | I  | 22 | -1.09209 | -1.3288  | -1.37178 | -1.19835 | -1.50506 | 4.958235 | 83.51352  | 2.38E-06 | 3.66E-05 | 1 |
| 9129_at   | 9129   | ENSG000001PRPF3    | PRP3 pre-mRNA process    | I  | 10 | -1.22679 | -1.17273 | -1.35628 | -1.11471 | -1.10909 | 6.858276 | 43.87853  | 2.42E-05 | 0.000189 | 1 |
| 55127_at  | 55127  | ENSG000001HEATR1   | HEAT repeat containin    | I  | 20 | -1.19387 | -1.21796 | -1.35871 | -1.2858  | -1.06931 | 8.370507 | 108.5486  | 9.17E-07 | 1.98E-05 | 1 |
| 84549_at  | 84549  | ENSG000001MAK16    | MAK16 homolog (S. ce     | I  | 16 | -1.11426 | -1.22359 | -1.46352 | -1.17504 | -1.1682  | 8.639309 | 146.4489  | 3.06E-07 | 9.69E-06 | 1 |
| 9688_at   | 9688   | ENSG000001NUP93    | nucleoporin 93kDa        | I  | 11 | -1.09501 | -1.18089 | -1.51176 | -1.20774 | -1.21225 | 10.01144 | 148.824   | 2.89E-07 | 9.25E-06 | 1 |
| 57512_at  | 57512  | ENSG000001GPR158   | G protein-c G-protein c  | I  | 22 | -1.2862  | -1.18388 | -1.43485 | -1.2796  | -1.32881 | 4.778105 | 144.0445  | 3.26E-07 | 9.92E-06 | 1 |
| 79191_at  | 79191  | ENSG000001IRX3     | iroquois homeobox 3      | I  | 14 | -1.36493 | -1.22794 | -1.4983  | -1.38586 | -1.22787 | 6.45052  | 43.09579  | 2.58E-05 | 0.0002   | 1 |
| 55840_at  | 55840  | ENSG000001EAF2     | ELL associated factor 2  | I  | 11 | -1.45768 | -1.23181 | -1.35396 | -1.14968 | -1.26209 | 5.313234 | 84.04392  | 2.33E-06 | 3.63E-05 | 1 |
| 5432_at   | 5432   | ENSG000001POLR2C   | polymerase (RNA) II (D   | I  | 23 | -1.41391 | -1.34091 | -1.43047 | -1.19308 | -1.16513 | 9.189368 | 141.5293  | 3.47E-07 | 1.03E-05 | 1 |
| 2588_at   | 2588   | ENSG000001GALNS    | galactosamin Secreted    | I  | 18 | -1.32843 | -1.31712 | -1.37582 | -1.21138 | -1.21565 | 6.470605 | 98.88877  | 1.29E-06 | 2.40E-05 | 1 |
| 25813_at  | 25813  | ENSG000001SAMM50   | sorting and assembly r   | I  | 10 | -1.37683 | -1.3457  | -1.36966 | -1.2648  | -1.27891 | 10.40314 | 180.8253  | 1.41E-07 | 6.21E-06 | 1 |
| 10058_at  | 10058  | ENSG000001ABCB6    | ATP-binding transport    | NI | 18 | -1.44347 | -1.14501 | -0.87113 | -0.95186 | -1.43961 | 5.186004 | 93.76582  | 1.56E-06 | 2.73E-05 | 1 |
| 6767_at   | 6767   | ENSG000001ST13     | suppressor Secreted      | I  | 3  | -1.51734 | -1.22971 | -0.87694 | -0.86256 | -1.09941 | 8.864951 | 26.25611  | 0.000147 | 0.000759 | 1 |
| 114088_at | 114088 | ENSG000001TRIM9    | tripartite motif contain | I  | 33 | -1.5043  | -1.30287 | -0.8433  | -1.03754 | -1.12275 | 3.828478 | 117.5942  | 6.85E-07 | 1.62E-05 | 1 |
| 84284_at  | 84284  | ENSG000001NTPCR    | nucleoside kinase        | I  | 20 | -1.4464  | -1.18847 | -0.99704 | -1.13386 | -1.1994  | 8.164377 | 109.9549  | 8.75E-07 | 1.92E-05 | 1 |
| 80150_at  | 80150  | ENSG000001ASRGL1   | asparaginase like 1      | I  | 22 | -1.56172 | -1.19133 | -0.99285 | -1.07145 | -1.17577 | 4.808592 | 99.96258  | 1.24E-06 | 2.36E-05 | 1 |
| 64946_at  | 64946  | ENSG000001CENPH    | centromere protein H     | I  | 9  | -1.48259 | -1.10399 | -0.91378 | -1.04753 | -0.81844 | 7.492079 | 38.06703  | 4.00E-05 | 0.000278 | 1 |
| 149345_at | 149345 | ENSG000001SHISA4   | shisa homolog 4 (Xeno    | I  | 11 | -1.37108 | -1.15488 | -1.00416 | -1.03726 | -1.00247 | 7.403385 | 37.78662  | 4.11E-05 | 0.000284 | 1 |
| 4232_at   | 4232   | ENSG000001MEST     | mesoderm specific tra    | NI | 21 | -1.51055 | -1.1322  | -0.93487 | -1.03249 | -1.03945 | 5.065899 | 140.8466  | 3.54E-07 | 1.04E-05 | 1 |
| 144501_at | 144501 | ENSG000001KRT80    | keratin 80               | I  | 11 | -1.39972 | -1.00404 | -0.76169 | -1.16906 | -0.93956 | 7.220336 | 62.76701  | 6.70E-06 | 7.44E-05 | 1 |
| 23729_at  | 23729  | ENSG000001SHPK     | sedoheptul kinase        | I  | 20 | -1.32644 | -1.00893 | -0.85195 | -1.19439 | -1.18869 | 4.13715  | 117.2747  | 6.91E-07 | 1.63E-05 | 1 |
| 91949_at  | 91949  | ENSG000001COG7     | component of oligome     | NI | 10 | -1.46909 | -1.00062 | -0.93025 | -1.17446 | -1.20115 | 5.855463 | 46.05466  | 2.03E-05 | 0.000166 | 1 |
| 1265_at   | 1265   | ENSG000001CNN2     | calponin 2               | I  | 70 | -1.42341 | -0.94305 | -0.96889 | -0.9698  | -1.1025  | 5.175032 | 112.3762  | 8.08E-07 | 1.81E-05 | 1 |
| 116447_at | 116447 | ENSG000001TOP1MT   | topoisomerase (DNA) II   | I  | 27 | -1.39445 | -0.94505 | -1.1534  | -0.9105  | -1.0363  | 7.326209 | 82.47212  | 2.49E-06 | 3.76E-05 | 1 |
| 9121_at   | 9121   | ENSG000001SLC16A5  | solute carrier transport | NI | 11 | -1.35826 | -1.05094 | -1.10434 | -1.13165 | -1.04346 | 4.163612 | 40.29303  | 3.27E-05 | 0.000239 | 1 |
| 682_at    | 682    | ENSG000001BSG      | basigin (Ok blood grou   | I  | 64 | -1.29087 | -1.01391 | -1.06509 | -1.03693 | -1.20146 | 7.996197 | 75.38323  | 3.46E-06 | 4.71E-05 | 1 |
| 55850_at  | 55850  | ENSG000001USE1     | unconventional SNARE     | I  | 8  | -1.21449 | -1.03235 | -1.09954 | -1.09449 | -1.12639 | 8.979463 | 119.7506  | 6.41E-07 | 1.55E-05 | 1 |
| 197370_at | 197370 | ENSG000001NSMCE1   | non-SMC e Secreted       | I  | 19 | -1.23992 | -1.05593 | -1.10026 | -1.11263 | -1.12628 | 9.102802 | 143.749   | 3.28E-07 | 9.97E-06 | 1 |
| 115572_at | 115572 | ENSG000001FAM46B   | family with sequence s   | I  | 22 | -1.5977  | -1.22617 | -1.47344 | -0.96279 | -0.87928 | 5.95246  | 80.2427   | 2.76E-06 | 4.02E-05 | 1 |
| 93664_at  | 93664  | ENSG000001CADPS2   | Ca++-dependent secre     | I  | 33 | -1.75074 | -1.42086 | -1.38073 | -0.94709 | -1.10013 | 5.431935 | 73.34052  | 3.82E-06 | 5.02E-05 | 1 |
| 3223_at   | 3223   | ENSG000001HOXC6    | homeobox C6              | I  | 33 | -1.66865 | -1.35287 | -1.46038 | -1.02571 | -1.14831 | 6.821147 | 164.2047  | 2.01E-07 | 7.55E-06 | 1 |
| 3693_at   | 3693   | ENSG000001ITGB5    | integrin, beta Secreted  | I  | 11 | -1.38413 | -1.23831 | -1.03786 | -0.87538 | -1.11429 | 10.17135 | 106.8012  | 9.73E-07 | 2.04E-05 | 1 |
| 686_at    | 686    | ENSG000001BTD      | biotinidase Secreted     | I  | 11 | -1.52237 | -1.23627 | -1.07421 | -0.7957  | -1.09082 | 6.13469  | 132.9658  | 4.37E-07 | 1.21E-05 | 1 |
| 8406_at   | 8406   | ENSG000001SRPX     | sushi-repe: Secreted     | I  | 11 | -1.35711 | -1.34058 | -1.18297 | -0.8159  | -1.01244 | 10.86959 | 108.3799  | 9.22E-07 | 1.99E-05 | 1 |
| 2013_at   | 2013   | ENSG000001EMP2     | epithelial membrane p    | I  | 39 | -1.44846 | -1.29924 | -1.27505 | -0.97511 | -0.98868 | 6.467078 | 95.84041  | 1.44E-06 | 2.59E-05 | 1 |
| 4493_at   | 4493   | ENSG000001MT1E     | metallothionein 1E       | I  | 9  | -1.38085 | -1.05894 | -1.54827 | -0.7901  | -0.98044 | 9.945592 | 83.56105  | 2.38E-06 | 3.66E-05 | 1 |
| 10954_at  | 10954  | ENSG000001PDIA5    | protein dis Secreted     | I  | 8  | -1.50578 | -1.07276 | -1.47128 | -1.05075 | -1.20726 | 8.013885 | 133.0149  | 4.36E-07 | 1.21E-05 | 1 |
| 9197_at   | 9197   | ENSG000001SLC33A1  | solute carrier transport | I  | 31 | -1.58075 | -1.12819 | -1.60988 | -1.04247 | -1.16917 | 7.894254 | 86.61214  | 2.09E-06 | 3.34E-05 | 1 |
| 94122_at  | 94122  | ENSG000001SYTL5    | synaptotagmin-like 5     | I  | 22 | -1.41757 | -1.40429 | -1.30833 | -0.82837 | -1.38722 | 4.283191 | 169.7247  | 1.78E-07 | 7.03E-06 | 1 |
| 10404_at  | 10404  | ENSG000001PGCP     | plasma glu: peptidase    | I  | 20 | -1.47071 | -1.30303 | -1.48655 | -0.94336 | -1.47653 | 5.291663 | 113.7344  | 7.73E-07 | 1.76E-05 | 1 |
| 387521_at | 387521 | ENSG000001TMEM189  | transmembrane protei     | I  | 33 | -1.33622 | -1.21506 | -1.29344 | -0.84436 | -1.24567 | 7.772516 | 122.9544  | 5.82E-07 | 1.47E-05 | 1 |
| 64776_at  | 64776  | ENSG000001C11orf1  | chromosome 11 open       | I  | 11 | -1.38643 | -1.25263 | -1.27283 | -0.99517 | -1.24553 | 8.632309 | 129.6874  | 4.78E-07 | 1.29E-05 | 1 |
| 5351_at   | 5351   | ENSG000001PLOD1    | procollagen Secreted     | I  | 22 | -1.55084 | -1.2835  | -1.34493 | -1.00893 | -1.19635 | 8.042343 | 34.82117  | 5.48E-05 | 0.000354 | 1 |
| 83746_at  | 83746  | ENSG000001L3MBTL2  | (l3)mbt-like 2 (Drosop   | I  | 11 | -1.42193 | -1.3296  | -1.41205 | -1.03315 | -1.25566 | 5.963691 | 54.23778  | 1.13E-05 | 0.000108 | 1 |
| 4814_at   | 4814   | ENSG000001NINJ1    | ninjurin 1               | I  | 11 | -1.02164 | -1.26923 | -1.31551 | -0.87267 | -1.23947 | 7.072529 | 54.44779  | 1.12E-05 | 0.000107 | 1 |
| 79415_at  | 79415  | ENSG000001C17orf62 | chromosome 17 open       | I  | 11 | -0.99327 | -1.1288  | -1.37426 | -1.02125 | -1.20319 | 8.692485 | 103.5315  | 1.09E-06 | 2.19E-05 | 1 |
| 10126_at  | 10126  | ENSG000001DNAL4    | dynein, axonemal, high   | I  | 19 | -1.0402  | -1.06762 | -1.29798 | -0.93214 | -1.08892 | 4.581838 | 59.97178  | 7.90E-06 | 8.32E-05 | 1 |
| 54939_at  | 54939  | ENSG000001COMMD4   | COMM domain contain      | I  | 10 | -0.97566 | -1.10276 | -1.29357 | -1.01031 | -1.05234 | 8.379399 | 121.103   | 6.15E-07 | 1.52E-05 | 1 |
| 54093_at  | 54093  | ENSG000001SETD4    | SET domain containing    | I  | 22 | -1.05569 | -1.22202 | -1.14378 | -0.86531 | -1.03176 | 6.228343 | 52.18777  | 1.30E-05 | 0.00012  | 1 |
| 79447_at  | 79447  | ENSG000001C16orf53 | chromosome 16 open       | I  | 21 | -1.04358 | -1.08363 | -1.00052 | -0.8954  | -1.04005 | 7.315715 | 80.53507  | 2.72E-06 | 3.99E-05 | 1 |
| 373156_at | 373156 | ENSG000001GSTK1    | glutathione S-transfer   | I  | 11 | -1.0457  | -1.03254 | -1.0999  | -0.88194 | -1.048   | 9.486377 | 116.1536  | 7.16E-07 | 1.67E-05 | 1 |
| 112770_at | 112770 | ENSG000001C1orf85  | chromosome 1 open r      | I  | 40 | -1.11784 | -1.16182 | -0.93822 | -0.96012 | -1.02157 | 7.683277 | 115.6266  | 7.28E-07 | 1.69E-05 | 1 |
| 10467_at  | 10467  | ENSG000001ZNHT1    | zinc finger, HIT-type c  | I  | 9  | -1.15114 | -1.16114 | -1.01348 | -0.90013 | -1.09458 | 10.06381 | 116.8859  | 7.00E-07 | 1.64E-05 | 1 |
| 25873_at  | 25873  | ENSG000001RPL36    | ribosomal protein L36    | I  | 17 | -1.19856 | -1.14259 | -1.01592 | -0.9372  | -1.15699 | 8.147556 | 88.8527   | 1.90E-06 | 3.11E-05 | 1 |
| 6171_at   | 6171   | ENSG000001RPL41    | ribosomal protein L41    | I  | 11 | -1.1922  | -1.1437  | -1.28981 | -0.98821 | -0.92756 | 9.174893 | 58.95527  | 8.40E-06 | 8.70E-05 | 1 |
| 1938_at   | 1938   | ENSG000001EEF2     | eukaryotic GTPase        | I  | 77 | -1.23955 | -1.15297 | -1.30124 | -1.06018 | -0.97263 | 11.91947 | 137.0147  | 3.91E-07 | 1.12E-05 | 1 |
| 10437_at  | 10437  | ENSG000001IFI30    | interferon, gamma-ind    | I  | 11 | -1.30151 | -1.09667 | -1.30591 | -0.93477 | -1.06598 | 9.851323 | 33.86988  | 6.04E-05 | 0.00038  | 1 |
| 161882_at | 161882 | ENSG000001ZFPM1    | zinc finger protein, mu  | I  | 11 | -1.28189 | -1.22815 | -1.21508 | -0.89818 | -1.08756 | 5.342036 | 79.26331  | 2.88E-06 | 4.16E-05 | 1 |
| 1652_at   | 1652   | ENSG000001DDT      | D-dopachrome tautorr     | I  | 8  | -1.33234 | -1.13214 | -1.32443 | -1.06741 | -0.97792 | 10.82736 | 92.63215  | 1.64E-06 | 2.84E-05 | 1 |
| 8079_at   | 8079   | ENSG000001MLF2     | myeloid leukemia fact    | I  | 9  | -1.28278 | -1.24602 | -1.23063 | -1.07124 | -1.04367 | 8.059611 | 76.75835  | 3.24E-06 | 4.50E-05 | 1 |
| 140707_at | 140707 | ENSG000001BRI3BP   | BRI3 binding protein     | I  | 10 | -1.36664 | -1.2043  | -1.15066 | -1.09061 | -1.02536 | 5.747869 | 88.93292  | 1.90E-06 | 3.11E-05 | 1 |
| 55164_at  | 55164  | ENSG000001SHQ1     | SHQ1 homolog (S. cere    | I  | 30 | -1.35498 | -1.28538 | -1.17961 | -1.05441 | -1.01616 | 6.944766 | 159.9057  | 2.22E-07 | 8.02E-06 | 1 |
| 10095_at  | 10095  | ENSG000001ARPC1B   | actin related protein 2  | I  | 11 | -1.15074 | -1.27569 | -1.21009 | -1.07102 | -1.10599 | 11.16047 | 132.1813  | 4.46E-07 | 1.23E-05 | 1 |
| 284129_at | 284129 | ENSG000001SLC26A11 | solute carrier transport | NI | 10 | -1.16853 | -1.17776 | -1.15684 | -1.00569 | -1.05568 | 5.379583 | 71.39992  | 4.21E-06 | 5.37E-05 | 1 |
| 80011_at  | 80011  | ENSG000001FAM192A  | family with sequence s   | I  | 24 | -1.16651 | -1.18642 | -1.20258 | -1.07764 | -1.05476 | 8.02647  | 118.26017 | 6.71E-07 | 1.60E-05 | 1 |
| 3959_at   | 3959   | ENSG000001LGALS3BP | lectin, gala Secreted    | I  | 11 | -1.26    | -1.16763 | -1.07127 | -0.97357 | -1.17622 | 9.598908 | 131.595   | 4.54E-07 | 1.24E-05 | 1 |
| 5510_at   | 5510   | ENSG000001PPP1R7   | protein phosphatase 1    | I  | 20 | -1.22338 | -1.18796 | -1.13347 | -0.99545 | -1.17326 | 8.531521 | 136.8027  | 3.93E-07 | 1.12E-05 | 1 |
| 2806_at   | 2806   | ENSG000001GOT2     | glutamic-oxaloacetic tr  | I  | 42 | -1.17983 | -1.19077 | -1.1428  | -1.09917 | -1.151   | 9.463929 | 145.7642  | 3.12E-07 |          |   |

|           |        |                 |                                                |    |          |          |          |          |          |          |          |          |          |   |
|-----------|--------|-----------------|------------------------------------------------|----|----------|----------|----------|----------|----------|----------|----------|----------|----------|---|
| 25880_at  | 25880  | ENSG00000126186 | transmembrane protein 186                      | 11 | -0.96772 | -1.09433 | -1.15854 | -1.01051 | -0.97609 | 7.88409  | 129.0542 | 4.87E-07 | 1.30E-05 | 1 |
| 80020_at  | 80020  | ENSG00000126187 | FAD-dependent oxidoreductase 2                 | 41 | -0.88573 | -1.10323 | -1.24581 | -1.03952 | -0.9366  | 7.746604 | 112.5561 | 8.03E-07 | 1.81E-05 | 1 |
| 79663_at  | 79663  | ENSG00000126188 | HSPB1 (heat shock 27kD protein 1)              | 19 | -0.8653  | -1.21741 | -1.09075 | -1.15431 | -0.94629 | 4.935192 | 71.55071 | 4.18E-06 | 5.34E-05 | 1 |
| 283951_at | 283951 | ENSG00000126189 | chromosome 16 open reading frame 1             | 11 | -0.89994 | -1.20863 | -1.18179 | -1.12079 | -1.02737 | 9.042469 | 129.728  | 4.78E-07 | 1.29E-05 | 1 |
| 84752_at  | 84752  | ENSG00000126190 | UDP-GlcNAc 6-epimerase                         | 11 | -0.85088 | -1.15125 | -1.04678 | -0.6278  | -1.15723 | 4.75843  | 34.30289 | 5.77E-05 | 0.000368 | 1 |
| 128439_at | 128439 | NA              | small nucleolar RNA host protein 1             | 17 | -0.80382 | -1.37883 | -1.18994 | -0.67046 | -1.24804 | 6.24979  | 58.68887 | 8.54E-06 | 8.79E-05 | 1 |
| 387787_at | 387787 | ENSG00000126191 | lipoyl(octanoyl) transferase                   | 10 | -0.96427 | -1.42209 | -1.11355 | -0.75431 | -1.09119 | 4.5948   | 17.71194 | 0.000559 | 0.002235 | 1 |
| 5476_at   | 5476   | ENSG00000126192 | cathepsin A peptidase                          | 21 | -0.99072 | -1.07816 | -0.9816  | -0.95682 | -1.16995 | 9.909964 | 119.7391 | 6.41E-07 | 1.55E-05 | 1 |
| 90871_at  | 90871  | ENSG00000126193 | chromosome 9 open reading frame 1              | 36 | -0.97561 | -1.00516 | -0.87704 | -0.94176 | -1.16736 | 4.593218 | 72.11995 | 4.06E-06 | 5.23E-05 | 1 |
| 84269_at  | 84269  | ENSG00000126194 | coiled-coil-helix-coiled-coil domain protein 5 | 11 | -0.99454 | -1.06067 | -0.80961 | -1.03104 | -1.16784 | 6.261441 | 60.7492  | 7.54E-06 | 8.03E-05 | 1 |
| 283377_at | 283377 | ENSG00000126195 | SPRY domain containing protein 4               | 21 | -1.0119  | -1.22661 | -0.8751  | -1.09854 | -1.337   | 5.761232 | 113.8707 | 7.70E-07 | 1.76E-05 | 1 |
| 7106_at   | 7106   | ENSG00000126196 | tetraspanin 4                                  | 39 | -0.89826 | -1.12897 | -0.8532  | -1.03269 | -1.37594 | 9.261917 | 115.1083 | 7.40E-07 | 1.71E-05 | 1 |
| 80381_at  | 80381  | ENSG00000126197 | CD276 molecule                                 | 22 | -0.92323 | -1.08751 | -0.97285 | -1.00576 | -1.42506 | 5.942438 | 101.7219 | 1.16E-06 | 2.27E-05 | 1 |
| 9016_at   | 9016   | ENSG00000126198 | solute carrier family 25A member 14            | 14 | -0.79727 | -1.16727 | -0.86358 | -1.04812 | -1.12704 | 6.658414 | 35.53329 | 5.10E-05 | 0.000335 | 1 |
| 22994_at  | 22994  | ENSG00000126199 | 5-azacytidine induced protein 1                | 9  | -0.84206 | -1.25577 | -0.81959 | -1.09622 | -1.14252 | 5.741604 | 44.49533 | 2.30E-05 | 0.000182 | 1 |
| 7091_at   | 7091   | ENSG00000126200 | transducin-like enhancer protein 4             | 30 | -0.96266 | -1.2828  | -0.89262 | -1.23235 | -1.07774 | 4.210652 | 108.6801 | 9.13E-07 | 1.98E-05 | 1 |
| 1174_at   | 1174   | ENSG00000126201 | adaptor-related protein 151                    | 20 | -1.03811 | -1.21797 | -0.9444  | -1.23317 | -1.04674 | 8.262207 | 84.40897 | 2.29E-06 | 3.58E-05 | 1 |
| 57461_at  | 57461  | ENSG00000126202 | ISY1 splicing factor homolog 1                 | 18 | -1.03043 | -1.17767 | -0.95591 | -1.11708 | -0.93498 | 8.882849 | 110.5849 | 8.57E-07 | 1.89E-05 | 1 |
| 6778_at   | 6778   | ENSG00000126203 | signal transducer protein 6                    | 42 | -0.98327 | -1.2745  | -1.0014  | -1.04348 | -1.02308 | 5.210268 | 87.70724 | 1.99E-06 | 3.23E-05 | 1 |
| 9054_at   | 9054   | ENSG00000126204 | NFS1 nitroarginine secreted protein 1          | 34 | -1.05444 | -1.28538 | -0.95481 | -1.04228 | -1.02978 | 7.13901  | 94.23419 | 1.54E-06 | 2.70E-05 | 1 |
